# Supplementary material for: Altered Blood–Brain Barrier Dynamics in the C9orf72 Hexanucleotide Repeat Expansion Mouse Model of Amyotrophic Lateral Sclerosis
Source: MDPI journal article supplement (doi:10.3390/pharmaceutics14122803), 2022-12-14
Supplement: s1 [file s1]

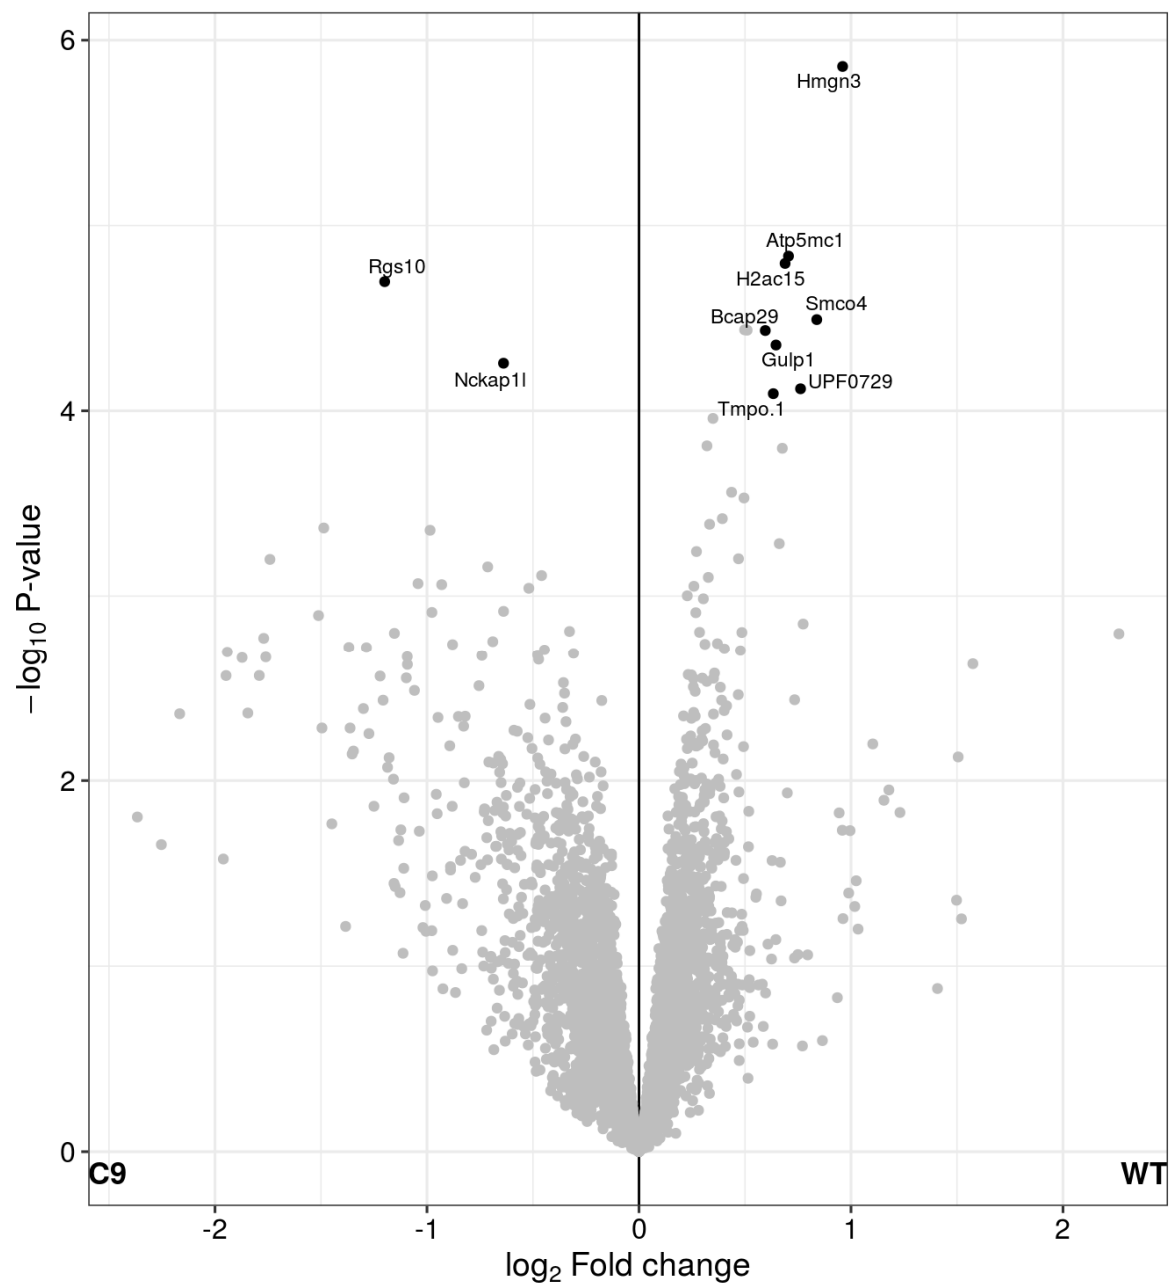

**Figure S1.** Volcano plot of differentially expressed proteins between = BMECs isolated from 145-150 days old female WT and C9 mice (n=8 per genotype).

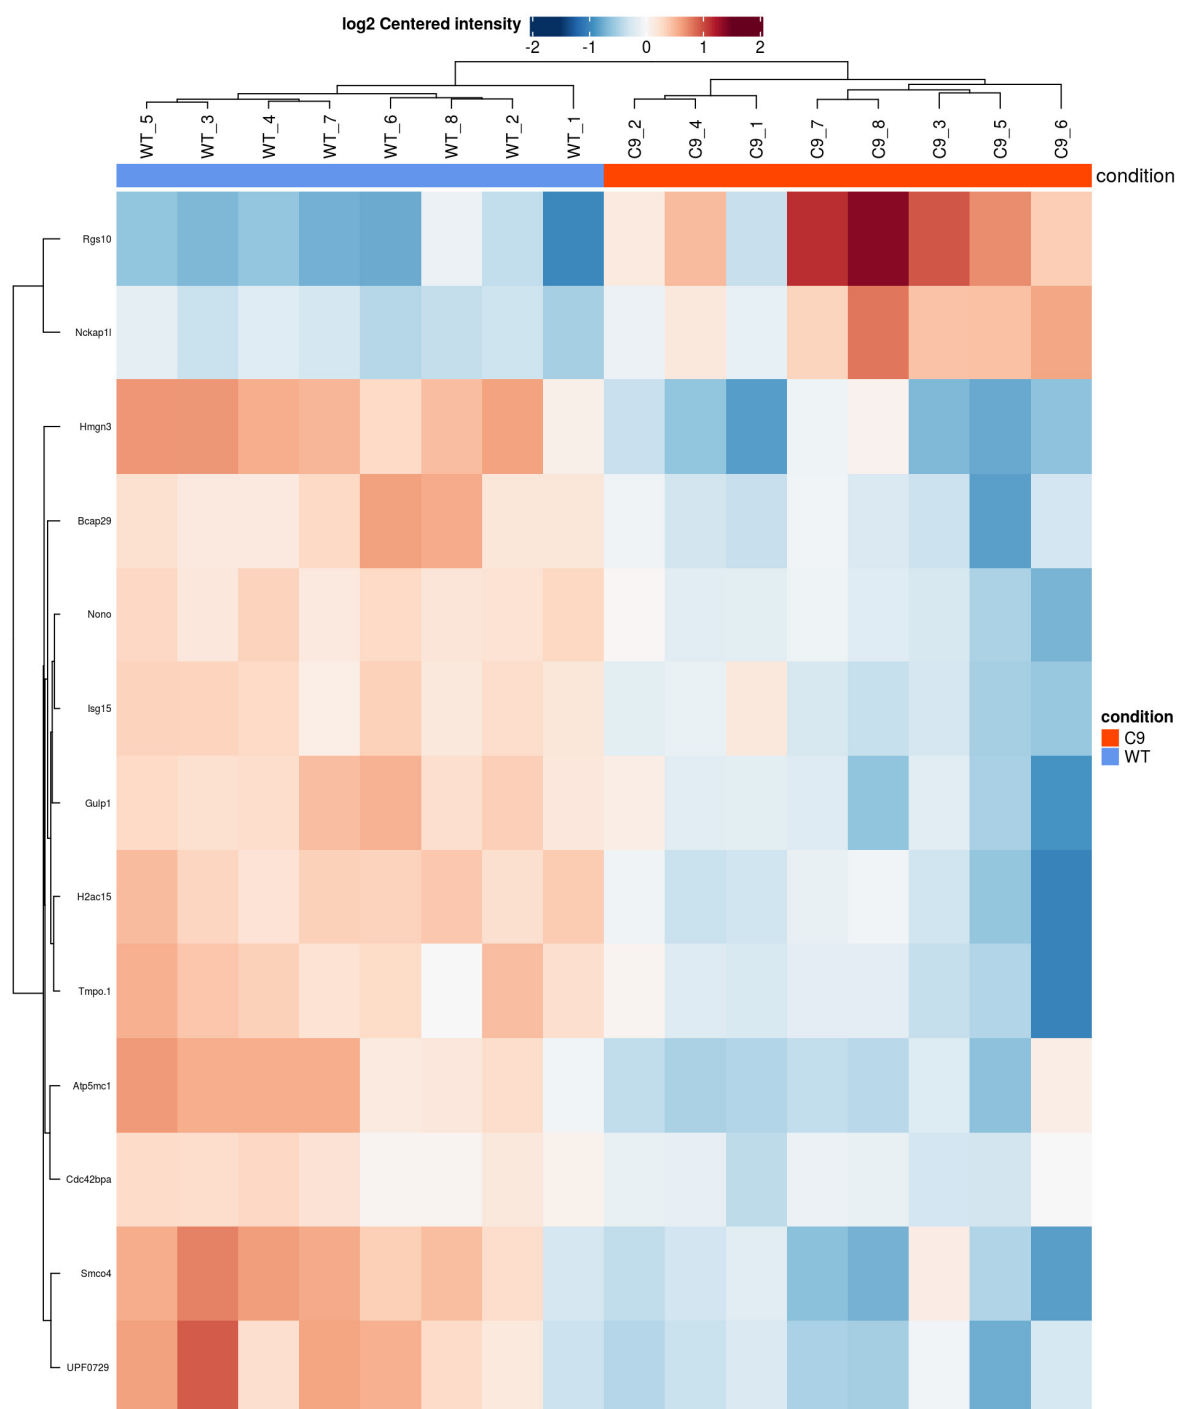

**Figure S2.** Heatmap of significant differentially expressed proteins between BMECs isolated from 145-150 day old female WT and C9 mice (n=8 per genotype).
