# Supplementary material for: Altered Blood–Brain Barrier Dynamics in the C9orf72 Hexanucleotide Repeat Expansion Mouse Model of Amyotrophic Lateral Sclerosis
Source: Pharmaceutics. 2022 Dec 14;14(12):2803. doi: 10.3390/pharmaceutics14122803 (PMC9783795; doi:10.3390/pharmaceutics14122803)
Supplement: Supplementary file 1 [file pharmaceutics-14-02803-s001.zip › Supplementary Materials Spreadsheet S1 - Imputed normalized intensity.xlsx]

## Sheet: Imputed normalized intensity
	WT_1	WT_2	WT_3	WT_4	WT_5	WT_6	WT_7	WT_8	C9_1	C9_2	C9_3	C9_4	C9_5	C9_6	C9_7	C9_8
A1bg	18.3098	18.1447	18.1706	17.9436	17.8118	18.183	17.3368	17.7884	18.4035	18.0421	18.1505	18.0343	17.8759	17.72	18.2593	17.9843
Aaas	12.5632	12.4277	12.3883	12.5016	12.2966	12.4459	12.5083	12.8249	12.6429	12.5974	12.4406	12.7786	12.8017	12.8236	12.4533	12.7966
Aacs	12.4342	12.3071	12.3512	12.265	12.3813	13.0595	13.7937	12.7426	12.4484	12.4501	12.623	12.4836	12.6623	13.2688	12.562	12.6541
Aak1	17.9469	17.8419	18.0706	17.8202	17.9811	18.0019	17.7915	17.6308	17.9909	17.7981	18.0648	18.098	18.0517	18.537	18.0074	18.1863
Aamdc	16.2184	16.368	16.237	16.3618	16.399	16.639	16.4775	16.2394	16.3549	16.2137	16.3017	16.3231	16.0833	16.2499	16.1163	16.1476
Aar2	13.7679	13.6424	13.5886	13.7341	13.6422	13.5201	13.5012	13.9235	13.8017	13.4696	13.8258	13.7723	13.6391	14.1487	13.3071	13.3695
Aars1	18.7043	18.7816	18.9642	18.8178	19.0056	18.9791	19.0972	18.7834	18.7118	18.566	18.9867	18.8241	18.774	19.3263	18.8005	19.2133
Aarsd1	15.8246	15.6626	15.6	15.4611	15.668	15.869	15.4587	15.709	15.4735	15.7388	15.6034	15.697	15.7361	15.5961	15.5987	15.694
Aasdhppt	13.4977	13.5474	13.4784	13.4253	13.5731	13.6703	13.7186	13.626	13.6558	13.4769	13.7215	13.5873	13.5885	13.5746	13.4745	13.5518
Aass	11.8323	12.0886	11.9416	11.7923	11.8233	12.7773	13.1006	12.2694	12.2212	12.0714	12.0737	12.0244	12.0736	12.6727	11.9537	12.135
Aatf	13.6218	13.3365	13.184	13.3654	13.1959	12.8611	12.7835	13.4902	13.4336	13.3734	13.5155	13.2675	13.2439	12.8995	13.1489	13.378
Abat	20.55	20.352	20.1382	20.3405	20.0488	20.1631	20.483	20.2276	19.3377	21.1519	20.231	20.1265	20.7439	21.6172	20.5676	20.4232
Abca2	12.8201	12.9081	12.7288	12.9991	12.9487	13.3574	13.4451	13.1821	12.8331	12.7608	12.7915	12.7688	12.578	13.4243	12.7707	12.5105
Abca9	15.7925	15.7132	15.5585	15.5324	15.5116	13.9335	14.2845	14.7087	15.4342	15.5812	15.5112	15.5638	16.4004	15.5287	16.1164	16.3053
Abcb10	16.9371	16.8681	16.8712	17.0065	16.9156	16.9023	16.9324	16.7614	16.8213	16.7789	16.8556	16.8477	16.7879	16.548	16.9363	16.8248
Abcb11	18.5343	18.5425	18.4954	18.5626	18.5878	18.8034	18.802	18.812	18.4058	18.4873	18.3797	18.3427	18.1924	16.2586	18.5048	18.1592
Abcb1a	24.1893	24.106	24.2392	24.2378	24.3372	24.1473	23.9449	24.1381	24.4127	24.2309	24.21	24.2368	23.4777	21.9905	23.7663	23.5228
Abcb4	14.8502	14.9992	14.8409	15.3801	14.9069	14.8165	14.9256	15.0445	14.9801	14.9428	14.9026	15.0809	14.778	14.4598	14.814	14.7989
Abcb7	17.0984	17.076	17.1115	17.2646	17.1259	17.3307	17.2581	17.2712	17.0475	17.0865	16.981	17.1855	17.5396	17.6785	17.3954	17.385
Abcb8	12.767	13.2854	13.3156	12.9519	12.79	12.6974	12.9583	13.4269	13.2288	13.2433	13.7647	14.0767	13.3929	13.6291	13.3587	13.0209
Abcc1	12.5404	12.6515	12.4151	12.3377	12.4538	12.6455	13.3178	13.1619	12.6163	12.4743	12.552	12.4389	12.4312	13.131	12.2125	12.27
Abcc9	15.8179	16.1715	15.9973	15.95	15.8578	15.2679	14.1125	14.7777	16.082	16.0322	16.0531	16.1292	16.1464	14.8466	16.0657	16.1552
Abcd1	14.9486	14.6505	14.7641	14.8782	14.7932	14.7092	14.0612	14.584	14.8774	14.6894	14.6811	14.7537	14.6266	13.668	14.7905	14.8435
Abcd3	17.2642	17.12	16.9857	17.2223	16.9535	16.9535	19.0673	17.2286	16.9191	17.4257	17.1078	17.0739	17.2967	17.2549	17.2594	17.1765
Abcd4	14.0697	14.2251	14.0566	14.1095	14.1214	14.2379	13.8459	14.1041	14.2615	14.2323	14.2087	14.132	13.8933	13.738	14.0965	13.563
Abce1	17.826	17.787	17.7249	17.7488	17.8986	17.8661	18.127	17.8127	17.8729	17.6512	17.8754	17.8162	17.7149	17.6108	17.769	17.9291
Abcf1	17.7184	17.8908	17.8445	17.956	17.8639	17.8344	17.8036	17.7711	17.9901	17.8753	17.8858	17.8627	18.3957	17.8267	17.7949	17.875
Abcf2	16.6357	16.5812	16.5652	16.6527	16.5904	16.5922	16.4973	16.7536	16.6962	16.5801	16.6954	16.5995	16.4717	16.528	16.5317	16.7182
Abcf3	16.6888	16.5742	16.335	16.3505	16.5081	16.5812	16.7599	16.6054	16.5112	16.5721	16.5205	16.3715	16.3213	16.0189	16.6391	16.5911
Abcg2	20.2006	20.0861	20.2107	20.2288	20.2378	20.3176	20.2227	20.3224	20.4147	20.2097	20.1775	20.223	19.7175	18.7221	19.8526	19.7215
Abhd10	15.0522	15.1619	15.1009	15.1024	15.0719	15.2697	15.0796	15.0693	14.8709	15.0054	14.8088	14.9242	15.2459	15.8279	15.1642	15.3014
Abhd11	15.428	15.391	15.4809	15.396	15.2638	14.9244	15.4691	14.7499	15.5716	15.4962	15.4904	15.5823	15.1571	15.154	15.3033	15.2536
Abhd12	18.8081	18.6136	18.5084	18.7212	18.4248	18.1954	17.755	18.3388	18.116	18.2433	18.3787	18.2335	18.532	19.0537	18.6219	18.8001
Abhd14b	18.9533	19.0362	18.7494	18.6419	18.7686	18.7628	19.1358	18.5509	18.5727	18.6993	18.5291	18.7338	18.8086	18.3774	18.6659	18.5492
Abhd16a	17.7058	17.678	17.6723	17.5998	17.6487	17.6669	17.5702	17.6697	17.6121	17.6779	17.6989	17.8742	17.6284	17.3625	17.7356	17.9421
Abhd17a	12.83	13.1177	12.9113	13.1192	13.2201	12.5768	13.0824	12.9954	13.3249	13.0712	13.1615	13.3076	13.4972	13.5359	13.1061	12.5085
Abhd4	14.324	14.5529	14.7428	14.4183	14.6233	14.6766	14.802	14.578	14.4181	14.8968	14.6105	14.5743	13.6108	15.0332	13.6425	13.9043
Abhd5	12.7961	12.8546	12.6756	12.681	12.896	12.3413	12.8619	13.31	12.8293	12.7609	13.1414	13.0351	13.0372	12.682	12.5452	12.391
Abhd6	18.1505	17.9884	18.1413	18.1431	18.1513	18.1365	18.1658	18.27	18.1663	18.1854	18.0695	18.279	17.8831	18.1058	17.9536	17.7133
Abi1	18.5948	18.5379	18.5884	18.4589	18.6614	18.6439	18.2785	18.4778	18.6284	18.5554	18.5493	18.5654	18.2026	18.294	18.4171	18.3689
Abi2	13.962	14.7318	14.5089	14.7751	14.5083	12.4246	14.4021	14.5021	14.6233	14.7579	14.3323	14.6844	12.192	12.8743	14.0046	14.3215
Ablim1	20.7021	20.5376	20.486	20.3151	20.62	20.5917	20.2997	20.192	20.6739	20.5954	20.4769	20.563	19.9236	19.1079	20.1535	19.7546
Abr	19.2026	19.1517	19.1305	19.0745	19.087	18.9856	19.0059	19.1109	18.976	19.1716	19.1069	19.1241	19.316	19.6664	19.1748	19.3473
Abraxas2	15.3517	15.1922	15.0021	14.9905	15.0226	15.1516	15.2226	15.2376	15.0187	15.264	14.9492	15.112	15.2903	14.8641	15.2142	14.9696
Acaa1a	19.0642	19.0016	18.9394	18.8125	18.8586	18.897	21.6748	18.9184	18.83	19.0677	18.9389	18.9061	19.2531	19.1188	19.0623	19.2144
Acaa2	21.7834	21.7187	21.6663	21.3713	21.6228	22.0053	22.8659	21.9867	21.4029	21.852	21.5892	21.7592	21.649	21.2136	21.8245	21.6872
Acaca	15.308	15.6603	15.7394	15.7565	15.5872	15.4204	16.5027	15.5217	15.6253	15.663	15.7641	15.623	15.8661	15.5538	15.6083	15.7077
Acacb	12.6573	11.8144	11.8564	12.4333	11.8731	12.5022	12.5286	12.8533	12.1269	11.95	12.0141	12.131	12.4251	13.023	12.5203	12.3464
Acad10	16.9784	17.1089	17.0229	16.9903	16.9075	16.9633	17.2881	16.818	16.908	17.0247	17.0551	17.0369	17.239	17.1953	17.1084	17.1865
Acad8	18.168	18.4479	18.2467	18.2959	18.1383	18.7539	19.2956	19.1141	18.0305	18.5955	18.1954	18.5504	18.3198	17.807	18.3644	18.3493
Acad9	19.9721	19.9979	19.9708	20.1241	19.9937	20.0948	20.1011	20.1529	19.937	20.0706	19.9558	19.9199	20.1318	19.7744	20.1398	20.1062
Acadl	21.9384	21.7974	21.7717	21.7313	21.7985	22.0203	22.096	21.9191	21.6007	22.0465	21.7355	21.7701	21.6745	21.4352	21.9311	21.7278
Acadm	20.1263	20.1516	20.1088	19.9977	20.0844	20.1685	20.8424	20.234	19.9166	20.2144	20.0566	20.1451	20.4938	19.713	20.338	20.4034
Acads	19.7638	19.6971	19.5968	19.5207	19.5379	19.6826	20.21	19.5679	19.4123	19.7814	19.5837	19.6783	19.7763	19.1821	19.7774	19.8147
Acadsb	18.3153	18.383	18.0934	18.165	18.0788	18.5822	18.8472	18.6834	18.0398	18.3949	18.0307	18.2513	18.6146	18.5991	18.5171	18.5051
Acadvl	21.483	21.4747	21.4506	21.4873	21.5179	21.5961	21.8304	21.6428	21.3451	21.519	21.4124	21.4242	21.433	20.9689	21.5958	21.5577
Acap2	17.7835	17.8236	17.7646	17.9071	17.835	17.5919	17.3925	17.6386	17.8184	17.7236	17.7457	17.7634	17.7257	17.6762	17.6886	17.6388
Acat1	21.6713	21.5396	21.4331	21.3158	21.4983	21.8696	22.3751	21.6467	21.0972	21.6749	21.4286	21.4057	22.0607	22.3377	22.047	22.2798
Acat2	16.9655	16.9798	17.0897	17.0406	16.9608	17.0807	18.4273	17.0212	17.2261	16.8946	16.8772	17.2017	17.3679	18.1698	17.1562	17.2018
Acbd3	17.1378	17.2624	17.2656	17.3092	17.2497	17.1822	17.5711	17.3978	17.3217	17.3701	17.2638	17.2622	16.8421	16.3255	17.0917	16.8682
Acbd5	15.7586	15.6019	15.4817	15.6419	15.2511	15.7772	16.6897	15.4471	15.3387	15.8598	15.499	15.9038	15.552	16.0274	15.7336	15.5249
Acbd6	14.3739	14.1547	14.5912	14.1103	14.3585	13.9998	14.1056	14.0365	14.185	14.1839	14.5077	14.439	13.7989	13.8869	13.6381	14.6545
Ace	16.542	16.619	16.6845	16.6846	16.6214	16.8294	17.1282	17.1487	16.8653	16.6766	16.4367	16.7695	17.8717	17.3394	17.6094	17.6735
Ace2	19.7487	19.8142	19.9036	19.5412	19.7396	18.7727	18.0505	18.1889	19.4897	19.6577	19.5914	19.6948	19.8037	18.6487	20.0313	19.9778
Acin1	18.6633	18.5468	18.5473	18.5091	18.5132	18.5477	18.7295	18.6203	18.31	18.5663	18.4954	18.4212	18.2417	18.4102	18.4018	18.48
Ackr3	15.306	16.1309	15.6114	15.6836	15.7435	15.6145	14.9349	15.9407	15.4728	15.4433	15.6838	15.4551	15.8282	14.5246	15.4489	15.5243
Acly	20.5153	20.6404	20.7234	20.6466	20.7176	20.6126	21.419	20.6299	20.6497	20.4857	20.7192	20.695	20.8946	21.2153	20.7795	20.9094
Aco1	18.6835	18.7608	18.7442	18.6663	18.8108	18.3452	19.0052	18.5831	18.7562	18.6122	18.6894	18.6962	18.2596	18.3424	18.4037	18.3877
Aco2	22.5013	22.4984	22.4043	22.3236	22.4694	22.7516	22.972	22.8019	22.1612	22.6283	22.4008	22.3688	22.7207	23.3999	22.6916	22.8044
Acot1	12.6707	12.5837	12.5325	12.4037	12.5347	13.1095	13.6536	12.939	12.5935	12.5866	12.688	12.5238	13.2393	14.1724	12.7278	12.9102
Acot11	13.4872	13.418	13.2275	13.5647	13.2048	13.7315	13.0148	14.0383	13.2696	13.4296	13.4544	13.1817	13.693	14.9614	14.0316	14.065
Acot13	18.7379	18.7915	18.8789	18.8463	18.7974	18.9744	19.5154	19.1661	18.5316	18.8321	18.8461	18.8415	18.6835	19.6803	18.716	18.9996
Acot2	18.9904	18.9494	18.9978	18.902	18.8951	19.0382	19.016	18.9179	18.7797	19.0787	18.8935	18.9862	19.2252	19.1082	19.1794	19.1643
Acot7	17.4467	17.7442	18.3519	17.9505	18.333	18.8198	18.9051	18.3072	17.7475	16.9189	18.3526	18.2811	19.0253	20.5443	18.8752	19.3863
Acot8	13.5784	13.5	13.7126	13.7982	13.989	13.8329	14.0718	13.9817	13.3377	13.4678	13.9245	13.4416	13.672	14.2034	13.7642	13.673
Acot9	20.1276	20.1757	20.2562	20.3408	20.3137	20.1101	19.9539	20.2029	20.3115	20.281	20.2592	20.2544	20.0763	19.771	20.2227	20.1138
Acox1	18.4765	18.2599	18.2528	18.3807	18.1157	18.3992	21.2349	18.2465	18.0788	18.5597	18.1943	18.2348	18.5046	18.6069	18.5461	18.4823
Acox3	15.9134	15.9599	15.8074	15.8214	15.7479	15.4158	15.2581	15.6558	15.7753	15.7525	15.8375	15.7266	15.6512	15.8272	15.6725	15.3722
Acp1	17.2671	17.3495	17.2799	17.2284	17.3445	17.7181	17.8892	17.2744	17.1769	17.0312	17.0588	17.1047	17.1787	17.9629	17.0984	17.5148
Acp2	15.5674	15.8091	15.8645	15.7599	15.6225	14.8508	15.6009	15.5595	15.8626	15.5352	15.7375	15.6124	15.4877	15.2747	15.4423	15.6277
Acp6	18.208	18.0518	18.0924	18.0736	18.1253	18.3234	18.3239	18.416	18.0003	18.4171	18.201	18.1426	18.2896	18.2785	18.253	18.3961
Acsbg1	16.9724	16.3641	16.5391	17.0287	16.4543	16.2454	15.9063	15.7759	15.539	16.8381	16.7167	16.3935	17.3565	18.6235	17.4279	17.4492
Acsf2	18.6378	18.5961	18.5136	18.6777	18.4412	18.4943	19.1912	18.7077	18.1585	18.9313	18.6125	18.6001	19.2599	19.1053	19.0411	19.1536
Acsf3	14.8412	14.7125	14.6126	14.672	14.3421	15.3621	14.7194	14.157	14.6392	14.9328	14.9327	14.6709	14.9291	15.6467	15.1384	14.8317
Acsl1	19.7048	19.9669	19.9401	19.9657	19.7776	19.2905	20.7811	19.3453	19.4915	19.6983	19.6456	19.6712	19.9165	19.3934	19.9291	20.0281
Acsl3	17.5634	17.3983	17.3908	17.4087	17.529	17.41	16.908	17.3164	17.3231	17.7496	17.5193	17.5487	17.3412	17.7153	17.5929	17.247
Acsl4	16.5745	16.3935	16.3918	16.4419	16.4159	16.3691	16.572	16.2434	16.4816	16.4774	16.2797	16.2829	16.3825	16.3819	16.4862	16.293
Acsl5	18.1218	18.0276	18.211	18.2402	18.1321	18.0095	18.6136	17.9208	18.2295	18.2072	18.1413	18.386	18.4073	17.7193	18.1127	18.0245
Acsl6	19.234	18.9191	18.9342	19.3043	18.903	18.9018	18.9127	18.8267	18.4815	19.619	19.142	18.993	19.5266	20.5759	19.5077	19.4305
Acss1	15.95	15.8934	15.4548	15.8996	15.4537	15.6247	15.9154	15.8107	14.9152	16.2389	15.6395	15.846	16.3747	17.0084	16.0879	16.1259
Acss2	13.1381	13.3456	13.5596	13.3451	13.4673	12.5474	14.3487	13.901	13.1893	13.2723	13.8144	13.6749	13.8303	13.0911	13.6106	14.0865
Acss3	16.8214	16.8573	16.5163	16.6375	16.5667	17.3434	17.8807	17.7757	16.7662	16.8486	16.6227	17.0005	16.9353	17.1009	16.6683	16.5453
Acta2	23.7394	23.6981	23.4866	23.3399	23.4884	23.4142	22.9814	23.3513	23.1372	23.667	23.3783	23.334	24.1585	24.1193	24.0819	24.3218
Actb	25.9549	25.8821	25.8142	25.6976	25.7991	25.9329	25.6047	25.6755	25.6084	25.8724	25.6714	25.706	26.3152	26.0726	26.3099	26.5083
Actbl2	19.9366	19.6767	19.3621	19.3756	19.5443	20.1155	19.7007	19.961	19.2327	19.752	19.3787	19.4094	20.5094	20.1821	20.3369	20.6009
Actl6a	17.6181	17.3597	17.361	17.4118	17.3403	17.2926	17.4474	17.3675	17.424	17.5116	17.4725	17.4376	17.3151	17.0528	17.4216	17.2757
Actn1	22.1148	22.311	22.1071	22.0675	22.0904	22.0248	21.9627	22.0646	21.8828	22.186	21.9691	21.8393	22.226	22.1505	22.4355	22.6524
Actn3	16.5578	17.1337	17.0756	17.0124	17.0345	15.2135	15.3116	14.8329	17.1392	16.9888	17.0348	17.0724	15.9683	15.8301	16.1116	15.4931
Actn4	23.8431	23.9464	23.7821	23.8185	23.7794	23.8076	23.6908	23.7711	23.6355	23.8833	23.6647	23.609	23.8216	23.4312	23.856	23.9559
Actr10	17.0776	17.0758	17.0705	16.9507	17.0525	16.9516	16.6129	17.0234	16.9977	16.9256	17.1051	17.0605	17.0681	17.3505	17.0526	16.9896
Actr1a	20.0098	20.0004	20.0213	19.9154	20.0144	20.0033	19.3935	19.8237	19.9666	19.8455	19.9724	20.0221	20.0367	20.7136	20.0146	20.1007
Actr1b	16.5444	16.2861	16.1709	15.9883	16.2574	16.7195	16.2273	16.2888	15.9571	16.3036	16.1241	16.2383	16.7122	17.1378	16.7392	16.6627
Actr2	20.6019	20.6502	20.5884	20.6305	20.6613	20.3651	20.4484	20.5016	20.6398	20.6707	20.5534	20.5672	20.5918	20.3804	20.7395	20.7896
Actr3	20.5097	20.5625	20.5169	20.4607	20.5137	20.5912	20.4538	20.4889	20.5673	20.5667	20.4848	20.5652	20.7159	20.4474	20.7105	20.8388
Acvrl1	16.0361	16.1261	16.1462	16.2621	16.0739	16.3769	16.201	16.4534	16.1524	16.0979	16.1543	16.1136	16.0255	15.5642	15.8931	15.8314
Acy1	16.3773	16.5065	16.5511	16.3979	16.4029	16.5313	16.4897	16.2358	16.4358	16.2919	16.5715	16.4849	16.0901	17.3094	16.2494	16.5539
Acy3	15.3681	15.0545	15.2199	15.0831	15.2307	15.4781	15.5223	14.909	15.0903	15.0645	15.1518	15.1993	15.1941	15.9414	15.2044	15.1461
Acyp1	18.5807	18.635	18.5761	18.5129	18.6163	18.6474	18.5449	18.5159	18.5333	18.3012	18.5925	18.6607	18.6115	18.6548	18.3727	18.3879
Acyp2	17.099	17.2714	17.4498	17.2235	17.4601	17.334	17.3038	17.0057	17.0615	17.0038	17.1759	17.2766	17.0885	17.4094	16.9297	17.2798
Ada	14.6274	14.165	14.3332	14.4195	14.5186	14.7567	14.8893	14.5475	14.7345	14.3417	14.3729	14.3961	14.5986	14.9572	14.6695	14.8554
Adam10	19.7115	19.619	19.5965	19.6656	19.727	19.7449	19.7671	19.941	19.8713	19.7233	19.5368	19.6133	19.5992	19.4189	19.7792	19.8995
Adam15	15.2976	14.9907	14.9689	14.9171	15.0007	15.3576	14.9217	15.0096	14.9638	15.0374	14.9522	15.2039	15.2527	14.8282	15.2191	15.291
Adam17	16.7974	16.7454	16.7419	16.777	16.7627	16.8641	16.7417	16.8534	16.7855	16.7646	16.6613	16.6747	16.6639	15.9213	16.8725	16.8026
Adam22	13.9805	14.2173	14.5762	14.1277	14.281	14.8768	15.1281	14.3935	14.1418	13.365	14.6174	14.6444	14.9392	16.7796	14.754	15.2149
Adam23	13.5351	13.7675	14.2901	13.8131	14.1909	14.691	14.7067	13.3494	14.0679	12.429	13.8048	14.1222	14.512	16.6659	14.5289	14.6026
Adam9	13.7522	13.6904	13.9702	13.8049	13.9051	13.6011	13.763	13.9745	14.3327	13.9133	14.052	14.0226	13.854	13.9321	13.4687	13.7488
Adap2	15.6169	15.8992	15.9055	15.8781	15.576	14.5974	14.6017	15.1166	15.5164	15.6268	15.6642	15.6448	15.7285	15.324	15.8043	15.7254
Adar	17.3427	17.2417	17.3776	17.1332	17.3535	17.4035	17.1703	17.3792	17.4898	17.3793	17.2988	17.3088	17.1065	16.2629	17.3039	17.3425
Adat1	12.2321	12.274	12.2374	12.2222	12.2874	12.4705	12.7771	12.5923	12.5301	12.3476	12.4373	12.3504	12.667	13.2975	12.2288	12.6735
Adck1	15.1369	15.182	15.0923	15.2151	15.1577	15.5875	15.2979	15.2362	14.9583	15.208	15.094	15.2289	15.2014	15.664	15.4475	15.5335
Adcy4	14.6252	14.4348	14.4198	14.4501	14.4113	14.3363	14.1164	14.3025	14.7034	14.4875	14.4684	14.3657	13.9713	13.6776	14.2301	14.3106
Adcy6	15.5395	15.8295	15.7156	15.6828	15.5964	15.2135	15.1207	15.5858	15.4793	15.8104	15.5057	15.5632	15.8493	15.9479	15.9054	16.093
Adcy9	16.469	16.4907	16.5387	16.4957	16.5026	15.7441	15.724	16.2462	16.1043	16.3405	16.4561	16.4161	16.5439	16.4046	16.4771	16.7874
Add1	18.3171	18.2071	18.0428	17.9896	18.2411	18.2187	18.0686	18.0887	18.0666	18.2193	18.135	18.1077	18.1355	18.5619	18.2934	18.2271
Add2	16.6217	16.7143	17.2158	16.8825	17.1263	17.691	17.3212	16.8322	16.8154	16.3107	17.0939	17.0026	17.8761	19.2021	17.6754	18.2517
Add3	19.769	19.7026	19.7255	19.809	19.8005	19.753	19.4876	19.7809	19.7592	19.8186	19.7997	19.7855	19.6167	19.4019	19.7603	19.6964
Adgra2	15.0416	14.9362	14.8014	15.005	14.9928	15.1028	15.1506	15.1079	14.6445	14.902	14.9288	14.9299	15.1021	15.0264	15.0366	14.9985
Adgrf5	19.3937	19.1414	19.125	19.2773	19.3186	19.1249	19.0809	19.1835	19.3601	19.3948	19.1618	19.2068	18.9278	18.2607	19.0249	18.7757
Adgrl4	15.969	15.9643	16.1801	16.3244	16.2424	16.304	16.063	16.4774	16.4408	16.1963	16.1564	16.2668	16.4616	15.7426	16.1897	15.9474
Adh1	16.1528	15.9563	16.1133	16.0907	16.0033	16.1382	19.4143	15.3557	15.7519	15.678	15.806	15.8883	15.9827	14.5087	16.0062	15.2374
Adh5	20.5978	20.6909	20.5092	20.6343	20.6721	20.663	20.8958	20.697	20.4883	20.4449	20.6038	20.4154	20.388	20.7223	20.5508	20.679
Adi1	15.5235	15.6301	15.7675	15.8398	15.8145	15.6072	15.7822	15.3258	15.7649	15.362	16.048	15.9411	15.5197	16.1	15.42	14.9459
Adipoq	15.5307	15.2426	15.3424	15.6951	15.2383	17.0966	16.3956	16.9629	16.02	15.9831	15.8511	15.817	15.88	13.771	16.0884	15.9596
Adk	19.9355	19.9361	19.8717	19.8354	19.9854	19.5596	20.521	19.1744	19.8752	19.8754	19.8399	19.8881	19.6543	19.2675	19.7338	19.5107
Adnp	16.5623	16.5173	16.4473	16.4861	16.3886	16.4097	16.5095	16.2559	16.4722	16.5311	16.5578	16.5094	16.2895	16.0543	16.3332	16.2773
Ado	14.2028	14.1451	14.2463	14.1233	14.257	14.6049	14.704	14.3266	14.1459	14.0485	14.469	14.3631	14.6396	15.3997	14.4298	14.6612
Adpgk	17.8367	17.3467	17.4758	17.662	17.5006	17.7474	17.3908	17.8274	17.7353	17.5375	17.5844	17.6991	17.5317	17.3553	17.6479	17.7379
Adprh	17.9949	18.0881	18.0094	18.1842	18.0626	18.1769	18.0187	18.1624	18.083	17.8716	17.979	17.9489	18.2822	18.6735	18.1261	18.586
Adprhl2	17.0672	16.9508	16.9185	16.8423	16.9966	16.889	16.4384	16.9223	16.9391	16.8829	16.9276	16.9009	16.9868	17.0391	16.7509	16.8054
Adrb2	13.4479	13.4579	13.5944	13.3943	13.6223	13.5624	13.3263	13.0815	13.4941	13.6165	13.6217	13.6066	13.3344	13.6417	13.8698	14.0199
Adrm1	15.2933	15.1653	15.1061	15.0865	15.1139	15.8878	16.0279	15.6131	15.0257	15.0865	14.9555	14.8354	15.4099	15.8244	15.4611	16.2182
Adsl	18.583	18.6207	18.5691	18.6416	18.5947	18.5374	18.4359	18.605	18.3279	18.4702	18.3965	18.5331	18.502	18.6211	18.4571	18.4144
Adss1	17.9138	17.9734	17.9819	18.0218	17.8291	17.3373	17.7187	17.7201	17.3084	17.7369	18.0345	17.7418	18.1051	18.5904	18.1592	18.4046
Adss2	18.0515	17.8685	17.9208	17.8815	17.9986	17.9916	17.7286	17.8174	18.0013	17.8847	17.9804	17.9307	17.8302	18.2033	17.7667	18.0651
Afap1	15.9594	16.1226	16.0175	15.72	15.8746	15.7019	15.8347	15.7002	15.6232	16.0762	15.7148	15.66	16.0548	16.0567	16.0409	15.7305
Afap1l1	16.9984	16.8949	16.88	16.8588	16.8104	16.7678	16.8444	16.8275	16.9623	16.9289	16.764	16.7391	16.4193	15.5388	16.6056	16.3985
Afap1l2	17.5981	17.5227	17.4374	17.311	17.4105	17.399	17.3018	17.3659	17.2415	17.484	17.264	17.3996	17.6245	16.8713	17.5096	17.5126
Afdn	20.9802	20.8888	20.9346	20.9799	21.013	20.9057	20.7861	20.8564	21.0591	20.9715	20.9206	20.9728	20.425	19.5686	20.5763	20.1738
Afg1l	15.9626	16.1781	16.3858	16.2478	16.0272	15.8366	16.0646	16.2073	16.1252	15.9648	16.0964	16.162	16.4245	16.5573	16.124	16.4646
Afg3l2	18.4948	18.5951	18.7019	18.7004	18.6762	18.6492	18.7291	18.6658	18.4914	18.5182	18.659	18.5913	18.8251	19.2382	18.721	18.9471
Aftph	15.5848	15.3004	15.2157	15.3271	15.2206	14.7447	14.9415	14.968	15.291	15.2943	15.3279	15.3926	15.1059	14.909	15.2012	14.9733
Ag2	12.5733	12.6681	12.623	12.5762	12.6994	12.517	12.4912	12.2391	12.6589	12.6325	12.6645	12.5176	12.7498	12.7465	12.7242	12.8379
Agap3	16.1299	16.1682	16.2726	16.2247	16.2619	16.4834	16.5528	16.294	16.1118	16.0738	16.2834	16.3087	16.8822	17.5085	16.4689	16.7937
Agfg1	18.9894	18.7672	18.6494	18.5714	18.6693	18.7548	18.3605	18.5117	18.7922	18.7827	18.5148	18.7695	18.3733	17.7511	18.5389	18.2352
Agfg2	12.8695	12.9475	12.8143	12.8751	13.0731	12.4487	13.5895	12.8109	13.155	12.9932	13.0081	12.8463	13.5895	13.2803	13.4321	13.5001
Agk	19.162	19.1695	19.1793	19.2313	19.224	19.1793	19.1303	19.1987	19.1593	19.2386	19.2317	19.1363	19.3139	19.6289	19.2958	19.5044
Ago1	17.1231	17.1918	17.1038	17.2446	17.1332	17.0598	16.8127	17.1717	17.1514	17.1654	17.1963	17.1459	17.0923	16.5573	16.9362	17.1042
Ago2	18.3678	18.4922	18.3437	18.452	18.3347	18.2496	18.2163	18.2666	18.4475	18.3635	18.3327	18.3853	18.1955	17.9577	18.4142	18.2535
Ago3	13.4826	13.2742	13.234	13.2946	13.3959	13.6527	13.4334	13.5291	13.4384	13.3799	13.4665	13.4042	13.5165	13.974	13.6236	13.5672
Agpat1	13.7888	13.3703	13.2941	13.2374	13.3844	14.1615	13.5296	13.7456	13.641	13.5828	13.4584	13.5628	14.0713	14.7572	13.6646	14.1493
Agpat2	13.5779	13.6548	13.634	13.6787	13.4569	13.7634	13.8789	13.0064	13.5222	13.6065	13.5876	13.2804	13.4184	12.9997	13.0504	13.4502
Agpat3	18.8392	18.8247	18.8128	18.9071	18.8726	18.7603	18.8446	18.7884	18.7832	18.942	18.8811	18.7185	18.8744	19.424	19.0391	19.0116
Agpat4	16.6548	16.8628	16.8812	17.0403	16.9246	17.0233	17.0378	17.1527	17.0175	16.8866	17.013	16.9857	16.8194	17.4218	16.92	16.7895
Agpat5	15.5043	15.4489	15.2737	15.059	15.1423	15.4296	15.1611	15.2163	14.966	15.9159	15.5462	15.3151	16.011	16.235	15.8954	16.0876
Agps	16.7566	16.6621	16.6721	16.7134	16.7132	16.5666	16.5754	16.4757	16.6909	16.7176	16.6578	16.7658	16.913	16.7476	16.7217	16.879
Agrn	16.333	16.2457	16.3866	16.1015	16.3184	15.8778	15.864	15.8156	16.5231	16.6509	16.4443	16.4815	19.3296	18.6962	19.1973	19.7024
Ahctf1	15.8117	15.6429	15.7345	15.6308	15.6359	15.4234	15.8362	15.5953	15.3078	15.6381	15.3636	15.3803	15.3488	15.3104	15.4523	15.365
Ahcy	21.7931	21.864	21.7608	21.7188	21.7713	21.7477	22.2786	21.5821	21.8125	21.7743	21.7418	21.7549	21.6139	21.4216	21.5643	21.3983
Ahcyl1	20.1126	20.3831	20.2475	20.2533	20.1179	20.7387	21.3658	20.9828	20.0466	20.1685	20.1411	20.2696	20.2727	20.6325	20.3053	20.2822
Ahcyl2	16.2694	16.8739	16.4845	16.1556	16.0157	17.6278	18.5357	18.2206	16.2605	16.6373	16.4179	16.9059	16.5025	16.5598	16.5174	16.2
Ahsa1	18.0747	18.173	18.0998	18.2125	18.1353	18.5445	18.6009	18.4935	17.8942	17.9476	17.9635	17.9537	18.8357	19.2688	18.544	18.9952
Ahsa2	12.934	12.6888	12.735	12.8023	12.8355	13.2404	13.2387	12.9413	13.0714	12.8033	13.0002	12.9791	12.9013	13.4774	12.5268	12.3178
Ahsg	18.7986	18.1798	17.9974	18.0996	18.5826	20.3834	19.5395	18.4872	18.9877	18.3584	18.9594	19.1511	18.7562	18.0155	18.5032	20.4614
Aida	14.7411	14.8598	14.9382	14.9443	14.8746	14.6126	14.7139	14.6773	14.882	14.9064	14.9231	14.8564	14.5692	15.0006	14.851	14.6781
Aif1	11.8523	11.9855	11.8502	11.8216	11.8292	13.0056	12.8429	12.6289	12.1753	11.8712	12.1992	12.0227	12.0363	12.7373	11.8976	12.6163
Aif1l	18.0181	18.3385	18.324	18.2492	18.2777	17.4711	16.9818	17.4603	17.9475	17.981	18.1265	18.1059	17.6153	17.8745	17.6582	17.4261
Aifm1	19.8781	20.0069	19.8936	19.8965	19.8125	19.9595	20.4492	20.2255	19.791	20.0322	19.8534	19.952	19.893	19.9943	19.9955	20.0204
Aifm2	15.4455	15.5178	15.4991	15.5579	15.532	15.7306	15.8239	15.4943	15.4928	15.5463	15.5553	15.3803	15.5157	15.3346	15.5262	15.2469
Aimp1	18.0227	17.9042	17.9947	17.8118	17.9039	18.1091	18.0197	17.7549	17.8431	17.9797	17.8833	17.8364	17.6976	17.8753	17.9042	17.9677
Aimp2	15.7541	15.6436	15.6512	15.578	15.5692	15.7761	15.2342	15.8121	15.6161	15.8274	15.6447	15.9367	16.1774	15.9918	15.9067	16.035
Aip	17.0238	16.8477	16.9604	17.1483	16.8572	17.3414	16.9752	16.836	16.818	18.522	16.8429	16.9228	16.9357	17.0193	16.9964	16.8976
Ak1	18.6582	18.9388	19.0879	19.2248	19.0888	19.4027	19.3114	19.3826	18.4521	18.3866	18.9436	18.953	19.1439	20.1107	19.3187	19.3965
Ak2	19.5703	19.3033	19.3306	19.2436	19.3602	19.5287	20.1828	19.6173	19.4124	19.5071	19.311	19.447	19.2427	18.7049	19.4909	19.3936
Ak3	21.3428	21.312	21.3463	21.2564	21.3901	21.2129	21.1497	21.1591	21.2314	21.3456	21.279	21.322	21.2958	20.9177	21.351	21.3902
Ak4	18.6936	18.4929	18.5696	18.5237	18.5803	18.7684	18.4573	18.5386	18.5479	18.7292	18.5942	18.5973	18.3671	19.0758	18.6467	18.527
Akap10	14.7802	14.7016	14.7792	14.6475	14.8406	14.9624	14.661	14.851	14.8437	14.7988	14.8281	14.9367	14.555	14.2075	14.8508	14.9586
Akap12	20.1562	20.2522	20.3189	20.1837	20.2541	19.9005	19.5241	19.7019	20.2243	20.1441	20.2906	20.1209	20.3101	19.7489	20.2078	20.1335
Akap13	13.9693	13.5768	13.7177	13.7367	13.609	13.5823	13.9941	13.7185	13.8806	13.7229	13.7999	13.627	13.7561	13.5426	13.4079	13.6025
Akap2	20.3566	20.3117	20.3107	20.2058	20.3544	20.2062	19.9238	20.0227	20.1832	20.3205	20.211	20.3403	20.0602	19.2134	20.1175	19.9758
Akap8	17.1869	17.4308	17.1879	17.2595	17.3484	17.3006	17.1169	17.3104	17.2899	17.2655	17.3119	17.2398	16.9291	16.4738	17.2445	16.9427
Akap8l	16.6977	16.6542	16.4456	16.4981	16.3856	16.4777	16.3275	16.4777	16.697	16.6952	16.6033	16.6819	16.2768	16.0203	16.3715	16.3196
Akap9	15.316	15.0124	14.9055	15.0515	15.1858	15.6895	15.4465	15.2025	14.8959	15.0779	14.9047	15.4146	15.9645	16.123	15.1646	15.1454
Akr1a1	21.0833	21.1391	21.1299	21.0575	21.2137	20.9373	21.0492	20.7842	21.0724	21.0233	20.9932	21.0556	20.459	20.2526	20.6116	20.4522
Akr1b1	20.0079	20.0659	20.0601	19.911	20.0663	20.1346	19.9143	19.7979	19.9862	19.9367	20.0498	20.0138	19.9653	20.1858	19.9928	20.0512
Akr1b8	14.7843	15.0542	14.7759	15.1879	14.7525	16.0134	15.0879	15.0257	14.5794	14.8265	14.9605	15.2185	15.548	17.0921	15.3265	15.7172
Akr1c6	11.8351	11.8971	12.0494	12.1101	12.0582	12.9193	17.1765	12.6358	12.0971	12.6823	12.1129	11.9331	12.0323	12.7674	11.9828	12.9596
Akr1e2	16.4864	16.7004	16.5093	16.7408	16.6424	16.7048	16.9748	16.7609	16.3065	16.4101	16.4964	16.3704	16.8166	17.141	16.5657	16.7777
Akr7a2	17.1444	17.1526	17.1529	17.1147	17.0914	17.4	16.6492	17.1282	16.9936	17.0666	17.0974	17.0172	17.3132	17.4561	17.2494	17.3229
Akt1	17.0079	16.9471	16.8413	16.9578	16.9795	17.1078	16.9974	17.0791	16.8557	16.8421	16.6591	16.8374	17.2373	17.3507	16.9498	17.042
Akt1s1	15.4663	15.2798	14.9995	14.9368	15.0941	15.0846	15.2144	15.1781	15.2519	15.2869	15.1699	15.1358	15.1562	14.8764	15.2261	15.1434
Akt3	14.5515	15.0485	15.1513	15.4037	15.0525	14.8331	14.8364	15.2516	15.2705	14.8065	15.1475	14.922	15.035	15.5415	14.8346	15.3521
Aktip	15.8223	15.9252	15.7022	15.7406	15.7536	15.913	15.8221	16.2071	15.7942	15.7632	15.6435	15.5591	16.142	16.2225	15.8713	15.9923
Alad	18.7457	18.6404	18.7427	18.6703	18.7936	18.2425	18.6947	18.3937	19.0513	18.5889	18.7072	18.7435	18.1649	17.4598	18.274	17.9108
Alas1	15.5251	15.4253	15.3278	15.6014	15.4669	15.3577	15.0446	15.4718	15.5516	15.5466	15.4771	15.5552	14.7699	14.2985	15.333	14.6609
Alb	23.4195	23.2756	23.2322	24.0276	23.6891	24.4178	24.0242	23.2819	23.3903	23.4842	23.4324	24.6311	24.8692	25.258	23.9743	23.5845
Alcam	14.1592	14.163	14.1475	14.2458	13.9365	14.2798	14.8435	14.0596	14.105	13.9183	14.0376	14.0963	16.5984	17.0542	16.2336	16.6678
Aldh16a1	12.8973	12.7299	12.7937	12.5777	12.7303	13.2474	13.471	12.942	13.0234	12.8538	13.0092	12.7758	13.0052	13.1618	13.1337	12.988
Aldh18a1	12.5507	12.5594	12.4396	12.481	12.3968	12.7608	13.0915	12.7229	12.639	12.4775	12.7058	12.5368	12.8373	13.6732	12.6435	12.9199
Aldh1a1	22.0395	21.5433	21.5048	21.5076	21.7476	20.9088	21.9318	20.8873	21.7063	21.494	21.3381	21.4927	21.4038	19.7242	21.4188	21.2474
Aldh1a2	14.3483	14.2494	14.0556	13.9174	13.9318	13.5898	12.9597	12.9062	13.9661	14.3426	14.2882	13.7853	15.3369	14.2249	14.4117	15.0429
Aldh1a7	14.9529	14.1223	14.153	13.9563	14.2239	13.6142	15.1495	13.2863	14.2719	14.4002	14.1799	14.19	14.4861	13.7981	14.3376	14.2277
Aldh1l1	16.2094	16.5798	16.4102	16.3311	16.2573	16.6826	19.1471	16.9523	15.8607	16.0047	16.616	16.652	16.8697	17.6159	17.1168	17.2883
Aldh1l2	14.2366	14.7289	14.4426	14.6511	14.0197	13.5798	14.1407	13.8546	14.1972	14.5901	14.6333	14.4054	15.2569	16.0518	15.2393	14.9452
Aldh2	21.9733	21.9742	21.9494	21.8529	21.9524	22.0379	22.323	22.059	21.8672	22.0473	21.8605	22.0054	22.0346	21.3436	22.0932	22.1349
Aldh3a1	17.8866	17.9454	18.0096	17.9767	18.004	18.0538	17.9368	18.0869	18.2284	18.0102	17.9587	17.8937	17.7556	16.7236	17.8085	17.9384
Aldh3a2	20.0842	19.9271	19.9924	19.917	19.8763	20.0136	20.5444	19.9001	19.6904	19.7906	19.788	19.8318	19.9716	19.5785	20.1449	20.1223
Aldh3b1	16.3729	16.293	16.4886	16.4264	16.5107	16.6876	15.2721	16.1529	15.9893	15.9593	16.5371	16.5312	16.6641	18.4352	16.7787	16.9819
Aldh4a1	20.6784	20.6249	20.6966	20.59	20.7222	20.8606	20.9808	20.7204	20.6862	20.7018	20.6206	20.6761	20.3135	19.8205	20.7207	20.6972
Aldh5a1	19.9799	19.7873	19.5933	19.6598	19.5884	20.0349	20.2587	19.689	19.055	20.2451	19.68	19.5604	20.2862	21.6034	20.2426	20.1785
Aldh6a1	20.3915	20.3117	20.178	20.1237	20.0954	20.3887	20.8818	20.4425	19.8604	20.6416	20.1315	20.2349	20.6153	20.7359	20.6241	20.5847
Aldh7a1	19.6566	19.7506	19.5743	19.671	19.4798	19.7831	19.8593	19.5534	19.2451	19.727	19.4954	19.8061	20.2084	20.4764	19.9452	19.9391
Aldh9a1	20.9229	20.9731	21.042	20.9454	21.0707	20.8421	20.6903	20.5818	21.0762	20.9815	21.0487	21.1042	20.6116	20.2282	20.7644	20.6673
Aldoa	22.5863	22.6304	22.7013	22.459	22.7581	23.2481	23.3302	22.8755	22.4731	22.3587	22.679	22.6863	22.9205	24.1479	22.798	23.1617
Aldob	16.2571	15.8808	16.1413	16.2099	16.1045	15.7647	22.3121	15.8311	15.793	15.7257	15.6218	15.9503	16.0423	16.4838	15.9611	16.0022
Aldoc	17.5858	17.7305	18.1501	17.9938	18.2895	18.7353	18.4146	18.2403	17.5722	17.201	18.7246	18.5139	18.9658	20.1147	18.8599	19.0799
Alg1	14.5868	14.7063	14.5337	14.8509	14.7623	14.5209	13.2291	14.731	14.6298	14.6688	14.5405	14.6885	14.5345	14.5416	14.7728	14.5361
Alg14	12.6839	12.7025	12.9426	12.9401	12.8737	13.3533	13.4924	13.1482	12.7227	12.5703	12.7601	12.5314	12.34	12.6954	12.8492	12.7982
Alg2	16.9801	16.9237	16.7142	16.9763	16.8761	16.9113	17.4166	17.3306	16.5692	16.9694	16.8441	16.7712	17.1689	17.6357	17.3541	17.3846
Alg3	14.897	14.6855	14.6734	14.7058	14.702	15.302	15.1209	15.2594	14.6145	14.8078	15.0367	14.8891	14.4386	16.2397	14.9485	14.4546
Alg5	16.701	16.3601	16.407	16.3005	16.3527	16.2435	16.3913	16.8528	16.491	16.3378	16.3499	16.3163	15.8785	16.0238	16.3207	16.4573
Alkbh5	12.7475	12.7249	12.7436	12.7513	12.8249	13.1679	13.0855	13.0721	13.0118	12.8685	13.0378	12.9717	13.2601	13.8341	12.8645	12.779
Alox12	17.1328	17.0859	16.9185	16.9967	17.0584	17.138	16.7422	17.0795	16.8935	17.504	16.7406	17.2183	18.486	17.3238	18.5476	19.4026
Alox5	12.7362	12.5567	12.3273	12.5147	12.3254	12.3336	12.4196	12.154	12.3221	12.3094	12.6229	12.2682	12.7119	12.8162	12.5206	12.5578
Alpl	21.8864	22.0303	21.8221	21.8557	21.9641	22.0782	21.8549	21.6431	21.4261	22.0129	21.7211	21.8094	21.783	21.2256	21.7072	21.7674
Als2	15.145	14.965	15.166	15.169	15.3037	15.171	15.2348	15.3107	15.1693	15.1931	15.3212	15.2037	15.0731	15.1769	15.0391	15.1548
Als2cl	11.9794	12.006	12.1212	11.8369	12.0028	12.3434	12.425	12.237	12.1761	12.0238	12.2606	11.8852	12.0641	12.892	12.1625	12.1129
Alyref	19.0341	18.8248	18.7572	18.7533	18.9639	18.5256	18.513	18.7102	18.8336	19.0595	18.7583	18.6769	18.5854	17.8551	18.8086	18.3982
Amacr	14.6464	14.6883	14.5112	14.8295	14.7735	14.8635	14.7096	14.7514	14.7096	14.6872	14.7359	14.7826	14.6276	14.7956	14.7415	14.7247
Amdhd2	16.1796	16.1525	16.8244	16.4082	16.1368	15.8683	15.4654	15.845	16.3019	16.1268	16.1187	16.2693	16.2726	15.8751	16.0691	16.0455
Amfr	12.3464	12.1254	12.1406	12.0286	12.3288	12.5569	12.4518	12.2227	12.3133	12.2942	12.3303	12.3401	12.2329	12.7352	11.9494	12.0171
Amot	17.0002	16.8466	17.007	16.8777	16.9244	16.6768	16.8346	16.9773	17.049	16.9827	17.0145	16.9679	16.4259	16.157	16.7953	16.3372
Amotl1	14.6447	14.658	14.6176	14.5449	13.9893	15.0527	13.3984	13.852	14.6741	14.4726	14.2878	14.1266	13.3073	13.9347	14.2252	13.3887
Ampd2	13.6769	13.8017	13.6973	13.8593	13.8265	14.0896	13.967	13.9238	13.7513	13.6702	13.816	13.6731	14.0039	14.4596	13.8461	13.9193
Ampd3	17.2726	17.3964	17.5423	17.5776	17.5681	17.1498	16.8503	17.3184	17.5982	17.2977	17.4942	17.4086	17.3751	17.7135	17.4305	17.4007
Amph	15.7815	16.0452	16.747	16.5441	17.0531	17.2041	17.1348	16.4773	15.949	15.7066	17.0136	16.6142	17.5115	19.2373	17.0747	17.7858
Amt	15.0109	14.9802	14.9341	14.9	14.8975	14.8637	15.2918	14.611	14.3477	14.9483	14.6684	14.6763	15.0461	15.3658	14.9508	15.2447
Amy2	14.0675	13.9356	13.5233	13.9425	13.0869	13.1169	16.2788	12.7051	12.721	12.6698	12.9673	12.8455	12.9955	13.3168	12.5715	12.8976
Anapc1	16.8003	16.6415	16.7563	16.7824	16.6269	17.0873	16.4074	16.7295	16.9849	17.1545	16.7808	16.9199	17.5051	17.4995	16.8543	16.867
Anapc4	14.1892	14.3125	14.1727	14.5729	14.2866	14.0464	14.1536	14.3325	14.4782	14.2669	14.2765	13.9918	14.3747	14.6888	14.4606	14.7188
Anapc5	14.9061	14.6629	14.859	14.8314	14.8121	14.9358	14.8774	14.9503	14.8815	14.7878	14.8156	14.7808	14.8703	15.298	14.8983	14.7972
Anapc7	14.5963	14.7033	14.9441	14.7877	14.7241	14.8529	14.6595	14.718	14.6528	14.5217	14.5543	14.5825	14.38	14.2323	14.4736	14.8929
Ank1	20.2396	20.0399	20.0229	20.0436	20.1576	19.4693	19.4929	19.5732	20.0494	20.0702	20.0865	20.0692	19.9093	20.1815	19.9572	20.0896
Ank2	15.0684	15.4531	15.5282	15.6645	15.6577	15.8686	16.1007	15.7449	15.0228	14.7878	15.8572	15.488	16.638	18.1942	16.34	16.7541
Ankfy1	18.8712	18.8508	18.956	18.8839	18.9085	18.9058	18.5709	18.8484	18.9175	18.7387	18.722	18.8059	18.5751	18.4174	18.7634	18.5851
Ankle2	14.795	14.9866	14.9213	14.8676	14.7704	14.8107	14.7727	14.8934	14.8753	15.0135	14.9795	14.9505	14.6295	14.7156	14.7748	14.7807
Ankmy2	12.7446	12.7205	12.8358	13.0052	12.9804	13.2867	13.0412	13.0857	13.0024	12.7632	12.8467	12.9736	13.0534	13.0728	12.8112	12.8858
Ankrd13a	17.5739	17.6334	17.5568	17.6017	17.6032	17.5311	17.4814	17.7109	17.5742	17.6108	17.464	17.6316	17.2136	17.1973	17.4624	17.358
Ankrd17	15.6428	15.6816	15.5713	15.4548	15.5458	15.5004	15.8033	15.772	15.6394	15.6915	15.635	15.672	15.3773	14.8623	15.6068	15.3934
Ankrd44	15.1402	15.4803	15.3243	15.2319	15.3537	15.1006	14.766	15.1997	15.1851	15.275	15.3079	15.4171	15.3254	13.9513	15.2224	15.3133
Anks1a	17.6091	17.4733	17.5174	17.6091	17.576	17.5051	17.4423	17.5437	17.7191	17.6048	17.5463	17.607	17.3306	16.3875	17.3541	17.1382
Anks1b	13.5985	13.6826	13.7097	13.7348	13.5732	13.8636	13.7079	13.7559	13.9534	13.5797	13.6074	13.5092	17.0769	17.4042	15.6005	16.4856
Anln	16.0546	16.5046	17.4682	16.8578	17.3136	17.746	18.0183	16.9095	16.3794	15.0345	17.4023	17.2303	16.9687	19.8511	17.2579	17.5363
Ano1	18.2285	18.3917	18.1837	18.1144	18.1244	17.3181	17.2742	17.4254	17.5277	18.1565	17.8618	17.6939	18.449	17.8187	18.5108	18.6977
Ano10	17.7449	17.7414	17.6379	17.6893	17.7111	17.6872	17.8354	17.7834	17.6698	17.7958	17.6952	17.6032	17.9155	17.6123	18.0502	17.9826
Ano6	17.5186	17.4347	17.4704	17.469	17.3057	17.3683	17.0521	17.4926	17.4405	17.4176	17.403	17.3556	17.3519	16.6921	17.4155	17.4895
Anp32a	20.1645	20.1214	20.0836	20.0217	20.2818	20.0266	19.7736	19.928	20.3415	20.1355	20.1231	20.1885	19.7712	18.9843	19.7502	19.5483
Anp32b	18.8145	18.657	18.6161	18.6276	18.6219	18.6852	18.6644	18.7008	18.87	18.7301	18.5981	18.6883	18.4627	18.3833	18.6376	18.3278
Anp32e	19.4104	19.4537	19.4036	19.4639	19.4899	19.3644	19.4081	19.5542	19.4675	19.3846	19.5373	19.5037	19.0435	18.596	19.2909	19.0311
Anpep	19.5684	19.6313	19.5686	19.4126	19.4902	17.966	18.0396	18.4346	19.4892	19.5319	19.4141	19.4227	20.6513	19.2983	20.5385	20.8135
Anxa1	20.4962	20.4891	20.2223	20.4427	20.3642	20.5096	20.8219	20.758	20.3007	20.3808	20.2026	20.0954	20.7723	20.9723	20.6574	20.6181
Anxa11	19.4181	19.5741	19.5148	19.5541	19.5296	19.4942	18.9882	19.6464	19.5497	19.4494	19.3313	19.4023	19.347	18.836	19.4995	19.3746
Anxa2	22.2064	21.9721	21.9446	22.0093	22.0306	22.0684	21.7435	22.1845	22.358	22.0279	21.9297	21.7546	21.971	21.3765	21.9305	22.0548
Anxa3	21.3391	21.3739	21.3349	21.3421	21.5533	21.1897	20.7672	21.1069	21.5624	21.3975	21.4003	21.4001	20.735	20.1672	20.9202	20.6633
Anxa4	19.9581	19.8896	19.9348	20.0727	20.0377	19.6829	19.5659	19.7748	20.1042	19.829	19.8713	19.8867	19.4935	18.7034	19.6776	19.4424
Anxa5	22.9677	23.0489	22.9566	23.0145	23.1109	22.9781	22.3968	22.8092	22.9292	22.9747	22.9069	22.8755	22.8591	22.5926	22.9197	22.8092
Anxa6	21.9712	22.1631	22.1017	22.1341	22.1612	22.0152	22.2105	21.9701	21.9824	21.962	21.8902	21.9009	22.1243	21.9247	22.1514	22.2804
Anxa7	19.3743	19.3758	19.4023	19.3436	19.3205	19.4644	19.3988	19.4278	19.5762	19.3602	19.3527	19.3343	19.314	18.852	19.3566	19.3833
Aoc3	20.8235	20.9671	20.7889	20.6554	20.6524	20.1769	19.5373	19.9774	20.0099	20.9803	20.4854	20.3306	22.1492	22.1052	21.9571	22.2946
Ap1b1	20.1608	20.1095	20.0778	20.0193	20.1803	20.3673	20.2763	20.223	20.1626	20.0824	20.0674	20.2026	20.2647	20.3496	20.1587	20.2451
Ap1g1	19.2633	19.3741	19.3845	19.3876	19.4161	19.4041	19.3122	19.5251	19.5857	19.3404	19.3695	19.4904	19.7235	19.5561	19.4275	19.6616
Ap1g2	11.853	11.7732	11.7655	11.8745	11.8016	12.4943	12.9663	12.6587	12.0802	11.8004	12.0538	11.9161	12.9923	13.1311	11.8227	12.8547
Ap1m1	18.7966	18.921	18.9229	18.8846	18.9377	19.2387	19.1992	19.1819	18.9054	18.7532	18.7532	18.7981	18.699	18.5175	18.7945	18.7407
Ap1s2	16.4156	16.3481	16.1847	16.275	16.22	16.8992	16.7093	16.9656	16.3731	16.1371	16.1205	16.3207	16.1855	15.8273	16.1683	16.5771
Ap2a1	21.4132	21.5022	21.5384	21.5176	21.5733	21.5021	21.3897	21.6	21.6778	21.406	21.5102	21.5602	21.6806	22.0475	21.5284	21.5821
Ap2a2	21.2767	21.2783	21.4328	21.5036	21.4215	21.2709	21.1173	21.257	21.6171	21.366	21.4052	21.5149	21.3678	21.5307	21.2222	21.2973
Ap2b1	22.3519	22.3268	22.2772	22.3451	22.4296	22.492	22.228	22.343	22.4248	22.3265	22.322	22.4236	22.3796	22.7129	22.3302	22.2773
Ap2m1	21.7123	21.8024	21.7767	21.9599	21.898	21.8681	21.8816	21.9541	22.0459	22.0222	21.7906	21.8688	22.0823	22.3072	21.985	22.3352
Ap2s1	18.5933	18.7254	18.5931	18.8774	18.7659	18.8366	18.6743	18.7094	18.7143	18.4567	18.5563	18.4682	18.9058	18.9875	18.6738	18.7988
Ap3b1	19.0473	19.1147	19.053	19.1217	19.1799	18.8711	19.1064	19.2142	19.2918	19.0694	19.125	19.1003	18.9256	18.1634	18.8325	18.8139
Ap3b2	12.9213	13.2762	13.2876	13.3012	13.5072	13.5886	14.8826	12.8321	13.4555	12.5211	13.6841	13.2737	15.3427	16.1591	14.3936	15.7966
Ap3d1	19.1323	19.167	19.0701	19.0946	19.1217	19.0018	19.1884	19.1317	19.1401	19.0104	19.1665	19.0807	19.2361	19.3992	19.1181	19.3145
Ap3m1	17.1454	17.1851	17.2163	17.0253	17.1314	17.5546	17.1885	17.3031	17.1971	17.1676	17.0403	17.1512	16.9413	16.5906	17.2411	16.9629
Ap3m2	13.4557	13.3925	13.3368	13.1708	13.2366	13.7087	13.4823	13.3674	13.2331	13.3133	13.4321	13.298	14.2142	14.6364	13.6937	13.8802
Ap3s1	18.0571	17.9567	18.0132	18.066	17.9786	18.0102	17.9459	18.22	18.3246	17.9451	17.8938	18.1145	18.2494	18.3171	18.042	18.1231
Ap3s2	15.3835	15.7329	15.4309	15.8611	15.4409	15.5505	15.6132	15.4815	15.7908	15.2536	15.4864	15.3054	16.942	17.3742	16.3563	16.5242
Apba1	13.5536	13.4965	13.2127	13.1486	13.2015	13.6978	13.7324	13.4611	13.0085	13.4076	13.2221	13.3034	14.1766	14.7035	13.8436	14.304
Apbb1	13.2665	13.1418	13.3379	13.8251	13.6623	13.1772	13.1509	13.0078	13.3629	13.2425	13.6489	13.5709	13.8742	13.2438	12.6683	13.0012
Apbb2	15.7487	15.6224	15.5625	15.506	15.674	15.7766	15.4572	15.563	15.6698	15.6149	15.5582	15.5356	14.9251	14.6458	15.5078	15.3452
Apeh	19.3753	19.3194	19.2402	19.3601	19.254	19.4491	19.0371	19.1866	19.252	19.4451	19.1221	19.3072	19.2264	18.9131	19.2377	19.2753
Apex1	17.2433	17.0354	16.9964	16.9958	17.0142	17.3565	17.388	17.4507	17.0992	17.219	17.0465	17.0636	17.2321	17.182	17.5102	17.3183
Api5	18.9504	19.0703	18.9707	18.8839	18.9805	18.8436	18.6537	18.7743	19.1018	18.9999	19.0466	19.086	18.9069	18.6718	18.874	18.8605
Apip	18.475	18.4846	18.5666	18.5668	18.5416	18.7155	18.6559	18.5861	18.5655	18.5129	18.5053	18.6296	18.2124	17.7453	18.3039	18.1109
Aplp1	12.0285	12.1379	12.0725	12.2057	12.1868	12.2993	12.416	12.2252	12.3394	11.8342	12.3586	12.306	12.071	13.2919	12.2965	12.0913
Aplp2	17.2859	17.2925	17.4529	17.4303	17.3429	17.3409	17.02	17.3486	17.4946	17.3753	17.4376	17.5896	17.4993	17.5934	17.3645	17.4211
Apmap	19.3235	19.22	19.195	19.2952	19.2951	19.4837	19.6712	19.5327	19.2327	19.3363	19.1898	19.2114	19.4814	18.7603	19.4043	19.5396
Apoa1	19.5721	19.4368	19.5511	19.7184	19.7181	21.048	20.8929	20.082	19.6174	19.5712	19.7169	20.03	20.7218	21.6401	20.2288	20.5805
Apoa4	16.4823	16.2442	16.4806	16.4687	16.3919	16.6249	17.7518	16.6071	16.6777	16.5451	16.719	16.6458	16.2855	14.9884	16.2325	16.3169
Apob	14.7548	14.4807	14.8051	14.7396	14.716	14.8482	15.2291	14.4911	14.5904	14.5577	14.331	14.5617	13.5184	14.3755	14.6836	14.5189
Apoc1	15.4092	15.4911	16.2074	15.6157	15.6635	15.1374	15.618	15.2112	15.8466	15.4637	15.7072	15.5439	15.7815	14.8513	15.2536	15.5541
Apod	16.6949	16.758	16.8735	16.7787	16.8896	16.3177	16.2722	16.602	17.0247	16.5444	17.0459	16.4874	17.5045	17.8788	17.3282	17.865
Apoe	17.5197	17.5317	17.5795	17.6541	17.4621	17.5819	18.0364	17.5653	17.7713	17.6506	17.4692	17.5756	17.6486	17.9592	17.7908	17.8123
Apoh	14.6987	14.42	14.4966	14.6155	14.5314	15.3101	15.0169	14.2406	14.4965	14.4357	14.4519	14.8872	15.2025	15.1507	15.1524	14.9086
Apoo	16.46	16.5568	16.4649	16.6093	16.2953	16.7529	17.1007	16.9082	16.248	16.5453	16.3972	16.5327	17.2214	17.7217	16.994	16.8571
Apool	18.377	18.3808	18.3576	18.492	18.3286	18.4134	18.3506	18.4985	18.4933	18.4212	18.3767	18.3622	18.3315	18.0119	18.4115	18.4637
App	18.2436	18.3234	18.3523	18.221	18.2696	18.4232	18.3638	18.4203	18.4326	18.2169	18.3368	18.4536	18.1027	18.3844	18.1381	18.2507
Appl1	19.2967	19.2027	19.1655	19.2294	19.2396	19.3003	19.0296	19.0641	19.1632	19.2389	19.1017	19.209	18.9486	18.959	18.9798	18.9145
Appl2	12.6327	12.3578	11.937	12.4509	12.065	12.6261	12.556	12.3911	12.4398	12.3177	12.5567	12.4396	12.4767	12.8528	12.0996	12.4534
Aprt	14.9771	15.0046	14.9044	15.0076	14.9167	14.7804	14.7664	15.0429	15.5606	14.7269	15.1616	14.8815	15.1031	15.2053	14.9856	14.8607
Aqp1	12.9829	13.0344	13.0462	12.9583	12.9002	13.8438	14.2437	14.1054	12.8588	13.2756	13.2611	13.3667	12.6352	12.9306	12.6247	12.8438
Aqp4	16.6898	16.4522	16.5272	16.7315	16.6416	16.1427	15.9496	15.8449	16.7875	16.5633	17.0337	16.9506	19.1014	18.5152	18.9699	19.151
Aqr	15.6244	15.6322	15.6577	15.7341	15.5363	15.4846	15.2089	15.5201	15.6737	15.532	15.673	15.6546	15.4699	15.0038	15.672	15.6853
Araf	17.7382	17.7311	17.8715	17.907	17.8169	17.8121	17.9696	18.063	17.684	17.697	17.8508	17.6871	17.6323	18.2897	17.8071	18.0071
Arap1	13.4278	13.5261	13.6091	13.4722	13.4588	13.5749	13.6871	13.5219	13.2954	13.6525	13.7165	13.3083	14.1376	13.726	14.0272	14.2493
Arap3	17.5258	17.3976	17.4811	17.5764	17.3863	17.4746	17.3288	17.5556	17.5799	17.4672	17.5735	17.4915	17.3592	17.1172	17.384	17.4656
Arcn1	20.1831	20.2173	20.1738	20.2124	20.219	20.2676	20.3852	20.3848	20.1922	20.1437	20.115	20.133	20.2963	19.9866	20.1747	20.1741
Arf2	21.4516	21.7026	21.614	21.8651	21.7294	21.725	21.5025	21.7412	21.7513	21.557	21.6484	21.6897	22.354	22.7687	22.0396	22.3933
Arf4	18.1615	18.2525	18.123	18.1992	18.1666	18.5288	18.6288	18.4372	18.4353	18.2729	18.3107	18.3026	18.4645	18.2284	18.2401	18.2305
Arf5	19.7804	19.8675	19.8087	19.9613	19.954	19.8677	19.1491	19.9029	20.0794	19.888	19.7532	19.9002	20.9444	21.0807	20.3125	20.9172
Arf6	19.6131	19.8769	19.8359	20.0283	20.1117	19.5423	19.4814	19.8159	20.0537	19.8352	20.0028	19.9947	19.6165	19.3157	19.6052	19.5851
Arfgap1	15.9965	15.904	15.9434	15.9576	16.0753	16.116	15.5469	16.0175	16.0242	15.886	16.0339	15.8914	16.0375	16.6968	15.9713	16.0325
Arfgap2	16.4186	16.2056	15.9822	16.1222	16.3229	16.6646	16.4268	16.0748	16.0852	16.3451	16.0901	16.1306	16.2866	15.9085	16.5353	16.2179
Arfgap3	15.8052	15.6459	15.5804	15.6882	15.726	15.7783	16.0715	15.8534	15.6514	15.8309	15.4942	15.583	15.6408	15.7146	15.5642	15.872
Arfgef1	16.4515	16.5505	16.469	16.4505	16.4721	16.4566	16.597	16.8581	16.5331	16.3771	16.498	16.5414	16.4038	16.1249	16.2462	16.277
Arfgef2	16.7276	16.8174	16.8353	16.6651	16.7613	17.1026	16.684	17.0652	16.7605	16.8395	16.7984	16.8896	16.4512	16.6008	16.4701	16.3498
Arfip2	13.4224	13.2983	13.1161	12.946	13.2141	13.8134	12.8467	13.5079	13.4691	13.3134	13.3426	13.6704	13.8963	14.2	13.8107	13.933
Arfrp1	14.6522	14.7045	14.9176	14.9534	14.8175	14.7944	14.5334	14.9099	15.0514	15.0314	14.8502	15.1479	14.6776	14.6243	14.7103	14.6784
Arg1	12.5029	12.3696	12.4971	12.6184	12.3047	12.2657	14.296	12.1444	12.2118	12.0193	12.2173	12.0767	12.2315	13.508	11.9628	12.0829
Arglu1	14.1976	14.1882	14.2366	14.2116	14.2278	14.1972	14.3018	14.3649	14.3998	14.2836	14.2926	14.2515	13.7266	13.8945	13.9131	13.6002
Arhgap1	20.2057	20.3014	20.2602	20.1193	20.2244	20.065	19.553	19.7707	19.9555	20.1883	20.0626	20.1261	20.3271	20.0459	20.3216	20.3635
Arhgap10	14.2853	14.3836	14.149	14.1278	14.0667	14.0242	13.0356	14.1045	13.8723	14.2952	14.0247	13.8949	14.6013	14.6478	14.4573	14.8215
Arhgap12	15.1034	15.2846	15.3711	15.4754	15.3853	15.6117	15.5307	15.5786	15.3153	14.9687	15.3639	15.3483	15.6039	15.3823	15.4395	15.9961
Arhgap17	18.3306	18.2505	18.3554	18.2948	18.3645	18.3127	18.2004	18.3652	18.027	18.2091	18.182	18.1281	18.1578	17.7975	18.1837	17.9301
Arhgap18	16.2947	16.4404	16.4763	16.3793	16.4452	16.633	16.4958	16.7901	16.726	16.7513	16.5902	16.7597	17.1606	16.6314	16.7734	17.3164
Arhgap25	17.2156	17.1145	17.1234	17.2133	17.3116	17.0829	16.9185	17.191	17.3741	17.0971	17.253	17.1993	16.7039	15.7001	17.218	17.1216
Arhgap26	15.2842	14.9418	15.078	15.178	15.0141	15.1205	15.0584	14.7687	15.345	15.1078	15.1753	15.3167	14.6296	15.0064	14.9166	14.7049
Arhgap27	12.525	12.5511	12.3664	12.4639	12.043	12.4234	12.6779	12.4666	12.5816	12.0348	12.7288	12.1328	12.6363	12.8723	12.2065	12.5671
Arhgap29	16.825	16.874	16.9529	17.0142	16.8487	16.97	16.815	16.8918	16.873	16.8553	16.884	16.8525	16.7553	16.4208	16.6924	16.3822
Arhgap31	18.1978	17.9232	18.0458	17.921	18.088	18.0864	17.8215	17.8693	18.12	18.1636	17.9952	18.1247	17.7314	17.1886	17.7831	17.4956
Arhgap42	15.2528	15.2497	15.1938	15.3392	14.97	14.6124	14.888	14.7302	14.989	15.1596	14.8853	15.0876	15.3775	14.8592	14.9246	14.7733
Arhgap5	15.2631	15.3417	15.3689	15.5521	15.3274	15.3076	15.2918	15.2943	15.2178	15.3124	15.5423	15.3411	15.5509	15.919	15.5282	15.511
Arhgap6	14.0675	14.1813	13.8034	13.8406	13.6909	13.3251	13.4102	13.3987	13.6915	14.2724	13.7204	13.6812	14.503	14.1844	14.603	14.8753
Arhgdia	21.0729	21.1321	21.0037	21.0958	21.1471	20.9777	21.0424	20.9378	21.1104	21.0408	20.9191	21.0121	20.8354	20.8836	20.7868	20.8962
Arhgdib	19.4227	19.3432	19.182	19.2139	19.2912	19.0655	18.9743	19.085	18.717	19.3198	19.1162	19.0523	19.65	18.9579	19.7811	20.2413
Arhgef1	18.4717	18.3416	18.459	18.4505	18.4843	18.4335	18.3071	18.5061	18.5154	18.46	18.376	18.2911	18.0404	17.2385	18.2925	18.1926
Arhgef10	14.4453	14.4514	14.5826	14.7024	14.7148	14.9458	14.4418	14.6416	14.4363	14.4229	14.4433	14.5922	14.2483	15.2701	14.2638	14.1757
Arhgef12	17.8488	17.9524	17.9645	17.8678	17.9415	18.1525	17.9554	18.1959	17.9881	17.9409	17.9415	17.8634	17.8503	17.861	17.8391	17.9586
Arhgef15	15.896	15.6763	15.8394	15.832	15.9115	15.9615	15.228	15.5947	15.9455	15.8134	15.9563	15.9124	15.2734	13.9476	15.461	15.0544
Arhgef17	15.8687	16.1408	15.9711	15.872	15.7328	15.447	14.7392	15.4445	15.3977	15.8657	15.8438	15.6652	16.065	15.8237	16.0676	15.9898
Arhgef18	14.6518	14.5892	14.7295	14.7999	14.673	14.0468	14.2413	14.5334	14.6541	14.7616	14.9442	14.8928	14.5854	14.9647	14.5522	14.7674
Arhgef2	19.4711	19.2943	19.3188	19.291	19.4284	19.3006	18.9375	19.2618	19.4476	19.349	19.404	19.4103	19.2801	19.0782	19.2674	19.0754
Arhgef40	14.6179	14.3	14.4627	15.6688	14.5459	16.4383	13.8475	14.1678	14.4927	14.7641	14.6152	16.4805	16.9684	17.6109	15.7439	15.4386
Arhgef6	14.3151	14.4438	14.3796	14.5164	14.2971	13.5166	13.5032	13.8753	14.1867	14.1415	14.1878	14.2284	13.8677	13.7829	14.22	13.9383
Arhgef7	18.5303	18.5212	18.6542	18.6331	18.569	18.4565	18.3549	18.8003	18.5396	18.5139	18.4499	18.3886	18.354	18.2478	18.4922	18.5553
Arhgef9	12.8552	12.6271	12.7873	12.7687	12.7167	12.6257	12.7494	12.5286	13.0449	12.7045	12.8267	13.0073	14.4901	14.6608	13.4646	14.0761
Arid1a	16.9593	16.9403	16.8781	17.1298	16.858	15.9654	16.4047	16.668	16.8073	17.0525	16.9148	17.1358	16.9959	16.3162	16.8439	16.6085
Arid1b	12.9784	12.7905	12.9242	12.6876	12.8547	13.1894	13.0785	13.1031	13.0109	12.927	13.0723	12.9797	12.7375	13.1004	12.7816	12.944
Arid4a	12.5997	12.6902	12.7715	12.8766	12.7515	12.9139	12.9449	12.7702	12.8847	12.6769	12.8123	13.0048	12.6015	13.1477	12.4621	12.9524
Arih1	16.2206	16.2556	16.458	16.521	16.4229	15.8951	15.2076	15.8317	16.5005	16.374	16.3787	16.6727	15.9164	16.2893	16.1489	15.8306
Arih2	14.0173	14.2901	14.0767	14.2199	13.9709	13.6881	14.2113	14.2522	14.0808	14.1591	14.3223	14.0769	14.2926	13.7083	14.0196	14.3011
Arl1	16.8021	17.0683	16.8745	17.0465	17.0153	16.5345	13.9846	16.8788	16.8059	16.8625	16.9545	16.9977	17.216	17.5647	17.1891	17.3545
Arl15	17.9274	17.8052	17.8006	17.7724	17.9117	17.9102	17.8679	17.9527	17.7507	18.1083	17.7183	17.4767	17.6185	16.8676	17.8608	17.6165
Arl2	17.4654	17.4193	17.5674	17.6075	17.4681	17.6327	17.7622	17.6239	17.5383	17.3898	17.5378	17.4519	17.1978	17.8438	17.3445	17.4548
Arl2bp	13.0995	12.9115	12.6113	12.9941	12.9463	13.1003	13.3995	13.5476	12.7594	12.9865	12.7437	12.5122	13.426	13.5053	13.2817	13.3066
Arl3	17.7352	17.8196	17.6092	17.7525	17.7647	17.5599	17.7169	17.5757	17.6119	17.5054	17.6483	17.7416	17.9811	18.3612	17.6704	17.8471
Arl6	16.649	16.8743	16.8944	17.8231	17.0884	16.9961	17.3802	17.299	16.8222	18.8102	16.7143	16.9194	18.4251	17.4026	16.8174	17.0292
Arl6ip1	16.3858	16.34	16.3024	16.5316	16.3553	16.5547	16.6987	16.6541	16.3127	15.927	15.9657	16.0471	15.2883	15.0369	15.8352	16.1156
Arl6ip5	18.4809	18.1344	18.0806	18.0516	18.2576	18.5021	18.3011	18.2887	18.3757	18.5542	18.0976	18.1024	18.2671	17.3864	18.2712	18.1303
Arl8a	18.6781	18.7669	18.7119	18.6951	18.7545	18.9961	17.7843	18.8701	18.6521	18.8225	18.5078	18.7315	19.0434	19.3396	18.8847	19.083
Arl8b	18.8854	18.8124	18.8779	18.8684	18.925	18.9974	18.6746	18.6831	18.9401	18.7827	18.9154	18.9115	19.0051	19.0932	18.8303	18.848
Armc1	16.5285	16.7459	16.9359	16.9088	16.8172	16.3244	16.6073	16.8532	16.9447	16.8761	16.8864	16.8614	16.6931	16.7142	16.643	16.6277
Armc10	18.4047	18.2932	18.2542	18.2819	18.2578	18.1257	18.288	18.3348	18.3624	18.4177	18.4253	18.4805	18.5197	18.3208	18.3276	18.4149
Armc6	14.477	14.2156	14.384	14.5083	14.6593	14.7497	14.5968	14.4385	14.4145	14.613	14.551	14.4516	14.935	14.745	14.5021	14.9382
Armc8	16.4219	16.2153	16.2365	16.0869	16.4644	16.201	16.2144	16.2673	16.3613	16.1504	16.2652	16.4773	16.2467	16.0525	16.2805	16.3348
Armcx3	13.9056	13.3041	13.966	13.7641	13.3882	13.141	12.7113	13.4638	13.9449	13.7994	13.4157	13.8302	12.8333	13.9387	13.8404	13.3001
Armh3	15.599	15.5606	15.5136	15.5041	15.6381	15.8477	15.6415	15.4722	15.5931	15.5954	15.4537	15.4462	15.8375	16.172	15.7627	16.0102
Armt1	12.8736	12.9913	12.9343	12.6942	12.9491	12.8191	13.0587	13.2755	12.6903	12.7735	12.8586	13.1568	13.165	14.7858	12.9671	12.8629
Arntl	13.6813	13.7018	13.7358	13.7251	13.7369	13.8404	13.8269	13.7787	14.0949	13.7745	13.8477	13.7312	13.434	13.7136	13.5923	13.5409
Arpc1a	18.9325	19.0346	18.8464	18.8386	18.8031	18.8465	18.753	18.723	18.6312	18.9102	18.6803	18.8046	19.4606	19.9146	19.4946	19.7624
Arpc1b	19.8618	19.9	19.8218	19.9921	19.9605	19.7622	19.6439	19.8715	20.0713	19.9838	19.809	19.8387	19.8214	18.914	19.7866	19.9759
Arpc2	21.0047	21.0315	20.9139	21.1118	21.0038	21.196	20.9654	21.1252	21.0148	21.0048	20.8467	20.7644	21.2222	21.0217	21.161	21.4083
Arpc3	18.2935	18.3851	18.4243	18.2035	18.2968	17.9033	17.9642	18.1955	18.3645	18.26	18.2405	18.1617	18.8212	18.4846	18.2248	18.4457
Arpc4	20.4564	20.5303	20.6361	20.6356	20.6153	20.3658	20.3236	20.4638	20.596	20.5098	20.5777	20.4503	20.4018	19.9275	20.5235	20.6621
Arpc5	19.4775	19.3484	19.3792	19.3547	19.3505	19.3752	19.428	19.3537	19.3509	19.38	19.2578	19.218	19.3765	19.1978	19.4477	19.6334
Arpc5l	16.6483	16.6977	16.6508	16.7997	16.8883	16.5547	16.6538	16.476	16.7888	16.6815	16.6501	16.5973	16.295	16.7063	16.6623	16.5279
Arpin	17.2854	17.1705	17.0062	17.0087	17.1548	17.2447	17.2121	17.1332	16.9486	17.1225	16.8911	17.0084	17.0964	17.1443	16.9651	17.0515
Arrb1	16.7167	16.8126	16.8954	16.917	16.7608	17.0592	16.8948	16.8567	16.9603	16.933	16.8741	17.4921	17.3089	17.4944	17.155	17.505
Arrb2	12.0768	12.0756	12.0204	12.0392	11.8359	12.3098	12.4211	12.1462	12.3819	12.1005	12.3323	12.0912	12.0875	12.8138	12.3402	12.2148
Arsa	16.5514	16.6531	16.3532	16.2354	16.4718	16.0433	16.1175	16.2026	16.3887	16.5303	16.6164	16.4046	16.9001	16.4736	16.1938	16.4655
Arsb	19.074	19.1384	18.7599	18.5796	18.8383	17.4579	17.2593	17.9951	18.4324	18.7362	19.05	18.865	19.205	17.3481	18.6312	18.5235
Arsg	13.9328	13.7926	13.4189	13.386	13.5615	13.3657	13.2779	13.2371	13.4862	13.75	13.805	13.5167	13.8037	13.7462	13.6218	14.1908
Arvcf	16.4519	16.648	16.5364	16.5321	16.4917	15.7878	16.123	16.5092	15.9992	16.5695	16.426	16.2605	17.0837	16.8642	16.7918	16.9229
As3mt	18.0722	18.1755	17.9812	18.011	17.9746	17.9401	17.9968	17.9731	18.1047	18.0477	17.9825	17.9276	18.0189	17.4122	17.8521	17.8019
Asah1	19.5184	19.5468	19.3123	19.5283	19.385	18.6262	18.1166	19.0829	19.3224	19.4411	19.4042	19.3993	19.1921	18.318	19.3436	19.0972
Asap1	15.2046	15.3572	15.2734	14.8091	15.2376	15.3444	15.45	15.0203	15.2358	15.1176	15.2616	15.2669	15.2881	15.2827	15.4549	15.5878
Asap2	15.2284	15.3737	15.2876	15.4467	15.2751	15.3781	15.3132	15.3451	15.1209	15.3389	15.3177	15.2549	15.737	15.7301	15.6498	15.8846
Ascc3	14.2383	14.0121	14.1703	14.2132	14.0029	14.2423	14.4786	14.2999	14.1154	14.062	14.1847	14.0899	14.0312	13.9409	13.842	14.1544
Ash2l	17.254	17.2189	17.1597	17.2344	17.2588	17.1151	17.2186	17.1044	17.1875	17.2396	17.1931	17.1974	16.8143	16.4912	17.1031	16.831
Asl	19.0996	19.1632	19.0764	19.0034	19.1699	19.1801	20.1388	18.9502	19.0378	19.0433	19.0498	19.0313	19.0202	18.9812	18.8846	18.869
Asna1	17.8451	17.7917	17.7044	17.845	17.8585	17.9499	17.0677	17.5872	17.6942	17.689	17.8384	17.8632	18.2106	18.2308	18.0492	18.2474
Asns	13.7191	13.628	13.9113	13.7308	13.6247	13.5356	13.691	13.91	13.7548	13.4256	13.9355	13.7511	13.8293	14.544	13.7115	13.8375
Aspa	15.7442	16.203	16.8745	16.503	16.9115	17.515	17.6662	16.7085	15.8238	14.6828	17.2083	16.8705	16.6675	19.4377	16.7396	16.8126
Asph	18.1104	18.2529	18.0494	18.055	17.9332	17.6904	17.8853	18.0452	17.835	18.0539	18.0017	17.9291	18.4058	18.1021	18.3648	18.4745
Aspscr1	16.26	16.2798	16.2808	16.2528	16.3506	16.1085	16.0433	16.0338	16.1809	16.1897	16.2818	16.3282	16.3775	16.1443	15.8954	16.1939
Asrgl1	18.8239	18.9375	18.9361	18.9339	19.1581	19.4078	18.8733	18.9285	18.8046	18.695	19.3916	19.3026	19.4496	20.382	19.3635	19.3418
Ass1	19.5753	19.6643	19.6513	19.6951	19.5034	19.9601	21.7485	19.6332	19.2779	19.6102	19.3946	19.4034	19.3696	19.4228	19.5181	19.5015
Atad1	18.0133	18.0145	17.9766	17.9809	17.8184	17.8999	18.0193	17.861	17.7765	18.1462	17.9405	17.902	18.0612	18.1206	18.1113	18.217
Atad3	16.8633	16.7173	16.7877	16.8402	16.8205	16.628	16.6756	16.9202	16.686	16.7885	16.7991	16.7239	16.9504	17.1648	16.7524	17.0733
Ate1	17.178	17.0539	17.0183	16.9232	17.07	17.0846	16.931	16.9983	16.9552	17.0367	17.0869	16.9641	16.9481	17.0002	17.0675	17.2046
Atf2	13.5464	13.6197	13.6724	13.5975	13.6358	13.496	13.4166	13.6305	13.6825	13.5022	13.7063	13.6924	13.5307	13.3425	13.3964	13.3016
Atf7	12.5043	12.3416	12.1936	12.4835	12.3724	12.773	12.5343	12.4584	12.5932	12.5521	12.587	12.4431	12.3571	12.8309	12.1406	12.1344
Atg12	16.8605	16.9083	16.9941	17.0106	17.1438	17.0694	16.4707	17.0216	16.7045	16.7621	16.6319	16.728	16.5755	16.5251	16.7527	16.706
Atg16l1	14.9497	14.9929	15.0473	15.1982	15.2161	15.3139	15.2212	15.1398	15.3011	15.1209	15.1818	15.2631	14.8306	15.5625	15.0544	15.0321
Atg2a	13.7359	13.6489	13.8781	13.7536	13.7074	13.8319	13.7504	13.8123	13.6968	13.6017	13.8288	13.8464	13.9913	14.2741	14.2437	14.0104
Atg2b	15.1562	14.8962	15.097	15.4296	15.0408	15.5709	14.7766	14.8068	15.1296	14.8115	15.0205	16.1434	16.6086	17.1109	15.7916	15.9011
Atg3	16.3293	16.2226	16.2292	16.1856	16.2259	16.4627	16.2523	16.4043	16.1829	16.2323	16.2284	16.3698	16.398	16.7744	16.4259	16.3685
Atg4b	15.1426	15.1995	15.2502	15.2463	15.1656	15.3379	15.0985	14.931	15.1819	14.9752	15.2359	15.2157	15.2068	15.767	15.3315	15.1865
Atg5	15.0137	15.1413	15.1979	15.1684	15.1822	14.6751	14.8322	14.8475	15.2243	15.0214	15.0634	15.0272	14.6864	14.5963	14.6743	14.7343
Atg7	16.6518	16.7734	16.6766	16.9109	16.7531	16.3204	16.3227	16.476	16.8232	16.5923	16.8119	16.7865	17.0509	17.0715	16.9734	16.8372
Atg9a	13.8944	13.7104	13.544	13.8896	13.8662	14.1498	13.3474	14.0681	14.2292	13.9747	13.8725	14.0182	13.8075	14.6214	13.961	13.9851
Atic	18.1235	18.0603	17.8238	17.9858	17.9198	18.4975	18.3183	18.2187	17.7473	17.8449	17.8545	18.2931	18.9564	19.4528	18.4346	18.7791
Atl2	15.8805	15.8824	15.8361	15.915	15.8099	16.043	16.1516	16.1404	15.8633	15.8927	15.7318	15.8807	15.7701	16.1601	15.7574	15.9388
Atl3	20.0978	20.0369	19.9627	19.9292	19.9533	20.3081	19.9772	20.1247	19.9572	20.0814	19.8882	19.9496	19.9519	19.4428	20.0823	20.1731
Atox1	19.8875	20.0396	20.05	19.8094	20.0455	19.1855	19.3281	19.1477	20.5449	19.8311	19.8761	20.1795	19.2355	18.738	19.1557	18.992
Atp10a	13.5538	13.6247	13.7186	13.5213	13.7622	14.188	13.5496	13.619	13.733	14.6565	13.6754	13.7976	13.6395	12.892	13.6303	13.422
Atp11a	14.4203	14.6967	14.41	14.5368	14.6089	14.9839	14.8339	14.7561	14.6943	14.498	14.6906	14.6974	14.3537	14.8801	14.3782	14.4058
Atp11c	17.781	17.9193	17.9611	17.8839	17.8961	18.1047	18.4126	18.3312	17.9489	17.9099	17.8558	18.0632	17.672	17.0444	17.7865	17.4952
Atp13a1	18.0132	17.827	17.92	17.9717	17.8499	18.0397	18.2306	17.9827	17.9047	18.063	17.9552	18.0919	18.0556	17.6481	18.0588	18.0614
Atp13a5	14.4208	14.503	14.4985	14.3869	14.4522	12.9444	12.4452	13.5828	14.3349	14.5039	14.4158	14.4478	14.151	12.6813	14.3722	14.6643
Atp1a1	21.1587	21.2537	21.2728	21.1313	21.3093	22.1982	22.5507	22.1805	20.9038	20.9894	21.2213	21.3904	21.6194	23.0818	21.4736	21.753
Atp1a2	23.0726	23.1631	23.2288	22.9684	23.2273	23.5116	23.5418	23.1692	22.7268	22.9397	23.1852	23.1231	24.0319	25.2457	23.982	24.2812
Atp1a3	20.5575	21.0431	21.8765	21.1858	21.9243	22.5793	22.5302	21.6299	20.7221	18.8962	21.7823	21.5863	22.0792	24.7806	22.0285	22.4776
Atp1a4	14.5614	15.0058	15.1254	15.0589	14.9292	14.8577	15.1047	14.5246	14.727	14.76	14.7571	15.2619	14.5286	15.6472	14.2499	14.5453
Atp1b1	20.3527	20.834	21.2254	20.7471	21.2092	21.9769	22.1024	21.4492	20.3462	19.8513	21.2341	21.1893	21.5632	23.8374	21.4852	21.792
Atp1b2	18.8722	18.8471	18.8029	18.8478	18.7549	17.8172	17.6598	17.7305	18.6636	18.7493	18.7707	18.7707	19.3779	19.5134	19.3774	19.6038
Atp1b3	19.8821	19.888	19.9659	19.951	19.9885	19.9753	20.0559	19.9183	19.8764	19.8074	19.992	19.8988	20.2614	20.8528	20.1841	20.4249
Atp2a2	22.1666	22.3096	22.2106	22.2327	22.1575	22.1369	22.1394	22.2246	21.8824	22.3359	22.0976	22.0884	22.6862	22.5616	22.5542	22.7944
Atp2a3	20.2165	20.2107	20.0108	20.1052	20.1048	20.2636	20.193	20.2318	19.5049	20.3037	19.8966	19.8951	20.9369	20.5162	20.8704	21.2021
Atp2b1	20.3553	20.4697	20.3232	20.3439	20.3627	20.6009	20.6436	20.6395	20.0248	20.3163	20.2159	20.2454	20.8857	21.4509	20.681	20.8642
Atp2b2	16.3675	16.6668	16.9601	16.566	17.0822	17.3382	17.8336	17.3739	16.1244	15.7977	17.0616	16.9068	17.8099	19.3928	17.389	18.2089
Atp2b4	19.1403	19.3137	19.1563	19.0921	19.157	18.9806	18.6164	18.6558	18.6569	19.297	18.9752	18.8779	19.6462	19.6926	19.5197	19.5301
Atp2c1	15.5944	15.641	15.4715	15.4529	15.4485	15.8106	16.1902	15.974	15.5087	15.8689	15.4204	15.5689	16.0337	16.0391	16.2003	16.316
Atp5f1a	23.8749	23.9615	23.9122	23.8128	23.8861	23.8667	24.164	24.1184	23.7376	23.9016	23.8606	23.9488	24.1684	24.7077	24.1731	24.1783
Atp5f1b	23.3064	23.3216	23.3409	23.2098	23.3003	23.4636	23.6687	23.4603	23.1045	23.2361	23.2308	23.2671	23.6579	24.1437	23.6427	23.7719
Atp5f1c	22.1191	22.0929	22.0164	21.9699	22.0588	22.4704	22.5242	22.43	21.9005	22.1	22.0078	22.0791	22.653	23.2247	22.5733	22.7124
Atp5f1d	19.0901	18.7464	18.6692	18.5835	18.8594	19.4873	19.5199	18.9109	18.4352	18.9512	18.8379	18.7514	19.3089	20.0481	19.437	19.3358
Atp5f1e	15.4592	15.4548	15.6333	15.3881	15.5946	15.3868	16.1393	15.4779	15.3255	15.2271	15.6248	15.5749	15.7997	16.3618	15.1796	15.4353
ATP5IF1	12.2314	12.4904	12.3527	12.3398	12.5234	12.4127	12.9449	12.7284	12.5321	12.3741	12.6761	12.6094	12.6523	13.3551	12.5938	12.8189
Atp5mc1	17.1075	17.4216	17.708	17.7096	17.8057	17.2994	17.7076	17.3263	16.7082	16.7785	16.9515	16.6734	16.5363	17.2696	16.786	16.7399
Atp5md	17.2051	17.4137	17.5809	17.4541	17.4119	17.4057	17.4912	17.5391	17.205	18.3038	17.3261	17.3474	17.5746	17.6258	17.2161	17.3601
Atp5me	19.1178	19.4675	19.854	19.268	19.4	18.9001	19.5752	19.4124	19.4059	19.1062	19.3932	19.3083	20.0892	19.7104	19.0361	19.1372
Atp5mf	17.9536	18.1954	18.1238	18.1561	18.0909	17.8754	18.3147	18.418	18.0674	18.1189	18.1007	18.0439	18.2159	18.5543	18.1503	18.238
Atp5mg	20.2287	20.3768	20.7622	20.491	20.5144	19.694	20.0946	20.0862	20.6153	20.2166	20.4799	20.6015	20.0964	19.6853	19.8796	20.0964
Atp5mpl	18.7577	18.6197	18.7311	18.2096	18.4425	18.7113	18.8471	18.4738	18.4805	18.6312	18.6309	18.6306	19.1659	19.4334	18.7214	18.7334
Atp5pb	20.5262	20.6637	20.6041	20.5416	20.5666	20.8251	21.0409	20.8936	20.4876	20.6354	20.6323	20.5315	20.7902	21.2622	20.7783	20.8857
Atp5pd	20.7492	20.6023	20.5709	20.3332	20.552	21.0546	21.1579	20.8564	20.2453	20.5774	20.3882	20.3758	20.9677	21.5859	20.8453	20.9974
Atp5pf	17.301	17.618	18.1762	17.2873	17.45	17.7698	17.9627	17.5286	17.4386	17.2229	17.3346	17.1404	18.0998	18.5415	17.4069	17.7222
Atp5po	20.7764	20.8534	20.899	20.7204	20.7996	20.9998	20.6074	20.9471	20.7012	20.7829	20.8307	20.7991	20.9771	21.418	21.0956	21.1301
Atp6ap1	14.141	13.9349	13.6138	13.372	13.8646	14.0603	13.7882	13.9336	13.7714	13.6889	14.0821	13.8371	14.1221	14.2981	14.1043	14.4074
Atp6v0a1	18.5019	18.6565	18.6432	18.656	18.7773	18.7844	18.758	18.7287	18.5403	18.4205	18.86	18.6225	19.1494	20.2435	18.8602	19.2424
Atp6v0a2	15.0343	15.4156	15.374	15.4367	15.1144	15.172	13.2514	15.6015	15.6333	15.3094	15.363	15.3253	15.185	14.5324	15.0407	15.2971
Atp6v0c	17.3089	17.2022	16.9258	17.3591	16.9729	16.8251	16.7503	16.9168	17.0274	17.0672	17.1757	17.1282	16.7304	17.6605	17.0231	17.0839
Atp6v0d1	17.8111	17.7158	17.6873	17.6679	17.902	18.0831	18.1454	17.883	17.7746	17.6405	17.7786	17.659	19.1534	19.4477	18.2038	18.4189
Atp6v1a	20.1094	20.1448	20.311	20.214	20.4688	20.5729	20.6133	20.3558	20.1536	19.878	20.3443	20.3612	20.6371	22.0703	20.5418	20.9013
Atp6v1b2	18.6199	18.756	18.876	18.7446	19.0525	19.0518	19.1069	18.8236	18.8498	18.3913	18.9464	19.0819	19.1915	20.5659	19.1523	19.4079
Atp6v1c1	18.5593	18.6581	18.7733	18.7484	18.9138	19.1315	19.2555	19.0278	18.6174	18.3604	18.9095	18.7916	19.3123	20.3895	19.1664	19.494
Atp6v1d	17.5703	17.7882	17.8343	17.95	17.8894	18.0147	18.1881	17.9433	17.5971	17.3974	17.7275	17.7282	18.0654	19.0681	17.8365	18.4402
Atp6v1e1	18.1419	18.282	18.3425	18.1978	18.3758	18.5259	19.1072	18.3989	18.0862	18.0514	18.4063	18.2609	18.4892	19.827	18.4618	18.8257
Atp6v1f	17.2419	17.3671	17.5562	17.4319	17.7071	16.8834	17.1988	16.8668	17.5438	17.1001	17.6892	17.6333	17.418	18.251	17.2847	17.2135
Atp6v1g1	15.8087	15.779	15.4857	15.5583	15.47	15.5536	15.7408	15.8747	15.4465	15.4937	15.4027	15.468	16.0843	16.113	15.7608	15.8357
Atp6v1g2	13.0133	13.0365	13.3677	13.0626	13.5108	13.6233	13.9561	13.1553	13.0318	12.6066	13.3996	13.4201	14.2436	15.9009	13.5486	13.8868
Atp6v1h	18.6897	18.9108	19.0067	18.9744	19.0533	19.2127	19.2966	19.2295	18.8566	18.6205	19.0584	19.0509	19.6302	20.4637	19.2368	19.6735
Atp7a	15.704	15.5742	15.6874	15.5825	15.7005	15.8985	16.0467	15.769	15.7748	15.7474	15.6362	15.8315	15.3138	13.7372	15.5681	15.4827
Atp8a1	19.4241	19.4166	19.4564	19.5428	19.5737	19.4563	19.4521	19.4655	19.5619	19.3426	19.427	19.4326	19.1599	19.3856	19.3075	19.3387
Atp9a	12.2693	12.2031	12.3622	12.2259	12.2953	12.4147	12.4919	12.5618	12.6497	12.0527	12.4857	12.3367	11.9333	12.7952	12.2728	12.0951
Atp9b	15.807	15.8488	16.0525	15.9764	15.9995	16.2753	15.7896	15.8704	16.1543	15.8743	15.9093	16.1419	16.0261	16.7478	15.7088	15.8565
Atpaf1	15.8402	15.835	15.9461	15.9429	15.8912	15.9512	15.4095	15.8825	15.9106	15.6974	15.8577	15.9699	16.3283	16.5505	16.0222	16.1967
Atrx	17.5381	17.4155	17.3979	17.3789	17.3809	17.2435	17.1594	17.5042	17.5118	17.5496	17.5116	17.4768	17.2015	17.2941	17.364	17.0916
Atxn10	17.5613	17.7371	17.7343	17.6657	17.715	17.9929	18.0226	17.8876	17.7409	17.5093	17.7375	17.7415	18.1765	18.5853	18.0465	18.3796
Atxn2	16.4512	16.3916	16.4267	16.2184	16.3508	16.448	16.8119	16.2097	16.3082	16.3223	16.4716	16.3858	16.3091	16.057	16.124	16.2827
Atxn2l	16.0609	15.919	15.9407	16.0001	16.006	16.1726	16.0774	15.8716	15.9966	16.0678	15.9425	16.0922	15.9835	15.9881	15.9513	15.7618
Auh	17.8204	18.0612	18.1318	17.9503	17.9537	18.5207	18.8151	18.6826	17.8497	17.882	18.0486	18.1019	18.1977	19.3757	18.3249	18.6042
Aup1	13.9539	13.4879	13.5615	12.7988	13.3981	14.2864	13.2462	13.0497	13.3794	13.6659	13.5829	13.4448	13.5397	14.2461	13.3803	13.8006
Avl9	14.1414	14.4544	14.4429	14.7609	14.5539	14.1246	14.4939	14.3103	14.4917	14.3742	14.4393	14.5361	14.764	15.3232	14.6783	14.534
B2m	18.7336	18.3931	18.6823	18.4737	18.3542	18.8049	18.7401	18.2657	18.4418	18.6075	18.4781	18.6552	18.1444	17.3329	18.1622	18.3858
B3glct	14.2672	14.2386	14.299	14.0888	14.4416	14.5417	13.2939	14.4636	14.1581	14.371	14.1962	13.7951	14.5879	15.3058	14.4779	14.3734
B4galt1	12.6035	12.5975	12.5659	12.6034	12.6731	12.4597	12.9472	12.7344	12.8215	12.5374	12.8888	12.8983	12.8055	12.8032	12.5744	12.9664
B9d2	13.2741	13.4026	13.1047	13.2291	13.0904	14.8297	14.5355	14.86	13.3284	13.3764	13.3285	13.6463	13.273	14.7362	13.8454	14.9924
Babam1	14.4384	14.3158	14.3884	14.1429	14.3525	14.3424	14.6002	14.4356	14.548	14.493	14.4978	14.5005	14.3913	14.2869	14.2751	14.3709
Babam2	14.4717	14.4049	14.3103	14.1795	14.3852	14.1771	14.0409	14.2481	14.5343	14.475	14.479	14.4196	14.4747	14.4305	14.4894	14.2644
Bad	12.519	12.2201	12.0586	12.1173	12.1007	12.8356	12.5951	12.245	12.3525	12.3007	12.175	12.3791	12.7961	13.2403	12.4038	12.6531
Bag1	17.1326	17.1065	17.2089	17.2994	17.1634	17.2954	17.378	17.3334	17.333	17.1684	17.3219	17.2085	16.9188	17.0717	17.2797	17.1014
Bag3	16.4271	16.3106	16.3475	16.3703	16.3098	16.4895	16.8641	16.5425	16.5665	16.4171	16.3438	16.2309	16.3925	15.7371	16.3163	16.4555
Bag5	17.975	18.1573	18.1276	18.1169	18.1981	17.8327	17.9336	17.8091	18.2721	18.0718	18.1837	18.2361	17.5352	17.4498	17.7383	17.5947
Bag6	15.9838	16.0033	15.9597	15.7762	15.8704	16.134	16.0517	15.8153	15.89	15.8656	15.9689	15.8797	15.878	16.1698	15.9788	16.2273
Baiap2	16.7746	16.7785	16.8913	16.9227	17.016	16.8223	16.9639	16.8848	16.9275	16.667	16.9273	17.0469	17.1302	17.779	16.866	16.7743
Baiap2l1	13.9503	14.1294	14.1314	14.1404	14.2949	14.3047	14.411	14.3454	14.2373	14.2083	14.2698	14.1464	13.4093	13.3328	13.7407	13.5475
Banf1	16.7349	17.1636	17.2974	16.9827	17.2353	16.2545	16.3447	16.3203	17.3059	17.1969	17.1508	17.2229	17.0149	16.2658	16.6588	16.436
Bap18	15.2878	15.1867	15.235	15.1926	15.2306	14.8144	14.4874	15.0097	15.3198	15.2737	15.4548	15.2407	14.8164	14.6724	14.7966	14.3268
Basp1	17.0078	17.896	18.2657	17.8629	18.2157	19.2131	18.8934	17.8995	17.3148	16.1015	18.5732	18.1742	18.8486	21.6308	19.2452	18.698
Bax	15.931	15.7614	15.7576	15.871	15.8541	15.765	14.8787	15.4524	15.9464	15.9558	15.8769	15.9372	15.2788	15.7373	15.6427	15.6365
Baz1b	18.4988	18.4685	18.461	18.5914	18.537	18.0573	18.0011	18.281	18.583	18.6586	18.5256	18.433	18.0555	17.3327	18.2	17.9444
Bcam	20.968	20.9251	20.8191	20.6117	20.7526	20.773	20.6118	20.4275	20.4913	21.0059	20.5797	20.6006	21.5697	21.1338	21.4142	21.6168
Bcap29	16.6026	16.6003	16.5798	16.5743	16.6657	17.0365	16.7263	16.9824	16.077	16.3642	16.0962	16.1357	15.5992	16.1474	16.378	16.2042
Bcap31	20.0923	20.0708	20.1655	20.1822	20.2259	20.2175	20.2601	20.2672	20.2012	20.2094	20.1413	20.073	19.941	19.4232	20.1183	20.0878
Bcar1	14.8428	14.8174	14.6019	14.6877	14.5422	14.5722	14.4741	14.4428	14.5629	14.718	14.6726	14.5315	15.0094	14.6866	14.3473	14.3269
Bcar3	13.1679	13.346	13.3248	13.3925	13.4349	13.5705	13.1865	13.5889	13.3238	13.1355	13.5021	13.3249	13.3416	13.4592	13.256	13.3282
Bcas1	17.5229	18.1469	19.0533	18.341	18.8765	19.6254	19.5746	18.5363	17.9398	16.4557	19.109	19.091	18.7469	21.5796	18.8326	18.6839
Bcas2	15.3314	15.0579	15.2801	15.0211	15.0676	15.5749	15.2942	14.6878	15.1786	15.3374	15.0629	15.1304	15.1765	14.4338	14.9022	14.9889
Bcas3	15.4606	15.3022	15.5122	15.4312	15.5165	15.5607	15.6257	15.2728	15.4711	15.4117	15.5469	15.5634	15.4276	15.3754	15.5525	15.3619
Bcat2	17.664	17.4668	17.4597	17.5833	17.4515	17.5368	17.2533	17.4858	17.554	17.7364	17.3755	17.5041	17.6273	17.6205	17.7594	17.6669
Bche	13.2608	13.2543	13.2363	13.3547	13.4948	13.6725	13.8534	13.3574	13.4172	13.1742	13.5879	13.3031	13.2979	12.7141	13.5884	13.0662
Bckdha	18.1105	18.227	18.0598	18.1099	17.852	17.9991	17.2573	18.2611	17.8083	18.2851	18.0084	18.1378	18.3289	17.8218	18.2633	18.188
Bckdhb	13.2031	13.1603	13.1221	13.3414	12.9888	12.619	13.4686	12.8038	13.105	13.7662	12.9377	12.8817	13.1584	12.6887	12.8121	13.0461
Bckdk	12.6211	12.7557	12.7908	12.7512	12.7534	12.9951	12.4348	12.8361	12.6996	12.8046	12.7743	12.7974	13.1573	13.639	12.7381	13.2098
Bcl2l1	14.3869	14.5356	14.3907	14.172	14.268	14.7053	13.9055	14.6578	14.3126	14.3643	14.1655	14.4324	13.7615	13.9936	14.4181	14.5611
Bcl2l13	15.2322	15.1785	15.1677	15.2229	15.0846	15.3691	15.0758	15.1693	15.0607	15.2516	15.2104	15.207	15.4473	15.4386	15.4366	15.1979
Bcl7b	14.4279	14.3213	14.2342	14.3659	14.2858	14.2794	14.5898	14.4506	14.4419	14.3418	14.4853	14.199	13.8655	14.2176	13.954	13.8706
Bclaf1	17.7785	17.7238	17.667	17.7208	17.6919	17.8561	17.8907	17.7295	17.5922	17.8521	17.7755	17.9812	18.0507	18.0792	17.6059	17.6189
Bcr	12.9155	12.5211	12.5648	12.6245	12.6857	13.0712	13.1191	12.9019	12.7025	12.7815	12.8016	12.8435	13.1721	13.5041	13.0619	13.0865
Bcs1l	15.6471	15.5712	15.5571	15.6135	15.3784	15.5601	15.2083	15.2534	15.5089	15.3458	15.6805	15.63	15.5665	16.042	15.7753	15.8184
Bdh1	13.997	14.039	13.9501	13.9441	13.8716	14.3525	15.5859	14.5238	13.6545	14.2067	14.002	14.0679	14.4638	15.4607	14.0924	14.4167
Becn1	14.9068	15.2306	15.1162	15.3448	15.1441	15.0104	14.495	15.1938	15.2078	15.196	15.2049	15.4608	15.1987	13.3642	15.1442	14.9168
Bet1	14.7986	15.0862	15.0085	14.8818	14.8698	14.6112	14.616	14.5862	15.1107	14.8878	15.2908	15.1682	15.1395	14.937	14.7275	14.835
Bgn	18.0745	17.8462	17.7551	17.8197	17.7926	17.7562	17.9591	17.8171	17.4584	17.6307	17.7172	17.8597	19.0939	18.5958	18.5771	19.268
Bhmt	15.8764	15.5728	16.23	16.1941	15.1415	13.497	20.7987	13.6485	14.1509	14.02	14.1841	14.8609	14.4108	14.5977	14.1374	14.428
Bicd2	15.7182	15.7817	15.811	15.7039	15.8831	15.9556	15.2006	16.0144	15.8224	15.931	15.8982	15.7959	15.8851	15.7829	16.0254	16.0823
Bin1	17.681	18.2478	18.5329	18.2476	18.5291	19.1468	19.0514	18.3138	17.6507	17.4048	18.6003	18.3645	18.5062	20.9277	18.6725	18.9262
Bin2	15.5807	16.0079	16.016	15.6363	16.0365	15.1806	14.7005	16.3119	16.4301	16.9158	16.3806	16.5188	18.1547	16.9758	18.5312	19.4898
Bin3	12.6642	12.7425	12.7051	12.8033	12.6744	12.6664	12.9195	12.9675	13.0497	12.8764	12.8157	12.7978	13.0312	12.883	12.7383	12.2402
Birc6	17.0223	16.8632	16.8502	16.9128	16.7806	16.7571	17.0613	16.9752	16.7392	16.8426	16.8917	16.8547	16.855	16.8385	16.857	16.824
Bles03	13.5263	13.4658	13.7382	13.6932	13.5277	13.2461	13.7206	13.4577	13.7323	13.6382	13.8782	13.6828	14.1316	13.9797	13.8061	14.4052
Blm	14.7658	14.6924	14.79	14.6687	14.4709	14.8027	14.8079	14.3693	14.7543	14.5315	14.5895	14.6351	14.8215	14.4666	14.2919	14.0642
Blmh	18.9951	19.047	19.112	19.1894	19.1671	19.1756	19.2	19.0294	19.0042	19.0031	19.0857	19.1656	19.3596	19.8412	19.0514	19.2013
Bloc1s1	14.6949	14.7909	15.0444	14.6636	14.9736	14.3511	14.7005	14.7379	14.9177	14.7438	14.9372	14.7163	14.7504	14.6157	14.0252	14.1745
Bloc1s2	12.7891	12.6763	12.9307	12.5563	12.6376	12.9657	12.592	12.5864	12.9933	12.841	12.8402	12.6704	12.645	13.2415	12.5926	12.6937
Bloc1s5	15.4548	15.5649	15.5346	15.5026	15.574	15.5019	15.2209	15.4989	15.6439	15.484	15.5763	15.3543	15.3111	15.4544	15.0757	15.2135
Blvra	16.6021	16.6275	16.7219	16.8308	16.6435	16.7217	16.7714	16.6299	16.7436	16.6057	16.747	16.9629	17.2113	16.9426	16.7668	16.8668
Blvrb	19.1811	19.0977	19.0454	19.1447	19.1806	19.1917	19.3223	18.9874	19.093	19.0541	19.0867	19.1372	18.815	18.4535	18.9766	18.8274
Bmp2k	15.8116	15.6683	15.5558	15.6136	15.7541	16.0635	15.8992	15.633	15.8257	15.7441	15.7533	15.9521	16.192	16.4897	15.4818	15.5739
Bmpr2	16.9083	16.943	16.9341	16.939	16.9374	16.8022	16.1302	16.9254	16.86	16.9389	16.8032	17.124	17.2589	17.8691	16.9037	16.612
Bmx	19.1288	19.2448	19.0499	19.4124	19.1403	19.5879	19.6674	19.6587	18.6549	19.3019	18.9531	18.9033	19.1984	19.1772	19.1579	19.2551
Bnip1	14.7206	14.5049	14.3387	14.1977	14.4116	14.6144	15.3157	14.4353	14.5569	14.5388	14.3201	14.6856	14.5178	14.671	14.59	14.6778
Bnip2	14.0167	14.0952	14.4032	14.3341	14.3156	14.3729	13.5743	14.302	14.3245	14.3184	14.284	14.0451	13.6438	13.0605	13.698	13.4257
Bnip3l	13.7439	13.6291	13.5879	13.7193	13.1954	13.8317	14.2522	14.2128	13.8962	13.5662	13.4649	13.4803	13.6306	13.446	13.3948	13.5807
Bod1l	12.1194	12.4917	12.4899	12.5913	12.3653	12.3177	12.6602	12.3049	12.6093	12.4931	12.7196	12.5291	12.1124	12.8489	12.1698	12.223
Bola1	14.3509	14.424	14.3223	14.4284	14.3147	14.5069	14.2817	14.2272	14.22	14.394	14.5281	14.4237	14.2585	14.4967	14.0048	14.3788
Bop1	12.3657	12.1572	12.0536	11.9987	12.081	12.2926	12.4115	12.1919	12.2587	12.1767	12.2941	12.2263	12.6022	12.8139	11.9451	12.4526
Bpgm	17.4437	17.4486	17.3036	17.6257	17.5912	18.0454	18.0629	17.9704	17.5284	17.4168	17.3095	17.3812	16.8238	17.0965	17.0757	17.0311
Bphl	19.2403	19.4006	19.2801	19.2255	19.2419	19.5576	20.3189	19.7024	19.0804	19.4034	19.3264	19.3999	19.598	19.7957	19.5201	19.4429
Bpnt1	18.3469	18.5306	18.531	18.4229	18.569	18.8664	18.6411	18.6515	18.3053	18.2969	18.4669	18.4026	18.6017	19.4066	18.4671	18.5544
Brat1	12.7985	12.644	12.689	12.4652	12.8057	13.0951	13.0477	12.6015	12.8589	12.7166	12.921	12.8966	12.8527	13.6012	12.7115	12.7034
Brcc3	12.6827	12.6224	12.5571	12.8179	12.6231	12.7433	12.8757	12.1388	12.9599	12.5206	12.7287	12.7259	12.5558	12.7902	12.5392	12.7026
Brd2	12.4521	12.4739	12.588	12.4166	12.1587	13.2587	12.6164	12.8241	12.6718	12.4813	12.4181	12.6762	12.2913	12.7653	12.2351	12.2999
Brd3	17.1188	17.3034	17.2867	17.3155	17.3449	17.1434	17.3419	17.0854	16.8676	17.0142	16.9637	17.0613	16.9378	17.1064	17.145	17.1634
Brd4	16.4699	16.3704	16.1999	16.3206	16.2914	16.2491	15.9917	16.1717	16.2338	16.3776	16.3471	16.2397	16.2412	16.2499	16.1875	15.8418
Brix1	16.5896	16.4816	16.4112	16.6171	16.2545	16.2919	16.5023	16.5216	16.498	16.5153	16.4053	16.4027	16.3524	15.9716	16.4524	16.2083
Brms1l	14.1226	14.0732	13.9958	14.2308	14.0777	13.7013	13.3731	14.1977	14.2313	14.2361	14.1518	14.0371	14.0624	14.1221	13.8688	13.437
Brox	17.3952	17.2607	17.2231	17.1707	17.2978	17.6005	17.2924	17.3027	17.1293	17.3128	17.2395	17.312	17.453	17.2618	17.537	17.4625
Bsg	20.8829	20.5119	20.4455	20.3139	20.7719	21.0305	20.9606	20.9126	20.8192	20.6562	20.5141	20.6196	20.2379	19.1218	20.6349	20.2847
Bst2	14.1827	14.264	14.5888	13.9371	14.5845	13.4323	14.1815	13.9044	14.4586	13.9474	14.2339	14.1872	13.3349	13.342	14.5153	13.4358
Btbd17	15.9444	15.8531	15.8017	15.7277	15.8189	15.8261	15.8109	15.4747	15.6867	16.2374	16.01	16.21	18.0147	17.2357	17.6576	17.9854
Btd	15.1868	15.0476	15.1325	14.997	15.1797	14.4337	14.8518	15.1716	15.0504	15.0282	15.0567	15.3236	15.5598	15.611	15.2197	15.1952
Btf3	18.1164	18.078	17.9635	18.029	18.0202	18.1132	17.7817	17.9797	17.9836	17.9919	18.0076	17.9635	17.8659	17.6175	17.9085	17.7063
Btf3l4	15.8283	15.8168	15.6675	15.6157	15.7881	16.2522	16.4644	16.448	15.553	15.6248	15.7449	15.688	16.2432	16.2086	16.0453	16.1834
Btk	15.259	15.1366	15.1774	15.3026	15.1105	14.8778	15.2661	15.3859	15.2332	15.0178	15.1194	14.9682	15.2264	15.3349	14.8559	15.1448
Bub3	17.9133	17.6426	17.7321	17.7048	17.7464	18.0635	17.7377	17.6607	17.6769	17.7871	17.8375	17.6814	17.498	17.2695	17.7558	17.5987
Bud23	12.2168	12.375	12.3151	12.1967	12.1953	12.494	12.458	12.592	12.5413	12.1746	12.4756	12.4264	12.577	13.176	12.5256	12.8093
Bud31	16.8015	16.9509	16.9292	17.1302	16.9846	16.8546	16.9596	16.8994	16.9888	17.0289	16.9907	16.8222	16.6327	16.4838	16.8253	16.3296
Bzw1	19.2701	19.3506	19.3548	19.4696	19.4255	19.2676	19.4521	19.4215	19.5337	19.2279	19.4449	19.3649	19.2675	19.1285	19.2511	19.2358
Bzw2	14.1439	13.8317	13.8946	13.8336	14.0431	14.0595	14.409	14.0981	13.9849	14.0063	13.9518	14.067	14.2562	13.8159	13.9891	14.2373
C1qbp	16.4853	16.4343	16.4993	16.6883	16.6096	16.4324	16.6133	16.2993	16.4876	16.5326	16.6434	16.5815	16.3208	16.8956	16.6116	16.3529
C2cd2	14.2703	14.1276	14.2192	14.2027	14.1879	14.1706	13.9838	14.347	14.0621	14.1854	14.0503	14.146	14.1849	13.8752	14.188	14.0117
C2cd2l	13.5457	13.5073	13.0732	13.1448	12.8304	14.1421	13.578	13.9606	13.4592	13.2878	13.1685	13.1807	13.1746	13.563	13.0483	13.7788
C2cd5	12.9082	12.9386	12.7608	12.9546	12.8908	12.6863	12.8661	13.2212	13.1206	12.9035	12.9926	12.9875	13.3377	14.1248	13.1375	13.5142
C3	17.4837	17.4583	17.5843	17.7786	17.5229	17.6065	18.2669	17.7278	17.6173	17.3983	17.5153	17.497	17.158	16.824	17.6886	17.5196
C4b	18.8494	19.981	19.6055	18.2653	16.9287	18.2156	17.9983	16.9842	16.8663	18.4355	18.5531	19.351	18.2957	16.9673	17.4021	17.1748
C6.1al	14.6755	14.8776	14.7663	14.7372	14.93	15.2563	14.7459	14.5321	14.7962	14.7572	14.6584	14.7163	14.1035	12.7196	14.7014	14.178
Ca1	17.6855	17.4719	17.1877	17.672	17.5872	17.3002	17.9174	17.5252	17.2876	17.2029	17.0335	17.361	17.1483	16.8449	17.4849	16.9137
Ca12	12.5947	13.255	12.7011	12.3132	12.4692	13.705	14.6147	14.3256	12.8581	13.0136	12.7346	13.2771	12.9177	13.0213	12.3502	12.5115
Ca14	15.2007	15.221	15.2442	15.1782	15.2641	16.0479	16.0288	15.534	14.8858	15.1276	15.2895	15.5706	15.9466	17.2171	15.7216	15.6144
Ca2	20.8928	21.2517	21.3769	21.2736	21.476	21.8295	22.1378	21.6244	21.2014	20.5463	21.6755	21.5509	20.7581	23.2428	21.0343	20.5522
Ca3	15.0885	15.2333	15.2921	15.4617	15.2592	14.8807	20.7597	14.997	14.7022	14.4978	14.9023	14.7859	15.2693	16.459	14.8558	15.3323
Ca4	21.6117	21.5428	21.6643	21.5143	21.8981	21.3411	21.2394	21.2565	21.777	21.6325	21.5592	21.7887	21.0926	19.0393	21.3391	21.1042
Ca5b	14.1567	13.86	14.0764	13.5259	13.7995	14.1409	13.4916	14.3895	13.8508	14.434	13.8416	13.9424	14.0134	13.2013	13.8136	13.6131
Ca7	12.2475	12.3519	12.0112	12.2091	12.1344	12.6158	13.4152	12.5013	12.4886	12.1075	12.4792	12.5748	12.3368	13.2365	12.1652	12.6145
Ca8	15.851	15.3825	16.3238	16.8223	16.6613	16.847	16.3438	16.2219	16.3649	15.5938	16.8869	17.3729	18.9212	19.3184	17.3893	18.6079
Caap1	12.8058	12.6609	12.5323	12.7098	12.5123	12.5098	12.5644	12.9489	12.8681	12.692	12.916	12.6827	12.2486	12.7288	12.1148	12.5013
Cab39	18.991	19.1812	19.0647	19.1788	19.1146	19.3052	19.2703	19.3307	19.1462	18.9903	19.0662	19.0227	19.2663	19.5219	19.2187	19.4027
Cab39l	13.8931	14.4318	14.0988	13.8683	13.8443	15.0428	15.1277	15.6527	13.9703	14.0427	13.9807	14.4798	13.4947	13.9751	13.7332	13.261
Cacna2d1	18.7605	18.9259	18.7835	18.7755	18.7802	18.3821	18.0444	18.2931	18.3448	18.6532	18.6432	18.4718	19.3242	19.8152	19.3119	19.4627
Cactin	14.7349	14.6555	14.6669	15.0054	14.8002	14.0844	13.9353	14.6114	14.8723	14.7899	14.7649	14.943	14.3863	13.7437	14.2369	14.1134
Cacul1	12.453	12.4845	12.3315	12.4053	12.2525	12.4364	12.8305	12.6858	12.5991	12.4787	12.4724	12.3045	12.7561	12.7952	12.7053	12.7194
Cacybp	18.9177	19.1323	18.999	19.2097	19.0527	19.7816	19.5525	19.2232	19.0037	18.9133	19.0279	19.0367	19.5675	20.0286	19.2861	19.4393
Cad	18.1012	17.8791	17.9808	18.0503	17.9591	18.0972	17.8566	17.9165	17.8696	17.9883	18.0338	18.1433	18.1722	18.3998	18.3114	18.2284
Cadm1	16.1132	16.0896	16.3616	15.9583	16.2975	15.7406	15.8577	15.9236	16.5129	16.2107	16.4167	16.2903	16.0567	16.6309	16.3275	15.8087
Cadm2	13.2504	13.2481	13.5934	13.2467	13.5733	14.0389	14.2246	13.5867	13.2214	12.6083	13.6628	13.6891	14.4827	16.9117	14.3635	14.4006
Cadm3	14.8803	15.2987	15.7894	15.5791	16.2542	16.4946	16.5667	15.7305	14.8646	13.8589	16.046	15.4336	16.4971	18.6763	16.3761	17.2895
Cadm4	14.1807	14.7302	15.083	14.4984	15.0209	15.7916	15.5597	14.7018	14.3564	14.0005	14.7704	14.9717	15.3576	17.404	15.4781	15.7639
Cadps	13.4935	13.8176	13.8858	13.9683	14.3108	14.8323	14.8381	14.3275	13.3638	13.2246	14.0334	13.6139	15.0496	16.264	14.7272	15.4292
Calb1	18.0139	17.8247	18.7542	19.0047	19.1896	19.1845	19.317	18.89	18.2679	17.4274	19.1879	19.1609	19.6188	20.1232	18.717	19.8984
Calb2	17.4151	17.7082	18.2807	18.3801	18.5077	19.2523	19.6808	18.3478	17.7539	17.1165	18.4019	18.2421	18.8675	19.4624	18.5455	19.5197
Calcoco1	12.8529	12.7979	12.857	12.8862	12.8402	13.1803	12.6499	12.8916	12.8161	13.0002	12.8972	12.9232	13.0602	13.1073	12.9682	12.8936
Calcrl	16.0191	16.0242	15.6697	15.8722	15.7903	16.4953	14.8045	16.1816	16.1043	16.1719	15.9713	16.0218	16.062	16.0873	15.936	15.8414
Calm2	21.8774	21.7326	21.6508	21.5139	21.8158	22.3026	22.0016	22.0036	21.4274	21.6874	21.5243	21.3793	22.0614	22.8571	22.0022	22.1795
Calr	22.9792	22.9422	22.8931	22.9569	22.9174	23.0284	23.2705	23.1503	22.9457	22.9937	22.9376	22.9147	22.9271	22.4793	23.0513	23.0956
Calu	20.6259	20.568	20.6356	20.8045	20.8549	20.6194	20.7444	20.619	20.5637	20.6315	20.6414	20.3725	20.4837	19.6581	20.6107	20.5711
Camk1	17.6468	17.5559	17.5896	17.5253	17.4063	17.3574	17.1955	17.2252	17.4299	17.5344	17.597	17.49	17.9235	17.9012	17.8039	17.693
Camk2a	17.1892	17.6369	18.0049	17.8639	17.9741	18.5998	18.3106	18.0542	18.8486	16.1845	17.9715	17.8029	19.524	21.9534	18.9841	19.2895
Camk2b	15.949	16.307	16.7876	16.5966	17.0159	17.6377	17.3601	16.7441	16.1785	15.2701	17.1737	16.7665	17.6556	20.0169	17.2977	17.9614
Camk2d	18.7904	18.8375	18.8059	18.7468	18.8109	18.8412	18.8548	18.7941	18.6587	18.7427	18.7594	18.6916	19.0107	19.9348	19.0239	19.0789
Camk2g	18.9589	19.1257	19.1881	19.2406	19.2637	19.1921	18.6004	19.064	18.8703	19.0301	19.1986	19.0312	19.3174	20.2461	19.4217	19.6254
Camkk2	11.8516	11.783	11.7128	11.7585	11.8559	12.7914	12.8956	12.8956	12.0647	11.8152	12.5391	12.2389	13.164	13.5095	12.4226	12.1245
Camkv	14.3612	14.3266	14.5893	14.7159	14.7039	15.115	15.6019	14.888	15.5355	13.6142	14.7552	15.0015	16.8498	18.3458	16.3769	17.024
Camlg	13.0732	13.4501	13.7471	13.221	13.1602	13.0422	13.2758	13.0631	13.3361	13.2241	13.2814	13.0414	12.7403	13.1358	13.4031	12.4514
Camp	12.7737	12.8103	12.2026	12.5483	12.4535	12.8809	12.5233	12.8385	12.2995	12.4233	12.6859	12.2463	11.9741	12.8091	12.4914	12.5958
Camsap1	17.3203	17.418	17.5137	17.3101	17.4944	17.2539	17.0164	17.2336	16.6321	17.0071	16.6774	16.7994	17.3371	16.8799	17.5733	18.2369
Camsap2	12.5448	12.6705	12.6197	12.5518	12.6023	12.9828	12.9446	12.6071	12.7396	12.5743	12.6493	12.669	12.521	12.7434	12.4059	12.5112
Cand1	20.9121	20.9624	21.0157	20.9537	21.0969	21.0109	20.9326	20.8536	21.0788	20.8743	21.0363	21.0732	21.27	21.7147	21.1215	21.2372
Canx	21.7478	21.7032	21.7474	21.7632	21.8432	21.8643	21.9182	21.8174	21.7049	21.8181	21.8205	21.7037	21.877	21.6626	22.0096	21.9812
Cap1	22.0408	22.0693	21.9538	21.9462	21.9447	22.092	21.8709	22.0145	22.0095	22.1077	21.9366	21.9625	22.5053	22.3951	22.5671	23.0962
Cap2	16.5614	16.9026	16.6029	16.8022	16.6611	17.0765	16.4922	16.5432	16.4416	16.8338	16.6133	16.8494	17.4689	18.4411	17.189	17.2024
Capg	20.4442	20.0518	19.8807	19.8479	20.0727	20.1496	20.0131	20.1926	20.5157	20.1369	19.9339	20.086	19.9466	19.1648	19.7269	19.6622
Capn1	19.9008	19.9656	19.9177	20.0214	19.9663	19.8962	19.9323	19.8969	19.8649	19.8694	19.7904	19.75	19.8468	19.5502	19.8264	19.9711
Capn2	20.2023	20.2921	20.2877	20.3509	20.374	20.2548	20.1898	20.2908	20.1992	20.2339	20.1764	20.2087	20.0354	19.8802	20.1469	20.2544
Capn5	15.1561	15.3531	15.408	15.3446	15.305	15.8301	16.0082	15.4899	15.1257	15.2862	15.4004	15.4954	15.6728	17.1908	15.8628	15.9761
Capns1	19.912	20.1477	20.1018	20.2306	20.1164	19.9558	20.0405	20.0585	20.1647	19.9544	20.0227	19.8981	19.8547	19.6081	19.7987	19.8929
Caprin1	19.0117	19.0112	18.946	18.9356	19.0201	19.0514	19.048	19.1992	19.0309	18.9431	19.1427	18.8528	18.5122	18.3154	18.7212	18.6939
Capza1	19.6833	19.5912	19.496	19.5517	19.555	19.6689	19.3697	19.7127	19.6619	19.5967	19.5173	19.5064	19.6425	19.2634	19.725	19.7139
Capza2	20.1595	20.1015	19.8973	20.025	20.0401	20.1495	19.8937	20.1334	19.9724	20.0489	19.9983	19.9214	20.2293	20.1958	20.2433	20.3002
Capzb	20.5365	20.5056	20.3589	20.3997	20.576	20.5933	20.4932	20.527	20.5889	20.5531	20.4741	20.383	20.4467	20.4097	20.559	20.5899
Card19	13.9564	14.05	14.1701	14.1849	13.9553	14.1943	13.9655	13.7027	14.031	14.2513	14.1264	14.2915	14.1404	14.1767	13.8141	13.8606
Carhsp1	17.0201	17.0595	17.0747	17.0327	17.0649	17.3728	17.2548	16.894	17.0741	16.8538	17.1443	17.0486	17.0048	18.0241	17.1325	17.1255
Carm1	15.7433	15.8439	15.6301	15.816	15.6569	15.8233	15.927	16.0888	15.7091	15.4583	15.4353	15.5951	15.9497	16.2893	15.8936	15.8381
Carmil1	14.2002	14.4833	14.5858	14.504	14.5339	14.1179	14.1951	14.1692	14.1919	14.3071	14.4737	14.417	14.3357	14.1861	14.5928	14.6037
Cars1	17.9062	17.9968	17.9802	17.9384	17.9934	18.2061	18.2784	18.2188	17.8608	17.8162	17.9344	17.8866	17.9327	18.0585	17.8797	17.9863
Cars2	15.1925	15.2612	15.3407	15.4413	15.3992	15.5069	15.2359	15.3445	15.3389	15.5283	15.3173	15.2289	15.5892	15.3546	15.6627	15.1782
Casc4	14.5007	14.5894	14.4002	14.5581	14.253	14.1086	15.0479	15.1412	14.3628	14.39	14.4951	14.0581	15.6215	15.5842	15.0922	15.1285
Cask	17.9721	18.185	18.1005	18.1835	18.079	17.9558	17.7918	17.9808	17.996	18.1111	18.1147	18.1016	18.2497	18.3819	18.1674	18.0582
Caskin1	13.0798	13.3352	13.3007	13.3085	13.3646	13.7605	13.5949	13.5224	13.1264	13.3673	13.6131	13.4626	13.9421	14.7974	13.8636	13.9412
Caskin2	18.1627	18.0847	18.2708	18.2896	18.2594	18.0173	18.0103	18.2812	18.0185	18.0624	18.0617	17.965	17.6895	16.7002	17.9256	17.6542
Casp3	11.8782	11.742	11.7238	12.6088	11.8068	12.4436	12.9337	12.5143	12.0823	12.37	11.9878	11.8494	12.1104	13.1205	12.3052	12.0767
Casp6	17.7844	17.6106	17.6364	17.8295	17.7969	17.4962	17.4311	17.76	17.9906	17.6541	17.5882	17.7332	17.2049	16.4418	17.3488	17.4072
Casp7	15.3009	15.1571	15.3029	15.1378	15.1705	14.9309	14.9473	15.1004	15.5245	15.1362	15.2324	15.3061	14.798	14.3652	14.4794	14.427
Casp8	16.0958	15.9845	15.9912	15.9536	15.9367	15.9515	15.5416	15.9932	16.2353	15.9962	16.0659	15.9792	15.4948	15.2478	15.861	15.3482
Casq2	18.2527	18.6467	18.477	18.3005	18.4419	16.4272	16.6616	16.377	17.9246	18.1045	18.3565	18.1843	18.277	17.0079	18.3441	18.1876
Cast	19.7013	19.6988	19.6371	19.6747	19.7717	19.6439	19.5159	19.543	19.7741	19.5653	19.5997	19.5157	19.1703	18.6904	19.3776	19.2726
Cat	20.0413	19.9675	19.9512	19.9639	19.7495	19.7883	21.889	19.924	19.6457	19.8964	19.5543	19.69	19.7853	19.3345	19.7293	19.8397
Cav1	22.2706	22.1615	22.1999	22.1563	22.2393	22.2994	21.9741	22.2195	22.2741	22.2517	21.9938	21.9878	21.9693	21.4612	22.0504	22.0141
Cav2	17.732	17.4914	17.405	17.3092	17.4228	17.9171	16.5954	17.7698	17.2684	17.5914	17.205	17.4052	17.5881	17.1944	17.6543	17.5964
Cavin1	22.2506	22.2518	22.1574	22.1667	22.2281	22.3054	22.0327	22.3289	22.1157	22.3069	22.0041	21.9377	22.1096	21.5105	22.1334	22.1187
Cavin2	21.4403	21.4048	21.3702	21.3973	21.4759	21.5967	21.5257	21.481	21.3872	21.54	21.2761	21.3155	21.2042	20.273	21.3154	21.4092
Cavin3	19.8937	19.8785	19.7229	19.5121	19.5931	19.5504	19.1081	19.6591	19.5584	19.837	19.3617	19.2678	20.0779	19.8008	19.9505	20.0371
Cbfb	14.3025	14.2138	14.3048	14.3498	14.2549	14.3923	14.4916	14.3529	14.4776	14.1884	14.3865	14.3061	14.1964	14.3655	14.1743	14.2648
Cbl	15.6313	15.6925	15.7926	15.8343	15.8998	15.594	15.6742	15.757	15.9506	15.9048	15.866	15.8369	15.668	15.5097	15.7802	15.8859
Cblb	13.1641	13.2314	13.1332	13.1371	13.2883	12.7313	12.6198	13.2882	13.4133	13.1643	13.1845	13.1412	13.4037	13.6522	12.8887	13.0343
Cbln1	16.7886	16.6072	16.9971	17.035	16.9826	15.9438	15.7459	15.9158	16.8679	16.7443	17.3913	17.0844	17.3746	16.261	16.7674	17.3293
Cbln3	14.1193	14.0717	14.3516	14.3573	14.5193	13.4751	13.0727	13.8135	14.3071	14.2866	14.9782	14.3009	14.964	13.7789	14.1826	15.0109
Cbln4	13.1722	13.4592	13.4379	13.4767	13.3809	12.4367	12.7392	12.793	13.2591	13.3232	13.7475	13.4475	13.7647	13.244	13.2964	13.3976
Cbr1	18.5993	18.7032	18.6315	18.7114	18.61	18.8607	19.0465	18.9607	18.5366	18.5797	18.6353	18.7472	18.645	18.8815	18.5475	18.5568
Cbr2	17.4114	17.4044	17.2526	17.1972	17.1691	16.0783	16.1845	16.9017	16.8807	17.151	17.3704	17.1044	18.0148	17.697	17.8543	17.9791
Cbr3	17.0395	17.0199	16.9678	17.0527	16.9602	16.8547	16.6629	16.7917	16.7552	17.063	16.945	17.1271	17.2624	17.4592	16.9858	16.9905
Cbr4	16.5969	16.5494	16.4844	16.6385	16.4605	16.6621	17.2659	16.6806	16.4792	16.7398	16.6072	16.7288	16.8138	16.8982	16.7059	17.0246
Cbwd1	14.486	14.5269	14.4808	14.3904	14.3434	14.4457	14.6319	14.4803	14.365	14.3729	14.3284	14.4104	14.1511	14.7558	14.3294	14.2785
Cbx1	18.9458	18.9417	18.9356	19.0043	19.0632	18.8884	18.9584	18.8339	19.1216	18.9645	18.8512	18.9792	18.3669	17.7874	18.6732	18.3509
Cbx3	18.7912	18.768	18.9293	18.8937	18.9677	18.8405	18.7829	18.7842	19.0718	18.8187	18.9108	18.8494	18.3357	17.7994	18.4746	18.2118
Cbx5	19.0669	19.0108	19.0505	19.0473	18.9837	18.8674	18.6913	19.0089	19.3199	18.9986	19.165	19.0679	18.54	17.9684	18.7493	18.474
Cc2d1a	14.2591	14.0671	13.845	14.0024	14.0521	14.5983	14.4997	14.1753	14.0746	14.0594	14.0801	14.1406	14.1507	14.4111	14.2311	14.3362
Cc2d1b	15.1584	15.3595	15.3708	15.539	15.4303	15.8342	15.843	15.8252	15.3177	15.196	15.1639	15.2937	15.6827	15.6789	15.452	15.8838
Ccar1	17.0888	17.1081	17.0113	17.1171	16.8523	16.8997	17.061	17.3115	17.1023	17.0046	16.9549	17.0947	16.8891	16.8929	16.8281	16.5667
Ccar2	19.1477	19.0228	19.0123	18.8335	18.9585	19.0664	19.0917	18.926	18.9765	19.1093	19.0009	19.0293	19.1157	19.03	18.9562	18.8482
Ccdc102a	12.6552	12.566	12.5072	12.6553	12.6647	13.1879	12.7506	12.8122	12.8735	12.8387	12.8972	12.8154	12.2663	12.7727	12.8906	12.3394
Ccdc12	13.8799	13.4963	13.3525	13.5515	13.448	14.2217	13.6199	13.3622	13.567	13.597	13.6811	13.5149	13.7294	14.219	13.7334	13.9286
Ccdc124	16.2734	16.1485	16.0625	16.2941	16.0587	16.5847	16.1884	15.8388	16.0247	16.3011	16.117	16.8369	17.2665	17.7235	16.4755	16.2342
Ccdc127	16.1507	16.161	16.2408	16.2084	16.1999	16.1681	16.1235	16.0623	16.2228	16.1547	16.3	16.2672	16.1366	16.3444	16.3684	15.9992
Ccdc134	14.6386	14.8289	14.5472	14.6701	14.6577	14.2112	14.0148	14.722	14.5682	14.6717	14.8054	14.7797	14.3253	14.3176	14.8334	14.714
Ccdc137	14.8087	14.8079	14.5659	14.6247	14.6641	14.9515	12.8209	14.5646	14.5728	14.8093	14.7271	14.6692	14.7422	14.4904	14.4713	14.4636
Ccdc186	16.774	16.8862	16.8615	16.5851	16.738	16.7909	16.6136	16.4891	16.3664	16.64	16.5332	16.4557	17.8287	17.0694	16.9573	17.2983
Ccdc22	17.9149	17.9156	17.8372	17.9575	17.9694	17.9504	17.8852	17.9082	17.8669	17.6375	17.7173	17.8693	17.833	17.7506	17.7726	17.7987
Ccdc43	12.7979	13.1022	13.1086	13.171	13.2585	13.2876	12.8474	13.0303	13.2743	13.0511	13.0492	13.0683	12.8227	12.6856	12.8963	12.9392
Ccdc47	18.28	18.2575	18.1497	18.2312	18.3101	18.353	18.3479	18.4212	17.9748	18.2838	18.0712	18.1917	18.4848	18.0129	18.55	18.3243
Ccdc50	15.5299	15.3926	15.4333	15.1342	15.4125	15.3798	15.0501	15.2118	15.2838	15.2936	15.3451	15.4045	15.192	15.2606	15.3635	15.3383
Ccdc51	13.4173	12.9932	12.9346	12.817	12.5654	13.8467	13.301	12.8832	13.1485	13.0875	13.1392	13.0484	13.2523	14.2031	13.4612	13.3548
Ccdc58	16.8196	16.8805	16.7584	16.7467	16.575	16.4225	17.1909	17.2498	16.6348	16.7676	16.8481	16.4564	16.9768	16.9214	16.878	16.8077
Ccdc6	15.8888	16.1146	16.1956	16.134	16.2805	16.3466	16.276	16.4176	16.1181	15.8718	16.1379	16.3194	15.8713	15.9535	16.0501	16.4801
Ccdc88a	11.8598	12.0002	12.0163	11.9839	11.9737	12.722	12.9639	12.1724	12.2587	11.8847	12.1588	12.1479	12.0094	13.0004	11.9007	12.7741
Ccdc9	14.5354	14.62	14.5653	14.7308	14.6966	15.1239	15.1323	14.8569	14.7536	14.5684	14.7112	14.9335	15.2219	15.7219	14.6568	14.646
Ccdc90b	17.4966	17.5618	17.6573	17.6214	17.5758	17.184	17.2207	17.3826	17.3665	17.4927	17.5519	17.3817	17.2592	16.889	17.2212	17.1124
Ccdc91	16.2455	16.0999	16.1734	16.208	16.1642	16.2237	16.3029	16.0948	16.2589	16.1597	16.2152	16.3538	16.0608	15.7454	16.0065	15.9773
Ccdc93	17.4366	17.3474	17.3328	17.2148	17.3802	17.316	17.6025	17.3194	17.2478	17.3971	17.1828	17.287	17.0909	16.9791	17.162	17.043
Ccdc97	12.207	12.0353	11.9998	12.1324	12.0114	12.4883	12.5679	12.1632	12.3071	12.0378	12.1756	12.1789	12.4936	12.7223	12.1059	12.1565
Ccnb2	17.0854	18.0045	18.2169	18.2715	18.1102	16.2072	17.379	17.549	18.1316	18.1581	18.0719	17.6802	15.9396	14.942	16.6784	16.5322
Ccnk	13.537	13.5449	13.4177	13.281	13.1649	13.703	13.9656	13.6213	13.3087	13.4372	13.4353	13.5553	13.2815	14.1069	13.5087	13.4196
Ccnl1	14.2026	14.279	14.2102	14.6115	14.4058	14.1891	14.105	14.6429	14.4774	14.252	14.1531	14.3907	14.5373	14.094	14.2626	14.5567
Ccny	17.3741	17.2914	17.3892	17.3369	17.295	17.0478	17.0887	17.1334	17.4782	17.4266	17.3925	17.3281	17.0715	17.263	17.2048	16.9521
Ccpg1	11.8697	11.8396	11.9862	12.0237	12.0198	12.2866	13.1619	12.1793	12.3488	11.8704	12.2098	12.0428	12.3386	12.7452	12.9325	12.5642
Cct2	20.9276	20.9374	20.9624	20.9865	21.0295	20.9531	21.1277	20.9644	20.9427	20.8663	21.0096	20.9478	21.1067	21.1819	21.0104	21.2061
Cct3	20.7946	20.6915	20.6843	20.607	20.7676	20.6364	20.8403	20.5866	20.7188	20.6699	20.7792	20.7307	21.0092	21.1181	20.9092	21.165
Cct4	19.7759	19.9032	19.9285	19.8753	19.9103	20.041	19.9283	19.8605	19.9769	19.8131	19.8938	19.9372	20.275	20.5846	20.1757	20.4696
Cct5	20.5553	20.6289	20.5821	20.5754	20.6091	20.5944	20.7395	20.6071	20.5547	20.4982	20.6198	20.5196	20.8128	21.0897	20.8654	21.083
Cct6a	20.7081	20.7988	20.8247	20.7985	20.857	20.9686	21.0303	20.916	20.8662	20.6497	20.8633	20.7698	21.0171	21.3884	20.9172	21.3417
Cct7	20.8118	20.8878	20.8908	20.9406	20.8892	20.8984	20.9099	21.0344	20.9749	20.7362	20.9239	20.8297	21.0896	21.4126	21.0519	21.4486
Cct8	21.2768	21.2747	21.2447	21.1838	21.3049	21.4429	21.3344	21.3531	21.3163	21.1543	21.2843	21.2808	21.6164	21.8581	21.505	21.7538
Ccz1	16.8355	16.8884	16.9338	16.8325	16.9665	16.8637	16.846	16.9072	16.7524	16.8511	16.9051	16.7199	16.8916	16.2572	16.9474	16.978
Cd151	18.803	18.8626	18.7638	18.7727	18.7245	18.6448	18.4553	18.8174	19.0688	18.8603	18.5984	18.7068	19.1069	18.2396	19.1522	19.3263
Cd200	18.843	18.9143	18.8078	18.878	19.0539	18.9755	18.4142	18.7643	19.1363	18.9047	18.9397	18.9459	19.2398	19.2013	19.3828	19.2974
Cd2ap	20.1214	19.9374	19.9436	19.8536	20.0291	19.9853	19.8868	19.8163	19.8246	20.0927	19.8331	19.8969	19.5526	19.2225	19.6124	19.5155
Cd2bp2	13.9842	13.7967	13.8283	13.7686	13.8047	14.1398	13.9846	13.7268	13.7781	14.0249	13.9476	13.7358	13.9188	13.8308	13.7356	13.7071
Cd34	18.7804	18.5244	18.6394	18.6335	18.7756	19.0131	18.3982	18.9546	18.7871	18.7203	18.7361	18.8392	18.8867	17.9308	19.1415	19.0623
Cd36	13.9259	13.6589	13.664	13.8474	13.7108	13.4851	14.4675	13.3205	13.6131	13.6131	13.6688	13.5768	14.2722	14.234	13.8625	13.869
Cd38	14.9131	14.7079	14.5469	14.5592	14.3666	14.4997	14.5514	14.7606	15.0889	14.7193	14.2453	14.4524	15.0909	14.5247	14.8802	15.383
Cd40	14.899	14.6586	15.0284	14.8761	14.7929	14.6483	14.6539	14.6818	14.9015	14.5831	14.7411	14.6901	14.7602	14.1719	14.8435	15.1159
Cd47	18.9429	19.2651	19.4565	19.6416	19.5828	19.2481	19.5437	19.1893	19.1633	19.0349	19.1313	19.2912	19.2921	20.0091	19.3088	19.4896
Cd59a	14.9013	15.2565	15.4314	15.2675	15.4265	15.7877	15.3343	15.2748	15.4281	15.1108	15.374	15.3784	14.5121	15.2337	14.9522	15.1858
Cd63	13.8767	14.0502	13.8028	13.8781	14.1964	14.1277	14.2456	14.1321	14.1285	13.8469	14.0756	14.0802	14.4111	14.4789	14.3546	14.7642
Cd81	16.8577	16.9258	17.2245	17.1012	17.1123	17.1227	16.8057	16.8003	16.8516	16.9609	17.2154	17.0981	18.0214	19.0495	17.9395	17.9965
Cd82	17.0044	17.4025	17.7324	17.476	17.688	18.206	18.1966	17.4972	16.79	16.7757	17.6366	17.449	17.7192	19.8224	17.7517	17.6494
Cd9	16.8394	16.9045	16.9863	17.0085	16.9315	17.8163	17.9482	17.7029	16.4871	16.9915	16.9437	16.9075	18.1071	19.3394	17.903	18.4977
Cd93	14.9397	15.0509	15.5626	15.3295	15.4838	15.1699	15.3955	15.2535	15.5345	14.8769	15.5533	15.2783	15.0144	15.2043	15.2878	15.5249
Cd97	15.996	16.1802	16.1243	15.9768	16.0143	15.3859	15.5576	15.9284	16.0126	16.243	15.9697	15.9812	16.3758	15.4064	16.5555	16.7599
Cdc16	16.7839	16.7662	16.7073	16.8991	16.7279	16.8047	16.7885	16.9915	16.9492	16.791	16.8229	16.6765	16.7834	16.8467	16.7933	16.6261
Cdc23	14.7945	14.8519	14.8656	15.0341	14.8279	15.1225	14.7911	15.1241	15.0937	14.7673	14.8613	14.8837	14.9862	14.6142	14.917	14.651
Cdc26	15.0027	15.5015	15.7351	15.1789	15.3949	14.861	15.0388	14.9025	15.7318	15.2634	15.5772	15.223	15.6331	14.953	15.2527	14.9888
Cdc37	18.7546	18.9272	18.9583	18.9489	18.9581	18.8287	18.7645	18.7428	18.9375	18.8528	18.9705	18.8273	18.5806	18.5585	18.6141	18.7215
Cdc37l1	12.4024	12.4585	12.5396	12.3731	12.558	12.5322	12.6533	12.4138	12.7254	12.5712	12.427	12.6834	12.9103	12.9011	12.4968	12.6504
Cdc40	16.6018	16.555	16.5991	16.6502	16.5921	16.6599	16.5232	16.7103	16.5799	16.6392	16.5294	16.5564	16.6392	16.9336	16.7373	16.8143
Cdc42	19.979	20.0358	20.1656	19.9541	20.1841	20.0728	19.9558	19.7846	20.2007	19.9921	20.0863	20.0993	19.9021	19.9859	19.9735	20.0007
Cdc42bpa	17.4879	17.579	17.6858	17.7304	17.7105	17.4647	17.6397	17.4605	17.0283	17.308	17.1442	17.295	17.1352	17.4231	17.3279	17.3052
Cdc42bpb	20.0615	20.0835	20.1115	20.1385	20.1399	20.0668	20.0325	20.1748	20.2425	20.1035	20.0931	20.1496	19.9274	19.6439	20.0103	19.9961
Cdc42ep1	17.0216	17.057	16.942	16.6842	17.0112	17.1106	16.8395	16.6695	16.7782	16.9389	16.8357	16.9754	16.5146	16.941	16.6934	16.7036
Cdc42ep4	18.0816	17.9897	17.9388	17.7065	17.8937	18.0532	17.2192	17.5279	17.6738	18.0717	17.8313	17.9103	18.0758	17.4788	18.0663	17.976
Cdc5l	18.1408	18.0648	18.0511	18.0291	18.0081	17.9586	18.0607	17.9167	18.1173	18.2566	18.0751	18.0967	17.8193	17.533	17.8436	17.7306
Cdc73	15.2866	15.1664	15.1196	15.1836	15.2028	14.8351	15.1129	15.1847	15.1962	15.2839	15.239	15.0935	15.0864	14.5623	15.022	14.8861
Cdh10	12.2714	11.7956	11.7467	11.7509	11.7914	12.5133	12.3954	12.5184	12.0492	12.2648	12.015	11.8586	12.147	12.8406	12.7777	12.0538
Cdh13	13.6271	12.989	13.1678	12.9452	13.4284	13.5801	13.0771	13.2598	13.607	14.0152	13.5281	13.3122	13.1515	13.0631	13.4083	13.4223
Cdh2	14.3034	14.1337	14.0212	14.194	14.2343	13.6915	14.0691	14.2362	14.0532	14.2219	14.3014	14.3056	14.867	15.3122	14.6663	14.6075
Cdh5	20.5664	20.4014	20.3423	20.2259	20.377	20.3232	20.1968	20.1581	20.5721	20.7207	20.4306	20.4327	20.1898	19.3967	20.3045	20.126
Cdipt	16.9766	17.0249	17.1256	17.0603	17.1059	16.7092	16.2277	17.0121	16.9946	16.8653	17.0684	17.2936	16.8243	16.2436	17.1372	17.1196
Cdk11b	15.8634	15.7055	15.6012	15.6063	15.6488	15.4174	15.5231	15.5046	15.8537	15.6741	15.7834	15.7766	15.3563	14.7617	15.4732	15.2266
Cdk13	12.0878	12.1165	11.9539	12.1388	12.1032	12.3614	12.4221	12.1177	12.3244	12.1204	12.2951	12.0426	11.9337	12.7319	11.9916	12.1545
Cdk17	19.0895	18.9572	19.1321	19.1874	19.1883	19.2476	18.9289	19.2941	19.3112	19.1332	19.0592	19.0658	18.921	18.9884	18.91	18.9333
Cdk19	14.3981	14.4284	14.5134	14.354	14.5023	14.8409	14.4594	14.182	14.4123	14.3144	14.3389	14.563	14.9331	14.3353	14.4484	14.5045
Cdk2	17.158	17.4199	17.2814	17.2779	17.3103	16.9971	16.9026	17.0574	17.1758	17.2721	17.0477	16.9094	17.1634	16.7697	17.1975	17.3026
Cdk4	13.5949	13.482	13.4556	13.5777	13.6629	13.5689	13.0998	13.5729	13.5611	13.8083	13.4998	13.9073	14.6772	14.5927	13.539	13.65
Cdk5	16.5423	16.4287	16.4628	16.4241	16.4831	17.2579	16.7914	16.8842	16.2306	16.4297	16.5467	16.5745	16.9751	17.6237	16.9786	17.1826
Cdk5rap3	14.534	14.203	14.0915	14.2366	14.1908	14.5195	14.7237	14.5368	14.1191	14.1875	14.2442	14.4216	13.9842	14.8497	14.3248	14.2925
Cdk6	12.7274	12.7521	12.5622	12.5854	12.5575	12.6369	12.5081	12.2635	12.8086	12.5506	12.6723	12.8336	12.3461	12.7117	12.8519	12.5508
Cdk9	14.1488	14.0575	14.2488	14.1923	14.2264	13.8105	14.3798	13.6791	14.3542	14.1778	14.2894	14.3513	14.058	12.8031	14.1802	13.7561
Cdkn1b	15.3266	15.4817	15.3128	15.3885	15.4632	15.6797	15.2585	14.9812	15.5296	15.3151	15.2644	15.5851	15.7991	16.2796	15.5488	14.9248
Cdkn2aip	16.8341	16.9437	16.8964	16.951	16.974	16.9433	17.1051	17.0815	16.8825	16.922	16.8348	16.858	16.6249	16.2311	16.7228	16.5682
Cds2	17.5582	17.5509	17.479	17.5574	17.4978	17.4593	17.382	17.4248	17.5662	17.6987	17.4847	17.4225	17.5991	17.3727	17.5808	17.6133
Cdv3	17.4414	17.55	17.5184	17.4645	17.5596	17.5583	17.6667	17.7901	17.6953	17.463	17.5364	17.5651	17.3281	17.3436	17.3943	17.4426
Ceacam1	17.6938	17.5472	17.632	17.396	17.7159	17.8539	17.4053	17.5427	17.6702	17.5736	17.5409	17.7088	16.8468	15.1114	17.3835	17.2336
Ceacam2	11.8113	11.8331	11.8657	12.0759	11.8041	12.4839	13.0022	12.1088	12.0372	11.8459	12.0484	11.8221	12.1396	13.8724	12.4678	12.5061
Celf1	17.1813	17.3794	17.4127	17.4668	17.5279	17.2522	17.4053	17.6928	17.2068	17.1644	17.1797	17.1181	16.9489	16.4659	17.2692	17.1547
Celf2	13.8593	13.5163	13.4759	13.6321	13.6479	12.8133	13.7202	13.7126	13.6875	13.8843	13.9644	13.9718	14.5742	15.0889	14.457	14.2661
Cemip2	17.0469	17.0618	17.0245	17.1468	16.9623	16.94	16.885	17.0588	17.045	17.1034	16.9652	17.133	17.1659	16.9319	17.1828	17.0763
Cend1	13.575	13.8294	14.4184	13.8825	14.3233	14.7828	14.6929	14.2943	13.4548	13.1504	14.2481	13.6906	14.8572	16.1115	14.2085	15.2469
Cenpa	11.7983	12.0145	11.9703	11.8158	11.9015	12.8334	12.631	12.1901	12.242	11.8912	12.0461	11.962	13.3589	13.4286	13.1053	12.9281
Cenpv	19.4137	19.1701	18.9227	19.4626	18.8824	19.0013	18.9969	18.9809	19.0889	19.9551	19.1744	19.1484	19.3316	20.1837	19.2568	19.3706
Cep135	17.5609	17.5485	17.7154	17.6899	17.5926	17.8324	17.8313	17.7488	17.7345	17.6958	17.5971	17.7959	17.4395	17.8787	17.6358	17.4338
Cep170	14.6704	14.703	14.6419	14.6748	14.6724	14.9088	14.6712	14.5279	14.6544	14.7645	14.8607	14.6019	14.8338	14.7454	14.8919	15.0198
Cep250	13.6717	13.5376	13.5462	13.5882	13.4364	13.2016	13.0972	13.6238	13.5625	13.6446	13.6184	13.5314	12.9429	12.8583	13.3413	13.1485
Cept1	16.1282	16.0934	16.1578	16.225	16.0197	16.2164	16.3053	16.302	16.3352	16.3068	16.1581	16.165	15.8896	15.3844	16.0885	16.226
Cers2	16.8375	16.5011	16.4739	16.5875	16.5831	17.2403	17.1364	16.9478	16.6446	16.6998	16.6536	16.7151	16.7386	16.9047	16.9283	16.9035
Cert1	19.017	18.9271	19.011	19.0357	19.1135	18.9715	18.8242	19.098	19.1338	18.9266	18.9634	19.0101	18.4495	17.5162	18.599	18.5537
Ces1c	17.0254	16.9901	17.0833	16.959	17.1087	17.3665	16.6247	17.1422	17.0948	17.0214	17.2656	17.2129	16.3559	14.8999	17.0085	16.559
Ces1d	18.7574	18.9845	18.8611	18.9587	18.5973	18.8871	20.7536	18.7345	18.2535	18.3489	18.4837	18.2768	18.9853	20.1875	18.4299	17.9977
Ces2c	14.1417	14.201	13.9055	14.0542	14.0008	15.0818	15.4143	14.2595	13.7317	13.9948	13.6888	13.9763	14.1374	14.7415	14.2501	13.9282
Cetn2	15.987	16.0698	15.8962	16.0564	15.9827	15.7352	16.1104	15.9813	15.8147	16.0065	15.8858	16.0036	16.137	15.8853	16.108	16.1804
Cetn3	12.6765	12.6267	12.5124	12.4611	12.6687	12.8482	12.901	12.9682	12.8112	12.6042	12.9096	12.6963	12.51	13.0336	12.5935	12.6465
Cfap20	13.8985	13.9205	13.9884	14.0535	13.9379	13.9693	13.9984	14.0919	13.9817	13.9474	14.0294	14.0463	14.2181	14.5497	14.0548	14.3253
Cfap36	16.1179	16.196	16.2217	16.0123	16.1212	16.142	16.3996	16.2185	15.7949	16.0967	16.0324	16.0433	16.1996	16.3296	15.9971	16.2891
Cfdp1	16.3649	16.3524	16.3878	16.4319	16.4838	16.2098	16.6995	16.1085	16.4132	16.2664	16.3482	16.3411	16.0852	15.3862	16.1054	15.7753
Cfh	15.533	15.3527	15.2834	15.3583	15.3314	16.1491	15.9113	15.5906	15.4068	15.3584	15.3446	15.3301	15.493	15.4475	15.5462	15.7038
Cfl1	22.2669	22.2501	22.1746	22.2168	22.3509	22.3889	22.0225	22.3778	22.1332	22.2542	22.1609	22.0266	22.5742	22.5046	22.5197	22.8001
Cfl2	17.9967	18.2415	18.312	18.2997	18.3976	18.3894	18.6938	18.3224	18.0247	17.8417	18.1086	18.095	18.1461	18.6071	18.2398	18.3948
Cggbp1	17.8544	17.8788	17.8358	17.7456	17.8824	17.9021	17.6395	17.5765	17.8487	17.8932	17.6277	17.7992	17.6268	16.7802	17.6947	17.2614
Cgnl1	20.8223	20.7487	20.834	20.8363	20.8764	20.8565	20.7505	20.9399	20.9944	21.1832	20.8142	20.8282	20.1418	19.1675	20.3508	20.0154
Champ1	15.0128	15.0076	15.1073	14.6109	14.8898	15.0153	14.9978	14.4752	14.9854	15.0731	15.1948	15.1348	15.0677	15.1697	14.7803	14.65
Chchd2	14.5238	14.3176	14.4869	14.2426	14.3667	14.7457	14.3705	14.3745	14.3465	14.2217	14.6428	14.4977	14.4602	14.2515	14.4849	14.447
Chchd3	19.4666	19.4205	19.4846	19.312	19.4783	19.6744	19.9334	19.5793	19.2474	19.5543	19.4961	19.5439	19.5682	19.7542	19.7349	19.8448
Chchd4	12.4954	12.5079	12.5052	12.3837	12.5227	12.3591	12.7829	12.5778	12.623	12.2781	12.8619	12.4006	12.2936	12.716	12.3273	12.492
Chchd6	16.419	16.5175	16.3516	16.2046	16.1829	17.1913	17.3535	17.0436	16.2481	16.3641	16.2566	16.5609	16.9945	18.1591	16.7848	17.349
Chchd7	12.96	12.8669	12.9652	12.9632	12.9918	13.2085	12.8565	13.0651	13.1192	13.0874	12.8098	13.0485	12.4393	13.1062	12.9117	12.8462
Chd2	13.6287	13.3258	13.259	13.1901	13.0937	12.5802	13.0266	12.9513	13.5912	13.1932	13.3374	13.3815	12.7911	12.8456	13.4224	13.7583
Chd4	19.6613	19.6649	19.6428	19.7524	19.6389	19.4371	19.533	19.6828	19.6195	19.655	19.7095	19.6395	19.4006	19.1254	19.5448	19.3285
Cherp	18.13	18.1147	18.1563	18.1846	18.1153	18.3843	18.1133	18.149	18.2663	18.2023	18.2566	18.2123	18.1462	17.7655	18.0551	17.8448
Chga	12.1051	12.6061	12.2199	12.3604	12.1566	12.8174	13.1268	12.9936	12.343	12.0878	12.4613	12.0636	12.8765	14.2904	12.3746	11.9306
Chid1	15.9346	16.3786	15.9881	16.0889	16.0439	15.9699	16.3947	16.5482	15.9785	16.2082	16.0927	16.2486	16.2707	15.912	16.2727	16.4086
Chil3	14.4533	14.8335	13.6997	14.4084	13.9772	13.9094	13.5085	14.721	13.9516	14.3021	14.9348	13.6553	14.4821	15.0827	14.6636	14.4198
Chkb	14.8366	14.7778	14.9503	14.7735	14.9236	14.4661	14.6244	14.7512	14.8649	14.6578	14.8544	14.6531	14.9017	15.1739	14.6742	15.0075
Chm	11.8146	11.8153	11.915	12.0477	11.8515	12.3217	12.7227	12.6572	12.1915	11.8447	12.0436	12.0253	12.0635	12.7949	11.8265	12.2905
Chmp1a	17.7683	17.5807	17.5914	17.6424	17.5686	17.5211	17.7918	17.5933	17.587	17.6533	17.5691	17.5552	17.4658	17.7703	17.7608	17.9858
Chmp1b1	17.4041	17.4817	17.3887	17.4539	17.5656	17.3865	17.459	17.6195	17.5042	17.4583	17.4315	17.3762	17.429	17.1578	17.5616	17.4546
Chmp1b2	14.2135	14.0441	14.2216	13.9974	14.0991	13.2703	13.6636	13.5895	13.684	13.7571	13.8541	13.8121	14.8727	15.1944	14.9674	15.8517
Chmp2a	16.0418	16.1448	16.0242	16.0189	16.0615	16.2917	16.1698	16.009	16.2711	16.0429	16.1174	15.9316	15.8107	16.0808	16.2027	15.9877
Chmp2b	16.6506	16.7849	16.8887	16.7883	16.7927	16.7935	15.3878	16.3562	16.9206	16.8104	16.8061	16.8469	16.7298	16.8983	16.7579	16.8089
Chmp3	17.2507	17.5382	17.4326	17.5022	17.5484	17.4583	17.3089	17.6516	17.4423	17.4182	17.3081	17.2736	16.9906	17.2475	17.4529	17.1811
Chmp4b	18.1989	18.3149	18.2796	18.3287	18.2627	18.4805	18.4677	18.4265	18.2485	18.106	18.1498	18.0442	18.1561	18.5143	18.4264	18.6287
Chmp5	16.647	16.7906	16.751	16.6203	16.6824	16.2856	16.6257	16.6474	16.8114	16.7792	16.5171	16.7458	16.2642	16.8497	16.5795	16.554
Chmp6	15.6139	15.5538	15.4299	15.3735	15.4995	15.1853	14.9041	15.196	15.5887	15.5132	15.3974	15.2799	15.8916	16.334	15.7231	15.5102
Chmp7	15.5374	15.5098	15.5333	15.7086	15.6676	15.6423	15.812	15.7835	15.5904	15.3365	15.5261	15.6553	15.4874	15.7478	15.5303	15.3082
Chn2	16.0704	15.8603	15.8823	16.0718	16.0961	16.0559	15.7924	15.5497	16.2673	16.1	15.9152	16.5036	16.1661	15.7726	15.6951	15.9961
Chordc1	17.3955	17.4948	17.4113	17.2357	17.3845	17.4531	17.2289	17.1851	17.5176	17.4006	17.339	17.523	17.4249	17.4186	17.374	17.2801
Chp1	17.3835	17.3008	17.4366	17.4694	17.4516	17.5314	17.5179	17.4289	17.4498	17.4177	17.3177	17.2678	17.2004	17.6138	17.4041	17.4334
Chtop	16.9174	16.6737	16.5904	16.3881	16.6775	16.469	16.523	16.2738	16.6079	16.927	16.8081	16.7033	16.1361	15.8944	16.5415	15.87
Chuk	15.3323	15.1686	15.1816	15.3579	15.3565	14.7247	15.2653	15.2846	15.3895	15.3076	15.388	15.3794	14.7071	15.5593	14.9179	15.2153
Ciao1	14.2387	14.1362	14.0947	14.1872	14.1464	14.4966	14.5275	14.2816	14.2279	14.1967	14.1596	14.2382	13.9376	14.1393	14.2302	14.2795
Ciapin1	16.6889	16.7009	16.5343	16.4351	16.5914	16.6019	16.8063	16.6133	16.5567	16.4979	16.4984	16.5442	16.3015	16.3313	16.5585	16.7491
Cib1	14.892	15.1505	15.2118	15.1816	15.2103	14.9282	15.0061	15.0705	15.2619	15.1029	15.2697	15.2191	14.7022	15.4608	15.0102	14.8606
Cic	15.1622	15.1687	15.1277	15.251	15.2126	15.235	17.2925	14.9133	15.2526	15.2856	15.1954	15.1163	14.9078	14.5699	14.7856	14.7729
Cirbp	17.8147	17.7663	17.5003	17.5753	17.7662	17.8445	17.4051	17.5526	17.2838	17.8487	17.6324	17.3756	17.597	17.5204	17.7768	17.5499
Cisd1	20.1075	20.2763	20.323	20.19	20.2741	20.3578	20.625	20.4171	20.051	20.2004	20.2506	20.2078	20.4826	21.3147	20.4297	20.4329
Cisd2	17.9727	17.956	18.0319	18.0843	18.009	18.0666	17.8579	17.9378	18.1194	17.9328	17.9684	18.2884	17.986	18.1379	17.9187	17.8743
Cisd3	14.4726	14.5729	14.5948	14.893	14.5757	14.8577	15.4368	15.1891	14.4098	14.2503	14.4887	14.5199	14.868	15.254	14.9508	15.1831
Ckap4	20.3285	20.2315	20.1259	20.1603	20.078	20.6257	20.4172	20.3971	20.1825	20.2718	20.066	20.3352	20.7076	20.2386	20.4817	20.5692
Ckap5	19.7514	19.8825	19.8973	19.8696	19.9927	19.8792	19.9311	19.9147	19.7837	19.8724	19.9572	19.9077	19.9048	20.0387	19.8843	19.9415
Ckb	20.9616	20.7999	20.944	21.0349	21.0218	21.8022	21.6837	21.506	20.1685	20.5846	20.9393	20.9852	21.8739	22.9659	21.7236	22.2121
Ckm	15.7465	15.122	14.6251	15.5085	15.6157	12.6802	16.1655	15.4172	12.9853	14.0658	13.0928	14.6725	15.6174	16.4204	15.4976	13.4858
Ckmt1	17.6714	17.9715	18.4817	18.0635	18.6815	19.2874	19.4141	18.5437	18.1546	16.5585	18.5994	18.4414	19.2007	21.6551	19.1395	19.6234
Clasp1	17.9969	18.02	18.0559	18.1393	18.1129	17.9167	18.1614	18.1874	17.9548	17.8934	18.044	17.9462	18.4662	18.3655	18.2631	18.6855
Clasp2	18.7799	18.6978	18.7775	18.7796	18.7432	18.9349	18.5335	18.7258	18.6549	18.6281	18.7937	18.8438	19.2296	19.5731	19.0107	19.1881
Clcc1	17.3394	17.2041	17.2417	17.3262	17.2886	17.6179	17.2555	17.0191	17.3238	17.1844	17.2601	17.4292	17.8863	18.0448	17.5312	17.3182
Clcn4	11.893	11.9817	11.7815	11.7337	12.0041	12.6705	12.4735	12.0858	12.2717	11.9954	12.1776	12.0567	12.3821	13.2551	11.8847	12.0731
Clcn7	12.6997	12.3897	12.6397	12.5886	12.46	13.1016	12.7758	12.8578	12.8123	12.5755	12.6343	12.5849	12.3831	12.7182	12.443	12.4371
Cldn11	19.3497	20.06	20.7245	20.03	20.8378	21.7289	21.2687	20.2604	19.5962	16.9645	20.9888	20.6682	20.4639	23.8276	20.5446	19.8165
Cldn5	15.3203	15.2682	15.2895	15.2997	15.3784	14.8296	15.1771	15.3283	15.6797	15.4698	15.4249	15.3722	14.6818	14.1728	14.9525	14.2966
Cldnd1	14.9309	15.0983	15.2419	15.1443	15.2166	14.8596	14.9022	14.6334	15.2066	14.7868	15.0619	15.1736	15.2956	15.8488	15.2032	15.2245
Clec16a	13.998	14.2286	14.2143	14.2706	14.233	14.5296	14.4393	14.6185	14.1688	14.0554	14.0008	14.0783	14.4722	14.874	14.0319	14.5411
Clec2d	17.1493	16.9533	17.1467	17.0445	17.1217	16.9911	17.0811	16.9583	17.5095	17.2612	17.0583	17.1214	16.8811	15.6821	16.911	16.9284
Clec2l	14.3357	14.2252	14.4241	14.3244	14.6346	14.73	14.8945	14.2108	14.1891	14.1993	14.5782	14.4851	15.045	15.7335	14.512	14.8861
Clic1	20.0453	19.9133	19.8458	19.9305	20.0221	20.0232	19.857	20.1831	20.1191	20.03	19.9653	19.95	20.1369	19.368	19.937	20.1214
Clic4	21.4507	21.4629	21.6043	21.6753	21.6335	21.6921	21.5697	21.6057	21.4979	21.4876	21.5102	21.446	21.2852	21.0465	21.2783	21.1639
Clic5	20.5383	20.673	20.6313	20.7474	20.8546	20.4912	20.4784	20.3123	20.4021	20.6999	20.3977	20.6804	19.4273	19.294	20.2774	19.888
Clic6	18.8406	19.3707	19.1981	18.6633	18.6821	20.336	21.0222	20.934	18.7959	19.2179	18.7458	19.6695	18.472	17.7881	18.4863	17.907
Clint1	19.1966	19.2204	19.3592	19.3811	19.4417	19.2424	19.1084	19.1692	19.3698	19.1748	19.1532	19.1238	18.6568	18.3166	19.146	18.9244
Clip1	19.7155	19.7556	19.8183	19.8366	19.9038	19.9025	19.834	19.8401	19.801	19.7886	19.8737	19.7548	19.3948	19.1354	19.623	19.319
Clip2	16.3197	16.1324	16.3726	16.3296	16.371	16.3957	16.4588	16.4519	16.1799	16.0979	16.2855	16.3773	16.5212	17.3414	16.3556	16.9015
Cln5	12.475	12.3063	12.3551	12.4322	12.4156	12.3095	12.5986	12.5552	12.5354	12.3157	12.519	12.366	12.6859	13.1593	12.1402	12.0894
Clpb	14.5427	14.7138	14.8008	14.6931	14.6488	14.8895	14.9685	15.0227	14.6329	14.7451	14.8142	14.7889	14.9267	15.3479	14.9828	15.1072
Clpp	16.6905	16.7229	16.9149	16.5925	16.6881	16.8063	16.5538	16.5707	16.6236	16.7529	16.8236	16.7583	16.8971	17.093	17.0161	17.0233
Clptm1	16.3809	16.3545	16.1625	16.0328	16.1057	16.7829	15.7644	16.4121	16.0737	16.2396	16.3692	16.3216	16.5746	16.5824	16.3929	16.5132
Clptm1l	13.2602	13.6057	13.4517	13.4802	13.4769	12.8872	13.5657	13.3111	13.56	13.5632	13.5486	13.4108	13.3261	13.0517	13.54	13.6194
Clpx	16.1502	16.1165	16.2774	16.2245	16.2768	16.1838	16.8373	16.5637	16.2324	16.4118	16.2833	16.3355	16.5968	16.0723	16.4081	16.5719
Clstn1	15.0449	15.2432	15.1986	15.2065	15.2692	15.3804	15.1762	15.1401	14.9193	15.2308	14.954	15.4169	16.0503	16.0185	15.5995	15.4868
Clta	18.0053	18.1859	18.5545	18.3582	18.4958	17.9525	18.234	18.0155	18.6522	18.3342	18.5882	18.6539	18.2608	18.8029	17.9905	18.2829
Cltb	20.0784	19.9363	20.4258	20.3161	20.3147	19.9378	19.8783	20.0428	20.5868	20.4018	20.3332	20.5015	19.6752	19.3051	19.6912	19.4873
Cltc	24.0853	24.0858	24.0959	24.1151	24.1474	24.2128	23.9722	24.212	24.25	24.0945	24.1112	24.1424	24.2105	24.332	24.1237	24.2171
Clu	17.3572	17.3718	17.2186	17.3707	17.2282	17.962	18.0322	17.8101	17.5981	17.6664	17.4044	17.3668	17.7828	18.182	17.7381	18.0079
Cluh	13.2722	13.1519	12.9712	13.0874	13.1067	12.6367	13.2885	12.5461	13.2019	13.0127	13.0969	13.0415	13.5664	13.3455	12.3583	12.8036
Clybl	18.4765	18.4762	18.4226	18.172	18.2218	18.5807	19.2775	18.7752	18.0741	18.5551	18.2639	18.4887	18.6103	18.9497	18.5421	18.5098
Cmas	18.8358	18.8936	18.8237	19.0386	18.887	18.9069	18.8172	19.0557	18.8218	19.0421	18.905	18.9006	18.8044	18.7075	18.7664	18.7426
Cmc2	13.6674	13.6101	13.5816	13.7442	13.5634	12.7971	13.7599	12.9761	13.633	13.6507	13.6201	13.8022	13.297	12.9479	13.8787	13.7941
Cml1	15.0333	15.0986	15.1688	15.4935	15.238	15.2814	16.0027	15.3811	14.9612	15.3779	14.9452	15.3618	15.3224	14.979	14.9863	14.8506
Cmpk1	19.6421	19.6781	19.7058	19.7713	19.8581	19.7304	20.0502	19.6598	19.9397	19.5864	19.7064	19.7598	19.263	19.4529	19.483	19.528
Cmpk2	19.1635	19.1852	19.2424	19.2309	19.2538	19.1096	18.7763	18.7072	19.1422	19.1833	19.2323	19.399	18.6822	18.0023	18.5587	18.5773
Cmss1	13.5776	13.6076	13.73	13.6427	13.5447	13.6005	13.7129	13.4613	13.6611	13.707	13.6703	13.6144	13.8476	13.9017	13.4656	13.9901
Cmtm3	12.4238	12.3983	12.5073	12.3974	12.3571	12.7935	12.5124	12.5667	12.8604	12.4257	12.7546	12.5774	12.6478	13.0678	12.5405	12.7342
Cmtm6	16.275	16.0803	16.3687	16.4361	16.3744	16.2221	16.2782	16.1167	16.6432	16.334	16.6792	16.5054	15.3541	14.7224	15.8663	15.7965
Cmtm8	11.8564	11.9828	11.9287	11.9926	11.8673	12.2709	12.8616	12.3908	12.1024	12.0041	12.0832	12.0661	12.7645	13.2159	11.8077	11.9843
Cmtr1	17.3297	17.4894	17.3323	17.381	17.404	17.353	16.9729	17.4281	17.4881	17.3891	17.2841	17.3382	17.2522	16.7398	17.3542	17.1814
Cnbp	16.0841	16.0956	16.0332	16.1292	15.9907	15.3795	14.7331	15.1435	16.4655	16.4823	16.3719	17.034	17.3645	16.9092	16.44	15.9663
Cndp2	19.8731	19.844	19.7581	19.7463	19.8687	19.8534	19.9077	19.7879	19.7908	20.0007	19.8274	19.8454	19.8376	19.9804	19.7805	19.8142
Cnih4	14.9639	14.8963	14.9626	15.355	14.9681	14.5701	14.5576	14.9069	15.075	15.575	14.8843	15.2017	15.4154	14.33	14.9451	14.7325
Cnn1	17.2231	17.6894	17.2674	17.0909	17.139	16.9891	16.335	17.2075	16.222	17.2409	16.8452	16.6439	17.3802	17.5832	17.4372	17.5098
Cnn2	20.9912	21.0623	20.9191	20.7447	20.8627	20.7571	20.7049	20.7807	20.5889	21.0746	20.8534	20.8328	21.5827	21.0392	21.5799	21.9679
Cnn3	19.4144	19.4399	19.3246	19.2945	19.3723	19.2683	19.2578	19.4182	19.2008	19.3971	19.1816	19.3146	19.6467	19.4071	19.4678	19.2597
Cnnm2	14.0819	14.2857	14.1778	14.2642	13.8027	13.7296	13.8692	14.1892	13.6448	14.0154	14.0069	13.789	14.279	13.6583	14.2193	14.4493
Cnot1	17.8476	17.8827	17.8853	17.9631	17.7938	17.9966	17.6574	17.847	18.0283	17.9647	17.8429	17.8818	18.0944	17.9563	17.7993	17.9893
Cnot10	13.1557	13.1164	13.1064	13.267	13.0919	13.0351	13.3894	13.3536	13.3673	12.9916	13.3141	13.1634	13.5597	13.2548	13.3562	13.6772
Cnot11	14.432	14.255	14.3173	14.1173	14.2818	14.4801	14.1971	14.0525	14.2945	14.2194	14.4463	14.4781	14.58	14.5791	14.5198	14.25
Cnot2	14.8286	14.9365	14.8361	14.8652	14.7996	15.0587	14.6427	14.9017	15.0055	14.8757	14.8986	14.7926	14.7265	14.7507	14.9216	14.8613
Cnot3	15.1779	15.4497	15.3779	15.2892	15.4847	15.79	15.1	15.6248	15.4255	15.3374	15.345	15.4387	15.2036	15.3074	15.0042	14.8643
Cnot6l	13.4336	13.3769	13.381	13.4136	13.3472	13.761	14.1636	13.6275	13.6416	13.4193	13.6878	13.4642	13.5713	13.7669	13.4484	13.4385
Cnot7	14.412	14.087	14.617	14.2289	14.2692	14.8957	13.4534	13.4123	14.5751	14.2438	14.1888	14.5994	14.7568	15.0166	14.5766	14.8391
Cnot9	16.0094	16.2613	16.3358	16.1893	16.2464	16.1306	16.0293	16.1534	16.3981	15.9894	16.2999	16.405	16.2501	16.2728	16.302	16.4503
Cnp	22.2352	22.9015	23.7985	23.064	23.6741	24.3671	24.2225	23.374	22.4797	20.2588	23.814	23.6274	23.3972	26.625	23.5585	23.5047
Cnpy2	17.4084	17.2757	17.3739	17.373	17.3605	17.3928	17.2133	17.3683	17.4316	17.4301	17.3346	17.4237	17.3079	16.5256	17.3426	17.3702
Cnpy3	17.3162	17.2771	17.2149	17.3283	17.2363	16.9626	17.2768	17.2109	17.3171	17.1765	17.239	17.1419	17.2263	16.6302	17.1412	17.3232
Cnpy4	18.8266	18.7624	18.7453	18.6947	18.7379	19.0549	18.8637	18.903	18.7043	18.7218	18.6321	18.6397	18.574	18.3696	18.9007	18.8933
Cnrip1	14.8409	15.2329	15.2136	15.1944	15.4742	15.8406	15.7991	15.329	15.0691	14.9566	15.1579	15.1301	16.3538	17.2319	16.0089	16.446
Cntn1	17.5399	17.8527	18.3017	17.929	18.2745	18.8315	18.9348	18.0311	17.3484	17.0599	18.3991	18.2322	18.5906	21.2338	18.585	18.8283
Cntnap1	16.4833	17.0299	17.4784	17.1992	17.4067	17.765	17.7247	17.229	16.9751	15.9139	17.4858	17.2902	17.6536	20.2746	17.6012	17.7791
Cntnap2	14.9897	15.166	15.3431	15.1052	15.2735	15.1031	15.1889	15.0288	15.2291	15.0615	15.364	15.2948	15.8441	17.0536	15.7971	16.0278
Coa3	13.314	13.5719	14.4059	13.9482	13.7123	13.2038	13.5773	13.4992	14.1788	13.326	14.039	13.5467	13.2034	13.2004	13.0475	13.1549
Coa5	13.3162	13.2656	13.3405	13.1997	13.3557	13.163	13.3622	13.3349	13.4446	13.3832	13.4909	13.5637	13.6143	13.5734	13.0183	13.0994
Coa6	16.0395	16.0866	16.0183	15.9367	15.8787	15.9507	16.2788	16.1659	16.1314	16.209	15.9955	16.1891	16.2513	16.3756	16.2243	15.8951
Coa7	16.6308	16.5873	16.4921	16.2843	16.5194	16.6699	16.8151	16.571	16.64	16.745	16.5585	16.6076	16.3742	16.5306	16.4506	16.4881
Coasy	15.4533	15.2421	15.2952	15.2629	15.2402	15.224	15.9491	15.3259	15.213	15.3093	15.3031	15.3961	15.4217	15.8209	15.4513	15.3447
Cobll1	21.3251	21.2487	21.2087	21.1152	21.2481	21.2429	20.9166	20.9121	21.0686	21.3448	21.0976	21.1934	20.9473	20.2412	20.9892	20.7745
Cog1	16.4757	16.5521	16.5614	16.5312	16.4182	16.5714	16.7752	16.6877	16.4362	16.461	16.4815	16.5508	16.3834	16.3324	16.5842	16.473
Cog2	15.2957	15.3796	15.5354	15.3593	15.4676	15.6751	16.3138	15.3657	15.5495	15.3884	15.4039	15.5551	15.2428	15.4203	15.2638	15.0127
Cog3	15.341	15.2941	15.3691	15.4884	15.1316	15.0503	14.7528	15.4279	15.4191	15.4244	15.2724	15.3814	15.2934	15.1052	15.4785	15.5447
Cog4	14.4891	14.5509	14.5909	14.6368	14.3664	14.4145	14.3337	14.5455	14.6666	14.4483	14.5382	14.6226	14.2538	14.1274	14.3848	14.1857
Cog5	14.0372	14.1189	14.0036	13.9373	13.9122	13.9479	13.8741	13.9138	13.973	13.9124	14.0107	13.9874	13.8797	13.8958	13.854	13.8231
Cog7	16.0047	15.9582	15.9841	16.1331	16.0473	15.9789	15.6977	16.2088	16.251	16.1046	16.0767	16.1912	15.967	16.1124	16.0431	16.1255
Cog8	13.5254	13.2048	13.1742	13.2483	13.2876	12.6567	13.1555	13.5668	13.3243	13.336	13.4192	13.3971	13.3099	13.9072	13.2028	13.464
Col11a1	14.2302	14.2305	13.8219	13.9121	13.7834	14.6812	14.8734	14.9259	14.036	14.0685	13.8563	13.7915	15.1041	15.134	14.4683	15.3992
Col12a1	17.292	16.9171	16.6552	16.594	16.6515	16.178	16.3111	16.2423	16.424	16.9484	16.7072	16.9113	19.1218	18.0478	18.6021	19.3431
Col1a1	20.5332	20.251	20.0209	20.3366	20.0718	21.0853	21.352	21.3245	19.8806	19.9804	20.1121	20.2691	21.3795	21.4113	20.8483	21.8046
Col1a2	20.7395	20.1858	19.6963	19.9139	19.62	21.5277	21.7842	21.5106	19.5258	19.8742	20.0118	20.0459	21.9262	22.1376	21.2215	22.2015
Col24a1	17.414	17.2021	16.8269	17.0467	17.0107	17.9513	18.2923	17.9956	16.9423	16.8855	17.2048	17.1346	18.327	18.1497	17.8017	18.5951
Col3a1	16.0558	16.041	16.1027	16.1935	16.1629	16.6776	16.8955	16.8594	14.9875	15.6593	15.8085	15.9286	16.1752	16.5857	16.3541	17.2609
Col4a1	18.8396	18.9293	19.1514	18.9194	18.9874	17.4707	17.7222	17.428	18.7745	19.2208	19.2249	18.9223	21.8906	21.021	21.2837	22.0869
Col4a2	19.5148	19.3574	19.5682	19.2935	19.4729	18.543	18.4791	18.2741	19.4802	19.7676	19.4294	19.4363	22.7234	21.9706	22.2681	23.0094
Col4a3	12.7241	12.6645	12.5767	12.5376	12.4788	12.5468	12.5263	13.0307	12.7367	12.789	12.8503	12.8636	12.9815	12.847	12.6242	13.0196
Col5a2	14.2968	14.0219	13.9099	14.328	14.023	14.3455	14.491	14.6233	13.8372	13.8167	13.956	14.12	16.017	15.9556	15.212	16.3217
Col6a1	18.1368	18.3482	18.0836	18.2319	18.125	18.6161	18.5106	18.4663	17.4523	18.3456	18.0625	18.0973	20.1389	19.6311	19.6925	20.6842
Col6a2	17.7255	18.1751	17.8099	17.9055	17.9466	18.5651	18.6976	18.268	17.3442	18.0019	17.8936	17.8724	19.8339	19.0706	19.3038	20.3449
Col6a6	15.0074	14.6701	14.7269	14.7431	14.7395	14.4302	14.4966	14.3492	14.9674	14.8693	14.7468	14.6802	14.6772	14.0569	14.8426	14.6311
Colec12	12.9029	13.416	13.2719	13.1496	13.1463	13.3227	14.0852	13.7757	13.1037	13.3077	13.5732	13.489	13.8458	13.3633	12.7229	12.8088
Colgalt1	17.5233	17.4117	17.5208	17.5203	17.4938	17.3826	17.3842	17.5297	17.7593	17.4152	17.5161	17.4629	17.2654	16.0814	17.413	17.3711
Colgalt2	16.0646	16.0177	16.0435	16.0473	16.1892	16.1381	15.9327	16.3377	16.368	16.0828	16.1011	16.1987	15.5205	14.7963	15.8995	15.8024
Commd1	14.3523	14.439	14.5284	14.6692	14.4718	13.813	14.5151	14.8054	14.7096	14.6546	14.445	14.5251	13.8368	14.1878	14.2577	14.2001
Commd10	15.4097	15.5089	15.5155	15.4777	15.4718	15.5178	14.9555	15.2704	15.4401	15.0389	15.1492	15.7883	16.0933	16.3757	15.3817	15.0987
Commd3	17.0558	17.0368	17.1778	16.9898	17.1334	16.6148	16.3915	16.8836	17.1222	17.0546	17.0746	17.1997	16.9715	16.3787	16.804	16.5801
Commd5	15.4814	15.3852	15.4399	15.3556	15.4259	15.155	14.991	14.9801	15.588	15.3646	15.5209	15.4759	15.3145	15.4917	15.0586	15.2864
Commd6	15.8246	15.8956	16.1262	15.977	16.0471	14.9952	15.015	15.3872	15.8549	15.8511	16.0064	15.9518	15.484	15.6303	15.4011	15.1619
Commd7	15.451	15.5964	15.759	15.6512	15.6531	15.3548	15.3225	15.2991	15.8645	15.4099	15.7993	15.9368	15.2269	14.8702	15.2588	15.0393
Commd9	12.5341	12.5921	12.6253	12.8294	12.7396	12.7083	12.51	12.8066	12.9475	12.6562	13.0517	12.8745	12.7022	12.8707	12.3494	12.3107
Comt	17.535	17.523	17.4481	17.3539	17.2672	16.6702	17.7082	17.1112	17.1993	17.4099	17.52	17.3809	17.626	17.5144	17.5789	17.5058
Comtd1	14.831	15.0906	15.1264	15.3237	15.0912	15.2848	15.4065	14.9393	14.9401	15.1613	15.3671	15.4391	15.3069	16.4996	15.7191	15.297
Copa	20.7979	20.8288	20.7713	20.8412	20.7613	20.8702	20.8102	20.955	20.9533	20.743	20.7971	20.7924	20.6489	20.402	20.7576	20.8691
Copb1	20.2045	20.1327	20.0693	20.1484	20.096	20.152	20.2953	20.2555	20.1921	20.1515	20.1636	20.1177	20.2323	19.6344	20.1967	20.1558
Copb2	19.9259	19.8819	19.932	19.9197	19.9406	20.1117	20.2723	20.1088	20.0368	20.0017	19.9621	19.8866	19.6805	19.3705	19.7824	19.7446
Cope	17.963	17.7891	17.7049	17.7123	17.7082	18.0507	17.8146	17.7841	17.7467	17.7586	17.5559	17.8115	17.9609	17.2439	17.889	17.7212
Copg1	19.5941	19.6036	19.5999	19.6892	19.6005	19.4893	19.8689	19.688	19.7626	19.6164	19.5936	19.6252	19.3856	19.0368	19.4649	19.3654
Copg2	16.9204	16.8504	16.8353	16.9474	16.7879	16.9699	17.0963	16.8972	16.7048	17.2103	16.6874	16.886	16.8773	16.4847	16.7988	16.8119
Cops2	19.3831	19.4536	19.5168	19.5042	19.5027	19.3277	19.395	19.4065	19.4825	19.2605	19.4186	19.3733	19.4182	19.7185	19.3458	19.3838
Cops3	18.0922	17.9401	17.8758	17.7219	17.9213	18.2156	18.1188	17.9262	17.8416	17.8407	17.8636	17.8927	18.1745	18.7115	17.9485	18.0821
Cops4	19.1969	19.1876	19.1602	19.0294	19.1664	19.3126	18.9405	19.0752	19.0858	19.0489	19.0818	19.1205	19.3036	19.5563	19.1786	19.2641
Cops5	17.7636	17.6907	17.772	17.8339	17.7746	17.8362	17.6109	17.6206	17.7731	17.6471	17.7168	17.9017	18.2357	18.3884	17.9726	18.023
Cops6	17.7151	17.7065	17.6692	17.5952	17.6015	17.549	17.3456	17.4334	17.594	17.6385	17.6542	17.7232	17.9126	18.1891	17.8477	17.9646
Cops7a	15.7844	15.7941	15.8504	15.8669	15.9188	15.9619	15.5042	15.6243	15.7942	15.7593	15.7833	16.0668	15.6842	15.9695	15.8658	15.8251
Cops8	16.2574	15.9857	16.1337	16.0753	16.1145	16.2667	15.7993	15.9687	15.9301	16.2185	16.0662	16.0436	15.9992	15.5445	15.9003	15.5249
Copz1	16.032	15.976	16.1294	16.0256	15.9952	15.291	17.0091	16.0576	16.2318	16.0195	16.1921	16.235	15.9998	15.5448	15.8436	15.7249
Copz2	16.1147	16.0853	16.0293	16.1911	16.2323	16.0997	15.8741	16.2408	16.1585	16.1057	16.1534	16.1835	15.8201	15.6539	15.9665	15.7357
Coq8a	12.3481	12.2097	12.2627	12.2076	12.3235	12.2909	13.1371	12.2833	12.4744	12.0771	12.3787	12.3418	12.1254	13.3922	12.3489	12.5039
Coq9	17.6982	17.637	17.6045	17.503	17.6017	17.8624	18.3291	17.5037	17.4638	17.8015	17.6837	17.6495	17.7807	18.7855	17.6453	17.8972
Coro1a	16.2818	16.3774	16.2391	16.3019	16.3519	16.5063	16.2928	16.4283	16.6008	17.0612	17.055	16.9571	18.3324	18.6686	18.5798	19.4199
Coro1b	20.545	20.5824	20.4726	20.4343	20.4456	20.5011	20.348	20.3499	20.4665	20.4567	20.4982	20.3871	20.4848	20.1173	20.5847	20.7038
Coro1c	19.7988	19.8074	19.7429	19.6896	19.7354	19.8367	19.5368	19.7259	19.7232	19.9036	19.7176	19.6037	20.0132	19.9939	20.0544	20.3699
Coro2a	16.9369	17.1089	17.0677	17.1029	16.9219	17.0944	16.9571	17.151	16.9462	17.1614	16.9678	16.9024	17.0711	17.2766	16.9898	16.9834
Coro2b	18.2499	18.33	18.4193	18.3952	18.4773	18.4084	18.3379	18.2668	18.4717	18.398	18.4376	18.4369	18.5692	18.5668	18.4963	18.5467
Coro7	17.9366	17.799	17.7633	17.6798	17.7805	17.9262	17.6927	17.6874	17.803	17.7508	17.7652	17.7483	17.6938	17.5394	17.8074	17.7684
Cotl1	16.0495	16.4709	16.166	16.3601	16.254	15.5816	16.7056	16.835	16.4705	16.2415	16.9434	16.5485	17.5776	17.6278	17.624	17.9468
Cox15	13.8263	13.829	13.8455	13.8155	13.7247	13.1909	13.7647	14.0705	14.0567	13.9123	13.7036	14.0708	13.4597	13.1723	13.8338	14.0663
Cox18	13.8593	14.0338	14.1127	14.2038	13.9839	13.4989	13.9306	13.9722	14.1741	14.0354	14.1758	14.2572	13.7731	14.339	14.172	13.9153
Cox4i1	20.8945	20.5674	20.4136	20.3327	20.4686	21.5372	20.9473	21.2137	20.228	20.7541	20.3688	20.6456	21.1713	22.1377	21.0682	21.1748
Cox4i2	19.107	19.2211	19.0655	18.9093	18.9752	18.0765	18.0294	18.295	18.5709	18.9658	18.8354	18.8524	19.4051	19.1742	19.446	19.7984
Cox5a	20.0302	20.0581	20.2996	19.924	20.2256	19.5276	19.6602	19.5981	20.2226	20.0088	20.2082	20.284	19.9262	20.349	19.8611	19.7217
Cox5b	20.7178	20.6611	20.9217	20.4232	20.7753	20.4068	20.9694	20.6406	20.5797	20.6999	20.7736	20.823	20.8643	21.2077	20.7716	20.7784
Cox6a1	15.0695	14.9482	15.1215	14.8039	15.1446	14.6977	14.5172	14.9403	15.061	15.1191	15.1292	15.331	15.5512	16.0584	15.3832	15.1528
Cox6b1	19.087	19.25	19.4536	18.9944	19.2108	19.2537	19.4967	19.1096	19.117	19.0821	19.3356	19.1875	19.1518	20.1193	19.1757	19.3402
Cox6c	17.7962	17.9166	18.302	17.404	17.6453	17.6483	18.241	17.6759	17.7981	17.5439	17.7288	17.6858	18.7331	18.4475	17.4782	17.6603
Cox7a2	16.1311	16.6379	17.1922	16.5242	16.7032	16.0427	16.5159	16.3336	16.7034	16.2167	16.7335	16.7135	16.1184	16.3451	16.2989	16.0261
Cox7a2l	16.2373	15.9208	15.8803	15.6342	15.7885	16.4426	15.4704	16.2273	15.6644	16.149	15.9558	15.9845	16.4893	17.1926	16.3661	16.5996
Cox7c	17.7786	18.5624	18.9925	18.6273	18.4356	17.4297	18.6717	18.7591	18.6217	18.0953	18.6409	18.5074	18.496	17.7028	18.0224	18.2718
Cp	20.9091	20.8837	20.7967	20.7766	20.8471	20.9031	20.7169	20.7115	20.501	20.8709	20.6655	20.6148	21.4194	20.7696	21.4637	21.6003
Cpd	16.9452	16.8899	16.8645	17.014	16.8293	16.8629	17.1436	17.217	17.1265	16.7719	16.7913	16.7304	16.7657	16.8312	16.8198	16.7023
Cpe	17.5864	17.3369	17.0977	17.4095	17.2155	17.1358	17.3098	17.0736	16.5975	17.8689	17.1655	16.9002	18.4026	19.2023	17.9846	18.2368
Cplx1	14.7398	14.9878	15.7101	15.5696	15.9637	15.7697	16.1696	15.2836	14.7747	13.3595	15.6307	15.2201	15.6673	16.5049	15.7996	16.1524
Cplx2	16.1549	16.3547	16.8625	16.7728	17.3355	17.2976	17.3348	16.4934	16.0645	15.402	17.1574	16.8676	17.2781	18.8884	17.3578	18.0769
Cpm	16.125	16.1331	16.395	16.1643	16.1706	15.6319	15.3713	15.6514	16.0352	15.9236	16.2555	16.11	16.7559	18.1715	16.6613	16.9229
Cpne1	19.5773	19.4834	19.5001	19.5879	19.5664	19.5151	19.4214	19.4204	19.6483	19.4711	19.4763	19.5046	19.2739	18.9979	19.4989	19.1884
Cpne2	16.5982	16.7498	16.6361	16.7473	16.6814	16.8836	16.8069	16.8522	16.743	16.6531	16.5858	16.7087	16.7259	16.3297	16.6645	16.5758
Cpne3	19.8456	19.863	19.8063	19.9206	19.9253	19.9327	19.6225	19.7733	20.0112	19.7701	19.8263	19.8308	19.6964	19.1887	19.7595	19.6616
Cpne6	12.5869	12.7752	12.921	12.6228	12.7362	13.2185	13.3559	12.4889	13.2943	12.4134	12.8116	12.8804	13.5221	15.0855	13.1449	13.4398
Cpne8	13.273	13.608	13.5787	13.5405	13.4969	12.9273	13.2593	13.1062	13.6927	13.4064	13.7744	13.4714	13.2513	13.801	13.7755	13.841
Cpox	16.4865	16.454	16.2991	16.5222	16.2568	15.9714	16.6436	16.1247	16.2895	16.5015	16.3298	16.4511	16.3065	15.8343	16.46	16.1562
Cpped1	16.308	16.4932	16.6049	16.421	16.5442	16.2237	16.3457	16.1788	16.2481	16.555	16.4984	16.4383	16.3338	16.1752	16.0246	15.9779
Cpq	16.9541	17.1	16.9034	16.8598	16.8785	16.2645	16.1751	16.9443	16.7362	17.0697	16.9169	16.9625	17.1272	16.3847	16.8759	17.0745
Cps1	17.103	17.1571	17.2619	17.2157	16.4731	15.1547	22.1302	15.7732	15.5266	15.658	15.7817	16.074	15.7611	16.1358	15.5068	15.8421
Cpsf1	13.4909	13.5993	13.5911	13.6789	13.5574	13.3323	13.4261	13.261	13.248	13.1511	13.0359	13.1234	13.217	13.1877	13.2071	13.202
Cpsf2	15.225	15.3027	15.3213	15.3457	15.1625	15.5044	17.4533	15.5203	15.3576	15.4151	15.3018	15.3371	15.4121	15.3833	15.1918	15.3401
Cpsf3	14.8602	15.0264	14.9923	15.1322	14.8987	14.7133	14.9088	14.7589	15.2747	15.3803	15.0431	15.1586	15.1739	15.1487	14.8377	15.1462
Cpsf6	18.3738	18.0598	18.1281	18.1009	18.0965	18.2942	17.8829	18.2582	18.19	18.3152	18.1152	18.1766	18.0521	17.7753	18.1542	17.9788
Cpsf7	16.0419	16.1599	16.1185	16.0722	16.1579	16.5569	16.4455	16.2931	16.3206	16.2086	16.1592	16.1999	16.4036	16.0718	16.2724	16.1204
Cpt1a	20.2884	20.3211	20.4029	20.4287	20.4379	20.63	20.8388	20.7253	20.2107	20.2249	20.177	20.2454	20.1129	20.3398	20.3086	20.3309
Cpt2	19.2196	19.2459	19.34	19.3073	19.2977	19.3808	19.5402	19.5558	19.3096	19.3073	19.3005	19.3029	19.0576	18.4238	19.2041	19.0641
Cr1l	19.8283	19.6642	19.6988	19.5958	19.8288	19.8262	19.6885	19.733	19.9666	20.0363	19.6385	19.6828	19.8523	19.219	19.9725	20.0119
Cracr2b	16.2936	16.1618	16.2707	16.1343	16.1822	16.2221	16.4211	15.9266	16.0866	16.2742	16.0931	16.1227	15.5672	15.664	15.9716	15.224
Crat	19.6594	19.6882	19.6847	19.7031	19.6157	19.6265	19.5642	19.4712	19.4468	19.7971	19.6051	19.6184	19.7517	19.8714	19.8964	19.8449
Crbn	13.234	13.2791	13.282	13.313	13.333	13.5099	13.5083	12.9553	13.366	13.1532	13.4049	13.3497	13.4205	13.5855	13.2128	13.6159
Creb1	17.813	17.8578	17.8972	17.8043	17.6748	17.7733	17.7477	17.8177	18.0273	18.0078	17.9897	18.0924	17.3237	17.0086	17.6254	17.2123
Crebbp	13.9439	14.1133	14.0904	14.0986	14.1142	13.88	14.0815	14.2674	13.967	14.0336	14.0809	13.9209	13.9229	13.452	14.1112	13.9294
Creg1	13.8152	14.0529	13.7399	13.9726	13.8569	13.2675	13.743	13.4927	13.924	13.7185	14.1047	13.8863	14.3995	14.3169	13.9571	14.1865
Creld1	17.9441	17.9474	18.0352	18.015	17.9869	18.0915	17.9812	18.016	18.0303	17.9911	18.0185	18.0557	18.2207	18.2105	18.1345	18.2885
Creld2	15.6513	15.9397	16.0108	15.9439	15.9151	16.082	15.9831	15.9915	15.9047	15.7534	15.9722	15.7391	15.8437	15.7162	15.8202	15.7543
Crip1	18.0709	18.5817	18.4507	18.4521	18.4464	17.4999	16.2881	17.3004	17.4409	18.259	17.7085	18.1579	17.97	18.2123	18.0639	18.2059
Crip2	20.7276	20.7688	20.618	20.5919	20.7699	20.9944	20.4256	20.5803	20.6716	20.7974	20.5703	20.5817	20.6063	20.3939	20.6262	20.5714
Cript	15.9589	16.1711	16.2421	16.2745	16.1814	16.243	16.0163	16.0536	16.3853	16.1297	16.1546	16.0899	15.5742	14.6771	15.993	15.6907
Crk	18.5339	18.6081	18.7278	18.5437	18.7331	18.3006	17.9825	18.3732	18.7968	18.5345	18.6403	18.6334	18.1428	18.0787	18.289	18.0885
Crkl	18.8871	18.9561	18.9908	18.8603	18.9548	19.0966	18.5536	18.7016	18.9515	18.8633	18.9329	18.886	18.7496	18.4409	18.8366	18.7387
Crlf3	12.1444	12.1757	12.0865	12.2575	12.2741	12.3073	13.4513	12.3353	12.4274	12.2273	12.5152	12.3417	12.6002	13.3476	12.2641	12.7354
Crmp1	15.128	15.5259	15.8009	15.8331	16.1073	16.8228	16.7879	15.8827	15.2384	14.3444	16.1809	15.7931	16.9826	19.0156	16.7793	17.2891
Crnkl1	14.2164	14.3526	14.1433	14.4429	14.2214	13.3857	12.8913	14.4538	14.3429	14.4614	14.4291	14.237	14.4654	14.066	14.1003	13.9828
Crocc	15.6898	16.2741	16.6888	16.476	16.2984	15.6258	15.6364	16.2871	15.5534	15.7583	15.8151	15.7113	15.9017	15.2153	15.5936	15.7486
Crot	15.6513	15.8214	15.7126	15.7469	15.5856	15.7039	16.5101	15.6355	15.4748	15.6706	15.5239	15.5642	15.7968	16.365	15.8776	16.145
Crtap	14.5349	14.7799	14.6233	14.7029	14.6349	14.0775	13.6319	14.6069	14.785	14.6481	14.6076	14.6023	14.7035	13.7574	14.6955	14.6225
Crtc3	13.9703	13.952	13.7157	13.5432	13.4572	13.6677	13.6065	13.4636	13.5028	13.8003	13.6916	13.3826	14.0021	13.9191	13.7592	14.1683
Cryab	17.5392	17.7846	17.8388	17.7128	17.8274	18.3587	18.3208	17.6089	17.1742	17.4154	18.1365	17.7645	18.0239	20.3316	18.143	17.7552
Crybg3	16.8694	16.7895	16.7723	16.8697	16.7145	16.8291	16.7605	16.9818	16.9396	16.8116	16.749	16.9789	16.4315	15.5807	16.5608	16.1982
Cryl1	16.8108	17.044	16.8994	16.9556	16.8577	16.8583	16.6471	16.6117	16.5977	16.7567	17.1245	16.9302	17.1227	17.2247	17.2843	16.8249
Crym	14.4779	14.9282	14.9255	14.606	14.9938	15.8766	15.8802	14.7991	14.1128	13.8063	14.9615	15.0702	15.0164	17.8415	15.2925	15.2618
Cryz	18.9828	19.0128	18.9767	18.913	18.9842	19.1005	19.5354	18.9442	18.8859	18.9693	18.8485	19.0308	18.8342	18.8893	18.9705	19.0737
Cryzl1	16.8611	16.8174	16.6514	16.6743	16.7483	16.9614	16.7668	16.5202	16.668	16.698	16.6863	16.6421	16.5418	16.6055	16.8413	16.846
Cryzl2	16.3447	16.0636	15.7863	16.2294	15.6713	16.4577	14.7617	15.9818	15.4465	16.6552	16.0247	15.86	17.0221	17.6103	16.5993	16.8205
Cs	21.7207	21.7001	21.7939	21.6089	21.7248	21.7055	21.6786	21.4428	21.6032	21.8494	21.776	21.6921	21.8371	22.5187	21.9169	21.9114
Csad	17.1588	17.2096	17.0207	17.199	17.14	17.1392	17.3037	17.3926	17.2146	17.1663	17.0947	17.1058	17.2087	17.1546	17.009	17.1236
Csde1	17.8251	17.8008	17.7879	17.8259	17.8787	17.8864	18.0291	18.0634	17.7277	17.8265	17.812	17.6008	17.6932	17.3951	17.7945	17.7495
Cse1l	19.0172	19.094	19.0764	19.1911	19.1852	18.9609	19.0864	19.2351	19.2517	19.0033	19.1171	19.1784	19.1214	19.0409	19.0058	19.044
Csk	18.5878	18.7094	18.5906	18.5328	18.4861	18.0179	17.8564	18.1645	18.3207	18.5355	18.4687	18.4029	18.6928	18.4527	18.7424	18.9868
Csnk1a1	17.7908	17.9072	17.7836	17.9044	17.917	17.9629	17.993	17.9477	18.0599	17.9801	17.9506	17.9822	18.0678	17.8766	18.0012	18.2407
Csnk1d	17.2875	17.4779	17.4713	17.7262	17.5605	17.7135	17.7952	17.54	17.5014	17.4568	17.4818	17.4237	17.4692	17.5228	17.5042	17.5156
Csnk1e	13.5145	13.4766	13.496	12.9588	13.4744	13.8411	13.6746	13.1766	13.3819	13.265	13.442	13.3548	13.7458	14.1821	13.3766	13.5459
Csnk1g2	15.077	15.0701	15.0581	15.248	15.1515	15.493	15.3414	15.5239	14.8872	14.9754	14.9527	14.83	15.072	15.4488	15.3756	15.5659
Csnk2a1	19.0144	19.0068	18.976	19.0759	19.1275	19.2964	18.9251	19.3018	19.2048	19.1411	19.0607	19.0694	19.7808	19.8705	19.502	19.7476
Csnk2a2	17.5483	17.7859	17.8122	17.9226	17.9444	17.8549	17.7933	17.9345	17.9093	17.7694	17.7572	17.7996	18.1793	18.1857	17.9701	18.1656
Csnk2b	18.1179	18.1095	18.0382	18.1327	18.1015	18.3565	18.3884	18.3285	18.0241	18.2197	18.1492	18.1687	19.0149	18.8561	18.8651	19.0516
Csrp1	19.9103	20.0768	19.8689	19.7955	19.7736	20.3114	19.783	19.8771	19.3716	19.9386	19.7497	19.6686	20.4183	21.1802	20.4511	20.4323
Csrp2	19.5574	19.6069	19.4551	19.7123	19.5612	20.096	19.9807	19.9652	19.4734	19.6584	19.2578	19.2725	19.4251	19.2011	19.3524	19.4812
Cst3	18.9407	18.6395	18.2089	18.549	18.2921	18.4253	17.0127	18.6622	18.237	18.215	18.2437	18.0225	18.3331	18.6863	18.7311	18.4798
Cstb	17.5659	17.6805	17.5587	17.5455	17.8309	17.445	16.6892	17.2275	17.6504	17.4743	17.5876	17.6501	17.5724	17.3451	17.352	17.1732
Cstf1	15.2723	14.9504	14.8584	15.1005	14.9506	15.0355	14.5371	14.8792	15.0613	15.1497	14.99	15.132	14.7401	14.6411	15.145	15.0535
Cstf2	15.5502	15.3543	15.3484	15.1754	15.436	15.5605	15.3335	15.1177	15.4943	15.3874	15.3942	15.3514	15.338	15.033	15.2714	15.2167
Cstf2t	12.4381	12.3894	12.2871	12.0838	12.3419	12.3648	12.5269	12.5409	12.5108	12.4251	12.5239	12.3248	12.557	12.6598	12.3721	12.5174
Cstf3	15.7931	15.6633	15.6553	15.6165	15.5446	15.7776	15.8572	15.6121	15.7139	15.8369	15.6477	15.7675	15.5834	15.5704	15.5853	15.3225
Ctbp1	17.1192	17.1597	17.2298	17.0163	17.2764	17.3842	16.8172	16.9812	17.2477	16.9142	17.3418	17.2659	17.2927	17.6367	17.2575	17.0522
Ctbp2	18.444	18.5495	18.4798	18.2616	18.4936	18.7166	18.4833	18.5268	18.204	18.1923	18.1107	18.2466	18.3365	17.8828	18.3887	18.1644
Ctbs	16.8942	17.0738	16.7797	16.7644	16.8741	16.8495	16.4314	16.5823	16.6708	16.8806	16.9071	17.0145	17.3294	16.8613	16.8861	17.0961
Ctc1	15.1831	15.2876	15.2297	15.3426	15.2328	15.0325	15.2239	15.3344	15.366	15.1393	15.258	15.1985	14.6427	14.565	15.0706	14.9745
Ctcf	18.2992	18.2733	18.2487	18.3652	18.2091	18.1783	17.9344	18.1586	18.3266	18.4459	18.1931	18.3645	17.9346	17.5511	18.1189	17.8845
Ctdp1	12.2716	12.1497	12.0692	12.0322	12.1582	12.3677	12.3693	12.2464	12.3926	12.2373	12.3071	12.1517	11.9816	12.7065	11.9832	12.4426
Ctdsp1	15.3327	15.451	15.4711	15.3169	15.4151	15.6559	15.1274	15.4351	15.4436	15.6759	15.3059	15.4976	15.549	15.3029	15.4412	15.2225
Ctdspl	14.4346	14.5508	14.3568	14.294	14.2002	13.7722	14.3147	14.14	14.0281	14.3786	14.1907	13.9908	14.5311	14.6472	14.5085	14.9877
Cthrc1	14.2609	14.2683	14.0419	14.2363	14.1996	13.7876	13.6913	13.3852	14.534	14.3539	14.4612	14.0317	14.252	13.0981	14.2537	13.7965
Ctif	12.5695	12.6111	12.6238	12.4764	12.7238	12.7723	12.6799	12.6149	12.7599	12.6667	12.6942	12.5316	12.7165	12.8365	12.4313	12.3948
Ctla2a	13.8659	13.7035	14.0859	13.9033	14.0134	13.6456	13.4578	13.8328	14.9867	13.8468	14.6308	14.025	13.7268	12.9271	13.8416	14.0858
Ctla2b	12.6804	12.5825	12.6794	12.5924	12.6933	12.3648	12.5216	12.4589	13.3069	12.6356	12.969	12.7298	12.5311	12.65	12.0585	12.3502
Ctnna1	21.8721	21.7635	21.7996	21.7301	21.9373	21.7132	21.6944	21.712	21.9517	21.9844	21.8015	21.8693	21.2978	20.5445	21.5008	21.2175
Ctnna3	15.0971	15.2088	15.0276	15.1533	14.9711	14.5431	14.3288	14.7658	14.4359	15.0656	14.961	14.7529	15.6395	15.8993	15.2365	15.5729
Ctnnb1	21.5256	21.3744	21.4552	21.3902	21.5377	21.6389	21.4693	21.485	21.6044	21.5268	21.4335	21.5202	21.3223	20.7921	21.2785	21.0384
Ctnnbip1	12.2293	12.2562	12.1294	11.8571	12.157	12.4911	12.6181	12.3669	12.3702	12.2761	12.4425	12.2412	12.0473	13.1089	11.9277	13.5094
Ctnnbl1	17.7171	17.9191	17.8862	17.9508	17.7944	17.5824	17.5575	17.797	17.9896	17.7296	17.877	17.8018	17.6257	17.2386	17.699	17.5615
Ctnnd1	20.7784	20.6642	20.7861	20.6201	20.7711	20.621	20.5501	20.5711	20.9106	20.8509	20.7338	20.8128	20.3789	19.4325	20.3434	20.2033
Ctps1	16.3752	16.2693	16.367	16.5754	16.4031	16.2702	16.3582	16.3601	16.6919	16.4034	16.6274	16.3991	16.4453	16.7594	16.4059	16.7333
Ctps2	17.2763	17.4677	17.4493	17.3978	17.4171	17.2392	17.2004	17.4116	17.413	17.1428	17.453	17.4977	17.4994	17.4152	17.4501	17.6391
Ctr9	16.6834	16.667	16.6546	16.7727	16.6138	16.6764	16.4646	16.6244	16.6507	16.5364	16.4855	16.7534	16.6801	16.8604	16.4471	16.5337
Ctsa	18.0225	18.0374	17.8615	18.0544	17.8782	17.8551	18.0851	18.0677	18.0039	18.1999	18.0331	18.0063	17.956	17.0651	17.7651	17.6625
Ctsb	19.1748	19.2998	19.0156	19.021	19.0062	18.7847	18.7962	18.7924	19.3282	19.2375	19.3961	19.1517	19.3712	18.6651	18.9936	19.0957
Ctsc	17.1483	16.9004	16.9226	16.8236	16.9286	17.0191	16.8971	16.7254	16.9768	16.9476	17.0134	17.0104	17.2181	16.1572	17.0969	17.138
Ctsd	21.4449	21.3921	20.879	21.0139	21.0024	20.9988	21.119	21.2646	21.0143	21.2893	21.1838	20.9844	21.2612	20.9996	21.1305	21.0996
Ctsf	14.8925	14.5947	14.5545	15.0425	14.6636	14.6404	14.6845	14.7895	14.6086	14.7582	14.6495	14.8909	15.9364	16.0571	15.2017	15.4779
Ctsh	14.6614	14.6783	14.4527	14.5259	14.4717	14.1871	13.456	14.7657	14.6796	14.4407	14.345	14.6862	14.6368	14.6353	14.4924	14.5648
Ctsl	16.8299	16.8993	16.5144	16.5412	16.7404	15.564	16.0718	16.389	16.6675	16.7919	17.0954	16.7741	17.0943	16.1985	16.6728	16.4324
Ctss	17.6166	17.5878	16.9502	17.3496	16.9833	15.5297	16.3148	16.5033	17.0556	16.9513	17.3549	16.9336	17.1811	16.4863	17.1671	16.8239
Ctsz	17.0596	17.1505	16.8323	16.8623	16.8296	16.7941	16.7322	16.7646	17.2622	16.9634	17.0117	17.0121	16.7863	16.3842	16.8765	16.6497
Cttn	21.0414	21.1637	21.0956	21.0611	21.1259	21.1318	21.1184	21.1807	21.1146	21.2453	21.015	21.0087	20.9918	20.7406	21.1121	21.2346
Cttnbp2nl	15.8838	15.5371	15.4586	15.4041	15.5376	16.0204	14.7852	15.4922	15.5147	15.7059	15.4389	15.7115	15.8103	15.4969	15.5673	15.1965
Cul1	17.2733	17.4807	17.5573	17.5877	17.5363	17.4991	17.717	17.6145	17.4357	17.3847	17.5001	17.3645	17.3498	17.647	17.4388	17.5867
Cul2	16.3165	16.4845	16.4959	16.5018	16.4801	16.4719	16.4568	16.5206	16.414	16.349	16.3938	16.3915	16.4907	16.87	16.3326	16.4853
Cul3	18.7288	18.7286	18.8361	18.8585	18.8049	18.7297	18.5102	18.7914	18.8672	18.697	18.7916	18.7737	18.807	19.1592	18.7673	19.0131
Cul4a	17.242	17.255	17.0222	17.3393	17.1466	17.5634	17.4227	17.5808	17.1048	17.2109	17.1157	16.9619	17.1202	17.3731	17.3282	17.4487
Cul4b	18.1319	18.4329	18.2676	18.3759	18.3152	18.6175	18.9896	18.8096	18.269	18.1901	18.2161	18.2901	18.187	18.4576	18.2367	18.2718
Cul5	18.012	18.1024	18.129	18.2064	18.1251	18.041	17.7238	18.0835	18.1676	17.9638	18.1318	18.1414	18.1403	18.5452	18.1866	18.1625
Cuta	14.6854	15.0251	15.364	15.0366	14.9258	14.2749	14.6792	14.6433	15.1556	14.767	15.2044	15.2788	14.566	14.7165	14.4295	13.9937
Cutc	17.7482	17.7401	17.5956	17.7803	17.8839	17.5972	17.7077	17.5468	17.9903	17.6741	17.7378	17.8869	17.5094	17.03	17.4141	17.2514
Cux1	15.3757	15.2398	15.0591	15.2142	15.1168	15.3665	15.1948	15.2455	15.0749	15.3376	15.3021	15.201	15.1437	15.8541	15.1605	15.0007
Cwc15	14.1722	14.1459	13.9728	13.8234	13.9782	13.8529	13.5513	13.8817	14.0785	14.1729	14.1177	14.0562	13.8548	13.3698	14.3152	13.8522
Cwc22	13.2015	12.8371	12.7551	12.5376	12.8311	13.3369	13.2163	12.9567	12.963	13.1581	13.1324	12.831	12.956	12.6563	12.7474	12.576
Cwc27	13.1098	13.2005	13.3134	13.2194	13.2388	12.5014	12.7385	12.9479	13.5012	13.2283	13.4339	13.426	12.5633	12.7867	12.4329	12.4514
Cwf19l1	17.5022	17.4448	17.3893	17.3664	17.258	17.2968	17.3714	17.4868	17.5248	17.4059	17.4577	17.417	17.1521	17.0251	17.2105	16.9856
Cxcl12	16.6607	16.8514	16.8444	16.439	16.5896	16.0102	16.1723	16.5874	16.5382	16.5549	16.6462	16.3627	16.2682	15.0029	16.0176	15.7608
Cxxc1	12.477	12.3687	12.22	12.5166	12.3443	13.578	12.5903	12.8413	12.7021	12.5318	12.6062	12.7078	12.9182	14.7243	12.6624	13.1317
Cyb5a	18.9623	18.9996	18.9593	18.9345	18.9969	18.936	19.5087	18.961	19.0863	18.9783	18.8569	19.0111	18.719	17.9914	18.8808	18.7791
Cyb5b	19.3379	19.1128	19.0281	19.1105	19.2462	19.6986	19.5444	19.2773	18.8686	19.2419	18.9981	19.0527	19.1868	19.1317	19.3345	19.2309
Cyb5r1	19.4294	19.3619	19.3671	19.3403	19.3989	19.5684	19.2896	19.4111	19.2652	19.3059	19.3446	19.3525	19.4493	19.4404	19.511	19.4887
Cyb5r3	22.0864	22.078	22.0306	22.1265	22.0783	21.999	22.001	22.122	21.9293	22.1325	21.9736	21.964	22.1958	21.8786	22.3096	22.3242
Cybb	11.8399	11.8204	11.7852	11.7665	12.1316	12.554	12.9076	12.5517	12.0785	11.8701	12.0694	11.8647	12.0364	12.9067	11.8756	12.0921
Cybc1	17.1563	17.2206	16.9009	17.1975	16.9334	17.1573	17.1453	17.3466	17.1804	17.0426	17.0319	17.0046	17.2019	16.7751	17.3723	17.4165
Cyc1	19.0887	19.0611	19.1175	19.0569	19.0579	18.9416	19.3624	19.3005	18.9446	19.0244	18.8899	18.9309	19.3823	19.9665	19.2938	19.5571
Cycs	19.987	20.2526	20.3681	20.2144	20.3077	19.9597	20.303	20.2954	20.3061	20.1221	20.3148	20.3651	20.2997	20.7544	20.2509	20.3733
Cyfip1	20.6002	20.7365	20.6634	20.7477	20.6948	20.7696	20.6118	20.8456	20.8357	20.6483	20.7104	20.6436	20.7225	20.6799	20.7727	20.8224
Cygb	14.2164	14.7012	14.9198	14.776	14.6223	14.8676	14.8319	14.3079	14.3064	14.1041	14.6106	14.6649	15.5313	15.9139	14.9317	15.405
Cyp20a1	17.6872	17.7854	17.8771	17.9098	17.8138	17.7195	17.6062	17.7247	17.851	17.8219	17.8411	18.0526	17.9661	17.3602	17.9374	17.8118
Cyp2c29	13.7574	14.1004	14.6324	14.4853	13.8915	12.875	15.5525	12.237	12.989	12.9667	13.1419	13.2234	12.4955	13.2826	13.1085	12.7703
Cyp2d11	17.0709	16.8359	17.1243	17.0188	16.9981	17.0551	18.7846	16.7419	17.0399	16.8007	16.9936	16.8423	16.1435	15.0006	16.8604	16.5871
Cyp2d26	16.8476	16.5053	16.6325	16.7114	16.8568	16.8145	17.1329	16.7654	16.9512	16.9221	16.8421	16.6863	16.1556	15.1061	16.7525	16.2431
Cyp2e1	16.5529	16.4951	17.0421	16.9587	16.1358	15.4965	19.4674	15.0934	15.7932	15.6866	16.2017	15.9268	15.7375	15.0941	15.5628	15.3261
Cyp46a1	12.2958	12.4351	12.4638	12.5328	12.5304	12.4491	12.6141	12.6939	12.8027	12.4433	12.6555	12.6496	13.3268	14.1389	12.9205	13.2018
Cyth1	12.5127	12.5384	12.4528	12.5703	12.4775	12.3082	12.6695	13.0811	12.7291	12.6871	12.6485	12.601	12.2672	13.0158	12.5509	12.3798
Cyth3	15.3736	15.4735	15.5283	15.588	15.5959	15.9073	15.6832	15.3276	15.2248	15.4138	15.4078	15.3889	15.5583	16.1316	15.3259	15.4153
Czib	16.2564	15.766	15.7095	15.8486	15.9285	16.1818	15.6691	15.7656	15.9834	15.8566	16.035	15.9497	16.0726	15.8748	15.8637	15.9144
D17h6s53e	15.5977	15.6224	15.7084	15.5385	15.5895	15.4598	15.3318	15.5984	15.5379	15.6325	15.646	15.6326	15.1545	15.2267	15.3757	15.3176
D2hgdh	17.5902	17.5111	17.3111	17.385	17.3118	17.3403	17.68	17.3677	17.3592	17.7374	17.3651	17.4293	17.7165	17.7535	17.743	17.6242
D6Wsu163e	13.471	13.2211	13.2967	12.9897	13.1252	13.0917	13.0622	13.4025	13.2945	13.3812	13.6342	13.088	13.117	13.1317	13.1197	13.7138
D8Ertd738e	18.1238	18.1542	18.1137	18.0409	18.1578	17.8607	17.8897	17.8691	18.2068	18.2319	18.2712	18.1511	17.5266	17.1129	17.9289	17.6955
Daam1	14.5597	14.4622	14.4829	14.5022	14.471	14.0662	14.4232	14.1991	14.5002	14.5767	14.4978	14.4931	14.4827	14.2338	14.8106	15.1345
Daam2	18.5261	18.7512	18.6085	18.621	18.5333	18.0525	18.0012	18.1365	18.0655	18.4429	18.3752	18.2734	18.7946	19.1407	18.7544	18.7591
Dab2	17.9367	17.8766	17.7753	17.6177	17.9279	17.2592	17.0852	17.778	18.1591	17.8446	18.1194	18.0426	17.5165	16.7153	17.6277	17.2384
Dab2ip	18.3912	18.4922	18.4718	18.4698	18.5193	18.3608	18.2616	18.3433	18.5839	18.4892	18.3917	18.4267	18.3193	17.8467	18.2484	18.3106
Dad1	15.1032	14.9068	15.1897	15.3389	15.0845	12.9842	14.8133	14.8376	15.3308	14.8459	15.2624	15.3994	14.7498	13.7845	14.5137	14.5686
Dag1	18.6312	18.689	18.5362	18.5922	18.5688	18.1626	18.1459	18.2576	18.4333	18.6323	18.6004	18.4154	18.9077	18.5415	18.9265	19.0332
Dap	16.4921	16.5662	16.5938	16.4351	16.6094	16.6104	18.9689	16.4686	16.8724	16.5448	16.6327	16.5221	15.8563	16.9737	16.6822	16.3766
Dap3	16.116	16.1625	16.123	16.2435	16.1344	16.0675	16.3181	16.3151	16.1142	16.1066	16.1678	16.1	16.3042	16.4134	16.2087	16.4561
Dapk3	16.7852	16.9647	16.9797	17.0447	16.8765	16.9752	16.8103	16.7885	16.8682	16.9036	16.8608	16.8807	16.8855	16.769	16.853	16.8685
Dars1	18.6601	18.6283	18.7185	18.737	18.5129	18.7681	18.9787	18.9342	18.6266	18.602	18.6221	18.6113	18.7859	18.437	18.6329	18.8378
Dars2	14.1928	14.311	14.122	14.2438	14.1346	14.3531	14.2501	14.2862	14.4095	14.2345	14.0397	14.3402	14.4465	14.7269	14.216	14.1453
Dazap1	18.0493	18.024	17.8821	18.0945	17.9478	17.8699	17.8935	18.0453	18.1792	18.0709	17.898	17.9747	17.7239	17.1415	18.0242	17.5246
Dbi	19.0453	19.1422	19.4422	19.076	19.4884	19.1593	19.8521	19.0631	19.3241	18.8699	19.605	19.3361	20.4662	20.791	19.3892	19.4468
Dbn1	14.9994	14.9162	14.606	14.7536	14.7451	15.3432	15.3511	14.9628	14.6784	14.5183	14.9126	14.8167	15.6233	15.9919	15.46	15.398
Dbnl	18.4577	18.3882	18.2955	18.4157	18.3445	18.6982	18.2016	18.3956	18.2508	18.3775	18.2489	18.5741	18.9344	18.9696	18.5726	18.5564
Dbr1	14.8292	14.8186	14.6797	14.7889	14.7624	14.8856	14.8637	14.7939	14.8528	14.8689	14.7814	14.7845	14.8109	15.0585	14.6754	14.3233
Dbt	17.8084	17.8935	17.6926	17.6991	17.6014	17.7655	18.4099	17.9117	17.33	17.8686	17.6201	17.6559	17.9843	18.0331	18.0218	18.0522
Dcaf1	12.543	12.7765	12.4907	12.4642	12.6572	12.8849	12.7923	12.7692	12.7154	12.7215	12.7348	12.7488	12.5824	13.1131	12.6955	12.8203
Dcaf5	12.1464	12.2468	12.0429	12.127	12.0584	12.4312	12.4953	12.4953	12.475	12.1793	12.4348	12.2564	12.2452	12.6891	12.0537	12.2125
Dcaf7	16.2486	16.2448	16.1519	16.2943	16.2358	16.7875	16.6093	16.5278	16.1105	16.3328	16.1566	16.3433	16.3924	16.6379	16.4906	16.29
Dcaf8	15.469	15.3264	15.469	15.4181	15.4072	15.3214	15.6825	15.603	15.5269	15.5223	15.439	15.393	15.256	15.1801	15.2863	15.4377
Dcakd	15.1904	15.0433	15.2261	15.1511	15.0071	14.5294	15.1251	15.1932	15.0237	15.4447	15.2457	14.9553	13.983	14.3017	15.2345	15.2767
Dclk1	13.0039	13.5943	13.4064	12.935	13.2894	13.9005	14.3161	13.9064	13.2474	13.07	13.4484	13.5394	14.5637	15.4791	13.8367	14.5875
Dcn	16.9329	16.7036	16.9492	16.8719	16.7703	16.9166	17.0674	16.8747	16.505	16.6425	16.9198	16.9716	18.849	18.4248	18.004	18.9503
Dcp1a	13.3994	13.1937	13.3482	13.1935	13.7173	12.6158	12.7101	13.8556	13.1227	13.3749	13.4326	13.5115	12.7004	13.4153	13.6331	12.778
Dcp1b	12.7614	12.8878	12.7877	12.77	12.909	12.4536	12.5665	13.0745	12.9675	12.6046	12.6576	12.7025	12.1614	12.9028	12.2422	12.4505
Dcps	19.1531	19.1286	19.1822	19.1711	19.2151	18.9891	18.7547	18.887	19.2591	19.2105	19.192	19.2255	18.7315	18.1513	18.8744	18.6134
Dctn1	20.4157	20.4703	20.486	20.5233	20.5828	20.7085	20.5066	20.6034	20.3513	20.3969	20.4223	20.3215	20.3589	20.8588	20.4652	20.5285
Dctn2	19.6587	19.6093	19.7042	19.4595	19.69	19.7643	19.5435	19.4132	19.6583	19.5023	19.7035	19.645	19.5505	19.866	19.5582	19.5945
Dctn3	16.4024	16.6447	17.22	16.7054	16.8864	16.2949	16.5468	16.4921	16.827	16.3956	16.8409	16.678	16.9736	16.6349	16.0505	16.4407
Dctn4	17.4773	17.3661	17.3217	17.3551	17.3689	17.6817	17.4891	17.4441	17.2554	17.4541	17.402	17.3577	17.6039	18.2116	17.6145	17.7663
Dctn5	16.5892	16.6659	16.6875	16.6721	16.6704	16.9808	16.7782	16.7105	16.5707	16.6302	16.6536	16.6332	16.8905	17.0761	16.7627	16.7788
Dctn6	16.9447	16.8822	16.8694	16.8658	16.8956	17.0578	17.03	16.8638	16.7151	16.743	16.6999	16.7918	16.9808	17.506	17.0385	17.0606
Dcun1d1	14.7474	14.917	14.8622	14.9994	14.9206	14.8842	16.2293	14.961	14.8882	14.7685	14.8368	14.5414	15.2	15.1778	14.8468	15.3373
Dcun1d3	16.1586	16.0414	16.365	16.2338	16.2799	15.798	15.9929	16.1369	16.8419	16.0414	16.2668	16.6003	15.794	14.8581	15.7104	15.5609
Dda1	14.192	14.3385	14.2883	14.2006	14.1501	14.1788	14.4193	14.0472	14.3137	14.2168	14.2494	14.2239	14.1609	14.1873	13.7844	14.1742
Ddah1	20.4551	20.3533	20.2579	20.219	20.5475	20.0365	20.2053	19.8209	20.5305	20.2665	20.3107	20.3396	19.7292	19.9911	20.0304	19.6866
Ddah2	18.8723	18.9318	18.7862	18.6979	18.9523	19.4093	19.0963	18.6995	18.4692	18.8023	18.6697	18.7814	19.0143	19.5231	18.8337	19.1403
Ddb1	19.9759	20.0596	19.9448	20.0306	19.9593	19.9558	20.0792	20.099	19.954	19.9563	19.9865	19.9173	19.9285	20.0215	19.8804	19.792
Ddc	19.6639	19.7376	19.7558	19.7944	19.9064	19.6936	19.5319	19.4858	19.7447	19.5736	19.7156	19.9446	18.417	17.8304	18.9236	18.085
Ddhd2	12.58	12.3624	12.4998	12.4124	12.3951	12.8259	12.5754	12.3246	12.4714	12.2657	12.7446	12.454	12.7095	13.2921	12.6966	12.7952
Ddi2	17.2514	17.0416	17.0295	16.8278	17.0366	16.9215	17.1513	17.0262	17.1416	17.0689	16.8015	17.0291	16.8708	16.9122	16.7926	16.9681
Ddost	19.6593	19.5291	19.5858	19.6916	19.5862	19.6313	19.6329	19.7695	19.7251	19.5705	19.5956	19.5811	19.9638	19.8807	19.8527	19.979
Ddrgk1	14.8953	14.8505	14.7096	14.6894	14.9108	14.8783	15.074	14.8125	14.8973	14.8852	14.9778	14.8549	14.3292	14.2933	14.7469	14.6047
Ddt	18.8998	19.0422	19.299	19.3111	19.3784	19.2838	20.1579	19.0618	19.155	18.7278	19.2893	19.2858	18.8292	19.3581	19.0508	18.9552
Ddx1	20.0706	20.0254	19.9107	20.0091	20.0879	20.0124	19.9719	20.1876	20	20.0412	20.0315	19.9286	20.1319	19.9736	20.1112	19.8987
Ddx17	19.2479	19.2474	19.2389	19.245	19.3041	19.2805	19.1836	19.4393	19.4489	19.3087	19.3358	19.2811	18.9896	18.3568	19.1761	18.8634
Ddx18	16.6788	16.7344	16.6187	16.7575	16.6222	16.5306	16.5991	16.5404	16.7951	16.7177	16.7633	16.5848	16.5894	16.3409	16.4972	16.4567
Ddx19a	19.1056	19.1199	19.174	19.2079	19.2085	19.1307	19.1479	19.1627	19.2392	19.0281	19.0739	19.1148	18.8539	18.803	18.9623	18.7932
Ddx21	19.4187	19.4341	19.4496	19.4856	19.3316	19.1333	19.2602	19.382	19.4457	19.5565	19.7198	19.3973	19.0633	18.8684	19.1935	18.9388
Ddx24	13.9572	13.822	13.622	13.64	13.6534	13.8061	13.6892	14.068	13.7577	13.8935	13.7474	13.646	13.8358	13.9611	13.6818	13.5299
Ddx39a	13.5128	13.1962	13.271	13.402	13.3005	13.2676	12.9275	13.608	13.8395	13.3322	13.6798	13.3751	13.3707	12.8632	13.1141	13.1566
Ddx39b	19.8356	19.8638	19.6913	19.7618	19.7598	19.6855	19.5988	19.9063	19.8896	19.8057	19.6865	19.7584	20.1534	20.0668	19.8677	20.023
Ddx3x	20.7193	20.6598	20.6567	20.6499	20.6695	20.483	20.1942	20.7688	20.6999	20.686	20.6614	20.6787	20.4988	20.083	20.4605	20.2835
Ddx41	12.7154	13.1662	12.8779	13.1358	12.8749	12.5873	12.7399	12.7452	13.3339	13.0584	12.9152	13.2576	13.3317	13.1524	12.9772	12.7099
Ddx42	17.6133	17.4851	17.5233	17.6587	17.5488	17.6936	17.6179	17.6167	17.4353	17.5426	17.5973	17.5562	17.1269	17.3364	17.4213	17.556
Ddx46	18.638	18.5882	18.619	18.686	18.5843	18.4065	18.4396	18.5732	18.6904	18.6615	18.705	18.6314	17.7676	17.2134	18.309	18.1501
Ddx47	15.6224	15.6451	15.5996	15.7043	15.6035	15.6235	15.4371	15.7344	15.7895	15.6917	15.7141	15.646	15.4879	14.9535	15.6725	15.311
Ddx5	21.298	21.3177	21.3037	21.3699	21.3232	21.3804	21.1084	21.3247	21.3504	21.313	21.3585	21.3787	21.084	21.3905	21.1748	21.0858
Ddx50	15.6933	15.56	15.6228	15.6197	15.5241	15.6036	15.7504	15.7395	15.6255	15.7091	15.6408	15.5792	15.1001	14.8881	15.3759	15.4572
Ddx52	12.5192	12.4015	12.3731	12.6894	12.4121	12.7881	12.8931	12.5582	12.6803	12.5204	12.8294	12.5007	12.6184	12.7672	12.4805	12.4424
Ddx55	14.7719	14.6295	14.6866	14.6981	14.7459	14.9357	15.164	14.8461	14.6537	14.5808	14.5782	14.6085	15.2919	16.1342	14.94	15.0896
Ddx58	19.9655	19.9263	19.9317	20.0033	20.0017	20.0052	19.7505	19.951	20.1696	19.8884	19.8551	19.9943	19.5656	19.1285	19.6293	19.4132
Ddx6	19.2358	19.2471	19.1753	19.2361	19.276	19.0533	19.0146	19.2636	19.2732	19.256	19.2063	19.1343	19.7095	19.5421	19.4475	19.4866
Decr1	20.5914	20.5707	20.5629	20.5444	20.5322	20.4547	20.9562	20.4272	20.4127	20.701	20.4603	20.4775	20.4498	20.207	20.6746	20.6829
Def6	16.1198	16.0026	16.0464	15.9302	16.1049	16.1763	16.1843	16.2278	15.8819	15.9908	15.9585	15.9091	15.9573	15.3478	16.0109	15.8294
Degs1	15.799	15.6051	15.7046	15.8154	15.6574	15.8881	15.9584	16.0179	15.664	15.7896	15.665	15.5773	15.8843	16.0957	16.0429	16.197
Degs2	13.9656	14.0918	14.1856	13.7873	14.0317	14.0239	14.219	14.154	14.2034	13.8119	14.2067	14.0304	13.9745	14.2965	13.8396	13.7668
Dek	19.3297	19.445	19.3932	19.4446	19.5454	19.4218	19.1687	19.4381	19.6221	19.4569	19.4804	19.4221	19.1419	18.7389	19.2505	19.1366
Dennd10	15.7827	15.765	15.7396	15.8852	15.702	15.4909	15.8492	15.718	15.6972	15.6433	15.6725	15.6262	15.9114	15.94	15.6885	15.6169
Dennd11	14.0331	13.8083	13.9276	13.8796	14.0462	13.7642	13.569	13.7782	14.0529	13.6243	14.058	13.9181	13.7135	14.4303	13.9392	14.0408
Dennd2b	12.8732	13.1146	13.0561	13.0183	12.7897	13.0505	13.0504	13.2598	12.8166	13.0736	13.0737	12.8189	13.1102	13.9189	13.1633	13.3961
Dennd3	17.0056	17.0719	17.1625	17.3143	17.3053	17.2226	17.1106	17.1759	17.1252	16.9892	17.0228	17.1073	16.3598	16.3087	16.6688	16.5717
Dennd4c	17.9992	17.7133	17.8751	17.8036	17.919	17.8744	17.4696	17.7495	17.9818	17.9479	17.8417	17.9318	17.6358	17.2841	17.7828	17.478
Dennd5a	16.4378	16.4378	16.514	16.6852	16.5329	15.8479	15.9824	16.3344	16.4929	16.4864	16.5043	16.5155	16.3407	16.5676	16.2299	16.107
Dennd5b	13.7019	13.8233	13.7834	13.8696	13.775	13.9502	13.934	13.9781	13.9914	13.7613	13.7617	13.9788	14.1355	14.5342	13.8426	13.5591
Dennd6a	15.0525	15.0319	15.3081	15.3023	15.3257	15.1404	15.2184	15.16	15.141	14.837	15.2011	14.9894	14.5	14.5456	14.7813	14.6941
Denr	16.7361	16.6457	16.6777	16.7514	16.8495	16.711	17.0399	16.505	16.7055	16.7193	16.8115	16.5693	16.8595	16.8077	16.7945	16.7165
Dera	12.3785	12.1812	12.1	12.2704	12.1309	12.4007	12.5868	12.2262	12.3875	12.2678	12.4638	12.1542	12.3761	12.7402	12.2489	12.1514
Derl2	11.7931	11.9633	11.9611	11.8633	11.8065	13.1035	12.3905	12.261	12.2013	11.9921	12.1553	11.8159	12.7611	13.1586	11.8252	12.351
Derpc	11.9764	12.0118	11.9482	11.786	12.0724	12.3828	12.373	12.186	12.2121	12.0281	12.3123	11.9814	12.0097	12.7646	12.1384	12.0481
Des	21.3906	21.4366	21.2534	20.9861	21.0391	20.9743	20.7143	20.9536	20.8288	21.332	20.9196	20.7942	21.532	21.2979	21.4774	21.5217
Dffa	14.5779	14.2657	14.1144	14.3923	14.1122	14.9713	14.3869	13.8795	14.4136	14.1117	14.2622	14.6778	15.0559	14.5032	14.3208	14.4905
Dgat1	12.7533	12.7238	12.8361	12.8595	12.877	13.1279	13.1789	13.0461	12.8499	12.8988	12.8141	12.9578	12.691	13.2556	12.7957	12.5464
Dgke	14.5136	14.7203	14.8614	14.8278	15.0135	14.4008	14.6248	14.5799	14.9482	14.7766	14.9473	14.9352	14.8103	14.9465	14.6648	14.9906
Dgkz	13.93	13.7712	13.7113	13.7458	13.8286	14.0227	13.831	13.8197	13.9942	13.722	13.9091	14.0175	13.9605	14.7483	13.8329	13.9612
Dguok	17.3369	17.3342	17.2529	17.1929	17.2037	17.1308	16.7841	17.1859	17.277	17.2523	17.1236	17.3391	17.4525	16.9057	17.2663	17.3197
Dhdh	15.9931	15.8369	15.8595	15.9595	15.8352	15.6356	16.2911	15.5242	15.9938	16.4145	15.8291	15.8553	15.6336	15.4232	15.7794	15.7542
Dhfr	14.4691	14.1592	14.2827	14.4357	14.2572	14.3871	15.6429	14.459	14.4434	14.3773	14.4958	14.3572	13.9096	14.1084	14.4617	14.4359
Dhodh	16.054	15.9698	15.9374	15.9511	16.0396	16.2059	15.9761	15.9437	15.8154	16.0431	15.9702	16.0692	16.4835	16.3726	16.1557	16.4037
Dhrs1	16.6362	16.4934	16.5247	16.5581	16.5511	16.8527	17.6611	16.7323	16.3595	16.7589	16.3731	16.4014	16.7559	17.3619	16.7265	16.7172
Dhrs4	18.74	18.6422	18.5707	18.6909	18.5913	18.6003	19.5398	18.7482	18.4766	18.8606	18.6564	18.619	19.0834	18.8828	18.778	18.9227
Dhrs7	19.1492	18.9982	19.096	19.0397	19.1156	18.795	18.9651	18.7995	19.1079	19.1146	19.1241	19.058	18.7203	18.3256	18.9808	18.7845
Dhrs7b	12.5545	12.71	12.7392	12.6143	12.4218	12.6257	12.7431	12.4935	12.7105	12.6196	12.8496	12.6998	12.6124	12.8184	12.7782	12.9962
Dhx15	19.5484	19.4302	19.4619	19.5456	19.5223	19.4536	19.4034	19.6726	19.4997	19.5653	19.5361	19.4369	19.5513	19.3248	19.4965	19.3723
Dhx29	16.5027	16.4088	16.5238	16.4939	16.4626	16.1959	16.1406	16.4467	16.5398	16.5012	16.6978	16.5208	16.2459	15.4169	16.4802	16.1945
Dhx30	15.7454	15.6518	15.7669	15.8175	15.757	15.7425	16.0106	15.9577	15.7643	15.6325	15.7207	15.6669	15.5083	15.7131	15.4754	15.7307
Dhx36	15.5587	15.5624	15.4587	15.366	15.4248	15.4288	16.4217	15.6458	15.449	15.4818	15.5047	15.4051	15.3677	15.6288	15.4172	15.6145
Dhx40	14.4812	14.5475	14.3364	14.4613	14.6112	14.5411	14.6583	14.3564	14.7061	14.451	14.6204	14.5913	14.5445	14.4751	14.4404	14.5446
Dhx57	14.8546	14.795	14.463	14.6586	14.6327	15.2408	14.9856	14.8473	14.4427	14.5292	14.4746	14.4236	15.1238	15.9536	14.7121	15.0238
Dhx9	20.6325	20.748	20.6939	20.8238	20.6963	20.5189	20.5502	20.7532	20.7557	20.7581	20.7206	20.6806	20.5173	20.015	20.651	20.6039
Diablo	15.891	15.8526	16.3949	16.0555	16.118	15.3824	15.496	15.6819	16.274	15.9862	16.365	16.4216	15.7378	15.1061	16.0302	15.6884
Diaph1	18.7988	18.9255	18.9502	18.9925	18.9526	18.8524	18.8084	18.9817	18.8786	18.9823	18.8954	18.8417	18.99	18.5622	19.0043	19.2955
Diaph2	16.187	16.4539	16.2982	16.3971	16.293	15.9984	16.1925	16.3676	16.3904	16.2411	16.3395	16.354	16.622	16.5435	16.3668	16.2859
Dicer1	13.2192	12.9712	13.0809	13.3154	13.1181	13.2041	12.6239	13.1981	13.3737	13.1792	13.3662	13.2604	13.3065	13.3723	13.0034	13.0659
Dido1	14.3558	14.4373	14.6163	14.4531	14.5655	13.965	14.3062	14.4272	14.7184	14.4472	14.6724	14.5946	13.9863	14.1209	14.175	13.8433
Dip2a	14.9683	15.2207	15.2383	15.3095	15.1538	15.2487	15.2879	15.3333	15.0989	15.06	15.0859	15.3422	15.3797	16.1498	15.0792	15.3736
Dip2b	17.8472	17.951	18.0822	18.0577	18.1295	18.2814	17.7315	17.9193	18.1188	17.8852	18.0631	18.1102	18.116	18.6026	18.0276	18.1539
Dipk1a	12.5967	12.5377	12.3476	12.5106	12.5464	12.3096	12.706	12.8537	12.6215	12.4922	12.6991	12.7326	12.5969	12.6992	12.5752	12.4061
Diras1	12.1108	12.0981	12.1522	12.2962	12.1462	12.3992	12.8638	12.2679	12.3758	12.1169	12.4168	12.2606	12.422	13.2965	12.4765	12.6803
Diras2	14.4025	14.6927	15.0471	14.7237	15.1095	15.4744	15.3543	15.295	14.5876	13.8574	15.1229	14.9711	15.3924	17.1871	15.4439	15.8311
Dis3	17.2062	17.1476	16.9789	17.1896	17.0796	16.9721	16.8778	17.1076	17.3372	17.1239	17.1966	17.1861	16.6453	16.5237	16.9649	16.7107
Dis3l2	14.334	14.4167	14.4088	14.4525	14.6628	14.8131	14.9443	14.844	14.3433	14.3328	14.3922	14.366	14.6507	14.9209	14.4973	14.9239
Dkc1	18.0985	17.8935	17.7767	17.9059	17.93	17.831	18.082	18.1702	18.0632	18.1474	17.769	17.7689	17.8448	17.5732	17.8294	17.9485
Dlat	20.1528	20.2216	20.2303	20.2043	20.2039	20.284	20.4567	20.2997	19.9802	20.0957	20.1356	20.1569	20.6579	21.4719	20.6653	20.7352
Dlc1	16.0319	16.2046	16.152	16.0174	16.1207	15.6483	15.7081	15.8394	15.9405	16.0861	16.0464	16.1327	15.7434	15.556	16.0869	16.0603
Dld	22.6413	22.7774	22.6563	22.7132	22.7474	22.5275	22.8622	22.7399	22.6468	22.7572	22.6375	22.6253	22.651	23.1585	22.8219	22.8572
Dlg1	19.3221	19.3877	19.4159	19.3567	19.4915	19.6849	19.6811	19.5455	19.1353	19.3478	19.2705	19.2624	19.4589	20.1275	19.3392	19.58
Dlg4	12.2325	12.2381	12.1023	12.2133	12.1172	12.6931	12.5063	12.2729	12.4798	12.131	12.3208	12.2446	12.6537	13.755	12.3738	12.5446
Dlgap4	17.0625	17.3608	17.438	17.3535	17.2562	17.2159	17.183	17.1303	17.095	17.2606	17.0943	17.0553	17.3901	17.188	17.4206	17.5395
Dlst	19.9351	20.0994	20.0981	20.0434	19.9898	20.1333	20.1511	20.0507	19.947	20.0079	19.9974	20.102	20.2155	20.6438	20.1999	20.3292
Dmap1	16.0067	15.8201	15.8328	15.815	15.7825	16.1703	17.8373	16.0745	15.8262	15.8901	15.7853	15.7752	15.6437	15.8337	15.6697	15.2959
Dmd	18.5037	18.6374	18.7005	18.4915	18.4857	18.1459	17.8417	17.9241	18.1683	18.5296	18.4176	18.3687	18.7711	18.3885	19.0098	18.8077
Dmtn	15.3158	15.2317	15.1567	15.2982	15.3515	15.0978	15.3323	14.7151	14.5365	15.1273	15.0342	14.7257	15.1154	16.0266	15.3979	15.3772
Dmxl1	14.217	13.9627	13.9049	13.8066	14.1945	14.4569	14.1565	14.1378	14.0253	14.0477	14.0151	13.9874	14.0342	14.552	14.0803	14.2422
Dmxl2	14.3745	14.8331	14.8806	14.8964	14.902	15.4746	15.1638	15.2674	14.5911	14.3999	14.9111	15.135	15.2825	16.9552	15.2085	15.8669
Dnaaf5	12.1858	12.5143	12.3578	12.4959	12.3408	12.3952	12.4351	12.3964	12.5304	12.4989	12.5358	12.9484	12.5796	13.3812	12.6188	12.2149
Dnaja1	18.2672	18.3979	18.4826	18.3656	18.4837	18.0563	17.9359	18.2725	18.522	18.4707	18.5324	18.5236	18.093	18.1133	18.2939	18.18
Dnaja2	19.6354	19.6528	19.6735	19.7133	19.7369	19.8622	19.9744	19.8812	19.7195	19.6782	19.7265	19.6692	19.7822	20.0338	19.8706	19.9671
Dnaja3	16.4992	16.4949	16.6479	16.6538	16.5781	16.4977	16.6998	16.5306	16.6742	16.4736	16.69	16.6541	16.7372	16.5127	16.5529	16.6941
Dnaja4	17.303	17.3922	17.5	17.6404	17.463	17.5489	17.4863	17.6025	17.4825	17.4959	17.5595	17.5426	17.7592	17.9777	17.3741	17.5213
Dnajb1	17.07	17.1712	17.1497	17.243	17.2607	17.2646	17.3012	17.2906	17.4654	17.1555	17.2431	17.2595	17.0897	17.2387	16.9702	17.0898
Dnajb11	17.9241	17.9071	18.0422	17.982	17.9776	17.6057	18.0274	17.8852	18.112	18.0738	18.1345	17.9733	17.8169	17.3201	18.0308	18.0665
Dnajb2	15.9697	16.1044	16.3711	16.1614	16.3062	15.9398	15.9812	16.2419	16.1479	15.8438	16.3381	16.1989	16.2203	17.0596	16.262	16.1512
Dnajb4	18.5969	18.7465	18.6654	18.7763	18.668	18.7165	18.8342	18.6549	18.5058	18.7814	18.576	18.5025	19.1509	19.2357	19.1697	19.5258
Dnajb5	13.2885	13.2689	13.347	13.2818	13.2102	13.2187	13.3324	13.0821	13.6229	13.1774	13.4055	13.207	13.21	13.4623	13.1615	13.0134
Dnajb6	17.9395	17.9627	18.1393	18.2229	18.1936	18.3627	18.3132	18.4621	18.3321	18.0164	18.1986	18.1338	18.0982	18.2475	17.9974	17.921
Dnajc1	14.1341	14.1832	14.2336	14.3078	14.2791	14.3615	14.4243	14.133	14.3074	14.3326	14.2128	14.2333	14.1672	14.5788	14.1844	14.1263
Dnajc10	18.8083	18.7565	18.7232	18.747	18.7723	18.6044	18.6128	18.8325	18.8525	18.795	18.6953	18.67	18.9147	18.2755	18.9232	18.8124
Dnajc11	16.7597	16.7789	16.814	16.8358	16.7791	17.1103	16.6814	16.9521	16.7252	16.8795	16.6963	16.8087	17.0909	17.7694	17.0263	17.2986
Dnajc16	13.861	13.8842	13.8762	14.0563	13.9428	13.8943	13.8638	14.2695	14.17	13.8341	14.0501	13.9327	14.1621	14.5533	13.8705	14.3573
Dnajc2	15.0865	15.0208	14.9626	14.9482	14.9631	15.4188	15.4899	14.9975	15.0243	15.0607	15.1523	14.813	15.3456	15.1919	15.0169	14.7946
Dnajc24	15.1621	14.9407	15.0586	15.1088	15.0607	14.7184	15.1921	14.9624	15.1	14.8879	15.0736	15.163	15.1837	15.7006	15.28	15.6348
Dnajc3	18.1464	18.1667	18.14	18.0701	18.0274	18.3133	18.5738	18.4708	18.0621	18.129	18.1553	18.0976	18.1212	17.8139	18.1983	18.3544
Dnajc5	16.2603	16.3295	16.4591	16.4018	16.3802	16.2076	16.2411	16.4357	16.3693	16.1062	16.5026	16.3188	16.4759	17.5888	16.2881	16.702
Dnajc7	17.6813	17.7952	17.8907	17.8256	17.8775	17.7694	17.8691	17.8939	17.7892	17.7742	17.9219	17.9564	17.7367	17.8511	17.8124	17.607
Dnajc8	18.1964	18.2134	18.2679	18.297	18.3944	18.1349	18.1879	18.1449	18.4852	18.2256	18.3049	18.2506	17.909	17.1991	17.9149	17.7246
Dnajc9	17.9973	17.9615	17.8723	18.0743	18.0072	18.0787	17.7931	17.8096	18.0969	17.9687	18.0045	18.3764	18.316	18.411	18.0505	17.8009
Dnase2	13.8661	13.8504	13.5894	13.4414	13.7714	14.1583	12.9755	13.0138	13.8353	13.9114	13.87	14.1787	14.0981	12.7305	13.547	13.8392
Dnm1	17.4665	17.7248	18.2549	18.0989	18.5486	18.7507	18.7252	18.22	17.6281	16.7507	18.4659	18.2157	19.3568	21.0036	18.7654	19.7821
Dnm1l	19.4089	19.4454	19.4116	19.4455	19.4528	19.2191	19.4793	19.504	19.3211	19.2961	19.2769	19.2377	20.329	20.6502	19.8973	20.4023
Dnm2	21.5601	21.5543	21.6008	21.5935	21.6949	21.7092	21.5503	21.6165	21.6289	21.4435	21.5877	21.6333	21.5067	21.9204	21.5504	21.6153
Dnm3	19.2544	19.2437	19.3662	19.4768	19.4509	19.0932	19.0871	19.1017	19.462	19.1607	19.2961	19.3056	19.1698	19.2926	19.1226	19.0649
Dnmt1	17.1337	16.9999	16.9462	17.0999	16.9527	17.1341	17.0874	17.0812	17.0603	17.1976	17.2374	17.0064	16.9736	16.4461	16.9546	16.7653
Dnpep	18.8987	18.9141	18.8871	18.9822	19.0024	18.8041	18.7685	18.8657	18.8748	18.9143	18.8754	18.852	18.6843	18.0586	18.8102	18.7716
Dnttip1	15.3959	15.6175	15.6814	15.973	15.7639	14.7406	15.4467	15.3362	15.6645	15.6733	15.7481	15.8012	15.5507	14.4506	15.5035	15.2805
Dnttip2	13.1731	13.2262	13.1194	13.12	13.0781	12.9268	13.1473	13.1461	13.0483	13.1221	13.1734	13.0828	12.9441	13.2304	12.9567	13.0412
Dock1	19.3012	19.3404	19.3791	19.4417	19.3633	19.3401	19.2932	19.4689	19.3923	19.3008	19.3279	19.2772	18.8627	18.8923	19.2	19.0308
Dock10	15.4235	15.5122	15.1533	15.1993	15.195	14.9729	14.6076	14.6949	14.6277	15.223	15.348	15.0966	15.742	16.6995	15.6869	15.8477
Dock11	14.3173	14.2928	14.264	14.1898	14.0744	14.1929	14.3437	13.9825	13.9595	14.1707	14.1822	14.0984	14.6533	14.2454	14.4117	14.8481
Dock4	17.0625	16.9283	17.0949	17.216	17.1606	17.1687	17.1132	17.4101	17.2788	16.9935	17.1354	17.1525	16.9736	16.6309	16.8846	16.8477
Dock5	13.0698	13.3618	13.184	13.6664	13.5054	13.4456	13.7839	13.597	13.5501	13.1523	13.4193	13.3859	13.3475	12.8848	13.1232	13.0255
Dock6	20.1544	20.0162	20.0397	19.9705	20.0778	20.0153	19.618	19.957	20.0487	20.1201	19.9687	20.0376	19.8953	19.2062	19.9482	19.7519
Dock7	18.276	18.4745	18.0206	19.3616	18.6437	18.7703	17.0668	17.4213	17.8595	18.4603	18.4491	20.2478	20.6684	20.9309	19.6547	18.8342
Dock9	20.9827	21.0229	21.0716	21.1329	21.1815	21.148	21.0129	21.1949	21.2111	21.0801	21.0662	21.0965	20.6612	20.0952	20.9281	20.6206
Dop1b	14.5839	14.6389	14.6912	14.3484	14.739	13.9454	14.0903	14.3621	14.9041	14.5801	14.6621	14.7777	14.4198	12.6332	14.6555	14.1489
Dpf2	15.959	15.8924	15.6689	15.727	15.8561	15.9173	15.7098	15.9298	15.7439	15.8954	15.7347	15.776	15.8495	15.3861	15.936	15.9175
Dpm1	17.5322	17.4674	17.293	17.3521	17.3789	17.3137	17.3821	17.7218	17.3356	17.4531	17.4035	17.3283	17.5146	17.3413	17.5418	17.592
Dpp3	19.4114	19.3636	19.3291	19.4514	19.4872	19.3401	19.4286	19.3831	19.3888	19.2879	19.3214	19.3569	19.1074	19.2813	19.2903	19.4096
Dpp4	17.2841	17.41	17.4822	17.6549	17.4248	17.5087	17.7455	17.3429	17.3109	17.1463	17.2842	17.3706	17.3052	16.7947	17.1571	17.2872
Dpp6	12.9869	13.281	13.1684	13.2655	13.511	14.0266	14.0342	13.1216	13.0309	12.9175	13.6039	13.5869	14.4865	16.5815	14.2082	14.552
Dpp7	16.2768	16.3241	16.0058	15.7875	15.9006	15.7863	16.0015	16.1632	16.1588	16.139	16.2506	16.3128	16.3675	15.6664	16.0714	15.7456
Dpp8	16.0354	16.1531	16.1533	16.1552	16.1956	16.2322	16.1742	16.2108	16.054	16.049	15.9882	16.0035	16.1242	16.595	15.9473	16.1906
Dpy19l1	14.1766	14.1302	13.9512	14.3659	14.0553	14.1707	14.7049	14.3793	14.0483	14.2083	14.069	14.1118	14.4718	14.5601	14.0807	14.2626
Dpy19l4	15.1316	15.1925	15.2433	15.5204	15.3646	15.1311	13.1224	15.1595	15.5321	15.4293	15.2087	15.5934	15.7758	15.5432	15.1915	15.2985
Dpy30	14.2382	14.2531	14.4553	14.4166	14.3344	14.0251	14.0107	14.1345	14.5206	14.3227	14.2983	14.3708	13.9043	12.6051	14.0929	13.8562
Dpysl2	22.8839	23.1146	23.1921	23.0696	23.2956	23.6072	23.4906	23.1234	22.8673	22.714	23.2538	23.162	23.2417	24.9077	23.3107	23.3839
Dpysl3	19.4254	19.6866	19.6135	19.6264	19.4968	20.027	19.9281	19.5904	18.7741	19.4557	19.3871	19.3045	20.0609	20.9716	20.0736	20.3093
Dpysl5	15.3741	15.7734	16.194	16.0071	16.2379	17.1123	17.1405	16.1884	15.4247	14.2619	16.1292	16.0285	16.7739	18.5752	16.6125	16.9742
Dr1	13.109	13.0403	13.0576	13.2179	13.2529	12.6561	13.0235	13.2471	13.3894	13.0544	13.0431	13.1931	13.4245	13.2904	12.9127	12.5416
Drap1	15.4137	15.4924	15.1619	15.2798	15.196	15.6293	15.2586	15.727	15.3798	15.2771	15.092	15.1319	15.2111	15.4678	15.0992	15.4138
Drg1	17.705	17.8592	17.8594	17.8737	17.8835	17.3921	17.7099	17.8242	17.9261	17.7333	17.9086	17.8736	17.8467	17.8524	17.6651	17.8753
Drg2	16.3143	16.5429	16.7207	16.8515	16.6319	16.2612	16.0039	16.4757	16.6526	16.3448	16.5867	16.5022	16.5497	16.6235	16.571	16.6281
Dsp	17.031	17.1457	16.985	16.9683	16.8353	17.182	19.0666	17.3895	16.5793	17.1422	16.8801	16.9481	17.5363	17.4667	16.9509	17.5309
Dst	18.0179	18.0062	18.0463	18.0758	18.0775	18.144	18.2687	18.0737	17.8543	17.9369	18.1286	17.998	18.1286	18.6217	18.0661	18.3002
Dstn	21.5326	21.8167	21.4024	21.5794	21.4871	21.8943	21.7668	22.028	21.0025	21.6852	21.2849	21.2106	22.0495	22.4607	22.0636	22.2447
Dtd2	15.2257	15.2908	15.1497	15.2653	15.1678	15.0044	15.414	15.3042	15.3498	15.2502	15.1065	15.0228	14.9356	14.1177	15.0448	14.8937
Dtna	16.1491	16.412	16.3933	16.1576	16.2839	16.1281	16.1551	16.2509	16.4023	16.3507	16.6343	16.5896	17.3172	16.7791	17.533	17.4346
Dtnb	13.4816	12.9964	12.8859	13.253	12.8533	14.6025	13.9578	12.738	13.141	13.0395	13.2551	14.142	14.8914	15.6114	13.5669	13.8337
Dtnbp1	14.4452	14.422	14.2325	14.4245	14.4103	14.7886	14.7409	14.7806	14.1286	14.253	14.082	14.112	14.0383	14.2978	14.3527	14.6225
Dtx3l	16.5911	16.4328	16.563	16.6474	16.3975	16.2372	16.4972	16.4447	16.8028	16.57	16.6115	16.401	15.7319	15.4282	16.2227	15.9551
Dtymk	12.7187	12.618	13.0125	13.2352	13.0967	12.6233	12.8503	13.0826	13.0363	12.7178	13.0635	13.1297	13.3633	13.0241	12.9328	13.0531
Dus3l	15.8542	15.7993	15.5963	15.8244	15.7215	15.1876	15.3939	15.3478	15.9036	15.6969	15.7845	15.7571	15.1202	14.9295	15.7316	15.4943
Dusp15	13.2016	13.906	14.4491	14.1114	14.9911	14.7478	14.8053	14.4044	14.0423	12.296	14.4808	14.2994	15.1746	16.5022	15.2982	15.7566
Dusp23	13.0817	13.146	13.3452	13.4904	13.377	13.1109	13.3932	13.155	13.8868	13.5577	13.4646	13.3747	13.1765	13.1771	12.896	13.156
Dusp27	14.6217	14.529	14.7648	14.6208	14.7641	14.879	15.0218	15.0577	14.9333	14.4887	14.3136	14.7697	14.4224	15.009	14.7146	14.9362
Dusp3	20.1756	20.2791	20.2256	20.1875	20.4122	20.4491	20.2596	20.2794	20.2801	20.2002	20.3945	20.2984	19.925	19.2973	20.1065	20.122
Dync1h1	23.3211	23.4223	23.4649	23.5036	23.482	23.4918	23.3873	23.4498	23.4071	23.351	23.4563	23.4226	23.5701	23.8699	23.4561	23.6302
Dync1i1	11.9196	12.1684	12.1923	12.286	12.4061	12.4926	12.6003	12.3072	12.4	12.0963	12.5054	12.2714	12.193	13.6209	12.6112	12.8416
Dync1i2	18.5135	18.4071	18.3094	18.3939	18.4052	18.5627	18.4922	18.8655	18.0752	18.3207	18.1586	18.092	18.6549	18.5562	18.5612	18.3443
Dync1li1	19.3077	19.2694	19.4108	19.3217	19.3852	19.4878	19.3378	19.2054	19.4819	19.3342	19.4308	19.3876	19.1899	19.5017	19.1715	19.2462
Dync1li2	18.2951	18.2161	18.2544	18.1625	18.2913	18.5846	18.383	18.4214	18.0542	18.1818	18.1383	18.0386	18.3595	18.6267	18.3454	18.3546
Dynll1	18.6316	18.6608	18.8054	18.5049	18.4969	18.347	18.1962	18.0567	19.0643	18.7625	18.9053	19.1045	18.7666	18.5921	18.4918	18.1212
Dynll2	18.384	18.6321	18.9077	18.3658	18.7106	18.6321	18.2708	18.0606	18.676	18.2988	18.8492	18.8303	18.54	19.181	18.1273	18.1858
Dynlrb1	17.6089	17.6081	17.6757	17.3464	17.6478	16.9017	16.9633	16.9617	17.5944	17.4596	17.6842	17.6675	17.1912	17.5083	17.3375	16.6556
Dynlt1	14.1481	14.1344	14.3972	14.3543	14.2938	13.9744	14.3516	13.9241	14.1161	14.2238	14.411	14.4248	13.9544	14.6861	13.9604	13.9568
Dyrk1a	15.4258	15.6834	15.6347	15.6524	15.6415	15.9323	15.1019	15.8724	15.6147	15.5565	15.6619	15.625	15.2534	15.6972	15.4685	15.6291
Dysf	20.8632	20.8047	20.7649	20.7797	20.7673	20.5991	20.4509	20.9188	21.0293	20.8279	20.7177	20.6297	20.7931	20.1365	20.7736	20.7482
Ear3	15.0024	14.3303	14.1774	14.5248	14.4391	12.9685	13.547	14.5571	14.6423	14.9365	14.2438	13.9034	14.8192	15.6448	15.6412	16.032
Ebag9	12.8446	12.8271	12.6344	12.7335	12.5594	13.3666	12.7809	12.6814	12.8211	12.7635	12.8764	12.9935	12.5215	12.7596	12.7111	12.643
Ebf1	14.9232	15.065	14.6298	14.7767	14.8461	14.1345	14.471	14.7834	14.6976	15.0805	14.7403	14.8989	14.962	14.7643	14.9531	14.3922
Ebna1bp2	16.4456	16.3766	16.1586	16.2501	15.8847	16.0037	16.5361	16.0163	16.0934	16.214	16.312	16.3116	15.8782	16.3112	16.0453	15.8153
Ece1	17.2168	17.0763	17.1018	17.0548	17.056	16.9089	16.8447	17.1411	17.231	17.1421	17.125	17.1423	16.9745	16.4179	17.2448	17.1837
Ech1	19.8286	19.8012	19.7792	19.8354	19.8019	19.8412	20.0454	19.7858	19.6883	19.8865	19.7113	19.7211	19.8075	19.1006	20.0003	20.0209
Echdc1	16.3946	16.4204	16.4187	16.3627	16.3546	16.2647	16.8065	16.4719	16.4716	16.2156	16.638	16.3945	16.6699	17.2243	16.577	16.7023
Echs1	20.5836	20.4556	20.4681	20.4564	20.5068	20.4635	20.8337	20.406	20.2329	20.6503	20.3917	20.3638	20.4999	20.6892	20.5623	20.5488
Eci1	20.8255	20.6775	20.6431	20.4664	20.5908	20.5319	20.7513	20.592	20.5404	20.8834	20.4976	20.6133	20.7636	20.2076	20.8493	20.7857
Eci2	19.0335	18.9352	19.0256	18.9793	19.076	19.1105	19.3077	18.9049	18.8331	19.141	18.9157	18.9527	18.9101	18.686	19.1603	18.9806
Ecpas	17.7346	17.7483	17.7665	17.8426	17.7736	17.3741	17.6691	17.6879	17.7624	17.7564	17.8091	17.7128	17.7253	17.7564	17.7891	17.8388
Ecscr	13.2154	13.1223	13.1257	13.0589	13.3974	13.517	13.5811	13.2875	13.6512	13.3374	13.5931	13.1509	13.3069	12.7597	13.156	12.9766
Edc3	13.1286	13.1398	13.1096	12.8815	12.9159	13.0869	13.1983	12.9397	13.1853	13.1089	13.2176	13.1643	13.024	13.2384	12.7635	12.6856
Edc4	17.5338	17.4659	17.3461	17.2559	17.3554	17.5469	17.1743	17.4915	17.3711	17.4749	17.3651	17.438	17.2128	17.1127	17.3916	17.1406
Edem3	12.864	13.0856	13.157	13.0983	12.7142	12.9349	12.6882	13.4136	13.1677	13.0484	13.2295	12.8342	13.273	12.8194	12.9444	12.5815
Edf1	17.9296	18.2827	18.1524	18.0526	18.2105	18.2426	18.4049	18.2289	18.2921	18.1119	18.1855	18.1278	17.7725	17.1154	18.0742	17.8075
Edil3	13.0729	12.7464	12.9363	12.9898	13.065	13.7247	13.3684	13.3284	13.1682	12.9319	13.2297	13.9272	13.6664	14.9031	13.4065	13.837
Eea1	20.6181	20.6821	20.6783	20.6401	20.6636	20.6654	20.8545	20.7259	20.6332	20.6855	20.5714	20.6361	20.475	20.0522	20.4224	20.3069
Eed	15.8483	15.939	15.9524	16.0096	15.9077	16.0333	15.8597	15.9703	16.0355	15.8154	15.964	16.0498	15.9851	15.8448	15.885	15.9758
Eef1a1	23.8371	23.8955	23.7897	23.8513	23.8866	23.9382	24.0584	24.1178	24.0093	23.7873	23.8468	23.7488	23.7666	23.6746	23.7311	23.7474
Eef1a2	16.1638	16.206	16.6155	16.7221	16.7527	17.5085	17.4752	16.8864	16.394	15.3849	16.4025	16.4983	18.6532	19.5456	17.9415	19.0887
Eef1akmt1	12.2176	12.105	12.1666	12.3654	12.3407	12.2625	12.5053	12.2133	12.4566	12.2262	12.3083	12.2725	12.0108	12.8662	12.2645	12.4766
Eef1akmt2	14.3009	14.4457	14.5015	14.3898	14.2786	14.7394	14.6601	14.6113	14.4516	14.4112	14.554	14.366	14.6739	14.6032	14.3492	14.2907
EEF1AKNMT	12.2919	12.0829	12.0579	12.1128	12.0879	12.2583	12.433	12.3325	12.3275	12.0928	12.2745	12.1302	12.0591	12.7884	11.9358	12.2289
Eef1b	18.8828	18.6833	18.5796	18.4422	18.6547	18.827	18.8372	18.7361	18.7517	18.8471	18.6799	18.5862	18.6437	18.4109	18.855	18.8312
Eef1d	18.6394	18.3657	18.3675	18.1692	18.4208	18.5649	18.6337	18.4454	18.4945	18.4888	18.436	18.4236	18.7064	18.2993	18.54	18.5883
Eef1g	20.9583	20.8507	20.8559	20.7703	20.9086	21.0706	21.0376	21.1431	20.9383	20.8366	20.7951	20.6441	20.8337	20.8962	20.9084	21.1128
Eef2	22.5855	22.5934	22.5835	22.5741	22.6082	22.5539	22.6378	22.7249	22.634	22.5432	22.6177	22.4921	22.3569	22.146	22.4425	22.3377
Eef2k	14.8882	14.4585	14.3203	14.8746	14.5651	14.8912	14.5431	14.099	14.4702	14.4508	14.4563	14.9149	14.9551	15.52	14.3378	14.5759
Eefsec	16.3082	16.3184	16.3164	16.3567	16.3326	16.0521	16.4473	16.1297	16.2929	16.2926	16.4597	16.3434	16.0931	15.9112	16.4821	16.1113
Efhd2	20.0782	20.3829	20.2909	20.1695	20.279	19.8354	19.8463	19.8726	19.8375	20.0065	20.2036	20.0007	20.2318	20.4161	20.2298	20.3513
Efl1	15.7835	15.775	15.8306	15.825	15.9776	15.3833	15.3699	15.8298	15.9765	15.9727	15.8856	16.1152	15.5409	15.0588	15.6003	15.5585
Efr3a	13.4056	13.6769	13.271	13.5833	13.4545	13.5605	13.4358	13.6812	13.5124	13.438	13.5518	13.5313	13.776	14.1164	13.5179	13.8941
Efr3b	16.6213	16.5169	16.6215	16.5771	16.5931	16.7037	16.5451	16.8829	16.7292	16.5085	16.5888	16.6989	16.499	15.8734	16.4468	16.2922
Eftud2	20.6583	20.5903	20.4914	20.5474	20.5116	20.5953	20.4427	20.6363	20.6412	20.7085	20.5678	20.6224	20.7327	20.6757	20.67	20.7917
Egfr	12.3605	12.1399	12.5634	12.5638	12.5928	12.616	13.0545	12.5882	12.8493	12.7128	12.7293	12.8684	12.4768	13.214	12.5473	12.8285
Ehbp1l1	14.099	14.3893	14.1275	14.0689	14.0481	13.7023	13.7757	14.3041	14.4904	14.2488	14.3696	14.2293	14.1504	13.1951	14.0472	14.1834
Ehd1	20.9729	21.1689	21.1456	21.1127	21.1737	21.1521	20.903	21.0981	20.8281	20.9901	20.7425	20.7661	21.0741	20.8786	21.0432	21.3266
Ehd2	22.0543	22.2193	22.0097	22.0894	22.1082	22.0621	21.825	22.1265	21.9844	22.2532	21.8495	21.7466	22.2002	21.7939	22.1784	22.2754
Ehd3	19.0255	19.3067	19.1887	19.1491	19.2129	18.9079	18.7305	18.8594	18.8558	19.1778	18.9853	18.8575	19.3896	19.296	19.5115	19.7628
Ehd4	21.4225	21.4591	21.3652	21.3575	21.3771	21.5061	21.543	21.5715	21.5352	21.4712	21.2488	21.171	21.3142	21.0774	21.5178	21.6568
Ehhadh	13.406	13.1606	13.2964	13.296	12.9622	13.4228	16.3522	13.6574	13.2793	13.3478	13.1914	13.41	13.1492	13.318	13.2107	13.3854
Ehmt1	13.9009	13.8103	13.8343	13.7889	13.7571	13.8318	13.9321	13.6486	13.9787	13.839	13.8944	13.8196	13.4386	13.6918	13.7884	13.6473
Eif1	18.3948	18.3818	18.4095	18.4285	18.5482	18.3125	18.4228	18.383	18.2252	18.3566	18.5256	18.226	18.2042	17.834	18.3455	17.9574
Eif1ad	12.8715	13.4254	13.0413	13.2883	13.3163	12.5535	13.4714	13.1484	13.6042	13.2289	13.3012	13.2015	13.0284	13.1618	12.8517	12.5778
Eif1ax	16.2741	16.2744	16.2901	16.2017	16.4227	16.5027	16.6366	16.2297	16.5982	16.2979	16.474	16.3241	16.2507	16.2565	16.1198	16.1057
Eif2a	16.907	16.9149	16.9063	17.0551	16.9019	16.9864	17.0907	17.0002	16.9632	17.4182	16.9966	16.8999	16.8352	16.7162	16.9264	16.8295
Eif2ak2	14.4317	14.7743	14.8398	14.7326	14.7144	14.7344	13.9475	14.7495	14.8702	14.4938	14.9629	14.694	13.7928	12.828	14.1645	14.1441
Eif2b1	13.1087	12.923	12.9809	13.1046	13.0901	13.4706	13.3742	13.1133	13.1017	12.9739	13.1623	13.3076	13.5241	13.851	13.1128	13.542
Eif2b2	16.0992	16.069	16.113	16.0457	16.0029	16.2887	16.2034	16.0567	16.0028	15.9905	16.0639	16.1979	16.171	16.3297	16.1761	16.1466
Eif2b4	15.4539	15.6194	15.5407	15.488	15.5705	15.0558	14.4442	15.4949	15.6555	15.4395	15.5825	15.585	15.5168	15.5791	15.4053	15.4204
Eif2b5	14.8667	14.8317	15.0296	14.733	14.7517	15.0227	15.1657	15.0002	14.763	15.9848	14.8553	14.8971	15.1343	15.3841	15.1988	14.9825
Eif2s1	18.8753	18.8537	18.8348	18.8847	18.8369	18.9126	19.0454	19.2469	18.8391	18.7923	18.8114	18.7298	19.2765	18.9918	18.9702	19.1863
Eif2s2	17.8225	17.95	17.969	18.026	18.0901	17.8385	18.1898	18.155	18.075	17.8686	18.0667	17.8368	17.9178	17.7412	17.9805	18.0269
Eif2s3x	18.3828	18.3686	18.3402	18.4864	18.3481	18.3417	18.5575	18.5712	18.5201	18.3787	18.4477	18.3454	18.3497	18.394	18.374	18.4464
Eif3a	20.4625	20.6087	20.5705	20.5673	20.5311	20.274	20.4254	20.5711	20.6054	20.4488	20.5366	20.5146	20.2781	19.7843	20.3613	20.265
Eif3b	19.4984	19.5196	19.4589	19.5554	19.4846	19.5754	19.2864	19.6923	19.4759	19.4774	19.5005	19.451	19.6504	19.3994	19.6246	19.5785
Eif3c	19.5803	19.5684	19.5141	19.5571	19.6192	19.7671	19.7454	19.8655	19.45	19.5602	19.5653	19.3891	19.3654	19.1278	19.4268	19.5083
Eif3d	18.0412	17.9882	18.1001	17.9648	18.0571	18.0728	17.8508	18.0172	18.0486	18.1421	18.0422	18.0444	17.8466	17.3819	18.0626	18.0249
Eif3e	19.0394	19.1245	19.1372	19.2148	19.1183	19.1889	19.2303	19.3248	19.267	19.0674	19.2189	19.1947	19.526	19.0557	19.2358	19.5905
Eif3f	18.6543	18.6631	18.6798	18.6611	18.692	18.3807	18.2956	18.663	18.5528	18.5102	18.707	18.5825	18.6351	18.0196	18.5806	18.509
Eif3g	17.8731	17.7627	17.7411	17.6693	17.7646	18.0484	17.9572	17.8714	17.7492	17.8877	17.7793	17.7141	17.6743	17.2558	17.787	17.6849
Eif3h	18.5176	18.6408	18.5895	18.5774	18.5669	18.6189	18.4607	18.6936	18.6383	18.5794	18.6117	18.6393	18.4823	18.2289	18.539	18.474
Eif3i	19.228	19.1422	19.0293	19.0335	19.0209	19.3021	19.208	19.3758	19.0174	19.1513	19.0657	19.0488	19.0768	18.8662	19.2864	19.1414
Eif3j2	19.1723	19.2013	19.3085	19.3609	19.2894	19.199	19.2937	19.1883	19.2935	19.1791	19.3049	19.156	19.0628	19.1929	19.1273	19.0859
Eif3k	17.2798	17.1971	17.2139	17.2288	17.3101	17.0591	17.1452	17.1682	17.2599	17.1956	17.2757	17.2445	17.2806	17.3266	17.2173	17.3002
Eif3l	19.6402	19.6246	19.5606	19.6491	19.5388	19.7318	19.6947	19.853	19.5616	19.5981	19.6401	19.5502	19.7986	19.419	19.712	19.9228
Eif3m	17.3234	17.3782	17.3765	17.4705	17.2476	17.1443	17.0491	17.5903	17.4164	17.4177	17.4253	17.3537	17.5749	17.3322	17.4003	17.5697
Eif4a1	20.7469	20.7557	20.7189	20.7194	20.6916	20.6807	20.7574	20.77	20.7189	20.6858	20.7	20.6619	21.0814	20.9544	20.8361	21.0774
Eif4a2	18.4643	18.4137	18.1699	18.2864	18.2755	18.7875	18.7923	18.7566	18.1868	18.3342	18.1294	18.1612	19.4658	19.5052	18.9475	19.2596
Eif4a3	19.4311	19.2631	19.1752	19.3439	19.1442	19.2075	19.1439	19.3726	19.3309	19.3596	19.198	19.1639	19.2233	18.8511	19.323	19.5462
Eif4b	17.761	17.7906	17.9027	17.9275	17.9768	17.9021	18.039	17.7088	17.648	17.6398	17.672	17.6966	17.4727	17.4247	17.6403	17.6452
Eif4e	18.0729	18.2818	18.2721	18.3381	18.2568	18.0901	17.9006	18.2608	18.4459	18.1748	18.2681	18.244	18.3353	18.1628	18.3091	18.2476
Eif4e2	16.3152	16.2933	16.2164	16.3907	16.3917	16.3633	16.1752	16.5176	16.437	16.3692	16.2996	16.2	16.8416	16.7228	16.5014	16.693
Eif4e3	14.4651	14.8186	14.8456	14.9727	14.8884	14.7593	14.7015	14.2199	14.7879	15.8352	14.6423	14.7478	14.5532	14.3856	14.5307	14.667
Eif4ebp2	13.4713	13.4102	13.1915	13.1825	13.379	13.6137	13.2926	13.0263	13.3941	13.2498	13.2925	13.1118	13.4189	13.8769	13.4089	13.0983
Eif4enif1	14.0617	14.1978	14.1403	14.1762	14.386	14.4829	13.197	13.6917	14.0122	13.802	13.9654	13.9975	14.6625	13.5377	14.3524	13.4159
Eif4g1	19.5195	19.5769	19.5551	19.4832	19.5192	19.6413	19.5788	19.6492	19.5511	19.5473	19.6111	19.6211	19.5327	19.3763	19.5093	19.5766
Eif4g2	18.7182	18.7953	18.8808	18.9385	18.8302	18.6002	18.7444	18.8067	18.8376	18.7371	18.8516	18.9028	18.6136	18.4478	18.6458	18.5833
Eif4g3	16.7025	16.8074	16.7483	16.8237	16.6992	16.5132	16.4146	16.6028	16.8142	16.6006	16.8356	16.7658	16.8222	16.4569	16.5932	16.5678
Eif4h	17.8307	17.8456	17.8468	17.8259	17.9656	18.2409	18.0027	18.0878	17.5901	17.9735	17.6133	17.739	17.8974	17.9791	18.0428	18.0198
Eif5	18.1578	18.2295	18.2373	18.2172	18.266	18.0157	18.2998	18.101	18.2631	18.0448	18.253	18.2085	18.0483	18.1118	18.0125	18.0563
Eif5a	20.974	21.0864	20.8901	20.9611	21.0573	20.7231	20.9701	20.8466	21.044	20.9741	20.9324	20.8204	21.0901	20.7143	21.1327	20.9666
Eif5b	17.9025	17.8696	17.8285	17.8907	17.8582	17.7154	17.9478	17.8802	17.7889	17.9083	17.9502	17.9011	17.9896	17.8133	18.0242	17.8117
Eif6	15.5371	15.556	15.3883	15.4748	15.4508	15.8857	15.8321	15.7585	15.5352	15.4743	15.6007	15.4321	15.4031	15.5421	15.4976	15.8386
Eipr1	14.4706	14.38	14.5589	14.4593	14.3648	14.4808	14.6184	14.5953	14.5527	14.5037	14.3767	14.6223	14.2565	14.5541	14.1631	14.4033
Elac2	14.6535	14.7332	14.6477	14.5778	14.5711	14.6276	14.4126	14.5023	14.8279	14.3989	14.5803	14.3843	14.7823	13.6773	14.2004	14.0701
Elavl1	19.0107	18.7982	18.711	18.5347	18.7565	18.7433	18.1482	18.7283	18.8059	18.9711	18.7839	18.8093	18.7502	17.8862	18.7857	18.5513
Elmo1	18.759	18.6015	18.626	18.7359	18.6929	18.5623	18.4569	18.4549	18.7553	18.5501	18.7357	18.6516	18.2965	18.413	18.4718	18.2898
Elmo2	17.3833	17.2661	17.3381	17.2803	17.29	17.0806	16.9559	17.3071	17.4042	17.3398	17.4325	17.4003	17.3572	17.3899	17.2194	17.1416
Elmod2	14.2101	14.3069	14.5588	14.5148	14.1409	14.0591	14.2413	14.5652	14.3045	14.5025	14.5503	14.4311	14.1408	14.2107	14.3715	14.1973
Eloa	15.9514	15.9312	15.6666	15.9414	15.877	16.1436	16.0014	15.9811	15.9372	16.0067	15.9906	15.8504	15.8702	15.2946	15.744	15.5839
Elob	19.4671	19.3732	19.42	19.4431	19.4193	19.5919	19.5348	19.3618	19.4074	19.2722	19.5869	19.4254	19.2165	19.4968	19.2455	19.1987
Eloc	19.1979	19.1792	19.0736	18.9173	19.1776	19.3273	19.6005	19.2587	19.1966	19.1546	19.0328	19.1193	19.3011	19.1696	19.2518	19.2832
Elp1	17.0218	16.997	17.0056	17.0601	16.9212	16.7852	17.0202	17.1678	17.0975	16.9801	17.003	17.0269	17.5939	17.7932	17.3516	17.6823
Elp2	16.0772	16.0032	15.9655	16.0694	16.0621	16.2624	16.3821	16.0905	16.1666	15.9699	16.0347	16.0086	17.2824	17.4735	16.6797	17.4319
Elp3	14.3058	14.2007	14.4628	14.3492	14.2235	14.5733	14.9867	14.543	14.3265	14.4361	14.4716	14.6134	14.6161	15.9028	14.6555	14.9569
Elp4	12.7967	12.7676	12.7678	13.1161	13.0286	12.9821	13.185	13.116	13.03	14.1336	12.874	13.1136	13.3415	13.7723	13.0368	13.2801
Emb	15.2878	15.6078	15.5524	15.3908	15.4979	15.9067	16.4851	16.102	15.4401	15.9731	15.3089	15.5442	16.4341	17.1185	16.0583	16.1965
Emc1	17.997	17.9393	17.9592	18.0092	17.9102	18.0828	17.9708	18.1847	18.0346	18.0251	18.015	17.9642	18.1371	18.0373	18.1246	18.1477
Emc10	15.2555	14.7481	15.0231	15.1532	14.9616	15.8815	15.6094	15.6985	15.022	15.1132	14.7684	14.9598	15.6478	15.722	15.4452	15.8582
Emc2	15.7426	15.5885	15.7092	15.83	15.7184	15.9603	15.5177	15.7513	15.8032	15.8142	15.7097	15.8589	15.7934	15.9021	15.9108	15.9809
Emc3	16.2994	16.0904	16.1593	16.094	16.1537	16.6303	16.3358	16.0499	15.9908	16.292	16.2061	16.0397	16.5003	16.8872	16.6869	16.5995
Emc7	16.1072	16.0517	16.0559	16.0317	16.0897	16.3267	16.3052	16.1021	16.1445	16.191	16.1312	16.1052	15.9455	16.16	16.4737	16.1962
Emc8	17.7405	17.5939	17.6247	17.6365	17.5792	17.6858	17.5361	17.5951	17.7387	17.7729	17.6064	17.6982	17.7152	18.1366	17.7824	17.7766
Emcn	14.4927	14.3289	14.375	14.0943	14.3107	14.2312	14.0891	14.1768	14.8506	14.1519	14.1715	14.4995	13.6258	13.1884	13.6213	13.3503
Emd	15.7575	15.7134	15.5606	15.5465	15.5819	15.9111	15.7512	15.4413	15.539	15.7721	15.584	15.6451	15.7531	15.5309	16.1044	15.8304
Emg1	13.5093	13.4456	13.2851	13.6294	13.4639	13.6518	12.9377	13.6925	13.4869	13.4267	13.4717	13.3357	13.3061	13.0134	13.5983	13.7378
Eml1	19.9394	20.0293	20.0143	20.027	20.0765	20.1495	19.9772	19.9015	19.7141	20.0332	19.9368	19.8258	19.6299	19.4868	19.7613	19.6755
Eml2	20.2743	20.4823	20.5208	20.4991	20.3878	20.4563	20.4471	20.356	19.7592	20.0161	19.8062	19.9043	19.8943	19.8169	20.256	20.476
Eml3	15.8006	15.7867	15.7979	15.889	15.8238	15.9456	15.8297	15.9971	15.8066	15.9164	15.8157	15.8856	15.7574	16.128	15.6568	15.5544
Eml4	16.2591	16.1298	16.2726	16.2306	16.3832	16.4439	16.268	16.3073	16.3949	16.2195	16.3105	16.2458	16.2211	16.2551	16.4222	16.4996
Emp2	16.9332	17.2414	17.1314	17.4706	17.2431	17.7121	17.2194	17.4502	16.8653	17.2403	17.0795	17.0516	17.3076	16.5839	17.195	17.2593
Enah	13.656	13.6081	13.3902	13.3868	13.3283	13.2239	13.6265	13.5353	13.2125	13.3775	13.3032	12.9131	13.156	13.1061	13.3749	13.3021
Endod1	19.0063	18.8058	18.9426	18.763	18.9079	19.3369	19.1049	19.0773	18.9652	18.923	18.7981	18.8858	19.1854	19.7419	19.0743	19.413
Eng	18.9972	18.9732	18.6548	18.8263	18.7609	20.1924	20.2026	20.1836	18.8301	18.9394	18.7429	18.7108	19.8616	20.8558	19.6039	20.4758
Engase	14.4462	14.3242	14.3357	14.412	14.4271	14.7159	14.1649	14.1124	14.5156	14.4267	14.6343	14.6542	14.8104	14.605	14.6235	14.2981
Eno1	23.597	23.7045	23.6048	23.5518	23.8099	23.8905	24.1904	23.7496	23.7773	23.56	23.6309	23.7155	23.489	23.8215	23.5314	23.6512
Eno2	19.0217	19.3012	19.9401	19.4856	20.1121	20.7758	20.5989	19.9959	18.9292	18.062	19.7519	19.7486	20.2478	22.0811	20.3369	20.9019
Eno3	12.8298	12.9099	12.6678	12.5891	12.7394	12.4059	12.9595	12.227	12.7585	12.7092	12.9942	12.6816	12.7143	13.3121	12.9494	13.0084
Enoph1	14.6225	14.739	14.5969	14.607	14.7574	15.0767	15.2265	14.8638	14.4679	14.4795	14.6846	14.6958	14.9669	16.0362	14.9859	14.7962
Enpep	21.824	22.0047	22.04	21.8718	21.9249	20.6818	20.3755	20.8464	21.599	21.8144	21.8049	21.749	22.2369	21.1846	22.22	22.3252
Enpp1	17.2141	17.327	17.2088	17.2856	17.3154	16.4871	16.3813	16.5739	17.0148	17.1812	17.2337	17.2584	18.2462	17.9827	17.9597	18.2115
Enpp2	16.5186	17.2564	16.707	15.9666	16.077	18.2164	18.1046	18.6138	16.286	16.9982	16.3476	17.301	16.2797	16.8745	16.5525	16.1681
Enpp4	18.0859	17.9885	18.042	17.9151	17.9594	18.1471	18.072	18.2048	18.0941	18.0878	18.0014	17.8717	17.9219	17.3084	17.8576	17.7613
Enpp5	15.1907	15.3474	14.9357	15.2003	14.9296	14.817	15.2235	15.0275	15.1297	15.2071	15.0327	15.2444	15.4483	15.5468	14.9426	15.1544
Enpp6	15.6884	16.167	16.7536	16.277	16.5399	17.0913	17.2121	16.4474	15.9039	14.8699	16.9835	16.8049	16.7713	19.4332	16.7617	16.7178
Ensa	16.8396	16.8643	17.0635	16.8114	16.811	16.652	16.6677	16.6037	17.0011	16.7375	16.8018	16.6461	16.7755	16.7303	16.3305	16.4341
Entpd1	20.5151	20.4007	20.3513	20.4286	20.5077	20.7559	20.483	20.7082	20.5372	20.5377	20.2458	20.1982	20.3586	19.645	20.5372	20.5885
Entpd5	15.1911	15.1534	14.9107	15.077	15.0469	14.9622	15.9049	15.2323	15.0849	15.0718	15.0998	15.2191	14.9623	14.8544	15.2045	15.1051
Eny2	14.3091	14.5804	15.0609	14.4268	14.512	14.3259	14.5308	13.8273	14.675	14.3049	14.5579	14.5081	14.9853	14.7997	13.7838	14.0314
Eogt	20.2298	20.1977	20.1626	20.3091	20.1902	20.5724	20.3481	20.6126	20.2114	20.3051	20.0889	20.0696	20.0455	19.5216	20.1465	19.9477
Ep400	14.173	14.2612	14.3246	14.3635	14.2277	13.5519	14.0768	14.0893	14.3762	14.4516	14.3369	14.1963	14.0584	13.5477	14.1842	13.8807
Epb41	19.4327	19.3372	19.2848	19.3022	19.3311	18.9832	18.9021	19.0951	19.4093	19.3953	19.3052	19.401	19.0262	18.0794	19.3376	19.3879
Epb41l1	16.0928	16.4644	16.5687	16.6409	16.4973	16.4719	16.8917	16.5737	16.2536	16.2249	16.4859	16.5418	17.6685	18.5529	17.2025	17.7539
Epb41l2	21.5449	21.5638	21.6419	21.5271	21.5421	21.3754	21.2424	21.1398	21.2427	21.5212	21.5231	21.5095	21.6532	22.0821	21.6288	21.6583
Epb41l3	18.393	18.4911	18.9704	18.6246	19.0043	19.4962	19.7449	18.8559	18.4386	17.7206	18.9765	18.8788	19.3322	20.6775	19.3988	19.8045
Epb41l4a	11.8669	11.8561	11.8695	11.7609	11.8699	12.6352	12.3816	12.1539	12.0349	12.0097	12.0532	11.8451	12.0308	12.9237	11.8319	12.0013
Epb41l5	12.5288	12.7978	12.7501	12.7085	12.5236	12.6109	13.4439	12.9797	12.7273	12.7377	12.7434	12.7954	12.7005	12.878	12.8639	12.5763
Epb42	18.3658	18.0968	17.9365	17.9892	18.1133	17.733	18.0329	17.6467	18.0675	18.1022	18.0839	17.9956	17.6021	17.1594	18.0814	17.7508
Epdr1	19.7901	20.1965	19.677	19.7818	19.7586	18.5093	18.2539	19.314	19.6227	19.8538	20.092	19.8345	20.3872	19.241	19.7713	19.7932
Epha2	13.0701	12.9545	13.2637	13.2402	13.1733	13.205	12.8982	13.5165	13.4266	13.186	13.5303	13.3126	13.3277	12.9339	12.8999	12.4664
Epha4	13.7405	13.2672	13.6911	13.7408	13.4016	13.3791	13.2061	13.2846	13.9113	13.5254	13.6849	13.7694	13.3118	14.1184	13.6821	13.5914
Ephb4	17.1314	16.9104	16.8886	16.9142	16.9375	16.972	17.0669	17.0816	17.1455	17.1048	16.9278	17.0103	16.6883	16.2988	16.8649	16.7666
Ephx1	21.5747	21.7203	21.7009	21.6702	21.6917	21.728	21.6799	21.7101	21.5689	21.6659	21.6098	21.71	21.4921	21.0183	21.6032	21.578
Ephx2	14.4241	14.1436	14.2961	14.3471	14.271	14.9438	17.7749	15.0302	14.093	14.3347	14.525	14.2949	14.9085	15.2437	14.567	14.6751
Ephx3	14.956	14.7318	14.7438	14.7744	14.97	14.2613	14.1463	14.8245	14.3429	14.8839	14.825	14.4533	15.4643	14.4422	15.0328	15.4096
Epm2aip1	16.1431	16.1248	16.2964	16.2607	16.4217	16.0485	16.2744	16.2165	16.3846	16.3973	16.2718	16.3383	16.8706	17.1869	16.3643	16.7616
Epn1	17.0001	17.0887	17.1647	17.0733	17.1831	17.2158	17.1129	17.0284	17.1619	16.9169	17.0536	17.0199	16.5803	17.2191	16.7585	16.7904
Epn2	18.6749	18.6937	18.6487	18.6292	18.6688	18.6707	18.2711	18.3881	18.5835	18.5908	18.5558	18.6131	18.3957	18.9027	18.4114	18.2545
Epn3	12.9253	13.0449	13.142	13.0953	13.1818	12.8325	12.681	12.5136	13.324	12.9519	12.9683	13.2443	12.4742	12.7276	12.821	12.4841
Eprs1	20.1825	20.1433	20.0954	20.0581	20.1022	20.2035	20.3987	20.1342	20.1634	20.1015	20.1338	20.104	20.029	19.9395	20.1136	20.1817
Eps15	18.7456	18.6365	18.6587	18.5975	18.6139	18.6453	18.6801	18.5147	18.5407	18.5845	18.5047	18.6056	18.4717	18.6011	18.5755	18.4582
Eps15l1	19.8335	19.7356	19.7637	19.7702	19.7925	19.9432	19.748	19.9305	19.8414	19.7897	19.7422	19.7494	19.5971	18.9856	19.6971	19.5173
Eps8	15.023	14.7212	14.8807	14.7653	14.5275	14.563	14.2991	14.3775	14.5344	14.7304	14.5895	14.6348	14.8668	14.2356	14.706	14.5712
Eps8l2	19.2176	19.1919	19.0476	19.0858	19.1516	19.4342	19.3531	19.3077	18.7038	19.1983	18.8585	18.8344	18.8546	18.7234	19.0133	18.987
Erap1	20.4512	20.3911	20.4871	20.5696	20.3866	20.3516	20.3591	20.3504	20.4425	20.3945	20.3991	20.4644	20.033	19.3149	20.1725	20.0865
Erbb2	14.0984	14.0894	14.3303	14.1966	14.1837	14.3743	14.6807	14.7833	14.8161	14.2486	14.453	14.6791	13.8637	15.9843	13.5107	14.8584
Erbin	17.5216	17.5312	17.5226	17.4355	17.4669	17.5477	17.6022	17.5355	17.5399	17.5591	17.4609	17.6591	17.6026	17.6173	17.6417	17.7578
Erc1	19.4567	19.5185	19.5383	19.4855	19.5666	19.3898	19.2911	19.4267	19.45	19.4773	19.4722	19.3622	19.1112	18.9891	19.2352	19.1255
Erc2	11.8123	11.8448	11.7789	11.9852	11.8692	12.293	13.7098	12.1326	12.0888	12.6378	12.0502	11.9047	12.0367	13.7463	11.8594	12.1552
Ercc1	14.7015	14.6774	14.7868	14.7009	14.6553	14.5814	14.8044	14.8109	14.6843	14.7536	14.7251	14.7046	14.6168	14.2071	14.5211	14.326
Ercc2	13.9954	13.6843	13.7423	13.6989	13.3606	14.0617	13.9196	13.9091	13.6714	13.4563	13.7239	13.6857	13.7107	14.368	13.5695	14.1231
Ercc3	13.6569	13.9092	13.8909	13.7548	13.6541	14.25	13.0259	13.648	13.9117	13.8234	13.8459	13.8814	14.1189	14.6593	13.9413	14.1533
Ercc4	13.7296	13.4716	13.5792	13.3642	13.2523	12.9348	13.8075	13.9442	13.6819	13.591	13.5312	13.5503	13.8356	13.8494	13.3595	13.6276
Erg	16.6397	16.3839	16.3032	16.1748	16.3726	16.2317	16.0959	16.1552	16.4193	16.506	16.3958	16.2966	15.8072	14.5729	15.9251	15.7718
Ergic1	16.6162	16.6684	16.7757	16.6977	16.4028	16.844	16.5031	16.5798	16.6161	16.8093	16.6607	16.6175	17.1469	16.9103	17.0272	17.3042
Ergic2	15.6503	15.4775	15.5469	15.4236	15.3584	15.5742	15.5885	15.6518	15.5284	15.4612	15.4874	15.3827	15.7372	15.2403	15.5731	15.5852
Ergic3	17.3307	17.1434	17.0445	17.0073	17.1063	17.433	17.2226	17.3419	17.1527	17.2208	16.9087	17.0986	17.3907	16.7825	17.3274	17.5982
Erh	18.6625	18.686	18.9398	18.6529	18.8823	18.2426	18.0749	18.2387	19.0367	18.953	18.8376	18.9989	18.3498	17.6891	18.1534	17.7607
Erlec1	15.3629	15.3313	15.2054	15.252	15.1886	15.6641	15.2709	15.5936	15.1825	15.317	15.1193	15.0746	15.8991	15.6412	15.5802	15.766
Erlin1	15.8653	15.8703	15.9316	15.8005	15.9656	15.5425	15.8146	15.9837	16.1018	15.6489	15.9469	16.0385	15.3849	15.9954	16.1375	15.7733
Erlin2	20.1876	20.1182	20.0684	20.0676	20.0886	20.4935	20.5725	20.5032	20.2279	20.1365	20.1089	20.2177	20.3295	19.9759	20.2545	20.4315
Ermn	15.4934	16.1362	16.8413	16.2911	16.7145	17.5924	17.4348	16.3701	15.6585	14.4011	16.9872	16.9382	16.7077	19.5105	16.6035	16.0983
Ermp1	15.9589	15.7863	15.7424	16.0145	15.9044	15.7813	15.4236	15.9443	15.9761	15.9721	16.1169	16.093	15.6372	15.5671	15.9916	15.8739
Ero1a	19.0447	19.1165	19.0815	19.1384	19.096	19.044	19.1027	19.1177	19.1676	19.0377	19.0345	19.0092	18.9126	18.5622	19.0856	19.1173
Erp29	18.3445	18.2868	18.3306	18.3139	18.2931	18.3832	18.2686	18.2647	18.3516	18.3911	18.295	18.3346	18.4568	18.1067	18.5679	18.6191
Erp44	19.5045	19.4387	19.3794	19.4972	19.4798	19.4944	19.3539	19.545	19.5752	19.4885	19.4237	19.4476	19.5007	19.103	19.4938	19.3971
Esam	19.2875	19.0456	19.0759	19.0951	19.2153	19.3763	19.0533	19.2169	19.2664	19.188	19.1661	19.1232	18.5351	17.6924	19.0296	18.8916
Esd	19.7845	19.8234	19.7883	19.7242	19.7962	19.8665	19.9588	19.853	19.8242	19.7547	19.6417	19.7238	19.7611	19.7899	19.8361	20.1491
Ester hydrolase C11orf54 homolog OS=Mus musculus OX=10090	17.6664	17.7086	17.8346	17.6282	17.7064	17.6624	18.2431	17.4417	17.582	17.6139	17.7371	17.7575	17.5464	17.812	17.6401	17.6846
Esyt1	21.0723	21.0297	20.9752	21.0747	21.0428	20.9418	20.5402	20.9283	21.0055	21.1373	20.9246	21.0154	20.7981	19.8919	20.9048	20.7776
Esyt2	21.274	21.2735	21.2787	21.2991	21.3819	21.4765	21.1779	21.4496	21.2333	21.342	21.1889	21.2269	20.9701	20.2774	21.1474	20.8976
Etf1	18.4603	18.4753	18.3334	18.5384	18.4276	18.2769	18.4719	18.4896	18.3162	18.3694	18.4142	18.3579	18.7806	18.907	18.7062	18.8224
Etfa	21.7964	21.827	21.748	21.7379	21.7441	21.745	22.4981	22.0518	21.5379	21.9258	21.7053	21.8108	21.8853	21.4999	21.9143	21.9612
Etfb	20.9154	20.8437	20.8641	20.7837	20.8674	21.1011	21.743	21.0746	20.6891	21.0687	20.8166	20.859	20.9209	20.637	21.0249	21.0151
Etfdh	20.9239	20.9628	20.9945	20.8957	20.8828	21.112	21.4982	21.1052	20.8682	21.0268	20.8911	20.9969	20.9941	20.7958	20.99	20.9741
Ethe1	17.5556	17.5229	17.7747	17.5974	17.6084	17.5306	17.7237	17.6079	17.6916	17.6948	17.5454	17.6313	17.586	17.8214	17.5355	17.7464
Eva1b	14.0029	13.7486	13.8064	13.2069	13.731	13.8032	12.79	13.1472	13.569	13.8337	13.8481	13.6296	13.9246	14.0032	13.8671	13.6123
Evc2	12.1706	12.3029	12.3876	12.2296	12.2463	12.4325	12.3893	12.3308	12.3864	12.1752	12.4143	12.2356	12.5014	12.6295	12.3742	12.7253
Evl	12.7798	12.7768	12.7947	12.6897	13.0016	12.8622	13.1786	12.5591	12.9466	12.7417	13.0778	12.8362	13.0933	12.8089	13.0989	13.1318
Ewsr1	19.2355	19.1682	19.0806	19.0005	19.2079	19.0425	18.9171	18.9418	19.2692	19.2585	19.1417	19.1745	19.1213	18.3782	19.0999	18.8366
Exd2	13.5561	13.5702	13.4816	13.5019	13.4503	13.1353	13.6759	13.5292	13.6471	13.7272	13.6661	13.6994	13.3772	13.607	13.5838	13.4485
Exoc1	18.7583	18.617	18.6266	18.7328	18.7239	18.8065	18.5821	18.7763	18.7996	18.6778	18.5815	18.8475	18.8319	18.6459	18.5761	18.5465
Exoc2	19.2309	19.151	19.232	19.2648	19.2727	19.0374	19.0723	19.2477	19.4064	19.1947	19.2683	19.2263	18.8355	18.6183	18.959	18.665
Exoc3	18.1774	17.9524	17.9102	17.7691	18.0552	18.2766	18.1698	18.1454	17.9749	18.1017	17.9027	17.9236	17.8057	17.7123	17.83	17.7389
Exoc4	18.9584	18.7989	18.9197	18.9151	18.9233	18.8306	18.5749	18.9074	19.0258	18.8882	18.8752	19.0207	18.6846	18.4884	18.6895	18.5825
Exoc5	19.8371	19.8147	19.8925	20.0463	19.9693	19.7338	19.6315	19.8801	20.0681	19.9026	19.875	19.9904	19.5734	19.2688	19.6211	19.6554
Exoc6	14.1276	14.4103	14.5285	14.3616	14.672	14.4362	14.5488	14.2243	14.6116	14.4244	14.6322	14.4742	14.5974	14.2	14.5415	14.1161
Exoc6b	18.8138	18.6224	18.8149	18.5955	18.7274	18.6265	18.607	18.5874	18.861	18.7232	18.7741	18.8085	18.4883	17.9036	18.5176	18.3572
Exoc7	19.3261	19.238	19.3457	19.3949	19.3767	19.2449	19.2295	19.4052	19.3535	19.2345	19.2226	19.2762	18.8151	18.3993	18.9934	18.8309
Exoc8	18.0424	18.0642	18.0263	17.9632	18.0735	18.035	17.937	17.9785	18.1694	18.0464	17.97	18.0592	17.7099	17.3342	17.746	17.7434
Exog	15.2732	15.2865	15.3119	15.337	15.3804	15.8945	15.6744	15.7723	15.2948	15.2538	15.5192	15.4338	15.6337	16.607	15.7871	15.9071
Exosc10	15.5411	15.4216	15.5004	15.5613	15.5283	15.1838	15.1904	15.2656	15.5986	15.6022	15.5576	15.5255	15.1238	15.3506	15.4724	15.076
Exosc2	14.7015	14.6407	14.734	14.8612	14.759	14.382	14.2761	14.799	14.7828	14.6862	14.6589	14.4997	14.5621	13.4166	14.8031	14.3816
Exosc3	15.6843	15.3921	15.3582	15.449	15.3276	15.6429	15.4409	15.7826	15.3945	15.5726	15.4066	15.5266	15.9188	15.646	15.7383	15.4381
Exosc5	14.493	14.5703	14.7081	14.6371	14.5866	14.6831	14.6255	14.1313	14.7352	14.6003	14.6948	14.7493	14.0138	14.4254	14.8605	14.1125
Exosc6	12.2645	12.2624	12.2608	12.0834	12.2052	12.5094	12.5032	12.4767	12.4618	12.2687	12.3641	12.247	12.4821	12.6343	12.1637	12.1713
Exosc7	14.9239	14.7484	14.8201	15.0749	14.7278	15.0076	14.6016	14.9475	14.9657	14.8937	14.7566	14.8724	14.3379	15.08	14.6524	14.993
Exosc8	15.426	15.2565	15.2662	15.153	15.0661	15.3882	15.1977	15.3306	15.3631	15.4596	15.2608	15.3774	15.5478	15.0638	15.3186	15.2064
Ezh1	13.2853	13.0865	13.1958	13.2006	12.9993	13.4481	13.4774	13.2787	13.286	13.403	13.0911	13.6178	13.1564	13.3696	13.372	13.1156
Ezr	18.7559	19.1732	18.9297	18.7896	18.7528	19.6862	20.1976	20.1217	18.7549	19.0005	18.8377	19.2264	19.0967	18.9969	18.7667	18.7867
F11r	19.0745	18.9945	19.0211	18.7521	19.06	19.0836	18.7481	18.9557	19.077	18.991	18.9249	19.0045	18.5764	17.5663	18.7709	18.759
F13a1	18.4402	18.8946	18.4735	18.467	18.6085	17.8068	17.6666	18.0791	18.5302	18.668	19.0031	18.7542	19.3302	18.1306	18.8574	19.3956
F2	13.3727	13.1211	13.3992	13.6367	13.5711	14.2391	14.2862	13.5423	13.689	13.6208	13.7007	13.4565	13.9241	14.0091	13.9406	13.7057
F8a1	13.4726	13.4477	13.7398	13.7233	13.7581	13.0655	13.2127	12.9691	13.9651	13.6186	13.9217	13.8541	14.0513	12.9419	13.4549	12.8669
Fabp1	17.1123	16.871	17.2364	17.0552	16.9819	14.9456	23.888	15.7062	16.0386	15.7555	16.4568	16.1683	15.8392	16.6862	15.9214	15.6664
Fabp3	16.7098	17.4423	17.2919	17.1579	17.1611	18.299	19.023	18.6292	16.562	16.4989	17.2109	17.5548	17.4068	18.4719	17.8539	17.896
Fabp4	14.1183	14.3489	14.041	14.3118	14.2404	15.4858	15.6221	14.6691	14.1215	14.4106	14.1516	14.0059	14.6268	14.7032	14.3809	14.4509
Fabp5	15.9565	16.1075	16.5776	16.4566	16.7074	17.3661	17.2814	16.7625	16.1013	15.6375	16.673	16.5094	17.0855	18.6146	16.9164	17.3334
Fabp7	12.3099	12.4292	12.4964	13.5072	12.5374	12.5323	12.8045	12.553	12.8549	12.1769	13.4687	12.7343	13.3813	13.5999	12.6841	13.0568
Fads2	13.6319	13.3992	13.1894	13.3494	12.93	13.0348	14.7407	13.7558	13.0445	13.6763	13.2743	13.442	13.5561	14.4265	13.8277	13.8095
Fads3	13.1647	12.9268	13.1581	12.9614	12.9486	13.0392	13.3396	13.1197	12.9207	12.8903	13.1274	13.0587	13.5381	13.2068	13.1164	13.2484
Faf1	15.3051	15.3458	15.3168	15.4089	15.3382	14.3939	15.0786	15.1032	15.4543	15.3943	15.3845	15.3001	14.676	14.5746	15.2071	15.1291
Faf2	15.623	15.5387	15.4698	15.3295	15.4427	15.3284	15.5522	15.2461	15.2679	15.5037	15.4076	15.5135	15.7594	15.4949	15.4643	15.334
Fah	17.9083	18.0385	18.0345	17.8344	18.0186	18.3804	19.643	17.8727	17.4532	17.701	17.8488	17.9523	17.9332	19.5418	18.0634	17.9744
Fahd1	17.9564	17.9117	17.8743	17.7464	17.9092	18.2309	18.4335	17.9495	17.7156	17.9635	17.8394	17.8752	18.4179	18.9248	18.332	18.2284
Fahd2	16.7065	16.592	16.6252	16.6937	16.4612	16.7051	16.4581	16.3959	16.4291	16.7979	16.6754	17.0184	17.095	17.5365	16.7959	16.8346
Faim	17.5572	17.4134	17.3289	17.6306	17.4931	17.5332	17.7597	17.5754	17.5695	17.3576	17.4028	17.377	17.0311	16.9932	17.2129	17.1781
Fam107a	12.3067	12.2256	12.3373	12.3335	12.3548	12.337	12.5823	12.5909	12.5666	12.3677	12.5511	12.3639	12.116	12.7646	12.1696	12.5362
Fam107b	15.2486	15.5332	15.3155	15.2516	15.2315	14.8499	13.9638	15.1334	14.8465	15.1252	15.1862	14.9753	15.4273	15.3661	15.1708	15.5154
Fam114a1	14.9438	14.75	14.4303	14.5945	14.3312	15.0383	15.2263	14.9896	14.3304	14.5639	14.5299	14.0116	14.6877	14.3927	14.6751	14.778
Fam114a2	16.2983	16.3898	16.4783	16.6089	16.4032	16.2947	16.1522	16.0047	16.4775	16.4154	16.5379	16.3835	16.2256	16.0967	16.1647	16.223
Fam118a	14.2424	14.5467	14.4795	14.4307	14.3661	13.6882	14.4192	14.5296	14.0767	14.4743	14.3782	14.2854	13.8229	14.9548	14.1483	14.3681
Fam118b	16.2413	16.3583	16.5259	16.4507	16.6711	16.4597	16.5548	16.1362	16.4871	16.1215	16.5988	16.5505	16.4509	17.5922	16.4638	16.3899
FAM120A	19.6847	19.709	19.7481	19.6864	19.751	19.7176	19.6963	19.8124	19.8041	19.7315	19.7876	19.824	19.7078	19.413	19.7394	19.6294
Fam120c	14.4646	14.5195	14.3217	14.6995	14.5486	14.104	14.2019	14.23	14.4182	14.6033	14.6683	14.7523	14.3703	14.2941	14.5997	13.6983
Fam126a	16.5394	16.3146	16.2555	16.3655	16.2814	16.8583	16.5089	16.3631	16.2694	16.5086	16.3281	16.5453	16.5841	16.7783	16.5376	16.4054
Fam126b	13.8923	14.059	14.1023	14.0779	14.2326	13.9585	14.236	13.786	13.959	13.7638	14.2821	14.1056	13.895	14.784	13.9299	14.1565
Fam133b	14.2823	14.1623	14.1506	14.2958	14.3681	14.15	13.7423	14.3547	14.5091	14.3562	14.3806	14.2327	14.0712	12.9747	13.9715	13.7958
Fam136a	15.6532	15.688	15.4658	15.3979	15.6843	15.9654	16.0826	15.7233	15.6509	15.6575	15.6786	15.8137	15.682	15.5268	15.7107	15.5848
Fam13c	12.7452	12.6175	13.0565	12.8719	13.0628	12.8885	12.9726	12.9929	13.1762	12.8909	13.0632	12.8483	12.428	12.9762	12.3816	12.4245
Fam160a2	13.0521	12.7146	12.5777	12.8778	12.5019	12.7027	12.9016	12.368	13.0344	12.8728	12.9916	12.7295	13.1928	13.954	12.8522	13.2083
Fam160b1	14.8128	14.8183	14.8633	14.8206	14.8646	14.5218	14.1323	14.7835	15.0693	14.7515	14.9342	14.9633	14.7601	14.7862	14.6915	14.61
Fam162a	18.3945	18.6488	18.6464	18.4635	18.6036	18.106	18.3703	18.4853	18.387	18.5538	18.4978	18.3702	18.8068	18.6236	18.7213	18.7428
Fam172a	14.5347	14.5322	14.5445	14.4988	14.4606	14.3059	14.2169	14.3237	14.5737	14.5154	14.7253	14.4373	14.9879	14.4731	14.4656	14.3231
Fam177a1	16.1643	16.3811	16.6528	16.5228	16.5615	16.6265	16.8398	16.1294	16.3469	16.4113	16.5401	16.4275	16.2575	17.7576	16.637	16.9477
Fam20b	12.0785	12.0659	11.9654	12.0934	12.112	12.3437	12.5032	12.1403	12.3267	12.094	12.2682	12.2528	12.0934	12.635	11.894	12.4317
Fam210a	12.5391	12.4395	12.4787	12.5731	12.5551	12.3129	12.4516	12.7255	12.6488	12.4144	12.6381	12.5039	12.5088	13.2937	12.7637	12.4257
Fam234a	16.5668	16.4081	16.421	16.2116	16.3479	16.4415	16.5461	16.2973	16.3487	16.3477	16.422	16.5095	16.7235	16.351	16.8187	16.8217
Fam32a	13.3156	13.7109	13.5071	13.4404	13.5994	13.4025	13.5302	13.4522	13.8396	13.7502	13.5612	13.534	13.6658	13.6236	13.5431	13.5998
Fam3a	15.3395	15.1804	15.4325	15.4004	15.4469	15.4359	15.6918	15.3933	15.5837	15.3996	15.5623	15.508	15.2021	14.6134	15.3722	15.2737
Fam3c	16.2073	16.1779	16.1868	16.3448	16.1794	16.0387	16.1125	16.0735	16.1894	16.2929	16.2683	16.1354	16.3851	16.1497	16.4253	16.3086
Fam49a	12.9027	12.9915	12.7113	12.7886	12.9178	12.8328	12.9085	12.5689	12.7825	12.815	13.0848	12.8338	14.019	14.5412	13.296	13.8309
Fam49b	17.4941	17.5233	17.6296	17.6291	17.7189	17.9314	17.6656	17.7971	17.5392	17.3192	18.0518	17.8051	18.3503	19.3935	18.275	18.428
Fam50a	16.6289	16.6154	16.402	16.6313	16.6636	16.6611	16.57	16.532	16.528	16.5353	16.7132	16.5379	16.429	16.3003	16.5464	16.5932
Fam76a	11.881	11.9885	12.0493	12.0961	12.134	12.2835	12.4436	12.1487	12.3044	12.1325	12.2896	11.8467	12.8476	12.8291	11.8824	12.0086
Fam76b	16.2283	16.225	16.2231	16.3276	16.2722	16.2073	15.4545	15.8563	16.3772	16.4826	16.2775	16.4823	15.9341	16.0206	16.343	16.097
Fam89b	12.0859	12.175	12.145	12.1445	11.9842	12.3957	12.4242	12.2633	12.4397	12.1758	12.1686	12.1346	12.1178	12.7402	11.9159	12.1549
Fam98a	14.8721	14.6223	14.7598	14.7708	14.7456	14.7669	13.7135	14.7295	14.9067	14.7149	14.6853	14.6181	14.6659	14.65	14.859	14.5024
Fam98b	17.0376	17.2323	17.1736	17.2967	17.1745	16.9447	16.1467	17.0796	17.2105	17.2131	17.2046	17.296	17.3782	17.3056	17.0856	16.9804
Farp1	17.8581	17.9712	17.9031	17.8836	17.7674	17.5089	17.4117	17.6817	17.7731	17.9169	17.849	17.7409	17.8266	17.7518	17.8954	17.8297
Farsa	18.5074	18.5633	18.5018	18.5506	18.5152	18.579	18.5232	18.6549	18.6648	18.536	18.5174	18.5936	18.5132	18.154	18.4828	18.4618
Farsb	18.4425	18.5661	18.4072	18.376	18.5659	18.7254	18.8708	18.6178	18.7761	18.5289	18.6927	18.6858	18.5119	18.0357	18.4609	18.4529
Fas	16.8998	16.697	16.8325	16.9301	16.8648	17.2503	16.9196	16.8859	17.0132	16.7871	16.9227	17.3121	17.2232	17.2244	16.8456	16.5238
Fasn	19.0734	19.142	19.3408	19.2655	19.2686	19.5512	21.8842	19.2375	18.8373	18.7822	19.4285	19.3771	19.8204	20.9062	19.6121	19.8186
Fau	19.3718	19.256	19.2661	19.2425	19.3512	19.0627	19.4323	19.3637	19.511	19.3603	19.3769	19.1995	18.9286	17.2014	19.1269	18.8048
Fbl	18.8887	18.6388	18.4266	18.7397	18.4646	18.09	18.4015	18.5655	18.7411	18.9262	18.6702	18.5551	18.5273	18.3673	18.5294	18.6235
Fblim1	17.0416	17.1588	17.1697	17.2546	17.1062	17.4449	17.0471	17.1899	16.8534	17.2244	16.9099	17.0465	17.2673	17.0692	16.9437	17.106
Fbll1	13.5436	13.4223	13.4738	13.505	13.3818	13.8683	13.3585	13.9342	13.8286	13.6867	13.4192	13.3964	13.7939	14.2954	13.7141	13.5949
Fbn1	11.8987	12.1445	12.015	12.0692	12.0444	12.3442	12.387	12.1589	12.2891	12.0654	12.2244	12.0407	14.0234	14.0242	13.6344	14.4098
Fbxl20	14.2831	14.2935	14.3037	14.3062	14.4049	14.6551	14.2308	14.308	14.482	14.4032	14.1933	14.4654	14.4944	14.6561	14.3278	14.4916
Fbxo2	13.8307	14.1386	14.3075	14.2774	14.3286	15.5596	15.7446	14.8809	13.7951	13.2865	14.3177	14.2644	15.6557	16.9619	15.2657	15.8508
Fbxo22	16.7939	16.9152	16.788	17.0027	16.9249	16.8711	16.3249	16.776	16.849	16.8574	16.8201	16.7794	16.9418	16.4445	16.7457	16.64
Fbxo3	16.3769	16.5475	16.5679	16.4533	16.3781	16.6081	16.5806	16.3987	16.4562	16.2026	16.4593	16.3509	16.1801	16.3082	16.1665	16.2625
Fbxo38	12.9932	13.0117	12.6979	12.9029	12.6911	13.0391	13.157	13.02	13.0168	12.9107	12.9302	12.8509	12.7021	13.3657	12.7983	12.9633
Fbxo6	13.8694	13.8042	14.1586	14.182	13.899	13.4824	13.9548	14.4331	14.194	13.98	13.9716	13.8283	13.1568	13.8405	14.1068	14.0016
Fbxo7	14.1392	13.8944	13.7361	13.7865	13.6692	14.2957	14.2132	13.9311	13.7756	13.9076	13.912	13.955	14.4139	14.6986	14.0176	14.1543
Fcgr2	16.683	16.9222	16.4896	16.5666	16.6143	15.4524	15.6334	15.9644	16.1876	16.3387	16.38	16.2189	17.3982	16.3103	16.9944	17.5187
Fcgrt	18.728	18.556	18.6681	18.539	18.8369	18.8217	18.6765	18.6927	18.9918	18.6923	18.5797	18.6531	18.1774	17.1036	18.5109	18.2854
Fcho2	18.9223	18.9956	18.9205	18.9763	19.0641	18.9667	18.8353	19.04	19.0708	19.0121	18.8905	18.9301	18.5072	17.952	18.6945	18.4342
Fchsd2	14.7131	14.6554	14.6066	14.6961	14.6969	15.0627	14.9793	14.4047	14.7167	14.7658	14.6604	14.8681	15.0121	15.608	14.9106	14.66
Fcsk	15.9362	16.0594	16.0031	16.0323	15.8759	15.5747	14.9904	15.7255	16.1034	15.9461	15.8719	15.9475	15.607	16.3887	15.9792	16.0474
Fdps	17.5587	17.9078	18.006	17.8338	18.0034	17.7628	18.3153	17.4975	17.6733	17.7614	18.05	17.9939	17.5198	17.8077	17.6082	17.5968
Fdxr	15.4349	14.9887	14.8904	14.6519	14.8413	15.2547	15.6108	15.1321	14.7292	15.1962	15.118	14.9679	15.4219	15.6633	15.418	15.4753
Fech	18.1044	18.0707	18.0816	18.0188	17.9337	18.1637	18.1344	18.1314	17.9221	18.1402	18.0704	18.0144	18.0129	18.4426	18.3129	18.3609
Fen1	16.6704	16.6336	16.5672	16.5929	16.5406	16.7542	16.2403	16.6005	16.7364	16.7762	16.8805	16.5493	16.6709	16.2751	16.5555	16.0921
Fer	15.8069	15.9601	15.8745	15.9169	16.0012	15.9659	16.2933	16.0122	15.9663	15.7256	15.6284	15.8764	15.4429	15.5458	15.8714	15.6429
Fermt2	22.0405	22.3529	22.2182	22.376	22.175	22.0158	21.6089	21.9916	22.163	22.1803	22.1588	22.2548	22.1967	21.9632	22.1183	21.955
Fermt3	18.4899	18.6979	18.5547	18.7769	18.6096	18.2971	18.3977	19.0515	18.8338	19.5496	18.593	19.0095	20.8926	19.606	21.1094	22.1835
Fez2	16.1462	16.0358	15.8855	16.0574	15.869	15.8823	15.6415	15.9701	15.9935	15.9534	15.9681	16.156	15.544	15.0266	15.9107	15.9665
Fga	18.5395	18.2664	18.4238	18.5596	18.3592	18.6392	19.0285	19.1428	18.3918	19.5549	18.1513	17.8653	24.2888	22.7091	20.8943	22.7886
Fgb	19.4795	19.2042	19.4364	19.5099	19.3342	19.7754	20.0422	19.911	19.4401	20.3369	19.2679	18.9446	26.0098	24.4209	22.1756	24.1202
Fgd5	18.4054	18.4106	18.4263	18.58	18.5417	18.547	18.0134	18.3825	18.5064	18.5825	18.4467	18.5856	18.4716	18.2849	18.4123	18.1348
Fgfr1op	14.084	13.7531	13.7161	13.6854	14.0203	14.2782	13.3998	13.384	14.085	13.987	13.9072	13.8494	14.4957	13.7647	13.6398	13.7694
Fgfr1op2	12.3797	12.2786	12.1178	12.2635	12.3101	12.4614	12.5951	12.3197	12.4929	12.2737	12.4178	12.4072	12.4242	12.7012	12.4405	12.5007
Fgg	18.6276	18.4238	18.7121	19.0125	18.7839	18.7613	18.8836	19.2198	18.8663	19.6915	18.554	18.3223	25.2243	23.697	21.4492	23.5497
Fh	21.2154	21.1875	21.1513	21.0871	21.1906	21.2188	21.4012	21.2389	20.9358	21.2555	21.1124	21.0979	21.319	21.8048	21.4377	21.4745
Fhl1	18.8271	18.946	18.6463	19.0853	18.7438	19.6389	19.5607	19.5456	18.362	19.1292	18.7864	18.6744	19.8326	20.0999	19.6958	20.1101
Fhl2	16.8627	17.052	17.0717	17.1106	16.9756	16.1591	16.3714	16.3967	16.629	16.6854	16.7719	16.7535	17.1084	16.2144	17.212	17.3988
Fhl3	16.5809	16.5571	16.6633	16.7121	16.5509	16.6312	15.7674	16.3444	16.4147	16.7454	16.4221	16.8857	17.3784	17.2569	16.8861	16.8353
Fhl5	17.1389	17.2505	17.0338	17.392	16.9239	16.6279	16.2031	17.0136	16.2822	17.0239	16.6912	16.5273	17.5777	17.1717	17.4113	17.5793
Fhod1	17.3279	17.1835	17.1609	17.1255	17.2964	17.3629	17.1051	17.3462	17.454	17.4174	17.177	17.2527	17.8869	17.0544	17.915	18.4151
Filip1	13.9066	14.1348	14.1953	14.1607	14.0092	14.3577	14.1791	14.0058	13.9169	14.0566	13.8317	13.962	13.6495	13.8034	13.7299	13.5103
Filip1l	15.2661	15.4746	15.1545	15.2693	15.4335	15.1271	15.0531	15.01	14.8263	15.2424	15.218	14.8327	15.3978	15.3559	15.5875	15.6172
Fip1l1	16.5185	16.0345	15.9117	15.7974	15.9148	16.5063	16.3408	15.9175	15.9025	16.2395	15.9458	15.9446	16.3578	16.1704	16.0057	15.9621
Fis1	18.4346	18.7311	18.9065	18.7036	18.8301	18.1198	18.5976	18.5656	18.7588	18.5833	18.7769	18.7	18.4411	18.4283	18.3627	18.3171
Fkbp10	15.4867	15.4913	15.4023	15.2611	15.3198	14.6578	15.0216	15.4011	15.5038	15.3878	15.4766	15.3501	15.7956	15.3134	15.682	16.0145
Fkbp15	17.2477	17.0808	17.0496	17.018	17.0366	16.9521	17.2129	17.2154	17.2949	17.1871	17.1519	17.0812	16.6946	16.0913	16.9695	16.8198
Fkbp1a	16.6592	16.6679	16.5807	16.6511	16.6711	16.6908	16.1341	16.7181	17.1185	16.6357	16.6388	16.5916	16.5399	17.0654	16.5542	16.7015
Fkbp2	17.8869	17.7266	17.6	17.6276	17.6376	17.8841	18.2237	18.1755	17.5825	17.8462	17.6811	17.6523	17.8806	18.1766	17.995	18.0194
Fkbp3	18.8392	18.8254	18.8403	18.7193	18.8197	18.9476	19.1362	18.9227	19.0122	18.8169	18.8977	18.7871	18.5904	18.6937	18.6461	18.5903
Fkbp4	20.3406	20.2882	20.2174	20.3132	20.2812	20.1233	20.2181	20.019	20.2242	20.3197	20.2913	20.3316	20.0186	19.8757	20.1029	19.8449
Fkbp5	16.172	16.1715	16.1572	16.2485	16.0022	15.8729	15.2493	16.2454	16.8715	16.14	16.2763	16.1016	15.9827	16.0102	16.3232	16.1749
Fkbp8	18.1488	18.2163	18.2275	18.3122	18.1719	18.2613	18.6137	18.3466	18.1706	18.2736	18.1804	18.2036	18.0682	17.9555	18.1913	18.0799
Fkbp9	18.524	18.3532	18.3232	18.2303	18.2783	18.4686	18.5158	18.4659	18.3213	18.5013	18.3729	18.2623	18.3657	17.6947	18.511	18.6615
Flad1	14.4545	14.6287	14.5068	14.4455	14.644	14.8396	14.9278	14.4921	14.484	14.4799	14.4843	14.7033	15.2832	15.5692	14.8614	15.087
Fli1	15.424	15.2597	15.3771	15.1414	15.2735	15.1839	15.0104	15.2487	15.4204	15.3573	15.3679	15.352	15.5518	14.9742	15.2855	15.0272
Flii	17.5301	17.5969	17.6538	17.6323	17.5641	17.5391	17.4683	17.5933	17.4231	17.4911	17.5422	17.4613	17.6835	17.2282	17.665	17.8615
Flna	24.4347	24.4987	24.2215	24.1363	24.2057	24.274	23.9505	24.2361	23.833	24.5319	24.0515	23.9141	24.9636	24.8357	25.0867	25.4574
Flnb	24.2116	23.951	23.9138	23.8294	24.029	24.3537	24.0645	24.0986	24.2131	24.1748	23.9306	23.972	23.7298	22.9089	23.8376	23.5867
Flot1	17.0648	17.0439	16.9782	16.882	16.772	17.1297	17.9009	17.1723	16.7034	16.9861	16.8843	16.7589	17.7169	18.0825	17.3766	17.8005
Flot2	17.6509	17.6902	17.7562	17.5684	17.5779	17.6139	17.6104	17.6	17.4463	17.7114	17.6067	17.5406	18.2331	18.6333	18.0904	18.2514
Flt1	19.8536	19.9263	20.0235	19.8862	19.9963	20.0291	19.7339	20.0274	20.0512	19.9927	20.0372	19.9725	19.4705	18.6429	19.6174	19.3734
Flt4	15.1727	14.8332	14.9499	14.952	14.8421	15.3529	15.1117	15.3823	15.2353	15.3493	15.2427	15.0677	14.2037	14.2569	14.6688	14.749
Fmnl1	12.8784	12.6964	12.5654	12.7489	12.7379	12.558	12.7334	12.227	13.0186	12.5622	13.0381	12.7944	12.9983	13.7496	13.2243	13.1723
Fmnl2	17.3778	17.2594	17.4575	17.5447	17.5388	17.4475	17.8892	17.6044	17.7776	17.145	17.429	17.4862	17.3983	17.9914	17.2722	17.3366
Fmnl3	20.1162	20.0353	20.104	20.0958	20.1939	20.0935	20.0948	20.338	20.1763	20.045	20.0766	20.1052	19.5921	18.9465	19.7318	19.6809
Fmo1	18.958	18.8379	18.8662	18.9497	18.982	18.6743	18.8732	18.5435	18.985	18.8614	18.8538	18.8876	18.6193	17.4708	18.7965	18.386
Fmo2	19.1088	18.6692	18.9711	18.9455	18.9507	18.9023	18.7253	18.955	19.263	18.7969	18.9296	18.9882	18.4232	17.7204	18.7901	18.5881
Fmo5	17.3136	17.3471	17.3471	17.4966	17.2841	17.5093	18.4568	17.3644	17.2464	17.4585	17.1701	17.3387	17.3209	16.9256	17.4676	17.3763
Fmr1	16.5993	16.5607	16.4598	16.4207	16.4198	16.1696	16.0344	16.5011	16.5642	16.6572	16.4835	16.3699	16.4648	15.9659	16.4241	16.4858
Fn1	18.4792	18.17	18.3237	18.4266	18.4013	18.7682	18.8736	18.7924	18.5232	18.4742	18.379	18.2713	18.5289	17.7679	18.7185	19.0089
Fn3k	14.3338	14.7424	14.7536	14.5643	14.909	14.6755	14.7841	15.2209	14.3263	14.4149	15.0405	14.8474	15.0105	15.9247	14.7351	14.8245
Fn3krp	17.5786	17.6039	17.5423	17.6936	17.756	17.3198	17.0828	17.6601	17.5404	17.495	17.5082	17.5855	17.5758	17.675	17.4665	17.7477
Fnbp1	14.6739	14.9909	14.9865	14.8991	14.9596	14.9005	14.674	14.6945	14.838	14.7358	15.1437	14.9927	15.2341	16.1936	15.3693	15.5913
Fnbp1l	19.6494	19.6111	19.6788	19.6259	19.697	19.5399	19.3126	19.3733	20.0252	19.598	19.724	19.642	18.8679	18.3026	19.2293	18.8117
Fndc3a	13.3686	13.651	13.4831	13.5091	13.305	13.5236	13.3152	13.0429	13.5557	13.5236	13.5369	13.7596	13.1335	12.9227	13.6481	12.7746
Fndc3b	13.0038	12.8392	12.9889	12.8316	12.9351	13.0279	13.1187	12.9503	13.0933	13.1109	13.1574	12.9062	13.2516	12.7717	12.8379	13.0689
Fnta	17.4705	17.3741	17.5217	17.6649	17.5653	17.4591	17.1619	17.5449	17.6525	17.2189	17.3649	17.4722	17.4302	17.1901	17.012	17.2356
Fntb	14.3467	14.5937	14.7044	14.8088	14.75	15.0561	14.821	14.7214	14.5558	14.5779	14.4956	14.4867	14.7045	15.3146	14.6699	14.5893
Folr1	17.2271	18.1355	17.5908	16.7594	16.9319	18.9908	20.1017	19.7713	17.0886	17.7721	17.1775	18.4198	17.1368	17.0325	16.8258	16.3581
Foxc1	15.7947	15.8567	16.0729	15.9173	15.8989	15.7571	15.5933	15.7049	16.0282	15.9755	15.941	16.0497	15.6472	14.8908	15.711	15.7771
Foxj3	15.272	15.4443	15.3652	15.4824	15.3353	15.5399	15.5328	15.5772	15.4376	15.3321	15.4473	15.3187	15.2043	15.4867	15.1853	15.361
Foxk1	14.0192	13.5011	13.4245	13.6101	13.4879	12.8906	13.7384	13.7216	13.5133	13.626	13.7607	13.5703	13.6725	13.8372	13.655	13.7099
Foxl2	14.3672	14.4218	14.541	14.6828	14.4841	14.404	14.4825	14.6445	14.7762	14.7745	14.4788	14.7035	14.0487	14.3787	14.1565	13.9575
Foxo1	12.8471	13.0399	12.9396	13.1368	13.1502	13.4779	13.4961	13.3394	13.5154	13.468	13.2568	13.0067	12.0351	13.0423	13.0805	12.326
Foxp1	15.3302	15.6611	15.9063	15.8392	15.6758	15.8437	15.8501	15.743	15.6982	16.058	15.7505	15.6811	14.9789	15.7376	15.3918	15.4424
Fpgt	13.9466	14.0954	14.115	13.9368	14.0201	14.0825	13.7504	14.085	13.8689	14.1668	14.082	14.1401	13.9922	14.0797	14.0407	14.0039
Frg1	17.3287	17.4689	17.2033	17.2249	17.2126	17.5067	17.3001	17.3493	17.304	17.3696	17.343	17.341	17.059	16.7326	17.2129	16.9755
Frmd8	16.7295	16.6391	16.8309	16.9452	16.7864	16.9216	16.717	16.8557	16.798	16.8962	16.8065	16.7801	16.5389	16.5308	16.7753	16.766
Fry	19.3111	19.2705	19.2471	19.2712	19.2511	19.071	18.9441	19.1185	19.3394	19.2648	19.1763	19.3076	19.2309	18.9279	19.3056	19.227
Fscn1	15.7429	15.9883	16.2457	15.9685	16.4639	17.0302	17.0277	16.861	16.3297	15.6707	17.0259	16.6944	17.0136	18.7826	17.0207	16.7642
Fth1	20.5834	20.4105	20.7016	20.6922	20.6675	20.6075	20.8781	20.7078	21.2161	19.9045	20.6308	20.2465	20.2396	21.5187	20.2183	20.0982
Ftl1	19.1365	19.3216	19.2879	19.3715	19.1919	18.1663	19.3215	18.695	19.4499	18.813	19.2239	18.7553	18.3981	17.694	18.5398	18.0783
Fto	15.5647	15.7322	15.7204	15.8356	15.6683	15.3764	15.5826	15.604	15.888	15.7538	15.8317	15.8183	15.7944	15.4677	15.3845	15.7833
Ftsj3	15.4586	15.3347	15.0424	15.2735	15.107	15.4738	16.3757	15.849	14.8373	15.1632	15.19	14.8801	15.4536	15.8824	15.3267	15.4351
Fubp1	18.8829	18.7267	18.72	18.591	18.7282	18.9703	18.8985	18.8157	18.9419	18.8446	18.8225	18.8191	18.386	17.6643	18.6358	18.3894
Fuca1	13.5405	13.5504	13.2633	13.5217	13.4572	13.9111	13.711	14.1032	13.1922	13.5525	13.6355	13.463	14.0304	14.3026	13.5982	13.9406
Fundc2	16.5934	16.5742	16.3559	16.4437	16.4247	16.7343	16.949	16.9312	16.0536	16.3522	16.3124	16.1331	16.771	17.1053	16.8559	17.1496
Fus	20.2182	20.1132	19.9883	20.0251	20.1274	20.2172	20.0966	20.1675	20.0091	20.2209	20.0657	19.989	19.8784	19.5141	20.0932	19.7996
Fut11	13.1604	12.7643	12.9242	12.6356	13.1877	12.788	12.7146	12.8171	13.0044	12.8919	13.146	12.893	12.3243	12.8115	12.9427	13.2018
Fut8	16.3896	16.2911	16.413	16.4852	16.4007	16.4365	16.5456	16.459	16.3223	16.448	16.3999	16.6662	16.0056	15.8875	16.3695	16.4634
Fxn	16.0541	15.9679	15.968	15.9085	15.8789	16.0261	16.075	15.9869	15.739	15.9648	15.8551	15.9243	16.2428	16.7782	16.1672	16.1702
Fxr1	18.6242	18.629	18.6096	18.631	18.5684	18.7306	18.7777	18.8562	18.5699	18.7246	18.5862	18.5988	18.3891	18.0972	18.5794	18.3837
Fxr2	15.5148	15.3392	15.4292	15.489	15.4047	15.5265	15.5206	15.4878	15.5942	15.5547	15.3292	15.3704	15.4455	14.5232	15.2595	15.0759
Fxyd5	14.5665	14.487	14.8372	14.1908	14.4995	14.7759	14.3718	14.663	14.7726	14.617	14.7847	14.5658	14.384	13.9099	14.5239	14.1215
Fxyd6	12.5618	12.6219	12.638	12.6634	12.8075	12.5656	13.0677	12.7638	12.4938	12.5198	13.0599	12.6155	13.1781	14.4952	13.147	12.8649
Fyb1	13.0386	13.3153	13.2593	13.3479	13.1629	13.1261	13.5093	13.5605	13.7069	14.0008	13.5525	13.4901	14.9401	14.2161	15.1261	16.0314
Fyco1	18.6443	18.5157	18.6078	18.6043	18.5602	18.6868	18.3939	18.6329	18.4628	18.5204	18.2982	18.5799	18.4255	18.0749	18.3519	18.2154
Fyn	13.1277	13.0503	13.1223	13.0859	13.079	13.0603	14.4721	13.4409	13.1611	13.0637	13.0797	13.2451	13.4967	14.2629	13.3223	13.613
Fzd6	12.4301	12.782	12.9619	12.9413	12.9428	12.8383	12.7368	12.4765	12.9589	12.7885	12.7915	12.939	11.9208	13.265	12.2742	12.3426
G3bp1	18.8182	18.7539	18.7023	18.6445	18.6479	18.1415	18.2559	18.7468	18.707	18.8256	18.7158	18.7744	18.4414	17.6357	18.6672	18.5223
G3bp2	17.5092	17.4701	17.3687	17.4607	17.4382	17.368	17.437	17.683	17.4817	17.5574	17.3992	17.5071	17.4947	17.4391	17.3668	17.3603
G6pc3	12.1988	12.3608	12.5919	12.1264	12.7371	12.6786	12.495	12.7952	12.4693	12.2199	12.5182	12.3351	13.5957	13.6349	12.4459	12.7804
G6pdx	18.9396	18.9446	18.9668	18.9501	19.0277	19.1977	19.0514	19.0947	19.0018	18.8873	19.0366	19.0049	19.2265	19.6042	19.1183	19.5766
Gaa	15.5819	15.7776	15.5817	15.3928	15.5186	15.8206	14.8594	15.919	15.4491	15.7105	15.3713	15.6631	15.9002	16.0206	15.7236	15.5341
Gab1	17.1827	17.3705	17.3884	17.2688	17.4361	16.9825	16.8577	16.8259	17.2229	17.1709	17.391	17.3131	16.7387	17.2248	16.967	16.7999
Gabarapl2	13.4752	13.4077	13.6978	13.7592	13.7101	13.5026	13.9088	13.5037	13.5061	13.564	13.6607	13.5176	13.5854	15.0177	13.8522	14.1186
Gabpa	16.9279	16.7832	16.7396	16.7461	16.6281	16.4762	17.3363	16.882	16.804	16.8752	16.7786	16.85	16.7108	15.7186	16.734	16.6056
Gabpb1	15.5581	15.3341	15.2306	15.2727	15.3845	15.8172	15.3531	15.5592	15.5283	15.4293	15.3383	15.348	14.9261	14.9539	15.1106	14.5866
Gadd45gip1	14.5119	14.5228	14.6452	14.8227	14.5453	14.5432	14.8638	14.7467	14.5991	14.6462	14.7349	14.6517	14.4721	14.6902	14.5225	14.535
Gak	17.926	17.9518	18.0129	17.9997	18.063	17.9808	18.0019	18.1201	18.0562	17.8884	17.9691	18.0165	18.1569	18.4279	18.0561	18.1839
Galc	15.5378	15.5667	15.5348	15.4742	15.6479	15.5877	14.6876	15.5937	15.4785	15.6086	15.6094	15.6099	15.4652	15.5729	15.4769	15.6613
Galk1	17.914	17.8872	17.6473	17.8017	17.8531	17.43	17.675	17.6591	17.7711	17.762	17.6614	17.6776	18.0785	17.7598	18.0075	17.8627
Galk2	16.2274	16.3554	16.1865	16.2603	16.2077	16.4164	16.4773	16.4562	16.3705	16.1949	16.2622	16.3645	16.0671	15.4516	16.1268	16.4078
Galm	16.453	16.8431	16.5906	16.4093	16.5861	17.2929	18.3346	17.3762	16.449	16.6318	16.454	16.9054	16.697	16.7964	16.6788	16.4685
Galns	15.7672	15.8535	15.6157	15.5444	15.6963	15.5846	15.499	15.2436	15.6352	15.6914	15.7147	15.628	15.7172	15.1078	15.4938	15.6126
Galnt1	14.5845	14.3712	14.2749	14.2629	14.2261	12.9469	14.2632	14.3056	14.485	14.5412	14.4192	13.9039	13.9785	14.559	14.252	14.4843
Galnt2	16.6469	16.7999	16.837	16.8382	16.6168	16.7678	17.1111	17.1213	16.6307	16.722	16.6792	16.6423	17.002	16.7946	17.0606	17.3578
Galnt7	14.094	13.7569	14.1496	14.1711	13.8785	14.1229	15.3106	14.3909	14.1407	13.913	13.9595	13.8741	14.0706	14.1145	13.9623	13.7976
Gamt	15.7937	15.7254	15.6049	15.4446	15.5581	15.4833	16.0352	15.2871	15.1915	15.7384	15.5224	15.5504	15.6814	16.5169	15.797	15.2433
Ganab	20.1147	20.1545	20.0613	20.1187	20.1109	19.9891	20.1948	20.2247	20.1277	20.1704	20.1571	20.1454	20.2351	19.8216	20.3006	20.2703
Ganc	17.2994	17.3638	17.1859	17.3105	17.2849	16.9117	16.4914	17.098	17.1277	17.2336	17.1959	17.1796	17.2712	16.8551	17.1838	16.9129
Gap43	15.875	16.943	17.2499	17.411	17.7509	17.8154	17.6798	16.7782	15.9711	14.8595	17.6138	16.6564	17.9427	20.1537	18.1068	18.3559
Gapdh	22.9674	22.9699	22.9583	22.8026	23.0263	23.3403	23.3937	23.1346	22.7976	22.7631	22.8989	22.8946	23.1343	23.9475	23.1491	23.3976
Gapvd1	17.7994	17.5803	17.6402	17.5672	17.6378	17.7346	17.7447	17.7587	17.5912	17.5433	17.6233	17.7744	17.5436	17.7747	17.6457	17.6219
Gar1	15.391	15.3652	15.3679	15.3432	15.2915	15.2796	15.2877	15.306	15.4096	15.5404	15.3272	15.183	14.6118	14.6864	15.425	15.1609
Gars1	18.676	18.7646	18.7781	18.8217	18.7833	18.9789	19.1258	18.8076	18.6416	18.6987	18.6847	18.7091	18.8767	19.018	18.7748	19.0128
Gart	18.3825	18.3725	18.3542	18.2517	18.3121	18.4391	18.3705	18.2112	18.2827	18.216	18.3434	18.2755	18.6077	18.858	18.4267	18.6104
Gas7	12.3847	12.8055	12.8471	12.5536	12.9968	13.1894	12.8232	13.3061	12.6368	12.4367	13.0871	12.9853	13.4	14.4882	13.2175	13.5784
Gatad2a	12.1356	12.0532	12.1311	12.1407	12.0195	12.3489	12.5992	12.2601	12.2789	12.2081	12.2737	12.1958	12.0903	12.6044	12.0035	12.1627
Gatad2b	15.3334	15.4885	15.2686	15.4953	15.3664	15.4474	14.9992	15.4974	15.2453	15.4897	15.3147	15.3865	15.623	15.945	15.4775	15.16
Gatd1	16.3794	16.1153	16.1925	16.2433	16.2758	16.1552	16.103	15.7176	16.3461	16.303	16.4587	16.3207	16.2292	16.6199	16.1669	16.4007
Gatd3a	20.6567	20.4958	20.5294	20.4174	20.5208	20.7227	20.6671	20.568	20.2567	20.7061	20.4678	20.5086	21.0274	21.3966	20.9815	21.0342
Gatm	21.452	21.3721	21.3832	21.3954	21.4251	20.969	20.5588	20.83	21.2705	21.23	21.2693	21.2661	21.0425	19.9582	21.4293	21.2926
Gba	17.5716	17.4697	17.5613	17.7162	17.6687	17.4238	17.4235	17.5147	17.6303	17.5946	17.62	17.517	17.4452	17.1748	17.4386	17.4869
Gba2	15.2962	15.6108	15.6463	15.7543	15.7022	15.7457	15.934	15.4616	15.5773	15.3533	15.7421	15.6363	15.9758	16.1722	15.3433	15.7555
Gbe1	19.3326	19.147	19.1289	19.1265	19.1879	19.2651	19.371	19.1441	19.2227	19.2673	19.1596	19.246	18.6097	18.0219	18.8934	18.6259
Gbp2	20.9201	20.6927	21.0425	20.6884	20.6366	20.6169	20.3437	20.3051	20.9188	20.6232	20.7355	20.9058	20.0493	20.007	20.1707	20.1213
Gbp4	18.8218	18.7155	19.0915	18.9282	18.8213	18.5831	18.6597	18.3272	18.8245	18.4996	18.7927	18.8628	18.2884	19.6446	18.2741	18.4545
Gbp5	19.3009	18.9654	19.4246	18.9528	18.8891	19.3614	19.6033	18.7785	18.9063	19.0959	18.9406	19.2896	18.3746	17.5959	18.6563	18.286
Gc	16.2531	16.117	16.3687	16.5131	16.412	16.7266	17.364	16.3466	16.349	16.2293	16.3505	16.2901	15.639	15.5958	16.0463	16.2121
Gcc2	15.9394	15.9855	15.8669	15.8456	15.8785	16.0442	16.4138	16.1733	15.9644	15.9575	15.9628	16.0922	15.2765	15.436	15.8262	15.7173
Gcdh	16.0587	16.2542	16.1652	16.1181	15.823	15.9383	17.4642	16.3673	15.9581	16.1511	16.0912	16.1031	16.0263	16.6368	16.2842	15.9411
Gclc	15.1314	15.2298	15.1261	15.4713	15.2221	15.1238	15.9724	15.1096	14.9983	15.0412	15.2121	15.395	15.2026	15.6835	15.2857	15.2484
Gclm	17.299	17.1845	17.256	17.3932	17.3563	17.316	17.1672	17.1965	17.1791	17.2137	17.2743	17.4372	17.1861	17.0928	17.3111	17.902
Gcn1	18.9878	18.9696	18.9344	19.0307	18.9755	18.864	19.0039	18.9649	19.0515	18.8779	18.9836	18.9322	18.8965	18.72	18.8382	18.8914
Gda	16.2568	16.4317	16.3959	16.561	16.4682	16.9707	16.9695	16.5375	16.3384	16.0565	16.3965	16.3864	16.649	18.524	16.6334	16.4811
Gdap1	12.3412	12.2711	12.2954	12.4853	12.5376	12.6946	13.0521	12.5079	12.6092	12.2451	12.6287	12.5235	13.8835	14.484	13.0233	13.9351
Gdap1l1	12.6132	12.0951	12.5442	12.8151	12.6114	12.8251	12.6443	12.4864	12.7226	12.695	12.6137	12.5229	13.1903	13.2618	12.8587	13.0566
Gdap2	14.0829	14.2775	14.7511	14.5574	14.5204	14.3422	14.1469	14.4122	14.7291	14.5687	14.8441	14.6102	13.9152	14.3928	13.8548	14.1185
Gde1	15.4018	15.4927	15.4182	15.4299	15.3684	15.6806	15.7877	16.1454	15.6853	15.6142	15.49	15.5629	15.8269	16.3295	15.6953	16.0235
Gdi1	20.9253	21.0019	21.0018	20.9367	21.1478	21.5291	21.4654	21.0639	20.6854	20.7847	20.9451	20.9497	21.2559	22.3352	21.246	21.4172
Gdi2	21.7088	21.8663	21.8384	21.8842	21.9393	21.9364	21.918	21.8736	21.7827	21.6918	21.7975	21.749	21.7958	22.2471	21.8186	21.8519
Gdpd1	15.0742	15.1264	15.114	15.1853	15.3007	15.1219	15.4304	15.3319	15.4669	15.2666	15.3855	15.3738	15.258	15.9983	15.3048	15.3428
Gdpgp1	13.7787	13.6507	13.6966	13.6825	13.8285	14.0259	13.9325	13.9812	13.8894	13.6695	13.7871	13.955	13.47	13.7003	13.6949	13.5519
Gfap	18.8315	18.4292	18.6618	19.3661	18.4107	19.613	19.3389	19.2203	18.8817	17.9673	18.7952	18.5701	21.0772	19.4527	19.0152	19.3365
Gfer	12.9731	12.791	12.6976	12.88	12.6301	12.5563	13.29	13.5194	12.8759	12.8481	12.7086	13.0868	13.4607	13.0148	12.5574	13.2964
Gfm1	17.2696	17.2175	17.3747	17.4349	17.4302	17.3822	17.7452	17.412	17.2495	17.368	17.3833	17.4076	17.3724	17.7053	17.4482	17.4339
Gfm2	14.5614	14.3319	14.3311	14.5751	14.6217	14.3999	14.918	14.9264	14.1573	14.5149	14.5392	14.3405	14.7413	15.4016	15.0713	14.9265
Gfod1	12.2795	12.1073	12.1328	12.3002	12.3586	12.4565	12.3935	12.2904	12.3403	12.2195	12.4098	12.3268	11.8925	12.6915	12.3105	12.1102
Gfpt1	15.5738	15.5934	15.8527	15.8299	15.6441	16.0179	15.6907	15.9656	15.6325	15.4544	15.7017	15.5863	15.9787	16.399	15.8375	16.0808
Gga1	17.0027	17.1381	17.2108	17.072	17.125	16.9334	16.9472	16.998	17.2161	17.0701	17.164	17.1601	16.7471	16.5488	16.9724	16.9034
Gga3	14.4337	14.7507	14.8229	14.8762	14.8638	14.5634	14.8982	14.8623	14.6549	14.5189	14.5892	14.6394	14.548	15.2939	14.7181	14.7544
Ggact	13.4748	13.7309	13.4652	13.6304	13.5965	13.5091	13.5286	13.1102	13.7055	13.699	13.5126	13.4995	14.1491	14.6764	13.8489	13.5977
Ggh	12.6601	12.5668	12.4278	12.5784	12.357	12.9323	12.7417	12.9651	12.6375	12.5161	12.8307	12.6782	12.8029	12.8667	12.5192	12.8375
Ggps1	17.1256	17.4091	17.4219	17.3748	17.3498	17.6068	17.0676	16.9053	17.3666	17.1758	17.3466	17.3713	17.4309	17.4997	17.257	17.4821
Ggt1	18.79	18.8765	18.8843	18.5724	18.8537	17.7338	17.6035	17.5556	18.7798	18.6582	18.7414	18.8288	18.8118	17.2635	19.1453	19.1622
Ggt5	18.6877	18.6854	18.7791	18.287	18.6782	17.3758	17.4271	17.5369	18.463	18.662	18.6099	18.5156	19.2062	18.305	19.2667	19.3353
Ghdc	14.2358	14.01	14.1569	14.2444	14.1755	14.01	14.1121	14.254	14.1393	14.2171	14.1895	14.4224	14.01	13.4538	14.1801	14.0761
Ghitm	16.4769	16.5044	16.5002	16.549	16.4236	16.4248	16.8939	16.7873	16.5244	16.5931	16.5752	16.5118	16.4262	16.431	16.4368	16.5186
Gid8	15.9894	16.0663	16.3127	16.1558	16.1827	15.672	15.363	15.8809	16.2013	16.0197	16.3173	16.1017	16.1388	15.9084	15.8581	16.0338
Gigyf1	15.6455	15.6142	15.764	15.3476	15.6299	16.0679	16.2454	15.5553	15.2352	15.6299	15.5814	15.5295	15.9322	15.8191	15.6329	15.5797
Gigyf2	12.2434	12.1349	12.1236	12.2511	12.1193	12.373	12.5179	12.3133	12.4764	12.1825	12.4396	12.2744	12.0934	12.7429	11.9136	12.0088
Gimap1	13.3421	13.2837	13.2575	13.1218	13.3209	13.6596	13.1029	13.3088	13.5296	13.3263	13.3874	13.2588	12.5833	12.7984	13.4315	12.4739
Gimap4	18.4289	18.1237	18.3367	18.5115	18.3287	18.4976	18.3348	18.765	18.8387	18.2711	18.2839	18.2976	18.2367	18.2206	18.1809	18.5229
Gimap5	17.39	17.0692	17.2229	17.3615	17.1183	17.4011	16.6445	17.4065	17.6925	17.2881	17.29	17.2692	16.6994	16.0555	16.7505	17.045
Gimap8	17.9094	17.9144	17.9245	18.1791	18.0086	17.963	17.7298	18.0824	18.2299	17.9164	17.9809	17.9965	17.4161	16.8634	17.5709	17.2681
Gipc1	15.5164	15.3301	15.473	15.2179	15.536	15.5059	15.5224	15.1652	15.3432	15.284	15.2506	15.2574	15.0715	15.0799	15.4273	15.7189
Gipc3	12.2636	12.3095	12.9977	12.3787	12.8513	12.7332	13.0132	12.5905	12.8482	12.6063	12.9276	12.9034	12.359	13.1668	12.5739	12.3203
Git1	17.579	17.5066	17.4419	17.4145	17.5959	17.1604	17.2532	17.1741	17.6249	17.5858	17.5527	17.5292	17.0458	16.7435	17.3822	16.973
Git2	17.0836	16.8502	16.8393	17.0118	16.9163	16.8398	16.4453	16.8871	17.0554	16.9461	17.0205	16.9294	16.8799	16.2968	16.8432	16.8877
Gja1	17.0563	16.7351	16.6166	16.8745	16.4466	16.8729	16.9128	16.6918	16.3028	16.8718	16.7861	16.7191	17.6752	18.4968	17.6308	17.6295
Gja4	16.5655	16.2338	16.0274	16.5325	16.0235	16.502	16.6689	16.382	15.8136	16.6005	16.1938	16.1354	16.1362	16.5809	16.0617	16.5355
Gjb1	12.0206	11.8966	12.1251	12.0618	12.1516	12.7745	12.9776	12.2939	12.1923	11.8544	12.3194	12.2229	12.0396	13.6646	12.1718	12.6072
Gjc3	13.1499	13.2726	13.714	13.4461	13.7228	14.3451	14.332	13.674	13.2698	12.6246	14.0639	13.9623	13.2573	15.9785	13.5721	13.2973
Gk	15.9774	15.9519	16.1303	16.2012	15.9341	15.8243	16.931	15.7633	15.7192	16.0785	16.2297	15.9175	16.5152	17.5822	16.3992	16.7846
Gkn3	12.1484	12.3472	11.9049	11.9431	11.879	12.5715	12.9047	12.3207	12.1423	11.997	12.1302	11.9263	12.3995	12.923	11.9979	12.4416
Gla	14.8096	14.8712	14.6339	14.8572	14.756	15.2315	15.2936	15.4183	14.7466	14.8086	14.9435	14.729	14.9481	15.4131	14.9628	14.9927
Glb1	18.6119	18.5414	18.4604	18.6212	18.5466	18.4352	18.5353	18.6225	18.5623	18.5164	18.5272	18.5635	18.3796	17.3906	18.2657	18.226
Glce	14.0482	13.8814	14.0026	14.233	14.0913	14.2084	13.965	13.6218	13.9908	14.0848	14.2187	13.7967	14.1195	14.0526	14.1537	14.1209
Glg1	19.6647	19.6044	19.6867	19.8591	19.6314	19.8765	19.7028	19.8803	19.8717	19.8657	19.6915	19.7955	19.8705	19.8381	19.8264	19.8269
Glipr2	15.0523	14.7483	14.8871	14.9646	14.8584	14.6734	14.9645	14.7246	14.905	15.0138	14.9492	14.7707	14.9333	15.3926	14.8532	15.7345
Glmn	12.765	12.6164	12.6781	12.8125	12.8758	13.137	12.9662	12.6294	12.8688	12.7925	12.9594	12.8741	12.7709	13.339	12.6334	12.8722
Glmp	14.192	13.9047	13.8858	13.9296	13.8854	13.4942	13.202	13.5602	14.0454	14.1187	13.9916	14.1239	14.2779	12.9659	13.9851	13.8876
Glo1	19.8414	19.9626	19.8432	19.9044	19.9545	19.8412	20.3272	19.8835	19.7462	19.8489	19.8693	19.93	19.9323	20.1535	19.7864	19.7251
Glod4	20.9308	20.8511	20.8306	20.7819	20.884	21.0753	21.0761	20.8385	20.6516	20.7842	20.7832	20.7846	21.0256	21.3681	20.8578	20.8496
Glrx	18.2053	18.3205	18.368	18.2057	18.4288	17.9893	18.2109	17.9223	18.448	18.0964	18.2259	18.3035	18.4165	18.748	18.2197	18.1355
Glrx2	14.071	13.6134	13.8472	14.1026	13.9668	14.0375	13.622	13.9807	14.0218	14.0679	14.066	14.1481	14.649	14.6437	13.8345	13.8531
Glrx3	18.1342	18.1093	18.1253	18.0665	18.2178	18.4816	18.6617	18.5428	18.1546	17.9236	18.1342	18.2073	18.0008	18.1395	18.0136	18.1499
Glrx5	15.8033	15.5441	15.7783	15.6434	15.7961	15.2659	14.0813	15.5356	15.88	15.7776	16.0283	15.9849	15.3304	16.5917	16.0122	15.9041
Gls	19.0594	19.0948	19.2717	19.2365	19.329	19.3395	19.3211	19.2781	19.2116	19.2015	19.3351	19.2976	19.4499	20.5005	19.3202	19.6105
Gltp	19.1453	19.6483	20.1835	19.729	19.9736	19.647	19.5089	19.3816	19.7493	19.1167	20.0887	19.8824	19.6643	20.9173	19.4337	19.4869
Glud1	22.2316	21.9962	21.9062	22.0283	21.9343	21.9773	22.2827	21.9358	21.6858	22.4332	21.9449	21.8465	22.2474	22.6824	22.2939	22.2767
Glul	18.9853	19.239	19.3829	19.2195	19.5673	20.1005	20.1291	19.5642	18.9592	18.7719	20.1344	19.8216	19.959	21.9326	20.0958	19.9857
Glyr1	17.7592	17.7912	17.6907	17.9447	17.8387	17.658	17.5844	17.7519	17.8446	18.0776	17.8057	17.8008	17.2556	17.103	17.6548	17.2761
Gm2a	16.5132	16.4902	16.132	16.1602	16.3239	16.6784	16.7632	16.297	16.2184	16.6978	16.3226	16.3012	16.8926	16.4726	16.366	16.4214
Gmds	18.2054	18.3304	18.2036	18.4115	18.2805	17.8975	17.7793	18.0851	18.2373	18.2325	18.1167	18.2416	18.2647	17.7526	18.0991	18.1862
Gmfb	17.6003	17.6368	17.7733	17.6748	17.8245	18.0397	17.8062	17.9168	17.7661	17.4877	17.7856	17.8067	17.7278	18.408	17.6477	17.7824
Gmppa	16.0281	16.1241	15.9846	16.1628	16.1647	15.4965	16.3479	16.0383	16.1599	15.9476	16.0828	16.1063	16.2328	16.6015	16.2853	16.1592
Gmppb	16.3692	16.2977	16.4373	16.3772	16.366	16.513	16.2206	16.1815	16.4178	16.1638	16.393	16.4197	16.3736	16.8393	16.5523	16.463
Gmpr	14.3432	14.3024	14.1321	14.697	14.3244	13.854	13.8982	14.386	14.9682	14.4048	14.4979	14.4563	14.9764	16.213	15.0768	15.3815
Gmpr2	16.7477	16.7193	16.6059	16.6744	16.6601	16.8942	16.4818	16.8982	16.8434	16.6831	16.6477	16.5852	16.8702	16.8646	16.6941	16.7862
Gmps	17.9291	17.912	17.8754	17.9095	17.9652	17.8227	18.0884	18.1437	18.012	17.7664	17.9409	17.9939	18.0258	18.0786	17.9549	18.075
Gna11	21.519	21.5126	21.5684	21.5757	21.6427	21.7187	21.7735	21.5617	21.4896	21.4911	21.5766	21.4488	21.4896	21.5695	21.3893	21.6565
Gna13	19.5514	19.583	19.655	19.5837	19.6789	19.4726	19.4922	19.4778	19.6521	19.5365	19.6515	19.5713	19.2863	19.5115	19.5474	19.6387
Gna14	13.1327	13.1328	13.1662	13.2121	12.9674	13.0002	13.3644	12.8299	13.4247	13.0255	12.9321	13.2208	13.063	13.2735	12.975	13.0517
Gnai1	14.804	15.2494	15.5215	15.3425	15.5612	15.9028	15.9122	15.2035	14.8167	14.5481	15.704	15.3927	15.8844	18.4419	15.6376	15.4862
Gnai2	22.5992	22.6656	22.6252	22.7703	22.7201	22.6646	22.4636	22.6844	22.7155	22.6759	22.6092	22.6348	22.6397	22.662	22.6303	22.5846
Gnai3	17.8272	17.911	17.8409	17.7582	17.9375	17.5664	17.5904	17.7354	17.6465	17.8141	17.7564	17.732	17.7962	17.5945	18.0168	17.8907
Gnao1	18.8517	19.211	19.6082	19.4677	19.815	20.3639	20.3628	19.665	18.7282	18.3845	19.7578	19.4051	20.2068	22.5463	20.0861	20.5232
Gnaq	19.3148	19.4401	19.5402	19.602	19.553	19.5204	19.3234	19.393	19.4941	19.3114	19.4666	19.4264	19.5366	20.1497	19.3932	19.5336
Gnas	18.9911	19.103	19.0105	19.1824	19.1757	19.1498	18.6663	19.0902	19.1242	18.9645	19.0048	19.1724	18.9958	18.6935	18.9606	18.9856
Gnaz	14.1094	14.3057	14.1613	14.2887	14.3558	14.2407	12.7848	14.5255	13.9426	14.1884	14.2904	14.1171	15.9468	16.8097	15.8861	16.5767
Gnb1	22.1784	22.1127	22.1092	22.1419	22.256	22.5579	22.3351	22.2724	22.1353	22.1888	22.1134	22.1374	22.2455	22.9948	22.3175	22.3878
Gnb2	20.8927	20.8327	21.0808	21.046	20.9602	20.963	20.9802	20.8371	21.0629	20.9322	21.0173	21.2136	21.0024	21.6292	20.9997	20.9272
Gnb4	18.2809	18.1826	18.4178	18.2883	18.2885	18.1716	17.9094	18.1148	18.3585	18.4092	18.365	18.5382	18.1067	18.4167	18.3242	18.3433
Gnb5	15.9205	16.284	16.1939	16.1821	16.2193	15.9527	15.9993	15.957	15.9603	16.1167	16.1586	16.0533	16.5771	17.6574	16.5447	16.5563
Gne	14.862	14.8563	15.1483	15.1711	15.1313	15.33	15.4487	14.5283	15.1792	15.0606	15.1076	15.0813	15.109	14.6901	14.945	15.2956
Gng11	15.4119	15.0319	15.5114	14.9376	15.2687	15.3328	14.7383	15.4165	15.0061	14.7223	14.8274	14.9732	15.7539	16.0486	14.781	14.1823
Gng12	15.9735	15.7146	16.5927	15.4153	15.9958	16.045	16.1404	15.7201	15.598	15.7481	15.666	15.936	16.3856	17.2694	16.1407	16.0495
Gng2	13.049	13.2944	13.1952	12.83	13.0599	12.9799	13.0471	12.7107	13.1563	13.2751	13.2326	13.2866	13.4882	14.546	13.537	13.8393
Gng5	16.7507	16.9751	17.4776	17.2293	17.2307	16.5488	16.683	16.9861	17.3093	16.9998	17.289	17.0758	16.5351	14.3817	16.6657	16.4595
Gnl1	15.7454	15.6044	15.7137	15.5538	15.6093	15.7018	15.4594	15.5748	15.5734	15.5839	15.601	15.7781	15.8202	15.9838	15.766	15.7591
Gnl3	15.1201	15.1845	14.9832	14.9231	14.9956	14.6473	14.7328	15.0903	15.2223	15.1742	15.1499	14.9644	14.7995	15.1906	15.0872	15.0048
Gnl3l	14.3722	14.1386	14.129	14.4838	14.3047	13.9217	13.7083	14.3564	14.3691	14.3395	14.21	14.104	13.7538	13.5866	14.0749	14.2143
Gnpat	15.8729	15.9483	15.8496	16.0582	15.8284	15.8745	15.7224	16.0725	16.0111	15.7786	15.8689	16.0696	16.1309	16.5276	15.9602	15.978
Gnpda1	16.5453	16.9396	16.8136	16.8734	16.7158	16.7684	16.7137	16.7802	16.5925	16.6001	16.9245	16.8136	16.9293	17.1822	17.0129	16.9892
Gnpda2	17.7538	17.7688	17.7398	17.6624	17.73	17.9109	17.9176	17.7229	17.563	17.7175	17.659	17.7231	17.8487	18.0111	17.7788	17.682
Gns	17.4308	17.4921	17.447	17.3186	17.3535	17.2711	16.7891	17.3226	17.3107	17.3428	17.4202	17.4527	17.2228	16.9953	17.3086	17.3079
Golga2	16.5299	16.3049	16.3255	16.3597	16.2576	16.4128	16.5914	16.389	16.1675	16.5245	16.1735	16.2437	16.2731	15.7335	16.1891	16.3061
Golga3	17.3602	17.3267	17.2881	17.288	17.3079	17.3927	17.1195	17.2901	17.1718	17.3064	17.236	17.3828	17.4934	17.5147	17.2427	17.295
Golga4	16.6276	16.7459	16.7791	16.5992	16.5585	16.9715	17.0445	16.9237	16.66	16.6821	16.7395	16.7344	16.8067	17.0663	16.5209	16.7148
Golga5	14.9836	15.2172	15.2018	15.1064	14.9917	14.8138	14.7015	15.1432	14.9832	15.303	14.9567	15.0285	14.664	15.3434	15.0987	14.7053
Golga7	14.6657	14.7458	14.6923	14.7288	14.7144	14.9881	14.7551	14.8752	14.7054	14.4433	14.8344	14.8201	14.7015	15.7407	14.9179	14.9644
Golim4	18.2996	18.3691	18.3553	18.4347	18.3371	18.5109	18.3877	18.6001	18.4946	18.3482	18.3453	18.2906	17.9547	17.6285	18.244	18.0948
Golm1	16.11	15.8803	15.8989	15.895	15.8075	16.1998	15.5664	15.7779	15.8399	15.7273	15.9877	15.7584	15.6331	15.771	15.8245	15.938
Golph3	14.3267	14.5115	14.6265	14.1639	14.4506	14.5187	14.627	14.6738	14.8544	14.3438	14.4177	14.5177	14.559	14.1169	14.3925	14.5472
Golph3l	14.036	14.2802	14.601	14.4216	14.3373	14.2838	14.32	14.1702	14.2905	14.4603	14.4941	14.4155	14.2724	14.1729	14.3155	14.0963
Golt1b	13.6783	13.6895	13.4389	13.7892	13.5154	13.1087	13.5875	13.5387	13.7222	13.7276	13.6428	13.6304	13.8462	13.5925	13.8689	13.8444
Gopc	14.7502	14.695	14.6662	14.5212	14.4983	14.5811	14.6479	14.5551	14.5062	14.23	14.639	14.6019	14.4291	12.8007	14.4884	14.1534
Gorasp1	12.2645	12.0829	12.1736	12.2329	12.1197	12.2733	12.529	12.276	12.3886	12.1474	12.3057	12.3671	12.062	12.8642	11.9603	12.1427
Gorasp2	16.7052	16.7208	16.9792	16.7658	16.7314	16.6833	16.8408	16.6356	16.8412	16.7898	16.7486	16.7525	16.6908	16.7321	16.711	16.739
Gosr1	14.7746	14.4598	14.3009	14.5934	14.2282	15.2327	14.5454	15.4713	14.3871	14.5105	14.2067	14.402	14.905	15.1493	14.9166	14.983
Gosr2	18.2227	18.0389	18.0966	18.1499	18.1982	18.1266	18.3325	18.1204	18.1623	18.1011	17.9922	18.0185	17.6582	17.2493	17.9039	17.7401
Got1	19.7331	20.0114	20.3334	20.0301	20.4017	21.0988	21.2671	20.6839	19.6504	19.1396	20.2764	20.3177	20.6419	22.2604	20.6857	21.226
Got2	21.8188	21.9429	22.0292	21.9586	22.0413	22.3208	22.6037	22.2958	21.8078	21.773	21.9864	21.8946	22.0705	23.0849	22.1355	22.325
Gp1bb	12.6727	12.6841	13.1109	12.9261	13.0055	12.6172	13.1425	13.3519	13.3248	13.7609	12.8049	13.1962	15.3542	14.0211	14.9991	16.2403
Gpatch11	13.2438	13.5713	13.2463	13.3018	13.4888	13.1755	13.0235	13.8379	13.4891	13.3974	13.2904	13.4458	13.6124	13.6864	13.7193	13.0137
Gpc1	12.2589	12.4086	12.3793	12.1563	12.3975	12.2482	12.5837	12.3303	12.5158	12.3239	12.5144	12.4014	12.9475	13.3386	12.6734	12.7269
Gpc4	12.1986	12.2625	12.2604	12.2046	12.2121	12.4369	12.4679	12.2031	12.4896	12.1324	12.3693	12.3216	13.2219	13.352	12.9124	13.3669
Gpcpd1	18.6502	18.6659	18.6497	18.7475	18.8293	18.5307	18.463	18.4716	18.7886	18.4924	18.648	18.6312	17.7928	17.5009	18.2161	18.0399
Gpd1	16.2621	16.6976	16.8921	16.7757	16.9405	17.4156	19.0047	17.2731	16.4077	16.1378	17.2014	16.9113	17.9646	19.3192	17.5356	18.1296
Gpd1l	18.4647	18.5311	18.6906	18.6751	18.673	18.7261	19.5677	18.3331	18.4496	18.383	18.6635	18.6665	18.7495	19.5644	18.7083	18.7866
Gpd2	23.1099	23.0902	23.1625	23.1478	23.2258	23.1178	22.9353	23.0975	23.15	23.2975	23.1644	23.1963	22.8551	22.2335	23.0082	22.8203
Gphn	12.9411	12.7512	12.7802	12.1314	12.5628	12.679	13.8364	12.5494	12.6594	12.731	12.9277	13.0313	12.5221	13.809	12.9869	12.9231
Gpi	22.3278	22.5283	22.4007	22.424	22.493	22.455	22.5693	22.4469	22.289	22.2755	22.3116	22.2823	22.305	22.8285	22.3186	22.409
Gpld1	16.8553	16.7454	16.6697	16.6773	16.7095	16.5707	16.4289	16.8084	16.8517	16.8183	16.8085	16.8527	16.8257	16.0523	16.5489	16.5177
Gpm6a	16.93	17.2217	17.2104	17.3713	17.5584	18.2563	18.6178	18.377	16.7316	16.8158	17.6029	17.3918	18.4042	20.0319	17.8635	18.6404
Gpm6b	15.7461	15.6175	16.0049	15.9746	15.92	16.4525	16.2616	15.881	15.5693	15.0563	16.3314	16.1573	17.1	18.6951	16.6884	17.002
Gpr107	16.2639	16.2534	16.1168	16.2663	16.2485	16.1808	15.0356	16.3049	16.383	16.3588	16.2804	16.3151	16.4205	15.6666	16.372	16.1866
Gpr108	12.7374	12.8836	12.945	13.0078	12.5842	13.1198	13.3136	12.9688	13.0516	12.8033	12.9256	13.0223	13.3039	13.5599	12.9422	12.9616
Gpr89a	14.572	14.819	14.8211	14.8661	14.4629	14.6421	14.0424	14.8503	14.7534	14.7293	14.6072	14.9538	14.7171	15.0899	14.572	14.8783
Gprasp2	11.7969	12.6829	13.0803	12.2054	11.8441	12.3282	12.6563	12.7493	12.0711	11.7918	12.0574	11.8415	13.5043	13.1262	12.5837	12.1274
Gprc5b	12.9055	12.7762	12.8331	12.542	12.8297	13.6868	13.4241	12.9067	12.7189	12.7244	13.1053	12.8791	13.5026	15.0032	13.1172	13.3538
Gps1	16.3316	16.554	16.5767	16.6678	16.6257	16.4612	16.4296	16.7048	16.7089	16.3467	16.5513	16.4283	16.7619	16.9258	16.4466	16.7141
Gpsm1	12.1391	12.1082	12.1235	12.1098	12.1713	12.4037	12.4087	12.2558	12.234	12.1842	12.3823	12.0033	12.0094	13.453	12.3126	12.3724
Gpx1	20.3846	20.2839	20.2071	20.1586	20.2531	20.0247	20.3229	20.0837	20.297	20.3726	20.296	20.1359	19.9417	19.6103	19.9882	19.9985
Gpx4	19.5412	19.6155	19.6749	19.6791	19.6445	20.0775	20.1517	19.8265	19.5463	19.4389	19.5612	19.5608	20.0173	20.5083	19.7626	20.2354
Gpx7	16.4375	16.2862	16.3903	16.2008	16.3692	16.4395	16.3575	16.332	16.4544	16.4074	16.3652	16.3781	16.3787	15.9309	16.3978	16.3062
Gramd4	12.8356	12.56	12.4491	12.8344	12.5775	12.578	12.6908	13.0515	12.8379	12.6035	12.7077	12.7686	12.8932	13.8496	12.7335	13.0871
Grap	16.1235	15.8935	16.1932	16.3162	16.2016	15.6013	15.1666	15.7718	16.1906	15.8476	16.0937	16.2502	15.3623	14.7632	15.7726	14.8263
Grb10	14.4617	14.3467	14.5059	14.3488	14.5426	14.4047	13.9776	13.5996	14.5852	14.2971	14.662	14.8239	13.3029	13.9626	13.7812	14.1812
Grb14	14.5513	14.3502	14.4899	14.3343	14.3201	14.6163	14.5397	14.3947	14.544	14.3579	14.4583	14.7138	14.242	13.8923	14.5063	14.0942
Grb2	18.8436	18.8316	18.936	18.8425	18.9806	18.9961	18.9032	18.8353	18.9781	18.8256	18.9565	18.8939	18.713	18.9572	18.8655	19.0666
Grcc10	14.8319	15.1529	15.5274	15.4321	15.417	14.1822	14.5806	14.6289	15.3559	14.8531	15.3427	15.2623	14.2666	13.9246	14.6642	14.728
Grhpr	17.5569	17.5401	17.6447	17.5543	17.5671	17.737	18.0434	17.3157	17.2322	17.3543	17.5568	17.5976	17.1971	18.1232	17.4639	17.268
Gripap1	17.5833	17.4984	17.612	17.5469	17.5451	17.67	17.7288	17.6895	17.75	17.628	17.5709	17.7404	17.2345	16.5902	17.3207	17.2286
Grk2	15.853	15.9979	16.0338	15.9825	16.0826	15.8527	16.0576	15.9377	15.9279	15.9382	16.0025	15.9572	16.0866	16.0832	15.9404	16.3501
Grk5	13.7867	13.7221	13.6023	13.636	13.4846	13.1781	14.6531	13.6354	13.7547	13.6166	13.5504	13.6506	14.0747	13.8431	13.6612	13.8698
Grk6	15.2775	15.2791	15.324	15.4848	15.4614	14.8098	15.2395	15.1147	15.3885	15.2228	15.3712	15.4268	14.9661	15.0961	15.486	15.2983
Grm3	14.3114	14.1892	14.3155	14.2572	14.0159	13.8209	13.7178	13.4017	14.0902	14.0016	14.3989	14.3969	15.2229	15.8873	15.5424	15.3025
Grn	19.1514	18.7174	18.9323	19.0546	18.7183	17.322	17.302	18.0205	19.1787	18.4952	18.8261	18.9069	18.4575	16.9765	18.4867	18.4818
Grpel1	17.5881	17.5979	17.5261	17.4954	17.5898	17.7235	17.9028	17.6175	17.6	17.4802	17.6105	17.5448	17.5168	17.4581	17.7351	17.514
Grsf1	13.4228	13.3653	13.3094	13.5766	13.311	13.086	13.1562	13.7758	13.6383	13.1664	13.1913	13.663	13.5408	12.909	13.4093	12.9326
Grwd1	14.3491	14.236	14.2136	14.0921	14.2099	14.6735	14.0006	14.1139	14.299	14.3339	14.4123	14.3654	14.5194	14.4428	13.9965	13.7245
Gsdmdc1	16.6536	16.5153	16.5447	16.5778	16.5607	16.5483	16.8348	16.4313	16.582	16.5974	16.375	16.3478	16.7108	16.2881	16.4683	16.6469
Gsk3a	13.4367	13.3742	13.3313	13.2122	13.3993	13.4947	13.3181	13.3886	13.3649	13.2644	13.5451	13.394	13.578	14.2104	13.4657	13.3796
Gsk3b	18.4316	18.4102	18.3629	18.521	18.3504	18.542	18.1001	18.4589	18.2978	18.3516	18.3283	18.4305	18.6505	19.0564	18.5345	18.7183
Gsn	20.7314	20.963	20.5883	20.4708	20.6149	20.7536	20.7674	20.8268	19.8764	20.8246	20.286	20.2534	21.3718	21.6883	21.4813	21.8384
Gspt1	18.5756	18.6729	18.6468	18.7121	18.7643	18.609	18.8333	18.8045	18.5745	18.5404	18.6238	18.5061	18.5993	18.5925	18.6478	18.8991
Gsr	19.6798	19.6335	19.5841	19.5883	19.5897	19.5903	19.5502	19.4993	19.6366	19.6103	19.5724	19.5844	19.3348	19.3194	19.4023	19.4528
Gss	16.5378	16.6608	16.563	16.6114	16.7462	16.5654	16.7115	16.5356	16.6623	16.2751	16.7101	16.689	16.3591	16.9423	16.1919	16.4577
Gsta3	12.7467	12.6782	13.0453	12.9078	12.9458	13.1014	18.1365	12.569	12.2808	12.5032	12.6361	12.6534	12.4463	13.2136	12.3491	12.5626
Gsta4	19.5181	19.7106	19.6492	19.6674	19.69	19.8247	20.1736	19.9537	19.5239	19.4395	19.6233	19.7585	19.5203	19.9058	19.273	19.3651
Gstk1	18.8754	18.7929	18.9359	18.814	18.7952	18.4083	18.9834	18.5989	18.872	18.8336	18.8059	18.8093	18.5453	18.3715	18.5781	18.4659
Gstm1	21.2477	21.3811	21.252	21.3579	21.4188	20.949	21.432	21.0643	21.2092	21.2169	21.2946	21.3396	21.2206	21.0751	21.066	20.9885
Gstm2	20.53	20.6664	20.5677	20.71	20.8271	20.0707	20.7605	20.264	20.609	20.4271	20.5921	20.5836	20.1485	20.0078	20.2495	19.965
Gstm5	18.5257	18.6853	18.5215	18.7689	18.5931	19.0545	19.0776	19.0851	18.4048	18.363	18.7035	18.7404	18.9361	19.8608	18.8308	18.8377
Gstm7	18.8819	18.9344	18.9764	19.0723	19.2181	18.8833	18.9719	18.8781	18.8788	18.8231	19.0177	19.0505	18.4526	18.639	18.4675	18.1551
Gstp1	19.7097	19.7879	19.6097	19.552	19.6838	19.8767	20.473	19.6472	19.3025	19.5133	19.5743	19.4993	19.8922	20.8928	19.7569	19.6343
Gstt1	18.7623	18.8006	18.9444	18.6957	18.7282	18.5316	19.2585	18.3513	18.5078	18.6054	18.6312	18.7146	18.8271	18.6533	18.6169	18.659
Gstt2	17.7412	17.6994	17.8019	17.7322	17.9437	17.4173	17.8393	17.4507	17.8102	17.679	17.7515	17.6714	17.3731	16.0073	17.4402	17.3225
Gstt3	15.853	15.8847	15.8322	15.7893	15.9544	15.96	15.9727	15.4617	15.8462	15.4047	15.7819	15.7404	15.5209	15.4501	15.3555	15.5069
Gstz1	16.9653	16.9982	17.0909	17.0275	17.0634	17.2198	18.8705	16.8978	17.0339	16.988	17.1497	17.207	16.9031	17.6218	17.0519	17.0256
Gtf2a1	13.4515	13.1054	13.1323	13.1048	13.2003	12.6143	13.0763	12.7388	13.4666	13.1686	13.1125	13.2248	13.2937	12.854	13.2668	13.0271
Gtf2b	14.3509	14.2535	14.4131	14.4986	14.2505	14.1296	13.1796	13.9292	14.6258	14.5087	14.4624	14.4068	14.488	13.4519	14.1927	14.0229
Gtf2e1	14.1793	13.8957	13.8112	13.7946	13.9007	13.9683	14.066	13.9416	13.8638	14.0755	14.0503	13.8614	13.9359	12.8644	13.838	13.8838
Gtf2e2	13.6027	13.525	13.3554	13.7135	13.6454	13.6159	13.3851	13.6524	13.8352	13.5203	13.547	13.6063	13.6374	13.9899	13.4806	12.483
Gtf2f1	11.7937	11.813	11.7433	12.2135	11.8201	12.7729	12.8278	12.348	12.0417	11.9753	12.0332	12.7928	13.2606	13.2154	11.9282	12.0713
Gtf2f2	15.5312	15.4665	15.4567	15.341	15.4448	15.5839	15.4667	15.4265	15.6254	15.3852	15.4488	15.4807	15.0778	15.2274	15.2382	15.1994
Gtf2h1	13.5268	13.3674	13.441	13.6088	13.4522	13.4509	13.8552	13.7109	13.5308	13.679	13.4619	13.4165	13.6509	14.2475	13.4337	13.4302
Gtf2i	20.148	20.1146	20.0168	19.9675	20.0198	20.092	19.7652	20.168	20.1586	20.2014	20.0263	20.1468	19.7389	19.5501	19.9454	19.6767
Gtf3c1	17.0585	16.9336	16.9929	17.0723	16.903	16.7882	16.8127	17.0803	16.9868	17.0673	16.8907	17.0788	16.9036	16.923	16.9512	17.0595
Gtf3c2	15.9515	15.7275	15.6888	15.9209	15.6653	16.0365	15.8482	15.9603	15.675	15.8714	15.7413	15.6656	15.7682	15.1066	15.6525	15.6555
Gtf3c4	13.7061	14.0073	13.9436	13.7911	13.7593	14.0005	14.3377	13.7954	13.9359	13.8401	13.9779	13.6378	13.853	14.3519	13.7391	13.4457
Gtf3c5	15.5747	15.1978	15.3566	15.247	15.2136	15.3693	15.0902	15.211	15.2933	15.4205	15.4385	15.4286	14.7426	15.0099	15.2637	15.2113
Gtpbp1	15.4325	15.2767	15.2345	15.2871	15.3213	15.3125	15.9424	15.3763	15.352	15.2925	15.2624	15.3067	15.4304	15.4599	15.4143	15.3498
Gtpbp3	12.626	12.5425	12.7045	12.5841	12.7066	12.7741	12.8753	12.8865	12.8075	12.6773	12.7615	12.6532	12.6609	12.7617	12.6011	12.7425
Gtpbp4	16.9975	16.9886	16.9468	17.1151	16.9195	16.7002	16.9063	17.0377	17.1495	17.0366	17.0262	16.9368	16.725	16.3424	16.8994	16.634
Gucy1a1	18.87	19.0346	18.7121	18.8063	18.6477	18.1144	17.5294	18.2423	18.135	18.8131	18.5147	18.4087	19.1405	18.8281	19.244	19.38
Gucy1b1	19.4478	19.7644	19.5601	19.5153	19.4621	18.7211	18.2301	18.8503	19.1054	19.5018	19.4059	19.2484	19.7547	19.5833	19.6485	19.7621
Guk1	14.942	14.9233	14.8297	15.0141	14.9173	15.3128	14.5261	15.1705	14.6903	14.8106	14.9656	14.8677	15.3711	15.8676	15.1305	15.2145
Gulp1	17.7518	17.9484	17.8244	17.8556	17.8861	18.11	18.0431	17.8401	17.4281	17.6905	17.4135	17.4088	17.0914	16.687	17.3924	16.9779
Gusb	16.9551	16.9474	16.7681	16.7512	16.7822	16.6538	16.407	16.8672	17.1266	16.8382	16.7991	16.8401	16.8822	16.3562	16.8561	16.8911
Gvin1	20.7152	20.516	21.1664	20.8312	20.4987	20.5708	20.3543	19.9928	20.3563	20.5509	20.7324	21.1054	19.5801	19.297	19.87	19.5201
Gyg1	15.4599	15.7816	15.795	15.4957	15.781	15.8004	15.289	15.5225	15.5982	15.6004	15.6664	15.6137	15.8286	15.927	15.6747	15.7529
Gypc	15.965	16.1647	16.0734	15.9324	16.1385	15.2817	15.0478	14.8983	15.7713	15.8501	16.0361	15.84	16.0285	15.7885	16.0146	16.0619
Gys1	12.7464	13.1939	13.0789	13.0045	12.9179	12.6226	12.8686	13.1668	13.0618	12.7735	13.1164	12.9351	13.0349	13.0814	13.02	13.171
H-2 class I histocompatibility antigen, alpha chain (Fragment) OS=Mus musculus OX=10090	13.3739	13.2105	13.3202	13.0557	12.9439	13.5629	13.419	13.0956	12.9046	13.2127	13.1056	13.3426	13.286	13.5596	13.4038	13.0302
H1-0	23.8367	23.7807	23.9091	23.7673	23.9982	23.8213	23.7009	23.6956	23.9759	24.1985	23.9864	23.8809	23.4951	22.584	23.7261	23.2976
H1-1	20.1098	19.9369	19.9492	19.9446	19.8838	19.3935	19.4967	19.6393	19.7726	20.007	19.9514	19.7294	19.3339	18.9388	19.7932	19.5693
H1-2	19.6477	19.8005	19.8719	19.8349	19.8704	19.3906	19.4812	19.516	19.7009	19.6996	19.6772	19.6657	18.8069	18.171	19.4159	18.9482
H1-3	24.9706	24.9248	24.9636	24.8752	25.0197	24.8986	24.8881	24.8387	24.9207	25.0019	24.8244	24.8967	24.1207	23.1313	24.6689	24.3078
H1-4	20.6976	20.8008	20.8325	20.7159	20.8714	20.7042	20.5512	20.6456	20.8726	20.9133	20.8456	20.8623	20.1192	19.4496	20.4605	20.1657
H1-5	22.5209	22.4797	22.4734	22.3255	22.4868	22.2721	22.1259	22.2365	22.4728	22.5439	22.4167	22.4015	21.8727	21.0572	22.3194	21.9175
H2-Aa	13.2216	13.2112	13.2039	13.1869	12.9064	13.0828	12.6707	12.7391	12.8797	12.7986	13.0786	13.024	13.5591	13.533	13.3524	13.6166
H2-D1	21.3663	20.7461	21.2916	20.8822	20.512	21.2434	21.101	20.7101	20.6389	21.1145	21.0507	21.3434	20.4151	20.2605	20.7874	21.0581
H2-K1	19.508	19.1413	19.4878	19.1069	18.7442	19.1771	19.23	18.4598	18.7729	19.32	19.238	19.4763	18.5704	18.1579	18.7812	18.9167
H2-K1.1	14.922	14.3915	15.1668	14.7721	14.5451	14.7864	13.9713	14.02	14.6495	14.7121	14.9184	15.1293	14.1411	13.5691	14.2614	14.3086
H2-L	16.9694	16.2964	17.1009	16.5874	16.2271	17.019	16.5189	15.8692	16.3162	16.6916	16.748	17.0055	15.9616	12.8146	16.2545	16.4855
H2ac15	15.7712	15.6327	15.7108	15.5929	15.8601	15.7278	15.7408	15.7865	15.0825	15.3209	15.0851	15.0473	14.7904	14.3816	15.2679	15.334
H2afv	21.4774	21.3116	21.286	21.359	21.3047	20.9219	20.942	20.971	21.3562	21.5582	21.3474	21.2589	20.807	20.2675	21.1355	20.696
H2afy2	19.5061	19.3928	19.4252	19.4952	19.3581	18.7994	18.7121	19.066	19.7442	19.6294	19.4194	19.4391	19.0179	18.6634	19.2885	19.0826
H2ax	23.3429	23.3827	23.6371	23.5842	23.6929	23.2459	23.211	23.1746	23.6998	23.6906	23.6925	23.4726	22.9565	22.0199	23.1992	22.8161
H2bc4	26.3772	26.2951	26.3532	26.3534	26.4164	26.3323	25.9808	26.3167	26.4385	26.5414	26.397	26.3551	25.9257	25.4861	26.1754	26.0342
H3-3a	19.4914	19.5176	19.6323	19.5142	19.6108	19.1834	19.3288	19.1521	19.7622	19.7276	19.618	19.48	18.8322	17.6175	19.3034	18.7597
H4c1	25.6063	25.6129	25.7126	25.7147	25.5761	25.3926	24.9246	25.6007	25.6621	25.7708	25.5895	25.4911	24.7852	24.5778	25.3172	25.1601
H6pd	16.3174	16.2664	16.2463	16.1404	16.1558	16.0113	16.9466	16.0062	16.1356	16.0506	16.0795	15.9519	16.4324	16.0594	16.586	16.4882
Hacd2	13.3774	13.2144	13.1966	13.2527	13.1932	13.5872	13.7482	13.431	13.1227	13.3067	13.2467	13.1911	13.5261	13.7435	13.4929	13.438
Hacd3	17.7731	17.8167	17.7863	18.0074	17.6711	17.6568	17.9539	18.1613	17.9122	17.9809	17.8696	17.8905	17.7541	18.1146	17.865	17.809
Hace1	12.6941	12.7115	12.5663	12.2001	12.8439	12.6913	12.5889	14.3361	12.5825	12.4697	12.7758	12.9644	12.2422	13.0574	12.4659	12.4974
Hacl1	15.7602	15.5428	15.9793	15.729	15.7667	15.2688	17.4249	15.0082	15.4099	15.5853	15.2946	15.4844	15.5077	15.2523	15.7214	15.362
Hadh	19.9045	19.8812	19.8961	19.855	19.9259	19.9239	20.1389	19.7494	19.6822	20.0595	19.8437	19.7984	19.8309	19.4126	20.0776	19.8748
Hadha	22.9151	22.941	22.917	22.9311	22.8884	22.7259	23.2789	23.0248	22.8326	22.9882	22.8515	22.8781	23.0195	22.5669	23.0138	23.0253
Hadhb	21.2133	21.0722	20.9765	20.9374	21.0239	21.2806	21.5023	21.1549	20.7629	21.2114	20.8661	20.8821	21.2653	21.0858	21.3484	21.3022
Hagh	17.3389	17.5244	17.4136	17.2886	17.5667	17.571	17.9756	17.4603	17.2824	17.3176	17.4623	17.4272	17.4134	17.9257	17.5614	17.6067
Hapln1	15.9311	16.5395	16.0884	16.2361	15.8939	16.1908	15.824	16.0685	15.8256	16.4244	16.2745	16.1403	16.6317	17.3857	16.7492	17.1346
Hars1	18.413	18.4433	18.5325	18.4566	18.4853	18.6171	18.486	18.4317	18.4751	18.2824	18.4598	18.3585	18.4718	18.6049	18.4276	18.5843
Hars2	15.0369	14.9826	15.0628	14.9667	14.878	14.7726	13.6464	14.8508	15.0975	14.9568	14.976	15.0202	15.0842	14.7842	14.9966	15.0893
Hat1	12.3581	12.2834	12.2579	12.5648	12.4254	12.714	12.5733	12.7356	12.67	12.397	12.8199	12.51	12.5439	12.8059	12.3402	12.4135
Hba	23.9565	23.8343	23.5222	23.7882	23.9658	23.4284	24.097	23.7604	23.9196	23.6873	23.4807	23.5672	23.1255	22.6994	23.7108	23.1815
Hbb-b1	23.3173	23.2754	23.03	23.4154	23.4669	22.8752	23.2588	23.1786	23.382	23.1248	23.0358	23.1502	22.5682	22.0846	23.1997	22.7181
Hbb-b2	24.4085	24.3772	24.0606	24.4371	24.5107	24.1448	24.5327	24.3483	24.4379	24.2385	24.0134	24.1428	23.7412	23.2474	24.3056	23.7681
Hbb-y	15.1278	16.3695	16.727	17.6439	17.0281	15.2771	16.2761	15.1887	16.5713	14.4033	15.9556	15.5802	13.2699	14.8541	14.5032	14.6526
Hbs1l	15.2861	15.0525	15.1692	15.3102	15.318	14.6854	14.8068	15.3779	15.1267	15.1514	15.1685	15.0755	15.2307	15.2905	15.3738	15.1844
Hccs	16.6474	16.8262	16.83	16.8215	16.8176	16.7523	16.61	16.9132	16.6369	16.7796	16.7721	16.6763	17.0487	16.8448	16.9775	17.0031
Hcfc1	18.6299	18.5922	18.4116	18.4629	18.3961	18.5309	18.4905	18.6136	18.5208	18.5392	18.4915	18.4404	18.4035	18.4053	18.4512	18.351
Hcls1	13.9668	14.1284	14.1136	14.1823	14.0868	13.9254	14.0325	14.2893	14.5464	14.0583	14.5659	14.1572	14.8296	14.7954	14.8072	15.121
Hdac1	19.201	19.1336	19.1439	19.1663	19.2053	19.0255	18.8926	19.075	19.0448	19.2	19.1448	19.0802	18.7452	18.2255	19.0135	18.7499
Hdac11	14.3941	14.7014	15.0219	14.778	15.0325	15.4414	15.2332	15.0625	14.5866	14.1385	14.964	14.9155	15.7264	17.3917	15.4086	15.6827
Hdac2	17.0612	17.0571	16.9819	17.0331	17.0468	17.0093	16.7638	16.9404	17.2386	17.0855	17.0684	17.0686	16.7071	16.6614	16.9959	16.9298
Hdac3	13.8436	14.1074	13.7854	14.1307	13.7247	13.8322	13.7639	14.0968	14.1091	14.0492	14.1415	14.0516	13.5545	12.788	14.0433	14.1212
Hdac5	13.1161	13.252	13.1686	13.3402	13.2276	13.3413	12.806	13.2738	13.2627	13.0632	13.3898	12.9874	13.2371	13.8812	13.1468	13.4208
Hdac6	11.9744	11.9062	11.7875	11.9469	12.0275	12.5807	12.4891	12.2386	12.1365	11.9046	12.1024	12.1209	12.1155	12.8301	11.9387	12.5546
Hdac7	13.1229	13.2953	13.4244	13.2353	13.1524	13.4916	13.4697	13.313	13.596	13.1546	13.3737	13.3149	13.219	13.344	13.1767	13.258
Hddc2	13.3157	12.9723	12.9824	13.2334	13.1971	13.1226	12.9874	12.9867	13.1554	12.9999	13.4681	13.4512	12.877	13.4152	13.2442	12.1066
Hddc3	14.3808	14.5787	14.5598	14.5721	14.4955	14.3788	13.9971	14.1862	14.4698	14.5579	14.7797	14.7211	14.3945	15.2132	14.4905	14.2136
Hdgf	20.2907	20.3027	20.3664	20.2854	20.3899	20.3179	20.3404	20.1701	20.5183	20.3289	20.3884	20.3639	19.9496	19.2122	20.2429	19.5791
Hdgfl2	16.8258	17.0198	17.2154	16.9961	17.0394	16.4982	16.7018	16.6611	16.9557	16.7108	16.8121	16.8124	16.1289	14.9028	16.4564	16.3032
Hdgfl3	20.2992	20.3944	20.4112	20.4615	20.4879	20.5693	20.3463	20.3203	20.331	20.5133	20.3815	20.3394	20.131	19.6108	20.3812	20.0262
Hdhd2	17.5831	17.9281	17.7812	17.7781	17.9775	17.5822	17.7668	17.6648	17.6804	17.573	17.8754	17.7367	17.8486	18.7066	17.8938	17.6866
Hdhd3	16.4171	16.67	16.7517	16.7017	16.6882	17.0789	17.3629	17.2381	16.3112	16.2711	16.3092	16.4178	16.4426	16.9043	16.5155	16.4142
Hdhd5	14.3144	14.2481	14.51	14.536	14.5995	14.236	14.4831	14.4259	14.2299	14.69	14.4233	14.4114	14.6221	14.3189	14.4204	14.5526
Hdlbp	20.5298	20.456	20.428	20.4462	20.3887	20.6184	20.8099	20.7682	20.45	20.5029	20.503	20.4807	20.2764	19.9743	20.3826	20.2302
Heatr5a	15.6556	15.59	15.6658	15.7429	15.7512	15.3129	15.4476	15.7997	15.8711	15.6834	15.7861	15.6676	18.9764	17.5212	16.2789	17.4705
Heatr5b	15.9412	15.9781	16.0904	16.0108	15.9686	15.9443	15.9474	16.0599	16.0215	15.8982	15.9326	16.0547	15.5817	15.5966	15.7801	16.0046
Heatr6	12.4984	12.4511	12.4197	12.6289	12.4373	13.1106	12.5963	12.703	12.7706	12.5507	12.5301	12.6876	12.905	12.922	12.4938	12.3233
Hebp1	18.0888	17.8743	17.7496	17.7555	17.8497	18.5728	17.8374	17.8683	17.4703	17.784	17.6357	17.7044	18.0437	19.0878	18.2481	17.9796
Hectd1	13.7553	13.8953	13.853	13.7873	13.6954	12.5604	13.1991	13.3717	13.9109	13.5567	13.4537	13.8762	13.3643	13.1881	13.5061	13.1162
Hectd3	14.0303	13.9375	14.0456	13.9545	14.392	13.1928	13.9265	13.9846	14.141	14.274	13.982	13.7517	14.2121	13.6291	13.8856	14.1122
Heg1	16.719	16.8264	16.7767	16.8772	16.8338	16.9314	16.5191	16.7427	16.9686	16.7498	16.7036	16.9215	16.4718	16.0925	16.6505	16.3614
Hepacam	15.7757	15.687	16.0387	15.9676	16.0281	16.1812	15.574	15.3805	15.5581	15.6673	16.3945	16.2877	17.8302	18.5347	17.8676	17.9219
Herc4	16.7183	16.671	16.7145	16.7531	16.8264	16.765	16.56	16.7202	16.6472	16.6139	16.5874	16.7968	16.9564	16.5849	16.6602	16.9569
Hexa	17.4327	17.5498	17.2776	17.4044	17.2686	16.8559	16.8058	17.1828	17.5163	17.5436	17.3153	17.3608	17.3794	17.1186	17.3159	17.4851
Hexb	20.5297	20.6234	20.2073	20.2325	20.261	19.7293	19.6465	19.9594	20.4516	20.2333	20.525	20.3127	20.5629	19.9215	20.081	20.0688
Hexim1	15.986	15.9366	15.8923	15.9231	15.7792	15.7294	16.1105	15.9982	15.7686	15.9094	15.6611	15.7466	15.6819	15.1971	15.9193	15.6953
Hfe	13.7985	13.5176	13.5128	13.4773	13.1635	13.9217	14.0655	13.6377	13.4665	13.5629	13.3238	13.6588	14.0265	13.0909	13.2831	13.8567
Hgs	17.5678	17.5264	17.6094	17.5241	17.6624	17.6382	17.7027	17.4315	17.6718	17.5627	17.607	17.6805	17.2696	17.1676	17.434	17.3166
Hibadh	17.7372	17.534	17.5865	17.4046	17.5791	17.5281	17.3064	17.3255	17.2478	17.8406	17.5409	17.5521	17.8972	18.174	17.8275	17.7951
Hibch	18.7248	18.5799	18.6965	18.5281	18.7208	18.6259	18.8045	18.4384	18.4794	18.887	18.7446	18.6499	18.8098	18.6715	18.7977	18.8946
Hid1	12.7301	12.8539	12.8108	12.8676	12.7154	12.6138	13.1954	13.3299	12.9244	12.9117	12.8873	12.7174	13.2945	13.588	12.5237	12.9253
[truncated: 3,268 more rows]
