# Supplementary material for: Altered Blood–Brain Barrier Dynamics in the C9orf72 Hexanucleotide Repeat Expansion Mouse Model of Amyotrophic Lateral Sclerosis
Source: Pharmaceutics. 2022 Dec 14;14(12):2803. doi: 10.3390/pharmaceutics14122803 (PMC9783795; doi:10.3390/pharmaceutics14122803)
Supplement: Supplementary file 1 [file pharmaceutics-14-02803-s001.zip › Supplementary Materials Spreadsheet S2 - Functional enrichement.xlsx]

## Sheet: BP
#term ID	term description	genes mapped	enrichment score	direction	false discovery rate	method	matching proteins in your input (IDs)	matching proteins in your input (labels)
GO:0001505	Regulation of neurotransmitter levels	110	0.852911	top	1.4e-10	ks	10090.ENSMUSP00000000199,10090.ENSMUSP00000001569,10090.ENSMUSP00000002603,10090.ENSMUSP00000003961,10090.ENSMUSP00000005509,10090.ENSMUSP00000005606,10090.ENSMUSP00000006181,10090.ENSMUSP00000007236,10090.ENSMUSP00000007803,10090.ENSMUSP00000009538,10090.ENSMUSP00000010038,10090.ENSMUSP00000017276,10090.ENSMUSP00000017831,10090.ENSMUSP00000017975,10090.ENSMUSP00000019577,10090.ENSMUSP00000020057…	Ncs1,Flot1,Scrib,Ppfia3,Stx1a,Prkaca,Napa,Syngr3,Bcl2l1,Syn2,Snap47,Cyth1,Rhot1,Rab5a,Gipc1,Lin7a,Itgb3,Vamp2,Pde1b,Snap29,Gsk3b,Sncg,Apba1,Maoa,Cplx2,Pnkd,Aldh9a1,Tor1a,Lin7c,Snap25,Napb,Slc6a9,Ppt1,Park7,Cdk5,Stx2,Atp2a2,Slc6a11,Slc6a1,Vamp1,Pak1,Stx4a,Cask,Myo6,Vps18,Git1,Sv2a,Cplx1,Maob,Aldh5a1,Arl6ip5,Rab3gap1,Slc30a1,Syde1,Pebp1,Pdzd11,Lrrk2,Kcnj10,Adrb2,Prkca,Hnmt,Gfap,Cadps,Rap1b,Pfn2,Syp…
GO:0050804	Modulation of chemical synaptic transmission	200	0.591855	top	1.81e-09	ks	10090.ENSMUSP00000000199,10090.ENSMUSP00000001569,10090.ENSMUSP00000003121,10090.ENSMUSP00000003268,10090.ENSMUSP00000003550,10090.ENSMUSP00000003754,10090.ENSMUSP00000003961,10090.ENSMUSP00000004076,10090.ENSMUSP00000005406,10090.ENSMUSP00000005493,10090.ENSMUSP00000005509,10090.ENSMUSP00000005606,10090.ENSMUSP00000006181,10090.ENSMUSP00000007803,10090.ENSMUSP00000010038,10090.ENSMUSP00000013807…	Ncs1,Flot1,Rab8a,Sh3gl1,Ncstn,Calb2,Ppfia3,Grm3,App,Slc1a3,Stx1a,Prkaca,Napa,Bcl2l1,Snap47,Pten,Plg,Cyth1,Mpp2,Rhot1,Rab5a,Dlg4,Gipc1,Eif4ebp2,Egfr,Psmc5,Vamp2,Lgmn,Cyp46a1,Dbn1,Nisch,Gsk3b,Adipoq,Sncg,Kif5b,Cdh2,Csnk2b,Adrbk1,Apba1,Baiap2,Hras,Eif4a3,Cplx2,Pnkd,Epha4,Serpine2,Fcgr2b,Tor1a,Snap25,Itpka,Napb,Car2,Src,Bche,Gucy1b3,Eif4e,Calb1,Ncdn,Cdk5,Cd38,Atp2a2,Slc6a6,Kras,Slc6a1,Vamp1,Cyfip1,Pa…
GO:0099537	Trans-synaptic signaling	104	0.72405	top	1.9e-07	ks	10090.ENSMUSP00000000058,10090.ENSMUSP00000002603,10090.ENSMUSP00000003961,10090.ENSMUSP00000004076,10090.ENSMUSP00000005509,10090.ENSMUSP00000005606,10090.ENSMUSP00000006181,10090.ENSMUSP00000007130,10090.ENSMUSP00000009538,10090.ENSMUSP00000010038,10090.ENSMUSP00000013807,10090.ENSMUSP00000014578,10090.ENSMUSP00000017458,10090.ENSMUSP00000017900,10090.ENSMUSP00000018700,10090.ENSMUSP00000019577…	Cav2,Scrib,Ppfia3,Grm3,Stx1a,Prkaca,Napa,Ctnnb1,Syn2,Snap47,Pten,Plg,Mpp2,Slc12a7,Dlg4,Gipc1,Lin7a,Pafah1b1,Vamp2,Snap29,Sncg,Apba1,Farp1,Cplx2,Als2,Slc12a6,Lin7c,Snap25,Napb,Gucy1b3,Sdcbp,Slc6a9,Ppt1,Park7,Cdk5,Stx2,P2rx4,Vamp1,Fchsd2,Pak1,Stx4a,Mecp2,Plat,Myo6,Clstn1,Spg11,Sv2a,Cplx1,Rab3gap1,Sncb,Syde1,Gucy1a3,Pdzd11,Exoc4,Lrrk2,Ppp3ca,Kif1b,Adrb2,Dlg1,Cadps,Syp,Nf1,Mink1,Rph3a,Erc1,Rac1,Slc17…
GO:0007268	Chemical synaptic transmission	96	0.757588	top	2.28e-07	ks	10090.ENSMUSP00000000058,10090.ENSMUSP00000002603,10090.ENSMUSP00000003961,10090.ENSMUSP00000004076,10090.ENSMUSP00000005509,10090.ENSMUSP00000005606,10090.ENSMUSP00000006181,10090.ENSMUSP00000007130,10090.ENSMUSP00000009538,10090.ENSMUSP00000010038,10090.ENSMUSP00000013807,10090.ENSMUSP00000017458,10090.ENSMUSP00000017900,10090.ENSMUSP00000018700,10090.ENSMUSP00000019577,10090.ENSMUSP00000020057…	Cav2,Scrib,Ppfia3,Grm3,Stx1a,Prkaca,Napa,Ctnnb1,Syn2,Snap47,Pten,Mpp2,Slc12a7,Dlg4,Gipc1,Lin7a,Pafah1b1,Vamp2,Snap29,Sncg,Apba1,Cplx2,Als2,Slc12a6,Lin7c,Snap25,Napb,Sdcbp,Slc6a9,Ppt1,Park7,Cdk5,Stx2,P2rx4,Vamp1,Fchsd2,Pak1,Stx4a,Mecp2,Plat,Myo6,Clstn1,Spg11,Sv2a,Cplx1,Rab3gap1,Sncb,Syde1,Pdzd11,Exoc4,Lrrk2,Ppp3ca,Kif1b,Adrb2,Dlg1,Cadps,Syp,Nf1,Mink1,Rph3a,Erc1,Rac1,Slc17a7,Erc2,Stxbp1,Usp14,Snap9…
GO:0099536	Synaptic signaling	121	0.717675	top	8.48e-07	ks	10090.ENSMUSP00000000058,10090.ENSMUSP00000002603,10090.ENSMUSP00000003961,10090.ENSMUSP00000004054,10090.ENSMUSP00000004076,10090.ENSMUSP00000005509,10090.ENSMUSP00000005606,10090.ENSMUSP00000006181,10090.ENSMUSP00000006293,10090.ENSMUSP00000007130,10090.ENSMUSP00000009538,10090.ENSMUSP00000010038,10090.ENSMUSP00000013807,10090.ENSMUSP00000014578,10090.ENSMUSP00000017458,10090.ENSMUSP00000017900…	Cav2,Scrib,Ppfia3,Kpna1,Grm3,Stx1a,Prkaca,Napa,Crkl,Ctnnb1,Syn2,Snap47,Pten,Plg,Mpp2,Slc12a7,Kpna2,Dlg4,Gipc1,Lin7a,Pafah1b1,Vamp2,Snap29,Sncg,Apba1,Rela,Farp1,Cplx2,Als2,Slc12a6,Lin7c,Snap25,Napb,Gucy1b3,Sdcbp,Slc6a9,Ppt1,Park7,Cdk5,Stx2,P2rx4,Vamp1,Fchsd2,Pak1,Stx4a,Rgs10,Mecp2,Plat,Myo6,Clstn1,Spg11,Sv2a,Cplx1,Rab3gap1,Sncb,Syde1,Gucy1a3,Pdzd11,Exoc4,Lrrk2,Ppp3ca,Ly6e,Gnai2,Kif1b,Adrb2,Dlg1,Ca…
GO:0006836	Neurotransmitter transport	57	0.972525	top	1.1e-06	ks	10090.ENSMUSP00000002603,10090.ENSMUSP00000003961,10090.ENSMUSP00000005509,10090.ENSMUSP00000005606,10090.ENSMUSP00000006181,10090.ENSMUSP00000007236,10090.ENSMUSP00000009538,10090.ENSMUSP00000010038,10090.ENSMUSP00000020057,10090.ENSMUSP00000021273,10090.ENSMUSP00000023449,10090.ENSMUSP00000026985,10090.ENSMUSP00000028583,10090.ENSMUSP00000028727,10090.ENSMUSP00000030269,10090.ENSMUSP00000030412…	Scrib,Ppfia3,Stx1a,Prkaca,Napa,Syngr3,Syn2,Snap47,Lin7a,Vamp2,Snap29,Cplx2,Lin7c,Snap25,Slc6a9,Ppt1,Park7,Stx2,Slc6a11,Slc6a1,Vamp1,Pak1,Stx4a,Sv2a,Cplx1,Syde1,Pdzd11,Kcnj10,Cadps,Nf1,Rph3a,Erc1,Slc1a2,Slc17a7,Atp1a2,Erc2,Stxbp1,Snap91,Psen1,Stxbp3a,Syt1,Stx1b,Unc13b,Rab3a,Snca,Syn1,Snap23,Syt2,Synj1,Snapin,Prrt2,Stxbp2,Sv2b,Syt7,Ctbp2,Slc29a1,Ddc
GO:0098609	Cell-cell adhesion	138	0.821802	both ends	1.25e-06	ks	10090.ENSMUSP00000000129,10090.ENSMUSP00000000299,10090.ENSMUSP00000001055,10090.ENSMUSP00000001592,10090.ENSMUSP00000002011,10090.ENSMUSP00000002603,10090.ENSMUSP00000002979,10090.ENSMUSP00000007130,10090.ENSMUSP00000008733,10090.ENSMUSP00000015146,10090.ENSMUSP00000015791,10090.ENSMUSP00000016638,10090.ENSMUSP00000016771,10090.ENSMUSP00000018315,10090.ENSMUSP00000018700,10090.ENSMUSP00000020078…	Fer,Itgb2,Icam2,Jup,Esam,Scrib,Lamb1,Ctnnb1,Dnajb6,Efr3a,Lama5,Cd34,Myh9,Vmp1,Dlg4,Lims1,Egfr,Itgb3,Pnn,Emb,Vcl,Itga5,Alcam,Cd2ap,Cdh2,Lims2,Ric8,Itgav,Itga6,Src,Vcam1,Lef1,Tln1,Sparcl1,Add2,Parva,Gpc4,Cbln1,Kifc3,Cdh5,Jam3,Apoa4,Mcam,Pik3cb,Rpsa,Lpp,Rac2,Clstn1,Fgg,Nexn,Fermt3,Rap2b,Atp2c1,Ppp1ca,Pcdh18,Fgb,Tln2,F11r,Cldn5,Cldn11,Cdh10,Thbs1,Ptprm,Atp1b2,Ctnna1,Plxnb2,Pdia6,Cdc42,Golph3,Tgfbr2,E…
GO:0051588	Regulation of neurotransmitter transport	63	0.860523	top	3.51e-06	ks	10090.ENSMUSP00000000199,10090.ENSMUSP00000001569,10090.ENSMUSP00000005509,10090.ENSMUSP00000006181,10090.ENSMUSP00000007803,10090.ENSMUSP00000017276,10090.ENSMUSP00000017831,10090.ENSMUSP00000017975,10090.ENSMUSP00000019577,10090.ENSMUSP00000021028,10090.ENSMUSP00000023507,10090.ENSMUSP00000023826,10090.ENSMUSP00000025830,10090.ENSMUSP00000026985,10090.ENSMUSP00000027370,10090.ENSMUSP00000028200…	Ncs1,Flot1,Stx1a,Napa,Bcl2l1,Cyth1,Rhot1,Rab5a,Gipc1,Itgb3,Gsk3b,Sncg,Apba1,Cplx2,Pnkd,Tor1a,Napb,Cdk5,Atp2a2,Vamp1,Cask,Myo6,Vps18,Git1,Cplx1,Arl6ip5,Rab3gap1,Slc30a1,Lrrk2,Adrb2,Prkca,Gfap,Rap1b,Pfn2,Syp,Prkcb,Nf1,Dtnbp1,Erc1,Fmr1,Itgb1,Rap1a,Stxbp1,Sept5,Prkce,Prkcg,Fbxl20,Nos1,Camk2a,Syt1,Stx1b,Unc13b,Rab3a,Git2,Gpm6b,Snca,Dnm1l,Syt2,Snapin,Stxbp5,Prrt2,Syt7,Prepl
GO:0015672	Monovalent inorganic cation transport	107	0.502025	top	3.62e-06	ks	10090.ENSMUSP00000000090,10090.ENSMUSP00000000619,10090.ENSMUSP00000003115,10090.ENSMUSP00000004396,10090.ENSMUSP00000004774,10090.ENSMUSP00000005431,10090.ENSMUSP00000005493,10090.ENSMUSP00000006435,10090.ENSMUSP00000013304,10090.ENSMUSP00000014457,10090.ENSMUSP00000015934,10090.ENSMUSP00000016396,10090.ENSMUSP00000017900,10090.ENSMUSP00000018710,10090.ENSMUSP00000019231,10090.ENSMUSP00000019354…	Cox5a,Clcn4-2,Cdkn1b,Atp6v1f,Aqp1,Letm1,Slc1a3,Atp6v1b2,Atp6v0d1,Cox6c,Surf1,Atp5e,Slc12a7,Slc2a4,Atp6ap1,Atp6v1e1,Slc9a3r1,Atp2a3,Atp6v1d,Atp6v1c1,Slc38a2,Cyc1,Atp5j,Atp5o,Rhag,Atp6v0c,Slc1a1,Cdk2,Atp5b,Atp5a1,Ccdc51,Atp1b1,Slc12a6,Commd9,Snap25,Slc23a2,Slc33a1,Stoml2,Slc6a9,Mfsd2a,Slc9a1,Atp2a2,Ndufa4,Slc6a6,Slc6a11,Slc6a1,Cox4i1,Cox7a2,Atp1b3,Slc12a9,Atp2c1,Atp1a1,Atp6v0a2,Trpm4,Atp6v1h,Cox15,…
GO:0017157	Regulation of exocytosis	118	0.871113	top	5.56e-06	ks	10090.ENSMUSP00000000129,10090.ENSMUSP00000000199,10090.ENSMUSP00000000299,10090.ENSMUSP00000003121,10090.ENSMUSP00000004565,10090.ENSMUSP00000005509,10090.ENSMUSP00000005711,10090.ENSMUSP00000006181,10090.ENSMUSP00000006217,10090.ENSMUSP00000007803,10090.ENSMUSP00000009003,10090.ENSMUSP00000014546,10090.ENSMUSP00000017276,10090.ENSMUSP00000017975,10090.ENSMUSP00000018544,10090.ENSMUSP00000019231…	Fer,Ncs1,Itgb2,Rab8a,Ralb,Stx1a,Chmp2a,Napa,Snf8,Bcl2l1,Rala,Tsg101,Cyth1,Rab5a,Sept4,Atp6ap1,Gipc1,Rab21,Rab10,Vamp2,Glrx,Snx4,Gsk3b,Anxa1,Apba1,Rabgef1,Hgs,Cplx2,Notch1,Napb,Sdcbp,Cdk5,Atp2a2,Vamp1,D6Wsu163e,Stx4a,Cask,Sytl4,Lamp1,Vps4a,Rab27a,Myo6,Rac2,Syt15,Vps18,Fgg,Git1,Cplx1,Lyn,Fgb,Rab8b,Rab3gap1,Lgi3,Vamp7,Lrrk2,Gnai2,Vamp8,Adrb2,Prkca,Rab33b,Cadps,Rap1b,Itgam,Pfn2,Syp,Prkcb,Rab12,Rab13,…
GO:0098662	Inorganic cation transmembrane transport	164	0.364411	top	5.56e-06	ks	10090.ENSMUSP00000000090,10090.ENSMUSP00000000199,10090.ENSMUSP00000000619,10090.ENSMUSP00000004396,10090.ENSMUSP00000004774,10090.ENSMUSP00000005431,10090.ENSMUSP00000005493,10090.ENSMUSP00000006435,10090.ENSMUSP00000010804,10090.ENSMUSP00000013304,10090.ENSMUSP00000014457,10090.ENSMUSP00000014920,10090.ENSMUSP00000015934,10090.ENSMUSP00000016396,10090.ENSMUSP00000017900,10090.ENSMUSP00000018651…	Cox5a,Ncs1,Clcn4-2,Atp6v1f,Aqp1,Letm1,Slc1a3,Atp6v1b2,Plcd1,Atp6v0d1,Cox6c,Nol3,Surf1,Atp5e,Slc12a7,Trpv2,Slc2a4,Atp6ap1,Atp6v1e1,Atp2b1,Mcu,Atp2a3,Atp6v1d,Mrs2,Mcur1,Ero1l,Atp6v1c1,Slc38a2,Cyc1,Tfrc,Atp5j,Atp5o,Rhag,Atp6v0c,Slc39a7,Afg3l2,Slc1a1,Plcb3,Atp5b,Atp5a1,Ccdc51,Maip1,Slc39a10,Slc40a1,Atp1b1,Slc25a25,Itgav,Slc12a6,Snap25,Slc23a2,Anxa5,Slc33a1,Ccdc109b,Stoml2,Slc6a9,Mfsd2a,Slc9a1,Cdk5,Tm…
GO:0046928	Regulation of neurotransmitter secretion	55	0.868746	top	7.91e-06	ks	10090.ENSMUSP00000000199,10090.ENSMUSP00000005509,10090.ENSMUSP00000006181,10090.ENSMUSP00000007803,10090.ENSMUSP00000017276,10090.ENSMUSP00000017831,10090.ENSMUSP00000017975,10090.ENSMUSP00000019577,10090.ENSMUSP00000023507,10090.ENSMUSP00000023826,10090.ENSMUSP00000025830,10090.ENSMUSP00000026985,10090.ENSMUSP00000027370,10090.ENSMUSP00000028926,10090.ENSMUSP00000030814,10090.ENSMUSP00000031423…	Ncs1,Stx1a,Napa,Bcl2l1,Cyth1,Rhot1,Rab5a,Gipc1,Gsk3b,Sncg,Apba1,Cplx2,Pnkd,Napb,Cdk5,Atp2a2,Vamp1,Cask,Myo6,Vps18,Git1,Cplx1,Rab3gap1,Slc30a1,Lrrk2,Adrb2,Prkca,Rap1b,Pfn2,Syp,Prkcb,Nf1,Dtnbp1,Erc1,Fmr1,Rap1a,Stxbp1,Sept5,Prkce,Prkcg,Fbxl20,Camk2a,Syt1,Stx1b,Unc13b,Rab3a,Git2,Snca,Dnm1l,Syt2,Snapin,Stxbp5,Prrt2,Syt7,Prepl
GO:0098693	Regulation of synaptic vesicle cycle	75	0.793201	top	7.91e-06	ks	10090.ENSMUSP00000000199,10090.ENSMUSP00000003268,10090.ENSMUSP00000005509,10090.ENSMUSP00000006181,10090.ENSMUSP00000007216,10090.ENSMUSP00000007803,10090.ENSMUSP00000013807,10090.ENSMUSP00000017276,10090.ENSMUSP00000017975,10090.ENSMUSP00000018710,10090.ENSMUSP00000019577,10090.ENSMUSP00000021273,10090.ENSMUSP00000023449,10090.ENSMUSP00000023507,10090.ENSMUSP00000025166,10090.ENSMUSP00000025830…	Ncs1,Sh3gl1,Stx1a,Napa,Ap2m1,Bcl2l1,Pten,Cyth1,Rab5a,Slc2a4,Gipc1,Vamp2,Snap29,Gsk3b,Cdh2,Apba1,Cplx2,Tor1a,Napb,Cdk5,Atp2a2,Vamp1,Cyfip1,Cask,Pls3,Myo6,Vps18,Git1,Cplx1,Rab3gap1,Picalm,Vamp4,Lrrk2,Adrb2,Prkca,Dnm3,Rap1b,Gripap1,Pfn2,Syp,Rock1,Prkcb,Dtnbp1,Dnajc5,Mff,Erc1,Slc17a7,Fmr1,Rap1a,Dnm1,Stxbp1,Sept5,Prkce,Snap91,Prkcg,Fbxl20,Rapgef4,Camk2a,Syt1,Pip5k1c,Stx1b,Plaa,Unc13b,Rab3a,Git2,Syn1,D…
GO:0098655	Cation transmembrane transport	188	0.298974	top	7.95e-06	ks	10090.ENSMUSP00000000090,10090.ENSMUSP00000000199,10090.ENSMUSP00000000619,10090.ENSMUSP00000004396,10090.ENSMUSP00000004774,10090.ENSMUSP00000005431,10090.ENSMUSP00000005493,10090.ENSMUSP00000006435,10090.ENSMUSP00000010251,10090.ENSMUSP00000010804,10090.ENSMUSP00000013304,10090.ENSMUSP00000014457,10090.ENSMUSP00000014920,10090.ENSMUSP00000015934,10090.ENSMUSP00000016396,10090.ENSMUSP00000017900…	Cox5a,Ncs1,Clcn4-2,Atp6v1f,Aqp1,Letm1,Slc1a3,Atp6v1b2,Slc22a8,Plcd1,Atp6v0d1,Cox6c,Nol3,Surf1,Atp5e,Slc12a7,Trpv2,Slc2a4,Atp6ap1,Atp6v1e1,Atp2b1,Mcu,Atp2a3,Atp6v1d,Mrs2,Mcur1,Sfxn1,Ero1l,Atp6v1c1,Slc38a2,Cyc1,Tfrc,Atp5j,Atp5o,Rhag,Atp6v0c,Slc39a7,Afg3l2,Slc1a1,Plcb3,Atp5b,Atp5a1,Ccdc51,Maip1,Slc39a10,Slc40a1,Tmem63a,Atp1b1,Slc25a25,Itgav,Slc12a6,Snap25,Slc23a2,Anxa5,Slc33a1,Ccdc109b,Stoml2,Slc6a9…
GO:1903305	Regulation of regulated secretory pathway	77	0.711944	top	1.06e-05	ks	10090.ENSMUSP00000000129,10090.ENSMUSP00000000199,10090.ENSMUSP00000000299,10090.ENSMUSP00000005509,10090.ENSMUSP00000006181,10090.ENSMUSP00000007803,10090.ENSMUSP00000017276,10090.ENSMUSP00000017975,10090.ENSMUSP00000019577,10090.ENSMUSP00000021273,10090.ENSMUSP00000023502,10090.ENSMUSP00000023507,10090.ENSMUSP00000025830,10090.ENSMUSP00000026390,10090.ENSMUSP00000026985,10090.ENSMUSP00000028288…	Fer,Ncs1,Itgb2,Stx1a,Napa,Bcl2l1,Cyth1,Rab5a,Gipc1,Vamp2,Snx4,Gsk3b,Apba1,Rabgef1,Cplx2,Notch1,Napb,Cdk5,Atp2a2,Vamp1,D6Wsu163e,Stx4a,Cask,Lamp1,Rab27a,Myo6,Rac2,Syt15,Vps18,Git1,Cplx1,Lyn,Rab3gap1,Vamp7,Lrrk2,Gnai2,Vamp8,Adrb2,Prkca,Cadps,Rap1b,Itgam,Pfn2,Syp,Prkcb,Dtnbp1,Erc1,Fmr1,Rap1a,Stxbp1,Ap1g1,Abr,Sept5,Prkce,Ceacam1,Mical1,Prkcg,Fbxl20,Stxbp3a,Camk2a,Syt1,Stx1b,Unc13b,Lgals9,Rab3a,Git2,D…
GO:2000300	Regulation of synaptic vesicle exocytosis	49	0.921367	top	1.25e-05	ks	10090.ENSMUSP00000000199,10090.ENSMUSP00000005509,10090.ENSMUSP00000006181,10090.ENSMUSP00000007803,10090.ENSMUSP00000017276,10090.ENSMUSP00000017975,10090.ENSMUSP00000019577,10090.ENSMUSP00000023507,10090.ENSMUSP00000025830,10090.ENSMUSP00000026985,10090.ENSMUSP00000028926,10090.ENSMUSP00000030814,10090.ENSMUSP00000031423,10090.ENSMUSP00000032487,10090.ENSMUSP00000033321,10090.ENSMUSP00000036181…	Ncs1,Stx1a,Napa,Bcl2l1,Cyth1,Rab5a,Gipc1,Gsk3b,Apba1,Cplx2,Napb,Cdk5,Atp2a2,Vamp1,Cask,Myo6,Vps18,Git1,Cplx1,Rab3gap1,Lrrk2,Adrb2,Prkca,Rap1b,Pfn2,Syp,Prkcb,Dtnbp1,Erc1,Fmr1,Rap1a,Stxbp1,Sept5,Prkce,Prkcg,Fbxl20,Camk2a,Syt1,Stx1b,Unc13b,Rab3a,Git2,Dnm1l,Syt2,Snapin,Stxbp5,Prrt2,Syt7,Prepl
GO:0034116	Positive regulation of heterotypic cell-cell adhesion	5	5.894	top	1.26e-05	afc	10090.ENSMUSP00000001569,10090.ENSMUSP00000037018,10090.ENSMUSP00000039472,10090.ENSMUSP00000110489,10090.ENSMUSP00000133117	Flot1,Fgg,Fgb,Thy1,Fga
GO:0070527	Platelet aggregation	16	3.55159	top	1.26e-05	afc	10090.ENSMUSP00000021028,10090.ENSMUSP00000037018,10090.ENSMUSP00000037858,10090.ENSMUSP00000038841,10090.ENSMUSP00000039472,10090.ENSMUSP00000052912,10090.ENSMUSP00000079341,10090.ENSMUSP00000089051,10090.ENSMUSP00000099375,10090.ENSMUSP00000099681,10090.ENSMUSP00000099945,10090.ENSMUSP00000100964,10090.ENSMUSP00000107607,10090.ENSMUSP00000129124,10090.ENSMUSP00000133117,10090.ENSMUSP00000133474	Itgb3,Fgg,Fermt3,Rap2b,Fgb,Pdia6,Gnas,Stxbp1,Itga2b,Stxbp3a,Plek,Pip5k1c,Cfh,Ptpn6,Fga,Pear1
GO:0072376	Protein activation cascade	7	4.38614	top	1.26e-05	afc	10090.ENSMUSP00000000049,10090.ENSMUSP00000037018,10090.ENSMUSP00000039472,10090.ENSMUSP00000048667,10090.ENSMUSP00000075429,10090.ENSMUSP00000127250,10090.ENSMUSP00000133117	Apoh,Fgg,Fgb,F13a1,Prcp,Mvp,Fga
GO:0072378	Blood coagulation, fibrin clot formation	5	6.09412	top	1.26e-05	afc	10090.ENSMUSP00000000049,10090.ENSMUSP00000037018,10090.ENSMUSP00000039472,10090.ENSMUSP00000048667,10090.ENSMUSP00000133117	Apoh,Fgg,Fgb,F13a1,Fga
GO:0006936	Muscle contraction	55	0.571854	top	1.38e-05	ks	10090.ENSMUSP00000003575,10090.ENSMUSP00000006626,10090.ENSMUSP00000014080,10090.ENSMUSP00000018748,10090.ENSMUSP00000018800,10090.ENSMUSP00000019076,10090.ENSMUSP00000020904,10090.ENSMUSP00000020949,10090.ENSMUSP00000022097,10090.ENSMUSP00000023538,10090.ENSMUSP00000025791,10090.ENSMUSP00000027863,10090.ENSMUSP00000028991,10090.ENSMUSP00000029454,10090.ENSMUSP00000030184,10090.ENSMUSP00000030669…	Tpm4,Actn3,Myl2,Tbx3,Myl4,Map2k3,Rock2,Map2k6,Ndufs6,Mylk,Adrbk1,Atp1b1,Snta1,Casq2,Tpm2,Slc9a1,Cd38,Atp2a2,Fkbp1a,Rcsd1,Ank2,Eef2,Acta2,Cacna2d1,Lmod1,Adrb2,Dlg1,Tmod3,Synm,Col4a3bp,Slc8a1,Aldoa,Myh11,Hsp90aa1,Tmod2,Mtor,Nos1,Atp1a3,Gaa,Camk2d,Tmod1,Myh14,Smad5,Tpm1,Dmd,Pde4d,Tpm3,Gpd1l,Myh1,Slmap,Atp2b4,Srsf1,Myl6,Nup155,Nedd4l
GO:0007269	Neurotransmitter secretion	46	0.890867	top	2.65e-05	ks	10090.ENSMUSP00000002603,10090.ENSMUSP00000003961,10090.ENSMUSP00000005509,10090.ENSMUSP00000005606,10090.ENSMUSP00000006181,10090.ENSMUSP00000009538,10090.ENSMUSP00000010038,10090.ENSMUSP00000020057,10090.ENSMUSP00000021273,10090.ENSMUSP00000023449,10090.ENSMUSP00000026985,10090.ENSMUSP00000028583,10090.ENSMUSP00000028727,10090.ENSMUSP00000030269,10090.ENSMUSP00000030412,10090.ENSMUSP00000031378…	Scrib,Ppfia3,Stx1a,Prkaca,Napa,Syn2,Snap47,Lin7a,Vamp2,Snap29,Cplx2,Lin7c,Snap25,Slc6a9,Ppt1,Stx2,Vamp1,Pak1,Stx4a,Sv2a,Cplx1,Syde1,Pdzd11,Cadps,Nf1,Rph3a,Erc1,Erc2,Stxbp1,Snap91,Psen1,Stxbp3a,Syt1,Stx1b,Unc13b,Rab3a,Snca,Syn1,Snap23,Syt2,Synj1,Snapin,Prrt2,Stxbp2,Syt7,Ctbp2
GO:0048858	Cell projection morphogenesis	188	0.513043	top	2.79e-05	ks	10090.ENSMUSP00000001569,10090.ENSMUSP00000003121,10090.ENSMUSP00000003152,10090.ENSMUSP00000004389,10090.ENSMUSP00000005066,10090.ENSMUSP00000005406,10090.ENSMUSP00000005671,10090.ENSMUSP00000006614,10090.ENSMUSP00000007130,10090.ENSMUSP00000007959,10090.ENSMUSP00000013807,10090.ENSMUSP00000015511,10090.ENSMUSP00000017629,10090.ENSMUSP00000018353,10090.ENSMUSP00000018476,10090.ENSMUSP00000018700…	Flot1,Rab8a,Stk11,Grcc10,Map2k1,App,Igf1r,Epha2,Ctnnb1,Rhoa,Pten,Plxnd1,Top2b,Stk4,Stk3,Dlg4,Map1s,Egfr,Dbnl,Rock2,Rab10,Itgb3,Pafah1b1,Evl,Dbn1,Emb,Vcl,Clu,Dpysl2,Nefl,Rpl24,Alcam,Gsk3b,Hcls1,Hsp90ab1,Kif5b,Impact,Smad4,Afg3l2,Farp1,Hprt,Nrp1,Prex2,Als2,Epha4,Plxna2,Kif5c,Notch1,Nckap1,Sh3gl2,Dock7,Stmn1,Cdk5,Uchl1,Tmem106b,Wasl,Atg7,Vasp,Cyfip1,Pak1,Ilk,Nek3,Gpm6a,Snx1,Nckap1l,Rac2,Nexn,Spg11,S…
GO:0048812	Neuron projection morphogenesis	180	0.517937	top	3.22e-05	ks	10090.ENSMUSP00000001569,10090.ENSMUSP00000003121,10090.ENSMUSP00000003152,10090.ENSMUSP00000004389,10090.ENSMUSP00000005066,10090.ENSMUSP00000005406,10090.ENSMUSP00000005671,10090.ENSMUSP00000006614,10090.ENSMUSP00000007130,10090.ENSMUSP00000007959,10090.ENSMUSP00000013807,10090.ENSMUSP00000015511,10090.ENSMUSP00000017629,10090.ENSMUSP00000018353,10090.ENSMUSP00000018476,10090.ENSMUSP00000018700…	Flot1,Rab8a,Stk11,Grcc10,Map2k1,App,Igf1r,Epha2,Ctnnb1,Rhoa,Pten,Plxnd1,Top2b,Stk4,Stk3,Dlg4,Map1s,Egfr,Dbnl,Rock2,Rab10,Pafah1b1,Evl,Dbn1,Emb,Vcl,Clu,Dpysl2,Nefl,Rpl24,Alcam,Gsk3b,Hcls1,Hsp90ab1,Kif5b,Impact,Smad4,Afg3l2,Farp1,Hprt,Nrp1,Prex2,Als2,Epha4,Plxna2,Kif5c,Notch1,Nckap1,Sh3gl2,Dock7,Stmn1,Cdk5,Uchl1,Tmem106b,Wasl,Atg7,Vasp,Cyfip1,Pak1,Ilk,Nek3,Gpm6a,Nckap1l,Rac2,Nexn,Spg11,Shtn1,Sema7a…
GO:0098660	Inorganic ion transmembrane transport	181	0.293723	top	3.22e-05	ks	10090.ENSMUSP00000000090,10090.ENSMUSP00000000199,10090.ENSMUSP00000000619,10090.ENSMUSP00000004396,10090.ENSMUSP00000004774,10090.ENSMUSP00000005431,10090.ENSMUSP00000005493,10090.ENSMUSP00000006435,10090.ENSMUSP00000006749,10090.ENSMUSP00000007257,10090.ENSMUSP00000010804,10090.ENSMUSP00000013304,10090.ENSMUSP00000014457,10090.ENSMUSP00000014920,10090.ENSMUSP00000015934,10090.ENSMUSP00000016396…	Cox5a,Ncs1,Clcn4-2,Atp6v1f,Aqp1,Letm1,Slc1a3,Atp6v1b2,Slc4a1,Clic1,Plcd1,Atp6v0d1,Cox6c,Nol3,Surf1,Atp5e,Slc12a7,Trpv2,Slc2a4,Atp6ap1,Atp6v1e1,Atp2b1,Mcu,Atp2a3,Atp6v1d,Mrs2,Mcur1,Ero1l,Atp6v1c1,Slc38a2,Cyc1,Tfrc,Atp5j,Clic6,Atp5o,Rhag,Clic5,Atp6v0c,Slc39a7,Afg3l2,Slc1a1,Plcb3,Atp5b,Atp5a1,Ccdc51,Slc25a10,Maip1,Slc39a10,Slc40a1,Xpr1,Atp1b1,Slc25a25,Itgav,Slc12a6,Snap25,Slc23a2,Anxa5,Slc33a1,Ccdc1…
GO:0045921	Positive regulation of exocytosis	53	1.38606	top	3.61e-05	ks	10090.ENSMUSP00000000199,10090.ENSMUSP00000000299,10090.ENSMUSP00000005509,10090.ENSMUSP00000005711,10090.ENSMUSP00000006217,10090.ENSMUSP00000007803,10090.ENSMUSP00000014546,10090.ENSMUSP00000017975,10090.ENSMUSP00000019231,10090.ENSMUSP00000022082,10090.ENSMUSP00000023502,10090.ENSMUSP00000026900,10090.ENSMUSP00000029912,10090.ENSMUSP00000030814,10090.ENSMUSP00000033075,10090.ENSMUSP00000033608…	Ncs1,Itgb2,Stx1a,Chmp2a,Snf8,Bcl2l1,Tsg101,Rab5a,Atp6ap1,Glrx,Snx4,Hgs,Sdcbp,Cdk5,Stx4a,Sytl4,Lamp1,Vps4a,Rab27a,Fgg,Fgb,Vamp7,Vamp8,Prkca,Cadps,Itgam,Vsnl1,Erc1,Stxbp1,Ap1g1,Vps4b,Sept5,Exoc2,Stam,Syt1,Unc13b,Rab3a,Pdcd6ip,Rab7,Snca,Dnm1l,Syt2,Rab3d,Syk,Rab27b,Stxbp5,Rab9,Prrt2,Stxbp2,Syt7,Clasp2,Fga,Clasp1
GO:0034114	Regulation of heterotypic cell-cell adhesion	11	2.84079	top	3.73e-05	afc	10090.ENSMUSP00000001569,10090.ENSMUSP00000023593,10090.ENSMUSP00000034588,10090.ENSMUSP00000037018,10090.ENSMUSP00000039472,10090.ENSMUSP00000046185,10090.ENSMUSP00000063001,10090.ENSMUSP00000103245,10090.ENSMUSP00000110489,10090.ENSMUSP00000131318,10090.ENSMUSP00000133117	Flot1,Adipoq,Apoa1,Fgg,Fgb,Mbp,Wnk1,Klf4,Thy1,Myadm,Fga
GO:0120039	Plasma membrane bounded cell projection morphogenesis	184	0.501205	top	3.93e-05	ks	10090.ENSMUSP00000001569,10090.ENSMUSP00000003121,10090.ENSMUSP00000003152,10090.ENSMUSP00000004389,10090.ENSMUSP00000005066,10090.ENSMUSP00000005406,10090.ENSMUSP00000005671,10090.ENSMUSP00000006614,10090.ENSMUSP00000007130,10090.ENSMUSP00000007959,10090.ENSMUSP00000013807,10090.ENSMUSP00000015511,10090.ENSMUSP00000017629,10090.ENSMUSP00000018353,10090.ENSMUSP00000018476,10090.ENSMUSP00000018700…	Flot1,Rab8a,Stk11,Grcc10,Map2k1,App,Igf1r,Epha2,Ctnnb1,Rhoa,Pten,Plxnd1,Top2b,Stk4,Stk3,Dlg4,Map1s,Egfr,Dbnl,Rock2,Rab10,Pafah1b1,Evl,Dbn1,Emb,Vcl,Clu,Dpysl2,Nefl,Rpl24,Alcam,Gsk3b,Hcls1,Hsp90ab1,Kif5b,Impact,Smad4,Afg3l2,Farp1,Hprt,Nrp1,Prex2,Als2,Epha4,Plxna2,Kif5c,Notch1,Nckap1,Sh3gl2,Dock7,Stmn1,Cdk5,Uchl1,Tmem106b,Wasl,Atg7,Vasp,Cyfip1,Pak1,Ilk,Nek3,Gpm6a,Snx1,Nckap1l,Rac2,Nexn,Spg11,Snx2,Sh…
GO:0042391	Regulation of membrane potential	132	0.508299	top	4.77e-05	ks	10090.ENSMUSP00000000329,10090.ENSMUSP00000001592,10090.ENSMUSP00000001780,10090.ENSMUSP00000002084,10090.ENSMUSP00000003268,10090.ENSMUSP00000005234,10090.ENSMUSP00000005406,10090.ENSMUSP00000005509,10090.ENSMUSP00000007012,10090.ENSMUSP00000007257,10090.ENSMUSP00000007799,10090.ENSMUSP00000007803,10090.ENSMUSP00000010198,10090.ENSMUSP00000013807,10090.ENSMUSP00000017458,10090.ENSMUSP00000018700…	Alox12,Jup,Akt1,Abcd1,Sh3gl1,Wdr1,App,Stx1a,Sod2,Clic1,Cav1,Bcl2l1,Tusc2,Pten,Mpp2,Dlg4,Ywhah,Gnb2l1,Dbn1,Glrx,Ndufs4,Bnip3l,Gsk3b,Sod1,Ehd3,Kif5b,Bin1,Gnaq,Adrbk1,Bad,Prdx3,Got1,Mgea5,Baiap2,Eif4a3,Ndufs1,Parp1,Atp1b1,Snta1,Src,Casq2,Ppa2,Gclm,Vcp,Stoml2,Slc9a1,Park7,Cdk5,Atp2a2,P2rx4,Ndufc2,Bax,Flna,Mecp2,Cbln1,Mtmr2,Nedd4,Gclc,Atp1b3,Syne1,Atp1a1,Trpm4,Shtn1,Arl6ip5,Rab3gap1,Gna11,Ank2,Akap9,A…
GO:0045907	Positive regulation of vasoconstriction	19	1.99869	top	5.73e-05	afc	10090.ENSMUSP00000001780,10090.ENSMUSP00000003017,10090.ENSMUSP00000007799,10090.ENSMUSP00000007959,10090.ENSMUSP00000020329,10090.ENSMUSP00000025791,10090.ENSMUSP00000026795,10090.ENSMUSP00000030964,10090.ENSMUSP00000037018,10090.ENSMUSP00000039472,10090.ENSMUSP00000040367,10090.ENSMUSP00000059977,10090.ENSMUSP00000064536,10090.ENSMUSP00000069011,10090.ENSMUSP00000083587,10090.ENSMUSP00000091940…	Akt1,Tbxas1,Cav1,Rhoa,Egfr,Adrbk1,Alox5,Cd38,Fgg,Fgb,Trpm4,Ptgs1,Gja1,Pde5a,Icam1,Shc1,Tbxa2r,Add3,Fga
GO:0099504	Synaptic vesicle cycle	73	0.713364	top	5.73e-05	ks	10090.ENSMUSP00000002603,10090.ENSMUSP00000003268,10090.ENSMUSP00000003345,10090.ENSMUSP00000003961,10090.ENSMUSP00000005509,10090.ENSMUSP00000005606,10090.ENSMUSP00000006181,10090.ENSMUSP00000007130,10090.ENSMUSP00000007216,10090.ENSMUSP00000007803,10090.ENSMUSP00000009538,10090.ENSMUSP00000010038,10090.ENSMUSP00000017975,10090.ENSMUSP00000020420,10090.ENSMUSP00000020637,10090.ENSMUSP00000021273…	Scrib,Sh3gl1,Amph,Ppfia3,Stx1a,Prkaca,Napa,Ctnnb1,Ap2m1,Bcl2l1,Syn2,Snap47,Rab5a,Ap3d1,Canx,Vamp2,Ap3b1,Snap29,Bin1,Cplx2,Snap25,Napb,Sh3gl2,Cdk5,Stx2,Vamp1,Stx4a,Ophn1,Sv2a,Cplx1,Fcho2,Sncb,Syde1,Pacsin1,Grn,Picalm,Lrrk2,Itsn2,Arf6,Dnm3,Cadps,Ston1,Syp,Erc1,Slc17a7,Erc2,Dnm1,Stxbp1,Snap91,Actb,Psen1,Cltc,Syt1,Stx1b,Unc13b,Rab3a,Ap1s2,Itsn1,Snca,Syn1,Dnm1l,Snap23,Syt2,Synj1,Rab27b,Snapin,Stxbp5,P…
GO:0031589	Cell-substrate adhesion	84	1.19899	top	7.19e-05	ks	10090.ENSMUSP00000000129,10090.ENSMUSP00000000299,10090.ENSMUSP00000002885,10090.ENSMUSP00000002979,10090.ENSMUSP00000003061,10090.ENSMUSP00000005532,10090.ENSMUSP00000007130,10090.ENSMUSP00000007959,10090.ENSMUSP00000014505,10090.ENSMUSP00000015791,10090.ENSMUSP00000016638,10090.ENSMUSP00000017488,10090.ENSMUSP00000020078,10090.ENSMUSP00000020204,10090.ENSMUSP00000021028,10090.ENSMUSP00000021554…	Fer,Itgb2,Epdr1,Lamb1,Bcam,Nid1,Ctnnb1,Rhoa,Mertk,Lama5,Cd34,Vtn,Lims1,Ntn4,Itgb3,Actn1,Nid2,Sorbs3,Parvb,Parvg,Itga5,Itgb8,Nrp1,Lamc1,Itga8,Lamc3,Itgav,Itga6,Src,Vcam1,Vamp3,Cdk5,Coro1a,Parva,Ilk,Arhgap6,Dlc1,Jam3,Fgg,Fermt3,Fgb,Fndc3b,Coro2b,Fermt2,Prkx,Atp1b2,Itga2,Fn1,Ston1,Tgfb1i1,Lamb2,Itgb5,Rcc2,Itga1,Emp2,Ttyh1,Rac1,Pecam1,Rpl29,Adam9,Pxn,Col3a1,Itgb1,Srgap2,Cttn,Itga2b,Tek,L1cam,Cd63,Itg…
GO:0046942	Carboxylic acid transport	90	0.622075	both ends	7.19e-05	ks	10090.ENSMUSP00000001963,10090.ENSMUSP00000002084,10090.ENSMUSP00000003622,10090.ENSMUSP00000003717,10090.ENSMUSP00000003720,10090.ENSMUSP00000005493,10090.ENSMUSP00000014750,10090.ENSMUSP00000015256,10090.ENSMUSP00000019226,10090.ENSMUSP00000019577,10090.ENSMUSP00000021077,10090.ENSMUSP00000021930,10090.ENSMUSP00000022242,10090.ENSMUSP00000022908,10090.ENSMUSP00000023099,10090.ENSMUSP00000025561…	Ace,Abcd1,Slc25a1,Abcb4,Crot,Slc1a3,Slc25a11,Slc25a13,Slc25a22,Gipc1,Slc9a3r1,Sfxn1,Emb,Slc25a32,Slc38a2,Anxa1,Apba1,Slc1a1,Slc25a10,Mpc2,Slc23a2,Fabp4,Slc16a4,Abcd3,Slc6a9,Mfsd2a,Abcg2,Slc6a6,Slco1c1,Slc6a11,Slc6a1,Slco2b1,Pak1,Slc38a5,Acsl4,Slc25a15,Acsl1,Got2,Slc27a1,Myo6,Slco1a1,Slc16a2,Arl6ip5,Slc7a5,Sfxn5,Pnpla8,Slc16a1,Acsl3,Acsl5,Slc7a1,Slc6a20a,Kcnj10,Sfxn3,Ceacam2,Gja1,Fabp1,Lrrc8c,Fabp…
GO:0051924	Regulation of calcium ion transport	92	0.508618	top	7.19e-05	ks	10090.ENSMUSP00000001963,10090.ENSMUSP00000002678,10090.ENSMUSP00000002765,10090.ENSMUSP00000004137,10090.ENSMUSP00000004327,10090.ENSMUSP00000006286,10090.ENSMUSP00000007130,10090.ENSMUSP00000007799,10090.ENSMUSP00000007959,10090.ENSMUSP00000014920,10090.ENSMUSP00000017961,10090.ENSMUSP00000018651,10090.ENSMUSP00000020107,10090.ENSMUSP00000020608,10090.ENSMUSP00000021028,10090.ENSMUSP00000023538…	Ace,Tgfb1,Prkd1,Gstm7,G6pdx,Inpp5k,Ctnnb1,Cav1,Rhoa,Nol3,Jph2,Trpv2,Atp2b1,Ppp2ca,Itgb3,Mylk,Tmbim6,Rgn,Ehd3,Bin1,Diap1,Pdgfrb,Mgea5,Atp1b1,F2,Casq2,Slc9a1,Cdk5,Nos3,P2rx4,Itpr1,Coro1a,Bax,Stim1,Cask,Tmem66,Fkbp1a,Lyn,Slc30a1,Ank2,Atg5,Wfs1,Cacna2d1,Ubqln1,Efcab4a,Gnai2,Trpc6,S100a1,Adrb2,Gja1,Ywhae,Cxcl12,Gnb5,Asph,Htt,Hspa2,Plcg2,Dysf,Pml,Atp1a2,Gbas,Icam1,Slc8a1,Fmr1,Atp2b2,Sumo1,Pawr,Prkce,Fy…
GO:0010959	Regulation of metal ion transport	147	0.420348	top	7.66e-05	ks	10090.ENSMUSP00000000109,10090.ENSMUSP00000001780,10090.ENSMUSP00000001963,10090.ENSMUSP00000002678,10090.ENSMUSP00000002765,10090.ENSMUSP00000004137,10090.ENSMUSP00000004327,10090.ENSMUSP00000006286,10090.ENSMUSP00000007130,10090.ENSMUSP00000007799,10090.ENSMUSP00000007959,10090.ENSMUSP00000013807,10090.ENSMUSP00000014221,10090.ENSMUSP00000014920,10090.ENSMUSP00000017961,10090.ENSMUSP00000018651…	Cntn1,Akt1,Ace,Tgfb1,Prkd1,Gstm7,G6pdx,Inpp5k,Ctnnb1,Cav1,Rhoa,Pten,Chp1,Nol3,Jph2,Trpv2,Ywhah,Atp2b1,Ppp2ca,Itgb3,Slc9a3r1,Vamp2,Glrx,Mylk,Tmbim6,Rgn,Ehd3,Kif5b,Bin1,Diap1,Pdgfrb,Gnaq,Mgea5,Iscu,Serpine2,Atp1b1,Stom,F2,Snta1,Casq2,Ahcyl1,Slc9a1,Cdk5,Nos3,Tesc,P2rx4,Kel,Itpr1,Coro1a,Bax,Stim1,Cask,Flna,Tmem66,Ikbkb,Nedd4,Atp1b3,Trf,Fkbp1a,Lyn,Atp1a1,Mif,Oxsr1,Slc30a1,Ank2,Atg5,Akap9,Atp1b2,Wfs1,C…
GO:1902600	Proton transmembrane transport	60	0.422261	top	8.32e-05	ks	10090.ENSMUSP00000000090,10090.ENSMUSP00000000619,10090.ENSMUSP00000004396,10090.ENSMUSP00000005431,10090.ENSMUSP00000006435,10090.ENSMUSP00000013304,10090.ENSMUSP00000014457,10090.ENSMUSP00000015934,10090.ENSMUSP00000016396,10090.ENSMUSP00000018710,10090.ENSMUSP00000019231,10090.ENSMUSP00000019354,10090.ENSMUSP00000021142,10090.ENSMUSP00000021536,10090.ENSMUSP00000022904,10090.ENSMUSP00000023210…	Cox5a,Clcn4-2,Atp6v1f,Letm1,Atp6v1b2,Atp6v0d1,Cox6c,Surf1,Atp5e,Slc2a4,Atp6ap1,Atp6v1e1,Atp2a3,Atp6v1d,Atp6v1c1,Cyc1,Atp5j,Atp5o,Atp6v0c,Atp5b,Atp5a1,Slc33a1,Stoml2,Slc9a1,Atp2a2,Ndufa4,Cox4i1,Cox7a2,Atp2c1,Atp1a1,Atp6v0a2,Atp6v1h,Cox15,Ndufa4l2,Atp6v0a1,Cox6a1,Atp6v1g1,Atp5k,Atp6v1g2,mt-Co1,mt-Co2,mt-Nd4,mt-Nd5,Slc17a7,Atp1a2,Slc4a10,Atp1a3,Ndufs7,Atp5d,Atp5h,Atp5g1,Slc36a1,Cox4i2,Atp1a4,Atp6v1a…
GO:0003012	Muscle system process	75	0.467894	top	8.71e-05	ks	10090.ENSMUSP00000003575,10090.ENSMUSP00000006626,10090.ENSMUSP00000014080,10090.ENSMUSP00000018748,10090.ENSMUSP00000018800,10090.ENSMUSP00000019076,10090.ENSMUSP00000020904,10090.ENSMUSP00000020949,10090.ENSMUSP00000021610,10090.ENSMUSP00000022097,10090.ENSMUSP00000023507,10090.ENSMUSP00000023538,10090.ENSMUSP00000023707,10090.ENSMUSP00000025791,10090.ENSMUSP00000027863,10090.ENSMUSP00000028239…	Tpm4,Actn3,Myl2,Tbx3,Myl4,Map2k3,Rock2,Map2k6,Chga,Ndufs6,Gsk3b,Mylk,Sod1,Adrbk1,Atp1b1,Gsn,Gatm,Snta1,Casq2,Pdlim5,Tpm2,Slc9a1,Nos3,Cd38,Atp2a2,P2rx4,Fkbp1a,Map2k4,Rcsd1,Ank2,Inpp5f,Eef2,Tbce,Acta2,Gucy1a3,Cacna2d1,Ppp3ca,Lmod1,Adrb2,Dlg1,Pde5a,Tmod3,Prkg1,Synm,Npm1,Col4a3bp,Slc8a1,Aldoa,Myh11,Hsp90aa1,Tmod2,Mtor,Nos1,Atp1a3,Gaa,Camk2d,Tmod1,Myh14,Smad5,Tpm1,Dmd,Pde4d,Tpm3,Mrvi1,Gpd1l,Myh1,Akap1…
GO:0050808	Synapse organization	128	0.61766	top	8.74e-05	ks	10090.ENSMUSP00000001548,10090.ENSMUSP00000003961,10090.ENSMUSP00000004673,10090.ENSMUSP00000005256,10090.ENSMUSP00000005406,10090.ENSMUSP00000005671,10090.ENSMUSP00000006293,10090.ENSMUSP00000007130,10090.ENSMUSP00000013807,10090.ENSMUSP00000015511,10090.ENSMUSP00000015800,10090.ENSMUSP00000016143,10090.ENSMUSP00000017458,10090.ENSMUSP00000018437,10090.ENSMUSP00000018700,10090.ENSMUSP00000020769…	Itga3,Ppfia3,Ndrg2,Ndrg1,App,Igf1r,Crkl,Ctnnb1,Pten,Plxnd1,Hspa8,Wasf3,Mpp2,Pfn1,Dlg4,Dbnl,Rock2,Actn1,Lgmn,Dbn1,Nefl,Hcls1,Sncg,Cdh2,Afg3l2,Baiap2,Farp1,Nrp1,Als2,Epha4,Itpka,Snta1,Sdcbp,Cdk5,Rer1,Sparcl1,Wasl,Add2,Slc6a1,Cyfip1,Pak1,Gpc4,Pls3,Ophn1,Flna,Mecp2,Col4a1,Gpm6a,Cbln1,Vps35,Mtmr2,Gnpat,Pin1,Nedd4,Tanc1,Myo6,Git1,Palm,Ina,Sncb,Plxnb2,Actbl2,Lrrk2,Slc25a46,Dnaja3,Erbb2,Cdc42,Arf6,Abi2,C…
GO:0006820	Anion transport	168	0.483962	both ends	0.00014	ks	10090.ENSMUSP00000000619,10090.ENSMUSP00000001109,10090.ENSMUSP00000001963,10090.ENSMUSP00000002084,10090.ENSMUSP00000003622,10090.ENSMUSP00000003717,10090.ENSMUSP00000003720,10090.ENSMUSP00000005493,10090.ENSMUSP00000006749,10090.ENSMUSP00000007257,10090.ENSMUSP00000010251,10090.ENSMUSP00000012028,10090.ENSMUSP00000014750,10090.ENSMUSP00000015256,10090.ENSMUSP00000016463,10090.ENSMUSP00000017900…	Clcn4-2,Mfsd10,Ace,Abcd1,Slc25a1,Abcb4,Crot,Slc1a3,Slc4a1,Clic1,Slc22a8,Gltp,Slc25a11,Slc25a13,Slc25a5,Slc12a7,Slc25a22,Gipc1,Slc9a3r1,Sfxn1,Emb,Vdac2,Slc25a32,Slc38a2,Clic6,Clic5,Anxa1,Apba1,Slc1a1,Slc25a10,Xpr1,Mpc2,Slc25a25,Slc12a6,Slc23a2,Fabp4,Slc33a1,Slc25a24,Slc16a4,Gpr89,Abcd3,Slc35a1,Slc6a9,Scp2,Slc2a1,Mfsd2a,Slc9a1,Scarb2,Triap1,Abcg2,Pcyox1,Slc6a6,Slco1c1,Slc6a11,Slc6a1,Slc2a3,Slco2b1,…
GO:0050806	Positive regulation of synaptic transmission	67	0.660946	top	0.00014	ks	10090.ENSMUSP00000000199,10090.ENSMUSP00000001569,10090.ENSMUSP00000005406,10090.ENSMUSP00000005493,10090.ENSMUSP00000005509,10090.ENSMUSP00000007803,10090.ENSMUSP00000010038,10090.ENSMUSP00000013807,10090.ENSMUSP00000017458,10090.ENSMUSP00000018700,10090.ENSMUSP00000020329,10090.ENSMUSP00000021273,10090.ENSMUSP00000021607,10090.ENSMUSP00000021950,10090.ENSMUSP00000023507,10090.ENSMUSP00000025083…	Ncs1,Flot1,App,Slc1a3,Stx1a,Bcl2l1,Snap47,Pten,Mpp2,Dlg4,Egfr,Vamp2,Lgmn,Dbn1,Gsk3b,Kif5b,Adrbk1,Baiap2,Serpine2,Snap25,Car2,Cdk5,Stx4a,Mecp2,Clstn1,Itpr3,Hnrnpk,Rab3gap1,Syde1,S100b,Car7,Adrb2,Abat,Gfap,Mapk1,Nrgn,Dtnbp1,Erc1,Nptn,Glul,Lgi1,Fmr1,Stxbp1,Lama2,Prkce,Psen1,Ptn,Nos1,Sqstm1,Syt1,Stx1b,Unc13b,Arrb2,Shank3,Camk2b,Ptk2,Tnr,Snca,Dnm1l,Syt2,Dbi,Mllt4,Prrt2,Tbc1d24,Syt7,Slc8a2,Creb1
GO:1903522	Regulation of blood circulation	77	0.96087	top	0.00014	ks	10090.ENSMUSP00000001592,10090.ENSMUSP00000001780,10090.ENSMUSP00000003017,10090.ENSMUSP00000005066,10090.ENSMUSP00000005406,10090.ENSMUSP00000007799,10090.ENSMUSP00000007959,10090.ENSMUSP00000014080,10090.ENSMUSP00000017841,10090.ENSMUSP00000018800,10090.ENSMUSP00000020107,10090.ENSMUSP00000020329,10090.ENSMUSP00000020721,10090.ENSMUSP00000021610,10090.ENSMUSP00000023608,10090.ENSMUSP00000024860…	Jup,Akt1,Tbxas1,Map2k1,App,Cav1,Rhoa,Myl2,Ada,Myl4,Atp2b1,Egfr,Smtn,Chga,Atp5j,Ehd3,Bin1,Adrbk1,Slc1a1,Alox5,Atp1b1,Snta1,Casq2,Slc9a1,Nos3,Cd38,Atp2a2,P2rx4,Flna,Dock5,Fgg,Fgb,Atp1a1,Trpm4,Ank2,Dock4,Pebp1,Cacna2d1,Zmpste24,Pik3r1,S100a1,Ptgs1,Adrb2,Prkca,Dlg1,Gja1,Glrx3,Pde5a,Gsk3a,Tmem65,Prkg1,Atp1a2,Icam1,Slc8a1,Bmpr2,Abcc9,Sumo1,Arhgap42,Hsp90aa1,Shc1,Nos1,Tbxa2r,Ctnna3,Gaa,Add3,Ace2,Tpm1,Dm…
GO:0015711	Organic anion transport	143	0.509257	both ends	0.00016	ks	10090.ENSMUSP00000001109,10090.ENSMUSP00000001963,10090.ENSMUSP00000002084,10090.ENSMUSP00000003622,10090.ENSMUSP00000003717,10090.ENSMUSP00000003720,10090.ENSMUSP00000005493,10090.ENSMUSP00000006749,10090.ENSMUSP00000010251,10090.ENSMUSP00000012028,10090.ENSMUSP00000014750,10090.ENSMUSP00000015256,10090.ENSMUSP00000016463,10090.ENSMUSP00000019226,10090.ENSMUSP00000019577,10090.ENSMUSP00000021077…	Mfsd10,Ace,Abcd1,Slc25a1,Abcb4,Crot,Slc1a3,Slc4a1,Slc22a8,Gltp,Slc25a11,Slc25a13,Slc25a5,Slc25a22,Gipc1,Slc9a3r1,Sfxn1,Emb,Slc25a32,Slc38a2,Anxa1,Apba1,Slc1a1,Slc25a10,Mpc2,Slc25a25,Slc23a2,Fabp4,Slc33a1,Slc25a24,Slc16a4,Abcd3,Slc35a1,Slc6a9,Scp2,Slc2a1,Mfsd2a,Scarb2,Triap1,Abcg2,Slc6a6,Slco1c1,Slc6a11,Slc6a1,Slc2a3,Slco2b1,Pak1,Slc38a5,Acsl4,Slc25a15,Acsl1,Slc25a4,Got2,Slc27a1,Apoa4,Apoa1,Ldlr,T…
GO:0015980	Energy derivation by oxidation of organic compounds	115	0.283557	top	0.00016	ks	10090.ENSMUSP00000000090,10090.ENSMUSP00000000985,10090.ENSMUSP00000001780,10090.ENSMUSP00000003461,10090.ENSMUSP00000003964,10090.ENSMUSP00000005493,10090.ENSMUSP00000005826,10090.ENSMUSP00000007012,10090.ENSMUSP00000010007,10090.ENSMUSP00000013737,10090.ENSMUSP00000014698,10090.ENSMUSP00000015100,10090.ENSMUSP00000015256,10090.ENSMUSP00000019226,10090.ENSMUSP00000019323,10090.ENSMUSP00000021993…	Cox5a,Oxa1l,Akt1,Ogdh,Gys1,Slc1a3,Cs,Sod2,Sdhb,Ndufs2,Dguok,Ppp1cb,Slc25a13,Slc25a22,Mdh2,Uqcrb,Sdha,Ndufs6,Pdhb,Ndufs4,Ndufb9,Adsl,Aco2,Cyc1,Gsk3b,Gpd1,Ndufa5,Ndufb8,Bloc1s1,Uqcrc1,Ndufs1,Ndufa10,Fh1,Slc25a25,Cat,Ndufaf1,Etfdh,Prkag2,Ndufc2,Bax,Pdha1,Mecp2,Mt3,Coq9,Cox4i1,Dlat,Pygb,Lace1,Ppp1ca,Ndufa7,Aifm1,Ndufv1,Mybbp1a,Uqcrfs1,Pygm,Cox6a1,S100b,Ndufv3,Ptges3,Phkb,Uqcrq,Uqcr10,Idh3g,Coa6,Pfkm,…
GO:0098656	Anion transmembrane transport	107	0.655873	both ends	0.00016	ks	10090.ENSMUSP00000000619,10090.ENSMUSP00000001109,10090.ENSMUSP00000002084,10090.ENSMUSP00000003622,10090.ENSMUSP00000005493,10090.ENSMUSP00000006749,10090.ENSMUSP00000007257,10090.ENSMUSP00000010251,10090.ENSMUSP00000014750,10090.ENSMUSP00000015256,10090.ENSMUSP00000016463,10090.ENSMUSP00000017900,10090.ENSMUSP00000019226,10090.ENSMUSP00000021077,10090.ENSMUSP00000021930,10090.ENSMUSP00000022242…	Clcn4-2,Mfsd10,Abcd1,Slc25a1,Slc1a3,Slc4a1,Clic1,Slc22a8,Slc25a11,Slc25a13,Slc25a5,Slc12a7,Slc25a22,Slc9a3r1,Sfxn1,Emb,Vdac2,Slc25a32,Slc38a2,Clic6,Clic5,Slc1a1,Slc25a10,Xpr1,Mpc2,Slc25a25,Slc12a6,Slc23a2,Slc33a1,Slc25a24,Slc16a4,Gpr89,Abcd3,Slc35a1,Slc6a9,Slc2a1,Mfsd2a,Slc9a1,Abcg2,Pcyox1,Slc6a6,Slco1c1,Slc6a11,Slc6a1,Slc2a3,Slco2b1,Slc38a5,Slc25a15,Slc25a4,Slc27a1,Clcn7,Slco1a1,Slc16a2,Ttyh2,Sl…
GO:1905039	Carboxylic acid transmembrane transport	62	0.788019	both ends	0.00017	ks	10090.ENSMUSP00000002084,10090.ENSMUSP00000003622,10090.ENSMUSP00000005493,10090.ENSMUSP00000014750,10090.ENSMUSP00000015256,10090.ENSMUSP00000019226,10090.ENSMUSP00000021077,10090.ENSMUSP00000021930,10090.ENSMUSP00000022242,10090.ENSMUSP00000022908,10090.ENSMUSP00000023099,10090.ENSMUSP00000025875,10090.ENSMUSP00000026899,10090.ENSMUSP00000027853,10090.ENSMUSP00000028815,10090.ENSMUSP00000029502…	Abcd1,Slc25a1,Slc1a3,Slc25a11,Slc25a13,Slc25a22,Slc9a3r1,Sfxn1,Emb,Slc25a32,Slc38a2,Slc1a1,Slc25a10,Mpc2,Slc23a2,Slc16a4,Abcd3,Slc6a9,Mfsd2a,Abcg2,Slc6a6,Slco1c1,Slc6a11,Slc6a1,Slco2b1,Slc38a5,Slc25a15,Slc27a1,Slco1a1,Slc16a2,Arl6ip5,Slc7a5,Sfxn5,Slc16a1,Slc7a1,Slc6a20a,Kcnj10,Sfxn3,Ceacam2,Lrrc8c,Slc1a2,Slc17a7,Lrrc8a,Ceacam1,Slc7a2,Abcc1,Slc38a10,Abcb11,Slc19a1,Folr1,Slc1a5,Slc36a1,Slc1a4,Slc43…
GO:0048167	Regulation of synaptic plasticity	87	0.648043	top	0.0003	ks	10090.ENSMUSP00000003121,10090.ENSMUSP00000003550,10090.ENSMUSP00000003754,10090.ENSMUSP00000003961,10090.ENSMUSP00000005406,10090.ENSMUSP00000007803,10090.ENSMUSP00000010038,10090.ENSMUSP00000013807,10090.ENSMUSP00000017458,10090.ENSMUSP00000017975,10090.ENSMUSP00000018700,10090.ENSMUSP00000019577,10090.ENSMUSP00000020288,10090.ENSMUSP00000021273,10090.ENSMUSP00000021607,10090.ENSMUSP00000021684…	Rab8a,Ncstn,Calb2,Ppfia3,App,Bcl2l1,Snap47,Pten,Mpp2,Rab5a,Dlg4,Gipc1,Eif4ebp2,Vamp2,Lgmn,Cyp46a1,Dbn1,Gsk3b,Baiap2,Hras,Cplx2,Epha4,Serpine2,Fcgr2b,Snap25,Itpka,Calb1,Ncdn,Cdk5,Cd38,Kras,Pak1,Stx4a,Mecp2,Cbln1,Myo6,Spg11,Ythdf1,Itpr3,Hnrnpk,Rab3gap1,Fam107a,S100b,Ywhag,Kcnj10,Gfap,Mapk1,Map1b,Syp,Nrgn,Nf1,Htt,Rac1,Syngap1,Nptn,Fmr1,Atp2b2,Stxbp1,Map1a,Synpo,Nr3c1,Mapt,Psen1,Ptn,Nos1,Slc4a10,Sqst…
GO:1903169	Regulation of calcium ion transmembrane transport	56	0.691651	top	0.00031	ks	10090.ENSMUSP00000002678,10090.ENSMUSP00000002765,10090.ENSMUSP00000004137,10090.ENSMUSP00000004327,10090.ENSMUSP00000014920,10090.ENSMUSP00000017961,10090.ENSMUSP00000020608,10090.ENSMUSP00000021028,10090.ENSMUSP00000023832,10090.ENSMUSP00000024860,10090.ENSMUSP00000025239,10090.ENSMUSP00000025337,10090.ENSMUSP00000027863,10090.ENSMUSP00000028681,10090.ENSMUSP00000029454,10090.ENSMUSP00000030669…	Tgfb1,Prkd1,Gstm7,G6pdx,Nol3,Jph2,Ppp2ca,Itgb3,Rgn,Ehd3,Bin1,Diap1,Atp1b1,F2,Casq2,Slc9a1,Cdk5,Coro1a,Bax,Stim1,Fkbp1a,Lyn,Ank2,Atg5,Cacna2d1,Ubqln1,S100a1,Adrb2,Ywhae,Gnb5,Asph,Htt,Hspa2,Plcg2,Dysf,Atp1a2,Gbas,Slc8a1,Fmr1,Sumo1,Prkce,Fyn,Plcg1,Sestd1,Camk2d,Dmd,Snca,Thy1,Hpca,Pde4d,Stim2,Dbi,Myo5a,Rapgef3,Sri,Ptpn6
GO:1904062	Regulation of cation transmembrane transport	117	0.513044	top	0.00033	ks	10090.ENSMUSP00000002048,10090.ENSMUSP00000002678,10090.ENSMUSP00000002765,10090.ENSMUSP00000004137,10090.ENSMUSP00000004327,10090.ENSMUSP00000004375,10090.ENSMUSP00000005406,10090.ENSMUSP00000007799,10090.ENSMUSP00000013807,10090.ENSMUSP00000014221,10090.ENSMUSP00000014920,10090.ENSMUSP00000015667,10090.ENSMUSP00000017961,10090.ENSMUSP00000018700,10090.ENSMUSP00000019109,10090.ENSMUSP00000020608…	Taco1,Tgfb1,Prkd1,Gstm7,G6pdx,Phb2,App,Cav1,Pten,Chp1,Nol3,Ctss,Jph2,Dlg4,Ywhah,Ppp2ca,Itgb3,Slc9a3r1,Vamp2,Glrx,Ppif,Rgn,Ehd3,Kif5b,Bin1,Diap1,Alox5,Iscu,Atp1b1,Stom,F2,Snta1,Casq2,Slc9a1,Park7,Cdk5,Tesc,Kel,Coro1a,Bax,Stim1,Flna,Ikbkb,Slc25a4,Nedd4,Atp1b3,Fkbp1a,Lyn,Oxsr1,Slc30a1,Ank2,Atg5,Akap9,Atp1b2,Cacna2d1,Ubqln1,Kcna1,S100a1,Atp7a,Adrb2,Wnk1,Dlg1,Ywhae,Ano6,Mink1,Prkg1,Gnb5,Asph,Rph3a,Htt…
GO:0099003	Vesicle-mediated transport in synapse	80	0.649312	top	0.00042	ks	10090.ENSMUSP00000002603,10090.ENSMUSP00000003121,10090.ENSMUSP00000003268,10090.ENSMUSP00000003345,10090.ENSMUSP00000003961,10090.ENSMUSP00000005509,10090.ENSMUSP00000005606,10090.ENSMUSP00000006181,10090.ENSMUSP00000007130,10090.ENSMUSP00000007216,10090.ENSMUSP00000007803,10090.ENSMUSP00000009538,10090.ENSMUSP00000010038,10090.ENSMUSP00000017975,10090.ENSMUSP00000018875,10090.ENSMUSP00000020420…	Scrib,Rab8a,Sh3gl1,Amph,Ppfia3,Stx1a,Prkaca,Napa,Ctnnb1,Ap2m1,Bcl2l1,Syn2,Snap47,Rab5a,Ap2b1,Ap3d1,Canx,Vamp2,Ap3b1,Snap29,Bin1,Cplx2,Snap25,Napb,Sh3gl2,Cdk5,Stx2,Vamp1,Stx4a,Ophn1,Vps35,Myo6,Clstn1,Sv2a,Cplx1,Fcho2,Sncb,Syde1,Pacsin1,Grn,Picalm,Lrrk2,Itsn2,Arf6,Dnm3,Cadps,Ston1,Syp,Erc1,Slc17a7,Erc2,Dnm1,Stxbp1,Snap91,Actb,Psen1,Cltc,Eps15,Syt1,Stx1b,Unc13b,Rab3a,Ap1s2,Itsn1,Snca,Syn1,Dnm1l,Snap…
GO:0006119	Oxidative phosphorylation	62	0.368707	top	0.0006	ks	10090.ENSMUSP00000000090,10090.ENSMUSP00000013737,10090.ENSMUSP00000014457,10090.ENSMUSP00000014698,10090.ENSMUSP00000015934,10090.ENSMUSP00000016396,10090.ENSMUSP00000021993,10090.ENSMUSP00000022062,10090.ENSMUSP00000022097,10090.ENSMUSP00000022980,10090.ENSMUSP00000023210,10090.ENSMUSP00000023608,10090.ENSMUSP00000023677,10090.ENSMUSP00000024967,10090.ENSMUSP00000026222,10090.ENSMUSP00000026459…	Cox5a,Ndufs2,Cox6c,Dguok,Surf1,Atp5e,Uqcrb,Sdha,Ndufs6,Ndufb9,Cyc1,Atp5j,Atp5o,Msh2,Ndufb8,Atp5b,Atp5a1,Uqcrc1,Ndufs1,Ndufa10,Ndufaf1,Stoml2,Ndufc2,Mecp2,Coq9,Cox4i1,Cox7a2,Lace1,Ndufa7,Ndufv1,Uqcrfs1,Cox6a1,Ndufv3,Atp5k,Uqcrq,Uqcr10,Coa6,Ndufa8,Ndufs8,Cox6b1,Uqcrh,Fxn,mt-Nd2,mt-Co1,mt-Co2,mt-Nd4,mt-Nd5,Gbas,Ndufb6,Atp5d,Atp5h,Cox4i2,Dld,Sdhc,Snca,Atp5c1,Atp5f1,Cox7c,Ndufv2,Mtch2,Atp5j2,Ndufa12
GO:0045333	Cellular respiration	88	0.287471	top	0.00061	ks	10090.ENSMUSP00000000090,10090.ENSMUSP00000000985,10090.ENSMUSP00000003461,10090.ENSMUSP00000005493,10090.ENSMUSP00000005826,10090.ENSMUSP00000007012,10090.ENSMUSP00000010007,10090.ENSMUSP00000013737,10090.ENSMUSP00000014698,10090.ENSMUSP00000015256,10090.ENSMUSP00000019226,10090.ENSMUSP00000019323,10090.ENSMUSP00000021993,10090.ENSMUSP00000022062,10090.ENSMUSP00000022097,10090.ENSMUSP00000022268…	Cox5a,Oxa1l,Ogdh,Slc1a3,Cs,Sod2,Sdhb,Ndufs2,Dguok,Slc25a13,Slc25a22,Mdh2,Uqcrb,Sdha,Ndufs6,Pdhb,Ndufs4,Ndufb9,Adsl,Aco2,Cyc1,Gpd1,Ndufa5,Ndufb8,Bloc1s1,Uqcrc1,Ndufs1,Ndufa10,Fh1,Slc25a25,Cat,Ndufaf1,Etfdh,Ndufc2,Bax,Pdha1,Mecp2,Coq9,Cox4i1,Dlat,Lace1,Ndufa7,Aifm1,Ndufv1,Mybbp1a,Uqcrfs1,Cox6a1,Ndufv3,Uqcrq,Uqcr10,Idh3g,Coa6,Dlst,Suclg1,Ndufa8,Ndufs8,Uqcrh,Suclg2,Aifm2,Fxn,mt-Nd1,mt-Nd2,mt-Co1,mt-C…
GO:0006865	Amino acid transport	43	0.704912	both ends	0.00062	ks	10090.ENSMUSP00000005493,10090.ENSMUSP00000015256,10090.ENSMUSP00000019226,10090.ENSMUSP00000019577,10090.ENSMUSP00000021077,10090.ENSMUSP00000021930,10090.ENSMUSP00000023099,10090.ENSMUSP00000025830,10090.ENSMUSP00000025875,10090.ENSMUSP00000030269,10090.ENSMUSP00000032185,10090.ENSMUSP00000032451,10090.ENSMUSP00000032454,10090.ENSMUSP00000033040,10090.ENSMUSP00000033512,10090.ENSMUSP00000033871…	Slc1a3,Slc25a13,Slc25a22,Gipc1,Slc9a3r1,Sfxn1,Slc38a2,Apba1,Slc1a1,Slc6a9,Slc6a6,Slc6a11,Slc6a1,Pak1,Slc38a5,Slc25a15,Myo6,Arl6ip5,Slc7a5,Sfxn5,Slc7a1,Slc6a20a,Kcnj10,Sfxn3,Gja1,Lrrc8c,Nf1,Slc1a2,Slc17a7,Lrrc8a,Slc7a2,Slc38a10,Slc1a5,Slc36a1,Slc1a4,Slc43a1,Prkcd,Ace2,Slc25a18,Sfxn4,Slc25a12,Slc3a2,Slc38a3
GO:0043270	Positive regulation of ion transport	115	0.260545	top	0.0007	ks	10090.ENSMUSP00000000109,10090.ENSMUSP00000001780,10090.ENSMUSP00000002572,10090.ENSMUSP00000003717,10090.ENSMUSP00000004137,10090.ENSMUSP00000004327,10090.ENSMUSP00000007799,10090.ENSMUSP00000014221,10090.ENSMUSP00000015667,10090.ENSMUSP00000017961,10090.ENSMUSP00000018651,10090.ENSMUSP00000020107,10090.ENSMUSP00000020634,10090.ENSMUSP00000020949,10090.ENSMUSP00000021077,10090.ENSMUSP00000022082…	Cntn1,Akt1,Slc9a3r2,Abcb4,Gstm7,G6pdx,Cav1,Chp1,Ctss,Jph2,Trpv2,Atp2b1,Mapk9,Map2k6,Slc9a3r1,Glrx,Dpysl2,Snx4,Mylk,Rgn,Ehd3,Kif5b,Pdgfrb,Mgea5,Alox5,Atp1b1,F2,Ahcyl1,Slc9a1,Park7,Cdk5,Tesc,P2rx4,Triap1,Itpr1,Slc6a1,Arl6ip1,Bax,Stim1,Cask,Flna,Ikbkb,Slc25a4,Apoa1,Atp1b3,Mif,Abcb1a,Rab3gap1,Atp8a1,Ank2,Akap9,Acsl5,Atp1b2,Wfs1,Cacna2d1,Vamp7,Kcna1,Trpc6,S100a1,Atp7a,Vamp8,Adrb2,Pcp4,Wnk1,Abat,Dlg1,F…
GO:0007160	Cell-matrix adhesion	56	1.26203	top	0.00085	ks	10090.ENSMUSP00000000299,10090.ENSMUSP00000002885,10090.ENSMUSP00000003061,10090.ENSMUSP00000005532,10090.ENSMUSP00000007130,10090.ENSMUSP00000007959,10090.ENSMUSP00000016638,10090.ENSMUSP00000017488,10090.ENSMUSP00000020078,10090.ENSMUSP00000021028,10090.ENSMUSP00000021554,10090.ENSMUSP00000022340,10090.ENSMUSP00000026360,10090.ENSMUSP00000028106,10090.ENSMUSP00000028499,10090.ENSMUSP00000028522…	Itgb2,Epdr1,Bcam,Nid1,Ctnnb1,Rhoa,Cd34,Vtn,Lims1,Itgb3,Actn1,Nid2,Itgb8,Itga8,Itgav,Itga6,Src,Vcam1,Cdk5,Ilk,Arhgap6,Dlc1,Jam3,Fgg,Fermt3,Fgb,Coro2b,Fermt2,Itga2,Fn1,Ston1,Itgb5,Rcc2,Itga1,Emp2,Pecam1,Adam9,Pxn,Col3a1,Itgb1,Cttn,Itga2b,Tek,L1cam,Cd63,Itgb4,Tsc1,Peak1,Thy1,Taok2,Tiam1,Ptprk,Bcr,Zyx,Dag1,Fga
GO:0006937	Regulation of muscle contraction	56	0.528117	top	0.00089	ks	10090.ENSMUSP00000001592,10090.ENSMUSP00000004389,10090.ENSMUSP00000005066,10090.ENSMUSP00000006626,10090.ENSMUSP00000007799,10090.ENSMUSP00000007959,10090.ENSMUSP00000017841,10090.ENSMUSP00000020107,10090.ENSMUSP00000020721,10090.ENSMUSP00000021610,10090.ENSMUSP00000021950,10090.ENSMUSP00000023707,10090.ENSMUSP00000024860,10090.ENSMUSP00000025239,10090.ENSMUSP00000025791,10090.ENSMUSP00000027863…	Jup,Grcc10,Map2k1,Actn3,Cav1,Rhoa,Ada,Atp2b1,Smtn,Chga,Dbn1,Sod1,Ehd3,Bin1,Adrbk1,Atp1b1,Casq2,Slc9a1,Atp2a2,P2rx4,Flna,Dock5,Atp1a1,Trpm4,Ank2,Dock4,Gucy1a3,Itga2,Kcna1,Ptgs1,Adrb2,Prkca,Abat,Dlg1,Setd3,Pde5a,Prkg1,Calcrl,Atp1a2,Slc8a1,Sumo1,Arhgap42,Hsp90aa1,Shc1,Pawr,Cttn,Tbxa2r,Ctnna3,Anxa6,Ace2,Dmd,Pde4d,Mrvi1,Dsp,Sri,Agrn
GO:0031638	Zymogen activation	15	1.93267	top	0.00098	afc	10090.ENSMUSP00000000049,10090.ENSMUSP00000006508,10090.ENSMUSP00000020301,10090.ENSMUSP00000021607,10090.ENSMUSP00000025910,10090.ENSMUSP00000027189,10090.ENSMUSP00000033056,10090.ENSMUSP00000033941,10090.ENSMUSP00000034915,10090.ENSMUSP00000036861,10090.ENSMUSP00000037018,10090.ENSMUSP00000039472,10090.ENSMUSP00000077273,10090.ENSMUSP00000092951,10090.ENSMUSP00000133117	Apoh,Ggt1,Vsir,Lgmn,Bad,Casp8,Pycard,Plat,Ctsh,Tbc1d10a,Fgg,Fgb,Asph,Pawr,Fga
GO:0002181	Cytoplasmic translation	57	0.51012	bottom	0.0011	ks	10090.ENSMUSP00000000365,10090.ENSMUSP00000004072,10090.ENSMUSP00000004206,10090.ENSMUSP00000008036,10090.ENSMUSP00000017548,10090.ENSMUSP00000018568,10090.ENSMUSP00000019917,10090.ENSMUSP00000020741,10090.ENSMUSP00000022925,10090.ENSMUSP00000022960,10090.ENSMUSP00000023269,10090.ENSMUSP00000023599,10090.ENSMUSP00000023869,10090.ENSMUSP00000025218,10090.ENSMUSP00000025955,10090.ENSMUSP00000026420…	Mcts1,Rpl8,Eif3g,Rplp1,Rpl19,Drg2,Rwdd1,Drg1,Eif3h,Eif3e,Rpl24,Eif4a2,Denr,Etf1,Eif3a,Rps26,Hspa14,Eif3m,Rpl6,Eif3c,Eif3f,Rpsa,Dhx29,Eif3l,Rpl10a,Eif3j2,Rps23,Rpl18a,Rps21,Eif2s3x,Eif3k,Rpl26,Rpl17,Gspt1,Rpl15,Rpl36,Rpl29,Zc3h15,Rpl32,Rplp0,Rps2,Eif2s2,Eif3d,Eif3b,Rpl11,Eif3i,Rpl38,Rpl18,Rpl30,Rpl9,Rps28,Rpl35a,Rpl22,Eif5,Eif4a1,Tma7,Rpl31
GO:0016079	Synaptic vesicle exocytosis	33	0.772955	top	0.0011	ks	10090.ENSMUSP00000002603,10090.ENSMUSP00000003961,10090.ENSMUSP00000005509,10090.ENSMUSP00000005606,10090.ENSMUSP00000006181,10090.ENSMUSP00000010038,10090.ENSMUSP00000021273,10090.ENSMUSP00000023449,10090.ENSMUSP00000026985,10090.ENSMUSP00000028727,10090.ENSMUSP00000031378,10090.ENSMUSP00000032487,10090.ENSMUSP00000033075,10090.ENSMUSP00000037576,10090.ENSMUSP00000038502,10090.ENSMUSP00000043085…	Scrib,Ppfia3,Stx1a,Prkaca,Napa,Snap47,Vamp2,Snap29,Cplx2,Snap25,Stx2,Vamp1,Stx4a,Sv2a,Cplx1,Syde1,Cadps,Erc1,Erc2,Stxbp1,Psen1,Syt1,Stx1b,Unc13b,Rab3a,Snca,Snap23,Syt2,Synj1,Snapin,Prrt2,Syt7,Ctbp2
GO:0042773	ATP synthesis coupled electron transport	43	0.468324	top	0.0011	ks	10090.ENSMUSP00000000090,10090.ENSMUSP00000013737,10090.ENSMUSP00000014698,10090.ENSMUSP00000021993,10090.ENSMUSP00000022062,10090.ENSMUSP00000022097,10090.ENSMUSP00000022980,10090.ENSMUSP00000023210,10090.ENSMUSP00000026222,10090.ENSMUSP00000026743,10090.ENSMUSP00000027111,10090.ENSMUSP00000027478,10090.ENSMUSP00000028768,10090.ENSMUSP00000032882,10090.ENSMUSP00000033770,10090.ENSMUSP00000034234…	Cox5a,Ndufs2,Dguok,Uqcrb,Sdha,Ndufs6,Ndufb9,Cyc1,Ndufb8,Uqcrc1,Ndufs1,Ndufa10,Ndufaf1,Ndufc2,Mecp2,Coq9,Cox4i1,Lace1,Ndufa7,Ndufv1,Uqcrfs1,Cox6a1,Ndufv3,Uqcrq,Uqcr10,Coa6,Ndufa8,Ndufs8,Uqcrh,mt-Nd2,mt-Co1,mt-Co2,mt-Nd4,mt-Nd5,Ndufb6,Cox4i2,Dld,Sdhc,Snca,Cox7c,Ndufv2,Mtch2,Ndufa12
GO:0050730	Regulation of peptidyl-tyrosine phosphorylation	86	0.495948	top	0.0014	ks	10090.ENSMUSP00000000058,10090.ENSMUSP00000000109,10090.ENSMUSP00000000299,10090.ENSMUSP00000001963,10090.ENSMUSP00000002678,10090.ENSMUSP00000005406,10090.ENSMUSP00000007799,10090.ENSMUSP00000008878,10090.ENSMUSP00000010191,10090.ENSMUSP00000014546,10090.ENSMUSP00000017488,10090.ENSMUSP00000017799,10090.ENSMUSP00000018700,10090.ENSMUSP00000019911,10090.ENSMUSP00000020329,10090.ENSMUSP00000020640…	Cav2,Cntn1,Itgb2,Ace,Tgfb1,App,Cav1,Gprc5b,Hyal2,Tsg101,Vtn,Cd40,Dlg4,Hdac2,Egfr,Gnb2l1,Itgb3,Itga5,Pak2,Hcls1,Ahsg,Adipoq,Fgfr1op,Pdgfrb,Ppp2r5b,Chmp6,Nrp1,Pdcl3,Epha4,Ehd4,Ptpn1,Src,Arhgef2,Hpx,Arl2bp,Parp14,Lyn,Rap2b,Mif,Cbl,Vps25,Cd81,Inpp5f,Rictor,Prkca,Ctnnd1,Ppap2b,Cadm4,Adam17,Yes1,Aplp2,Hsph1,Pecam1,Icam1,Adnp,Itgb1,Prkce,Fyn,Ptpn11,Psen1,Mtor,Hdac1,Lrp8,Srcin1,Arrb2,Nf2,Dmtn,Ptprj,Afap1…
GO:0008016	Regulation of heart contraction	56	0.713585	top	0.0018	ks	10090.ENSMUSP00000001592,10090.ENSMUSP00000007799,10090.ENSMUSP00000014080,10090.ENSMUSP00000017841,10090.ENSMUSP00000018800,10090.ENSMUSP00000020721,10090.ENSMUSP00000021610,10090.ENSMUSP00000023608,10090.ENSMUSP00000024860,10090.ENSMUSP00000025239,10090.ENSMUSP00000025791,10090.ENSMUSP00000025875,10090.ENSMUSP00000027863,10090.ENSMUSP00000028991,10090.ENSMUSP00000029454,10090.ENSMUSP00000030669…	Jup,Cav1,Myl2,Ada,Myl4,Smtn,Chga,Atp5j,Ehd3,Bin1,Adrbk1,Slc1a1,Atp1b1,Snta1,Casq2,Slc9a1,Nos3,Atp2a2,P2rx4,Flna,Atp1a1,Trpm4,Ank2,Pebp1,Cacna2d1,Zmpste24,Pik3r1,S100a1,Adrb2,Prkca,Dlg1,Gja1,Glrx3,Pde5a,Gsk3a,Tmem65,Prkg1,Atp1a2,Slc8a1,Abcc9,Sumo1,Hsp90aa1,Nos1,Ctnna3,Gaa,Ace2,Tpm1,Dmd,Pde4d,Gnao1,Dsp,Gpd1l,Sri,Atp2b4,Nup155,Agrn
GO:1903532	Positive regulation of secretion by cell	140	0.591699	top	0.0018	ks	10090.ENSMUSP00000000199,10090.ENSMUSP00000000299,10090.ENSMUSP00000002678,10090.ENSMUSP00000003284,10090.ENSMUSP00000005509,10090.ENSMUSP00000005711,10090.ENSMUSP00000006217,10090.ENSMUSP00000007803,10090.ENSMUSP00000009157,10090.ENSMUSP00000010804,10090.ENSMUSP00000014546,10090.ENSMUSP00000016638,10090.ENSMUSP00000017975,10090.ENSMUSP00000019231,10090.ENSMUSP00000020312,10090.ENSMUSP00000020329…	Ncs1,Itgb2,Tgfb1,Irf3,Stx1a,Chmp2a,Snf8,Bcl2l1,Dynll1,Plcd1,Tsg101,Cd34,Rab5a,Atp6ap1,Mcu,Egfr,Mapk9,Map2k6,Gpld1,Glrx,Glud1,Rgcc,Dpysl2,Snx4,Cd2ap,Kif5b,Smad4,Adrbk1,Bad,Mgea5,Hgs,Mpc2,Snap25,Src,Ppid,Aimp1,Sdcbp,Cdk5,Cd38,Aacs,Atg7,Nucb2,Stx4a,Cask,Sytl4,Acsl4,Lamp1,Vps35,Vps4a,Rab27a,Fgg,Phpt1,Pck2,Fgb,Ptpn23,Trpm4,Mif,Rab8b,Rab3gap1,Lrp1,Gpi1,Vamp7,Foxl2,Arf6,Golph3,Vamp8,Pfkm,Prkca,Pcp4,Abat…
GO:0010001	Glial cell differentiation	88	0.415735	top	0.0023	ks	10090.ENSMUSP00000001780,10090.ENSMUSP00000002678,10090.ENSMUSP00000003320,10090.ENSMUSP00000003550,10090.ENSMUSP00000004910,10090.ENSMUSP00000005066,10090.ENSMUSP00000005256,10090.ENSMUSP00000005406,10090.ENSMUSP00000007130,10090.ENSMUSP00000007959,10090.ENSMUSP00000013807,10090.ENSMUSP00000016143,10090.ENSMUSP00000017488,10090.ENSMUSP00000020329,10090.ENSMUSP00000021119,10090.ENSMUSP00000022057…	Akt1,Tgfb1,Eif2b5,Ncstn,Eif2b2,Map2k1,Ndrg1,App,Ctnnb1,Rhoa,Pten,Wasf3,Vtn,Egfr,Aspa,Tppp,Clu,Sod1,Cdh2,Adrbk1,Vim,Lamc3,Gsn,Notch1,Tspan2,Lef1,Mettl14,Cdk5,Eif2b1,Kras,Cd9,Ilk,Plp1,Mt3,Smarca4,Csk,Lyn,Dicer1,Hdac11,Lrp1,Grn,Gpc1,S100b,Mapk3,Exoc4,Nfib,Slc25a46,Erbb2,Kcnj10,Ercc2,Adam22,S100a8,Gfap,Phgdh,Ppap2b,Mapk1,Itgam,Lamb2,Nf1,Sirt2,Mpp5,Arhgef10,Med12,Lama2,Ptpn11,Psen1,Cntnap1,Cnp,Gap43,P…
GO:0006935	Chemotaxis	134	0.542836	top	0.0024	ks	10090.ENSMUSP00000000129,10090.ENSMUSP00000000299,10090.ENSMUSP00000001569,10090.ENSMUSP00000002603,10090.ENSMUSP00000004715,10090.ENSMUSP00000005406,10090.ENSMUSP00000006293,10090.ENSMUSP00000006614,10090.ENSMUSP00000006956,10090.ENSMUSP00000007959,10090.ENSMUSP00000008893,10090.ENSMUSP00000009705,10090.ENSMUSP00000015511,10090.ENSMUSP00000017920,10090.ENSMUSP00000018963,10090.ENSMUSP00000021028…	Fer,Itgb2,Flot1,Scrib,Mospd2,App,Crkl,Epha2,Saa3,Rhoa,Coro1b,Eng,Plxnd1,Crk,Lsp1,Itgb3,Nup85,Srp54a,Chga,Evl,Emb,Dpysl2,Rpl24,Alcam,Kif5b,Smad4,Pdgfrb,Anxa1,Sbds,Alox5,Nrp1,Epha4,Plxna2,Kif5c,Notch1,Itgav,Vcam1,Lef1,Tmem57,Cdk5,Pf4,Flt1,Vasp,Cyfip1,Coro1a,Parva,Gab1,Cmtm3,Apoa1,Nckap1l,Rac2,Nexn,Prex1,Trpm4,Mif,Sema7a,Cmtm8,Lama1,Lrp1,Dpp4,Ptprm,Dock4,S1pr1,Plxnb2,Nfib,Erbb2,Prkca,S100a8,Hmgb2,It…
GO:1902475	L-alpha-amino acid transmembrane transport	25	0.968861	both ends	0.0024	ks	10090.ENSMUSP00000005493,10090.ENSMUSP00000015256,10090.ENSMUSP00000019226,10090.ENSMUSP00000021930,10090.ENSMUSP00000023099,10090.ENSMUSP00000025875,10090.ENSMUSP00000030269,10090.ENSMUSP00000033512,10090.ENSMUSP00000033871,10090.ENSMUSP00000041503,10090.ENSMUSP00000041557,10090.ENSMUSP00000046714,10090.ENSMUSP00000047690,10090.ENSMUSP00000054356,10090.ENSMUSP00000079100,10090.ENSMUSP00000082489…	Slc1a3,Slc25a13,Slc25a22,Sfxn1,Slc38a2,Slc1a1,Slc6a9,Slc38a5,Slc25a15,Arl6ip5,Slc7a5,Slc7a1,Slc6a20a,Kcnj10,Slc1a2,Slc17a7,Slc7a2,Slc1a5,Slc36a1,Slc1a4,Slc43a1,Slc25a18,Slc25a12,Slc3a2,Slc38a3
GO:0098739	Import across plasma membrane	39	0.867682	both ends	0.0025	ks	10090.ENSMUSP00000005493,10090.ENSMUSP00000017900,10090.ENSMUSP00000018651,10090.ENSMUSP00000021077,10090.ENSMUSP00000025875,10090.ENSMUSP00000027131,10090.ENSMUSP00000027863,10090.ENSMUSP00000028549,10090.ENSMUSP00000030669,10090.ENSMUSP00000032185,10090.ENSMUSP00000034983,10090.ENSMUSP00000038106,10090.ENSMUSP00000039657,10090.ENSMUSP00000040367,10090.ENSMUSP00000046714,10090.ENSMUSP00000047353…	Slc1a3,Slc12a7,Trpv2,Slc9a3r1,Slc1a1,Slc39a10,Atp1b1,Slc12a6,Slc9a1,Slc6a6,Atp1b3,Slc12a9,Atp1a1,Trpm4,Slc7a1,Atp1b2,Kcnj10,Trpv4,Slc1a2,Slc31a1,Atp1a2,Slc8a1,Abcc9,Hfe,Pawr,Slc7a2,Abcc1,Atp1a3,Slc19a1,Folr1,Slc1a5,Slc1a4,Atp1a4,Prkcd,Kcnj13,Slc12a2,Slc12a4,Slc8a2,Slc3a2
GO:0046034	ATP metabolic process	112	0.182421	top	0.0032	ks	10090.ENSMUSP00000000090,10090.ENSMUSP00000002678,10090.ENSMUSP00000003461,10090.ENSMUSP00000004378,10090.ENSMUSP00000005829,10090.ENSMUSP00000006435,10090.ENSMUSP00000011896,10090.ENSMUSP00000013737,10090.ENSMUSP00000014457,10090.ENSMUSP00000014698,10090.ENSMUSP00000015256,10090.ENSMUSP00000015501,10090.ENSMUSP00000015800,10090.ENSMUSP00000015934,10090.ENSMUSP00000016396,10090.ENSMUSP00000020522…	Cox5a,Tgfb1,Ogdh,Eno2,Ampd3,Atp6v1b2,Pgam1,Ndufs2,Cox6c,Dguok,Slc25a13,Clpx,Hspa8,Surf1,Atp5e,Pfkl,Galk1,Uqcrb,Sdha,Ndufs6,Ndufb9,Cyc1,Atp5j,Atp5o,Msh2,Ak3,Bad,Ndufb8,Adpgk,Atp5b,Atp5a1,Uqcrc1,Nudt5,Ndufs1,Ndufa10,Parp1,Atp1b1,Kif5c,Slc25a25,Ola1,Ndufaf1,Aldob,Vcp,Stoml2,Ak2,Nmnat1,Ndufc2,Mecp2,Coq9,Cox4i1,Pkm,Mpi,Cox7a2,Lace1,Ndufa7,Ndufv1,Dak,Uqcrfs1,Bpgm,Cox6a1,Ndufv3,Gpi1,Atp5k,Uqcrq,Uqcr10,C…
GO:0010522	Regulation of calcium ion transport into cytosol	36	0.764347	top	0.0033	ks	10090.ENSMUSP00000002678,10090.ENSMUSP00000002765,10090.ENSMUSP00000004137,10090.ENSMUSP00000007799,10090.ENSMUSP00000014920,10090.ENSMUSP00000017961,10090.ENSMUSP00000021028,10090.ENSMUSP00000023749,10090.ENSMUSP00000025337,10090.ENSMUSP00000026243,10090.ENSMUSP00000028681,10090.ENSMUSP00000029454,10090.ENSMUSP00000031429,10090.ENSMUSP00000032949,10090.ENSMUSP00000033093,10090.ENSMUSP00000037206…	Tgfb1,Prkd1,Gstm7,Cav1,Nol3,Jph2,Itgb3,Tmbim6,Diap1,Mgea5,F2,Casq2,P2rx4,Coro1a,Bax,Fkbp1a,Lyn,Ank2,Atg5,Adrb2,Asph,Htt,Pml,Slc8a1,Prkce,Fyn,Plcg1,Camk2d,Dmd,Snca,Thy1,Pde4d,Dbi,Myo5a,Sri,Ptpn6
GO:0010543	Regulation of platelet activation	19	1.48226	top	0.0033	afc	10090.ENSMUSP00000000329,10090.ENSMUSP00000027467,10090.ENSMUSP00000032492,10090.ENSMUSP00000032749,10090.ENSMUSP00000037018,10090.ENSMUSP00000038838,10090.ENSMUSP00000041907,10090.ENSMUSP00000062256,10090.ENSMUSP00000062392,10090.ENSMUSP00000063548,10090.ENSMUSP00000070868,10090.ENSMUSP00000073268,10090.ENSMUSP00000096266,10090.ENSMUSP00000099945,10090.ENSMUSP00000106612,10090.ENSMUSP00000107121…	Alox12,Serpine2,Cd9,Vps33b,Fgg,Lyn,F11r,Adrb2,Prkca,Abat,Pla2g4a,Prkg1,Ceacam1,Plek,Dmtn,Ptprj,Prkcd,Syk,Apoe
GO:0022407	Regulation of cell-cell adhesion	132	0.488091	both ends	0.0033	ks	10090.ENSMUSP00000000299,10090.ENSMUSP00000000329,10090.ENSMUSP00000000590,10090.ENSMUSP00000001569,10090.ENSMUSP00000001780,10090.ENSMUSP00000002603,10090.ENSMUSP00000002678,10090.ENSMUSP00000003612,10090.ENSMUSP00000004145,10090.ENSMUSP00000004990,10090.ENSMUSP00000005066,10090.ENSMUSP00000005292,10090.ENSMUSP00000006749,10090.ENSMUSP00000007799,10090.ENSMUSP00000007959,10090.ENSMUSP00000017841…	Itgb2,Alox12,Rdx,Flot1,Akt1,Scrib,Tgfb1,Dusp3,Stat5a,Mapk14,Map2k1,Prdx2,Slc4a1,Cav1,Rhoa,Ada,Arg1,Vsir,Ap3d1,Gtpbp4,Ap3b1,Rgcc,Tfrc,Adipoq,Aif1,Anxa1,Rela,Capn1,Bad,Podxl,Alox5,Hspd1,Ppm1f,Serpine2,Spta1,Notch1,Itga6,Jag1,Src,Vcam1,Lef1,Mad1l1,Cd9,Vps33b,Coro1a,Rps3,Pycard,Swap70,Irak1,Apoa1,Nckap1l,Fgg,Fermt3,Lyn,Dennd6a,Fgb,Ptpn23,F11r,Cd81,Pnp,Dpp4,Specc1l,Mbp,Sart1,Adk,Dnaja3,Erbb2,Prkar1a,P…
GO:0034762	Regulation of transmembrane transport	185	0.328937	top	0.0033	ks	10090.ENSMUSP00000001115,10090.ENSMUSP00000001780,10090.ENSMUSP00000001963,10090.ENSMUSP00000002048,10090.ENSMUSP00000002572,10090.ENSMUSP00000002678,10090.ENSMUSP00000002765,10090.ENSMUSP00000004137,10090.ENSMUSP00000004327,10090.ENSMUSP00000004375,10090.ENSMUSP00000004990,10090.ENSMUSP00000005234,10090.ENSMUSP00000005406,10090.ENSMUSP00000006286,10090.ENSMUSP00000007257,10090.ENSMUSP00000007799…	Grk6,Akt1,Ace,Taco1,Slc9a3r2,Tgfb1,Prkd1,Gstm7,G6pdx,Phb2,Mapk14,Wdr1,App,Inpp5k,Clic1,Cav1,Pten,Pea15a,Chp1,Nol3,Cybb,Ctss,Jph2,Dlg4,Ywhah,Appl2,Ppp2ca,Itgb3,Slc9a3r1,Vamp2,Glrx,Ppif,Adipoq,Clic6,Rgn,Clic5,Ehd3,C3,Kif5b,Bin1,Diap1,Adrbk1,Aspscr1,Mgea5,Alox5,Iscu,Sept2,Atp1b1,Stom,F2,Snta1,Fabp5,Car2,Casq2,Ahcyl1,Gpr89,Slc9a1,Park7,Cdk5,Tesc,Fam115c,Kel,Arl6ip1,Coro1a,Bax,Stim1,Flna,Ikbkb,Slc25a4…
GO:0042775	Mitochondrial atp synthesis coupled electron transport	38	0.465492	top	0.0033	ks	10090.ENSMUSP00000000090,10090.ENSMUSP00000013737,10090.ENSMUSP00000014698,10090.ENSMUSP00000021993,10090.ENSMUSP00000022062,10090.ENSMUSP00000022097,10090.ENSMUSP00000022980,10090.ENSMUSP00000023210,10090.ENSMUSP00000026222,10090.ENSMUSP00000026743,10090.ENSMUSP00000027478,10090.ENSMUSP00000028768,10090.ENSMUSP00000032882,10090.ENSMUSP00000033770,10090.ENSMUSP00000034234,10090.ENSMUSP00000034276…	Cox5a,Ndufs2,Dguok,Uqcrb,Sdha,Ndufs6,Ndufb9,Cyc1,Ndufb8,Uqcrc1,Ndufa10,Ndufaf1,Ndufc2,Mecp2,Coq9,Cox4i1,Lace1,Ndufa7,Ndufv1,Uqcrfs1,Cox6a1,Ndufv3,Uqcrq,Uqcr10,Ndufa8,Ndufs8,Uqcrh,mt-Nd2,mt-Co1,Ndufb6,Cox4i2,Dld,Sdhc,Snca,Cox7c,Ndufv2,Mtch2,Ndufa12
GO:0048168	Regulation of neuronal synaptic plasticity	30	1.10342	top	0.0033	ks	10090.ENSMUSP00000003121,10090.ENSMUSP00000003961,10090.ENSMUSP00000005406,10090.ENSMUSP00000017975,10090.ENSMUSP00000018700,10090.ENSMUSP00000023507,10090.ENSMUSP00000026572,10090.ENSMUSP00000027966,10090.ENSMUSP00000030637,10090.ENSMUSP00000032399,10090.ENSMUSP00000042070,10090.ENSMUSP00000047968,10090.ENSMUSP00000054356,10090.ENSMUSP00000069429,10090.ENSMUSP00000071289,10090.ENSMUSP00000079380…	Rab8a,Ppfia3,App,Rab5a,Dlg4,Gsk3b,Hras,Fcgr2b,Ncdn,Kras,Rab3gap1,S100b,Kcnj10,Syp,Nf1,Rac1,Syngap1,Nptn,Synpo,Slc4a10,Camk2a,Unc13b,Shank3,Camk2b,Rab3a,Kdr,Snca,Syn1,Slc8a2,Rab11a
GO:0050684	Regulation of mrna processing	109	0.347008	bottom	0.0033	ks	10090.ENSMUSP00000001620,10090.ENSMUSP00000002121,10090.ENSMUSP00000003527,10090.ENSMUSP00000003529,10090.ENSMUSP00000005041,10090.ENSMUSP00000005749,10090.ENSMUSP00000007007,10090.ENSMUSP00000007042,10090.ENSMUSP00000009699,10090.ENSMUSP00000015800,10090.ENSMUSP00000018337,10090.ENSMUSP00000018909,10090.ENSMUSP00000019118,10090.ENSMUSP00000021062,10090.ENSMUSP00000021428,10090.ENSMUSP00000021438…	Fxr1,Supt6,Supt5,Paf1,U2af2,Ctr9,Wtap,Ik,Cdk9,Hspa8,Cdc73,Fxr2,Sart3,Ddx5,Snw1,Nova1,Akr1c6,Acin1,Khdrbs3,Ncbp2,Iws1,Eif4a3,Ncl,BC005624,Dhx36,Ahcyl1,Larp7,Rnf20,Ncbp1,Smu1,Srsf9,Rbm19,Tra2a,Rnf40,Nudt21,Dhx9,Cpsf7,Rbm3,Ythdc1,Hnrnpk,Rbm42,Rbm17,Rbm8a,Leo1,Zbtb7a,Jmjd6,Hnrnpu,Rbmxl1,Rbm25,Sltm,Rbm15,Ddx17,Srsf4,Sfswap,Khdrbs1,Cpsf6,Nup98,Celf1,Cdk11b,Srsf7,Prdx6,Snrnp70,Srek1,Safb2,Npm1,Sf3b4,C1q…
GO:0050854	Regulation of antigen receptor-mediated signaling pathway	26	0.462664	both ends	0.0033	ks	10090.ENSMUSP00000003612,10090.ENSMUSP00000017841,10090.ENSMUSP00000021527,10090.ENSMUSP00000025867,10090.ENSMUSP00000027131,10090.ENSMUSP00000027966,10090.ENSMUSP00000032998,10090.ENSMUSP00000034343,10090.ENSMUSP00000037417,10090.ENSMUSP00000038838,10090.ENSMUSP00000043768,10090.ENSMUSP00000063734,10090.ENSMUSP00000070019,10090.ENSMUSP00000070554,10090.ENSMUSP00000083273,10090.ENSMUSP00000086716…	Dusp3,Ada,Prkch,Rela,Slc39a10,Fcgr2b,Rps3,Cmtm3,Phpt1,Lyn,Cd81,Ezr,Prkcb,Usp46,Prkd2,Usp9x,Pawr,Ceacam1,Dgkz,Ptprj,Cblb,Thy1,Lgals3,Rc3h1,Ptpn6,Ptprc
GO:0038063	Collagen-activated tyrosine kinase receptor signaling pathway	5	3.584	top	0.0034	afc	10090.ENSMUSP00000001547,10090.ENSMUSP00000033898,10090.ENSMUSP00000033899,10090.ENSMUSP00000109084,10090.ENSMUSP00000113852	Col1a1,Col4a1,Col4a2,Col4a3,Syk
GO:0002761	Regulation of myeloid leukocyte differentiation	39	0.487461	both ends	0.0035	ks	10090.ENSMUSP00000002678,10090.ENSMUSP00000004145,10090.ENSMUSP00000007130,10090.ENSMUSP00000016680,10090.ENSMUSP00000019231,10090.ENSMUSP00000021028,10090.ENSMUSP00000021217,10090.ENSMUSP00000022317,10090.ENSMUSP00000022793,10090.ENSMUSP00000023507,10090.ENSMUSP00000023531,10090.ENSMUSP00000023593,10090.ENSMUSP00000027189,10090.ENSMUSP00000028633,10090.ENSMUSP00000029078,10090.ENSMUSP00000029611…	Tgfb1,Stat5a,Ctnnb1,Cul4a,Atp6ap1,Itgb3,Nme2,Fam213a,Acin1,Gsk3b,Hcls1,Adipoq,Casp8,Fbn1,Car2,Lef1,Ctnnbip1,Tesc,Pf4,Clec2d,Lyn,Inpp4b,Thoc5,Zbtb7a,Pik3r1,Rbp1,Prkca,Itgam,Nf1,Gnas,Ceacam1,Tjp2,Mtor,Nme1,Cdk6,Inpp5d,Ripk1,Foxp1,Creb1
GO:0007528	Neuromuscular junction development	19	1.46795	top	0.0035	afc	10090.ENSMUSP00000005406,10090.ENSMUSP00000025408,10090.ENSMUSP00000027178,10090.ENSMUSP00000028991,10090.ENSMUSP00000030914,10090.ENSMUSP00000033040,10090.ENSMUSP00000033898,10090.ENSMUSP00000034740,10090.ENSMUSP00000052584,10090.ENSMUSP00000053842,10090.ENSMUSP00000053897,10090.ENSMUSP00000069087,10090.ENSMUSP00000103586,10090.ENSMUSP00000104932,10090.ENSMUSP00000106018,10090.ENSMUSP00000107250…	App,Afg3l2,Als2,Snta1,Rer1,Pak1,Col4a1,Nedd4,Lrrk2,Dnaja3,Erbb2,Lamb2,Unc13b,Shank3,Gphn,Ppfibp1,Dctn1,Kalrn,Agrn
GO:0051047	Positive regulation of secretion	150	0.52787	top	0.0038	ks	10090.ENSMUSP00000000199,10090.ENSMUSP00000000299,10090.ENSMUSP00000002678,10090.ENSMUSP00000003284,10090.ENSMUSP00000004774,10090.ENSMUSP00000005509,10090.ENSMUSP00000005711,10090.ENSMUSP00000006217,10090.ENSMUSP00000007803,10090.ENSMUSP00000009157,10090.ENSMUSP00000010804,10090.ENSMUSP00000014546,10090.ENSMUSP00000016638,10090.ENSMUSP00000017975,10090.ENSMUSP00000019231,10090.ENSMUSP00000020312…	Ncs1,Itgb2,Tgfb1,Irf3,Aqp1,Stx1a,Chmp2a,Snf8,Bcl2l1,Dynll1,Plcd1,Tsg101,Cd34,Rab5a,Atp6ap1,Mcu,Egfr,Mapk9,Map2k6,Gpld1,Glrx,Glud1,Rgcc,Dpysl2,Snx4,Cd2ap,Kif5b,Smad4,Adrbk1,Bad,Mgea5,Hgs,Mpc2,Snap25,Src,Ppid,Aimp1,Sdcbp,Cdk5,Cd38,Aacs,Slc6a1,Atg7,Nucb2,Stx4a,Cask,Sytl4,Acsl4,Lamp1,Vps35,Map1lc3b,Vps4a,Rab27a,Fgg,Phpt1,Pck2,Fgb,Ptpn23,Trpm4,Mif,Rab8b,Rab3gap1,Lrp1,Atg5,Acsl3,Gpi1,Vamp7,Foxl2,Arf6,G…
GO:0007409	Axonogenesis	115	0.6173	top	0.0042	ks	10090.ENSMUSP00000001569,10090.ENSMUSP00000003121,10090.ENSMUSP00000003152,10090.ENSMUSP00000004389,10090.ENSMUSP00000005406,10090.ENSMUSP00000005671,10090.ENSMUSP00000006614,10090.ENSMUSP00000013807,10090.ENSMUSP00000015511,10090.ENSMUSP00000017629,10090.ENSMUSP00000019405,10090.ENSMUSP00000021001,10090.ENSMUSP00000021091,10090.ENSMUSP00000021689,10090.ENSMUSP00000022242,10090.ENSMUSP00000022369…	Flot1,Rab8a,Stk11,Grcc10,App,Igf1r,Epha2,Pten,Plxnd1,Top2b,Map1s,Rab10,Pafah1b1,Evl,Emb,Vcl,Dpysl2,Rpl24,Alcam,Gsk3b,Hsp90ab1,Kif5b,Smad4,Afg3l2,Nrp1,Als2,Epha4,Plxna2,Kif5c,Notch1,Dock7,Stmn1,Cdk5,Uchl1,Atg7,Vasp,Cyfip1,Rac2,Nexn,Spg11,Shtn1,Sema7a,Lama1,Lrp1,Ptprm,Tbce,Dclk1,Picalm,Plxnb2,Nfib,Slc25a46,Erbb2,Llgl1,Prkca,Map1b,Lamb2,Bsg,Tubb3,Plxnb1,Cxcl12,Map2,Unc5b,Enah,Ablim1,Rac1,Nptn,Lgi1,N…
GO:0051279	Regulation of release of sequestered calcium ion into cytosol	29	0.942354	top	0.0042	ks	10090.ENSMUSP00000002678,10090.ENSMUSP00000002765,10090.ENSMUSP00000004137,10090.ENSMUSP00000014920,10090.ENSMUSP00000017961,10090.ENSMUSP00000021028,10090.ENSMUSP00000025337,10090.ENSMUSP00000028681,10090.ENSMUSP00000029454,10090.ENSMUSP00000032949,10090.ENSMUSP00000033093,10090.ENSMUSP00000037206,10090.ENSMUSP00000038838,10090.ENSMUSP00000043765,10090.ENSMUSP00000044769,10090.ENSMUSP00000077273…	Tgfb1,Prkd1,Gstm7,Nol3,Jph2,Itgb3,Diap1,F2,Casq2,Coro1a,Bax,Fkbp1a,Lyn,Ank2,Atg5,Asph,Htt,Slc8a1,Prkce,Plcg1,Camk2d,Dmd,Snca,Thy1,Pde4d,Dbi,Myo5a,Sri,Ptpn6
GO:0051928	Positive regulation of calcium ion transport	45	0.475016	top	0.0045	ks	10090.ENSMUSP00000004137,10090.ENSMUSP00000004327,10090.ENSMUSP00000007799,10090.ENSMUSP00000017961,10090.ENSMUSP00000018651,10090.ENSMUSP00000020107,10090.ENSMUSP00000023538,10090.ENSMUSP00000023832,10090.ENSMUSP00000024860,10090.ENSMUSP00000025522,10090.ENSMUSP00000026243,10090.ENSMUSP00000027863,10090.ENSMUSP00000028681,10090.ENSMUSP00000030669,10090.ENSMUSP00000030814,10090.ENSMUSP00000031429…	Gstm7,G6pdx,Cav1,Jph2,Trpv2,Atp2b1,Mylk,Rgn,Ehd3,Pdgfrb,Mgea5,Atp1b1,F2,Slc9a1,Cdk5,P2rx4,Itpr1,Bax,Stim1,Cask,Ank2,Wfs1,Cacna2d1,Trpc6,S100a1,Adrb2,Cxcl12,Asph,Htt,Hspa2,Plcg2,Gbas,Atp2b2,Sumo1,Plcg1,Camk2a,Arrb2,Snca,Thy1,Orai1,Stim2,Lgals3,Dbi,Rapgef3,Sri
GO:1903307	Positive regulation of regulated secretory pathway	25	0.890324	top	0.0045	ks	10090.ENSMUSP00000000299,10090.ENSMUSP00000005509,10090.ENSMUSP00000007803,10090.ENSMUSP00000023502,10090.ENSMUSP00000030814,10090.ENSMUSP00000033075,10090.ENSMUSP00000033824,10090.ENSMUSP00000034722,10090.ENSMUSP00000052262,10090.ENSMUSP00000059501,10090.ENSMUSP00000064706,10090.ENSMUSP00000068468,10090.ENSMUSP00000078534,10090.ENSMUSP00000089051,10090.ENSMUSP00000090844,10090.ENSMUSP00000100912…	Itgb2,Stx1a,Bcl2l1,Snx4,Cdk5,Stx4a,Lamp1,Rab27a,Vamp7,Vamp8,Cadps,Itgam,Erc1,Stxbp1,Ap1g1,Syt1,Unc13b,Rab3a,Dnm1l,Syt2,Rab3d,Syk,Prrt2,Stxbp2,Syt7
GO:0042254	Ribosome biogenesis	131	0.281545	bottom	0.0049	ks	10090.ENSMUSP00000000804,10090.ENSMUSP00000001485,10090.ENSMUSP00000001724,10090.ENSMUSP00000004379,10090.ENSMUSP00000004554,10090.ENSMUSP00000008826,10090.ENSMUSP00000016680,10090.ENSMUSP00000017408,10090.ENSMUSP00000018841,10090.ENSMUSP00000020820,10090.ENSMUSP00000021048,10090.ENSMUSP00000021574,10090.ENSMUSP00000022281,10090.ENSMUSP00000022855,10090.ENSMUSP00000023217,10090.ENSMUSP00000023269…	Ddx3x,Mrpl10,Ddx18,Emg1,Rps5,Rpl10,Cul4a,Exosc10,Aatf,Mrpl22,Ftsj3,Gtpbp4,Skiv2l2,Brix1,Bop1,Rpl24,Wdr46,Rps14,Rpp30,Mrpl11,Sbds,Pa2g4,Eif4a3,Exosc7,Wdr12,Nifk,Nop10,Nat10,Eif6,Exosc8,Eif2a,Gar1,Rpf1,Exosc3,Nol6,Ebna1bp2,Ran,Rpl6,Ddx47,Mrps11,Rrp8,Dkc1,Frg1,Rpsa,Dhx29,Rpf2,Ipo9,Ipo4,Mrps2,Fbl,Tsr1,Pak1ip1,Wdr18,Dis3,Ddx21,Exosc2,Gltscr2,Mybbp1a,Rps27l,Eftud1,Utp6,Nop2,Sart1,Nup88,Utp15,Cirh1a,Rpl…
GO:1903034	Regulation of response to wounding	85	0.800073	top	0.0049	ks	10090.ENSMUSP00000000049,10090.ENSMUSP00000000329,10090.ENSMUSP00000005066,10090.ENSMUSP00000005292,10090.ENSMUSP00000005671,10090.ENSMUSP00000007799,10090.ENSMUSP00000013807,10090.ENSMUSP00000014578,10090.ENSMUSP00000015858,10090.ENSMUSP00000016638,10090.ENSMUSP00000016771,10090.ENSMUSP00000017920,10090.ENSMUSP00000023538,10090.ENSMUSP00000023589,10090.ENSMUSP00000023629,10090.ENSMUSP00000024757…	Apoh,Alox12,Map2k1,Prdx2,Igf1r,Cav1,Pten,Plg,Cers2,Cd34,Myh9,Crk,Mylk,Kng1,Pros1,Enpp4,Anxa1,Hras,Alox5,Epha4,Serpine2,F2,Anxa5,Cd9,Vps33b,Vkorc1,Cask,Sytl4,Flna,Anxa2,Fgg,Lyn,Fgb,Mif,F11r,Lrp1,Scarf1,Thbs1,Inpp5f,Grn,Phldb2,Acta2,Tspan8,Atp7a,Adrb2,Prkca,Abat,Ptprs,Gja1,Ppap2b,Cadm4,Adam17,Serpinc1,Pla2g4a,Ano6,Prkg1,Stk24,Hmgb1,Arfgef1,Itgb1,Prkce,Ceacam1,Thbd,Ptn,Mtor,Rtn4,Plek,Tbxa2r,Klf4,Ptk…
GO:0098742	Cell-cell adhesion via plasma-membrane adhesion molecules	38	0.580111	top	0.005	ks	10090.ENSMUSP00000002011,10090.ENSMUSP00000022242,10090.ENSMUSP00000023128,10090.ENSMUSP00000023312,10090.ENSMUSP00000025166,10090.ENSMUSP00000026558,10090.ENSMUSP00000029574,10090.ENSMUSP00000031249,10090.ENSMUSP00000033450,10090.ENSMUSP00000034076,10090.ENSMUSP00000034339,10090.ENSMUSP00000034650,10090.ENSMUSP00000035037,10090.ENSMUSP00000036962,10090.ENSMUSP00000037120,10090.ENSMUSP00000039103…	Esam,Emb,Itga5,Alcam,Cdh2,Ric8,Vcam1,Sparcl1,Gpc4,Cbln1,Cdh5,Mcam,Pik3cb,Clstn1,Nexn,Atp2c1,Pcdh18,Cldn5,Cldn11,Cdh10,Ptprm,Plxnb2,Tgfbr2,Ptprs,Mpz,Bsg,Pecam1,Nptn,Cadm1,Lgals1,Il1rap,L1cam,Lgals9,Cadm3,Arvcf,Palld,Cdh13,Mag
GO:0006875	Cellular metal ion homeostasis	176	0.22237	top	0.0053	ks	10090.ENSMUSP00000000058,10090.ENSMUSP00000000199,10090.ENSMUSP00000002043,10090.ENSMUSP00000002091,10090.ENSMUSP00000002678,10090.ENSMUSP00000003754,10090.ENSMUSP00000004137,10090.ENSMUSP00000005406,10090.ENSMUSP00000005431,10090.ENSMUSP00000007799,10090.ENSMUSP00000010804,10090.ENSMUSP00000013304,10090.ENSMUSP00000014920,10090.ENSMUSP00000017799,10090.ENSMUSP00000017961,10090.ENSMUSP00000018651…	Cav2,Ncs1,Ccdc47,Bcap31,Tgfb1,Calb2,Gstm7,App,Letm1,Cav1,Plcd1,Atp6v0d1,Nol3,Cd40,Jph2,Trpv2,Dlg4,Fis1,Atp6ap1,Atp2b1,Mcu,Gna13,Atp2a3,Chga,Mcur1,Hexb,Ero1l,Tfrc,Kng1,Sod1,Tmbim6,Rgn,Slc39a7,Smad4,Afg3l2,Fth1,Plcb3,Got1,Mgea5,Iscu,Maip1,Slc39a10,Slc40a1,Atp1b1,Itgav,F2,Casq2,Ccdc109b,Calb1,Stoml2,Slc9a1,Cdk5,Gnb1,Cd38,Tmem165,Tesc,Atp2a2,P2rx4,Kel,Itpr1,Nucb2,Bax,Hpx,Stim1,Swap70,Ccdc22,Abcb7,Mt3…
GO:0034109	Homotypic cell-cell adhesion	23	2.70769	top	0.0053	ks	10090.ENSMUSP00000001592,10090.ENSMUSP00000021028,10090.ENSMUSP00000037018,10090.ENSMUSP00000037858,10090.ENSMUSP00000038841,10090.ENSMUSP00000039472,10090.ENSMUSP00000052912,10090.ENSMUSP00000065719,10090.ENSMUSP00000079341,10090.ENSMUSP00000089051,10090.ENSMUSP00000097154,10090.ENSMUSP00000099375,10090.ENSMUSP00000099681,10090.ENSMUSP00000099935,10090.ENSMUSP00000099945,10090.ENSMUSP00000100964…	Jup,Itgb3,Fgg,Fermt3,Rap2b,Fgb,Pdia6,Ppap2b,Gnas,Stxbp1,Tjp2,Itga2b,Stxbp3a,L1cam,Plek,Pip5k1c,Ctnna3,Cfh,Dsp,Ptpn6,Ncam1,Fga,Pear1
GO:0030001	Metal ion transport	161	0.306843	top	0.006	ks	10090.ENSMUSP00000000199,10090.ENSMUSP00000003115,10090.ENSMUSP00000004774,10090.ENSMUSP00000005431,10090.ENSMUSP00000005493,10090.ENSMUSP00000007799,10090.ENSMUSP00000010804,10090.ENSMUSP00000014920,10090.ENSMUSP00000017900,10090.ENSMUSP00000018561,10090.ENSMUSP00000018651,10090.ENSMUSP00000019939,10090.ENSMUSP00000020107,10090.ENSMUSP00000020312,10090.ENSMUSP00000020420,10090.ENSMUSP00000021077…	Ncs1,Cdkn1b,Aqp1,Letm1,Slc1a3,Cav1,Plcd1,Nol3,Slc12a7,Myo1b,Trpv2,Snx3,Atp2b1,Mcu,Ap3d1,Slc9a3r1,Atp2a3,Mrs2,Mcur1,Sfxn1,Ap3b1,Ero1l,Slc38a2,Tfrc,Slc39a7,Afg3l2,Fth1,Slc1a1,Plcb3,Cdk2,Ccdc51,Maip1,Slc39a10,Slc40a1,Atp1b1,Slc25a25,Itgav,Slc12a6,Commd9,Snap25,Slc23a2,Armc1,Anxa5,Ccdc109b,Stoml2,Slc6a9,Mfsd2a,Slc9a1,Cdk5,Tmem165,Atp2a2,P2rx4,Sec61a1,Slc6a6,Itpr1,Slc6a11,Slc6a1,Fkbp4,Coro1a,Hpx,Stim1…
GO:0006091	Generation of precursor metabolites and energy	192	0.133367	top	0.0062	ks	10090.ENSMUSP00000000090,10090.ENSMUSP00000000828,10090.ENSMUSP00000000985,10090.ENSMUSP00000001780,10090.ENSMUSP00000003461,10090.ENSMUSP00000003720,10090.ENSMUSP00000003964,10090.ENSMUSP00000004232,10090.ENSMUSP00000004327,10090.ENSMUSP00000004378,10090.ENSMUSP00000004729,10090.ENSMUSP00000005493,10090.ENSMUSP00000005651,10090.ENSMUSP00000005826,10090.ENSMUSP00000005964,10090.ENSMUSP00000006105…	Cox5a,Txnrd3,Oxa1l,Akt1,Ogdh,Crot,Gys1,Adh1,G6pdx,Eno2,Etfb,Slc1a3,Por,Cs,Adh5,Shpk,Sod2,Sdhb,Pgam1,Ndufs2,Cox6c,Dguok,Ppp1cb,Slc25a13,Cybb,Acadsb,Surf1,Atp5e,Slc25a22,Mdh2,Uqcr11,Pfkl,Galk1,Glrx5,Uqcrb,Sdha,Glrx,Ndufs6,Pdhb,Ndufs4,Tkt,Ndufb9,Adsl,Aco2,Cyc1,Dgat1,Gsk3b,Atp5j,Atp5o,Gpd1,Ndufa5,Xdh,Msh2,Ndufb8,Adpgk,Bloc1s1,Atp5b,Atp5a1,Taldo1,Uqcrc1,Ndufs1,Rpe,Ndufb3,Ndufa10,Fh1,Slc25a25,Ptges2,Ca…
GO:0007611	Learning or memory	91	0.459057	top	0.0062	ks	10090.ENSMUSP00000000137,10090.ENSMUSP00000000608,10090.ENSMUSP00000000769,10090.ENSMUSP00000001548,10090.ENSMUSP00000002048,10090.ENSMUSP00000002979,10090.ENSMUSP00000003345,10090.ENSMUSP00000003550,10090.ENSMUSP00000005406,10090.ENSMUSP00000013807,10090.ENSMUSP00000020288,10090.ENSMUSP00000020329,10090.ENSMUSP00000021091,10090.ENSMUSP00000021607,10090.ENSMUSP00000022322,10090.ENSMUSP00000022429…	Actr2,Gm2a,Serpinf1,Itga3,Taco1,Lamb1,Amph,Ncstn,App,Pten,Eif4ebp2,Egfr,Pafah1b1,Lgmn,Glud1,Arf4,Itga5,Pde1b,Fen1,Ric8,Itga8,Gatm,Snap25,Bche,Calb1,Ppt1,Cdk5,Kras,Slc6a1,Pak1,Mecp2,Ddhd2,Man2b1,Ldlr,Uba6,Tanc1,Ythdf1,Itpr3,Prkar2b,Ppp1r9b,Atp8a1,Aaas,S100b,Gpi1,Picalm,Amfr,Abi2,Ptgs1,Adrb2,Prkca,Pde5a,Atad1,Nrgn,Nf1,Pgrmc1,Ppp1r1b,Htt,Syngap1,Slc17a7,Atp1a2,Adnp,Itgb1,Casp3,Map1a,Synpo,Tmod2,Prkc…
GO:0015800	Acidic amino acid transport	23	0.975689	top	0.0062	ks	10090.ENSMUSP00000005493,10090.ENSMUSP00000015256,10090.ENSMUSP00000019226,10090.ENSMUSP00000019577,10090.ENSMUSP00000021077,10090.ENSMUSP00000025830,10090.ENSMUSP00000025875,10090.ENSMUSP00000032185,10090.ENSMUSP00000032454,10090.ENSMUSP00000033040,10090.ENSMUSP00000036181,10090.ENSMUSP00000041503,10090.ENSMUSP00000054356,10090.ENSMUSP00000064536,10090.ENSMUSP00000066015,10090.ENSMUSP00000071289…	Slc1a3,Slc25a13,Slc25a22,Gipc1,Slc9a3r1,Apba1,Slc1a1,Slc6a6,Slc6a1,Pak1,Myo6,Arl6ip5,Kcnj10,Gja1,Lrrc8c,Nf1,Slc1a2,Slc17a7,Lrrc8a,Slc1a5,Slc1a4,Slc25a18,Slc25a12
GO:0042738	Exogenous drug catabolic process	5	2.78573	bottom	0.0062	afc	10090.ENSMUSP00000003137,10090.ENSMUSP00000006094,10090.ENSMUSP00000026552,10090.ENSMUSP00000099617,10090.ENSMUSP00000130338	Cyp2c29,Cyp2d26,Cyp2e1,Nos1,Cyp2d11
GO:0019722	Calcium-mediated signaling	35	0.846112	top	0.0063	ks	10090.ENSMUSP00000002091,10090.ENSMUSP00000005406,10090.ENSMUSP00000019198,10090.ENSMUSP00000020312,10090.ENSMUSP00000024792,10090.ENSMUSP00000027863,10090.ENSMUSP00000029454,10090.ENSMUSP00000029574,10090.ENSMUSP00000030669,10090.ENSMUSP00000031423,10090.ENSMUSP00000031429,10090.ENSMUSP00000032192,10090.ENSMUSP00000038150,10090.ENSMUSP00000040367,10090.ENSMUSP00000041732,10090.ENSMUSP00000042188…	Bcap31,App,Fis1,Mcu,Treml1,Atp1b1,Casq2,Vcam1,Slc9a1,Atp2a2,P2rx4,Itpr1,Itpr3,Trpm4,Ppp1r9b,Tpcn1,Ank2,Itpr2,Lrrk2,Ppp3ca,Zmpste24,Prkaa1,Ackr3,Slc8a1,Ncald,Plcg1,Ppp3r1,Dmtn,Ptprj,Camkk2,Kdr,Dmd,Hpca,Rasa3,Ptprc
GO:0007006	Mitochondrial membrane organization	58	0.410544	top	0.0065	ks	10090.ENSMUSP00000000939,10090.ENSMUSP00000000985,10090.ENSMUSP00000005431,10090.ENSMUSP00000007803,10090.ENSMUSP00000014920,10090.ENSMUSP00000016463,10090.ENSMUSP00000017831,10090.ENSMUSP00000020440,10090.ENSMUSP00000020630,10090.ENSMUSP00000022196,10090.ENSMUSP00000022419,10090.ENSMUSP00000022634,10090.ENSMUSP00000023062,10090.ENSMUSP00000023071,10090.ENSMUSP00000023507,10090.ENSMUSP00000025408…	Hip1r,Oxa1l,Letm1,Bcl2l1,Nol3,Slc25a5,Rhot1,Timm13,Hspa4,Ap3b1,Ppif,Bnip3l,Tomm22,Samm50,Gsk3b,Afg3l2,Bad,Apool,Maip1,Bcs1l,Timm10,Slc9a1,Agk,Chchd6,Tomm40,Bax,Slc25a4,Gclc,Acaa2,Rhot2,Dnajc11,Mic13,Timm29,Tmem11,Them4,Atpif1,Immt,Chchd3,Gsk3a,Bloc1s2,Pex5,Timm50,Hsp90aa1,Cnp,Camk2a,Mfn2,Ndufa13,Atf2,Apoo,Snca,Cox18,Spg7,Stat3,Mtch2,Opa1,Timm9,Sh3glb1,Tomm20
GO:0022904	Respiratory electron transport chain	58	0.465647	top	0.0065	ks	10090.ENSMUSP00000000090,10090.ENSMUSP00000005493,10090.ENSMUSP00000007012,10090.ENSMUSP00000010007,10090.ENSMUSP00000013737,10090.ENSMUSP00000014698,10090.ENSMUSP00000015256,10090.ENSMUSP00000019226,10090.ENSMUSP00000021993,10090.ENSMUSP00000022062,10090.ENSMUSP00000022097,10090.ENSMUSP00000022286,10090.ENSMUSP00000022980,10090.ENSMUSP00000023210,10090.ENSMUSP00000023760,10090.ENSMUSP00000023851…	Cox5a,Slc1a3,Sod2,Sdhb,Ndufs2,Dguok,Slc25a13,Slc25a22,Uqcrb,Sdha,Ndufs6,Ndufs4,Ndufb9,Cyc1,Gpd1,Ndufa5,Ndufb8,Uqcrc1,Ndufs1,Ndufa10,Ndufaf1,Etfdh,Ndufc2,Mecp2,Coq9,Cox4i1,Lace1,Ndufa7,Aifm1,Ndufv1,Mybbp1a,Uqcrfs1,Cox6a1,Ndufv3,Uqcrq,Uqcr10,Coa6,Ndufa8,Ndufs8,Uqcrh,Aifm2,mt-Nd2,mt-Co1,mt-Co2,mt-Nd4,mt-Nd5,Ndufb6,Cox4i2,Dld,Sdhc,Slc25a18,Snca,Cox7c,Ndufv2,Mtch2,Slc25a12,Ndufaf2,Ndufa12
GO:0043484	Regulation of rna splicing	99	0.349646	bottom	0.0065	ks	10090.ENSMUSP00000001620,10090.ENSMUSP00000005041,10090.ENSMUSP00000007007,10090.ENSMUSP00000007042,10090.ENSMUSP00000015800,10090.ENSMUSP00000018909,10090.ENSMUSP00000019118,10090.ENSMUSP00000021062,10090.ENSMUSP00000021428,10090.ENSMUSP00000021438,10090.ENSMUSP00000021630,10090.ENSMUSP00000022793,10090.ENSMUSP00000022954,10090.ENSMUSP00000023099,10090.ENSMUSP00000023749,10090.ENSMUSP00000025506…	Fxr1,U2af2,Wtap,Ik,Hspa8,Fxr2,Sart3,Ddx5,Snw1,Nova1,Akr1c6,Acin1,Khdrbs3,Slc38a2,Tmbim6,Rbm22,Rps26,Eif4a3,Ncl,BC005624,Larp7,Ptbp2,Ncbp1,Smu1,Zfp326,Srsf9,Rbm19,Tra2a,Rbm3,Ythdc1,Hnrnpk,Rbm42,Rbm17,Rbm8a,Zbtb7a,Jmjd6,Hnrnpu,Rbmxl1,Rbm25,Rbm12,Polr2a,Rbm15,Ddx17,Pik3r1,Hnrnpll,Srsf4,Sfswap,Khdrbs1,Nup98,Celf1,Srsf7,Prdx6,Snrnp70,Srek1,Npm1,Sf3b4,Hnrnph1,C1qbp,Grsf1,Thrap3,Mbnl2,Fmr1,Dazap1,Srsf2,…
GO:0017144	Drug metabolic process	12	1.49364	bottom	0.0069	afc	10090.ENSMUSP00000003137,10090.ENSMUSP00000006094,10090.ENSMUSP00000013773,10090.ENSMUSP00000021806,10090.ENSMUSP00000026552,10090.ENSMUSP00000033074,10090.ENSMUSP00000037259,10090.ENSMUSP00000044405,10090.ENSMUSP00000049394,10090.ENSMUSP00000099617,10090.ENSMUSP00000102665,10090.ENSMUSP00000130338	Cyp2c29,Cyp2d26,Cad,Tpmt,Cyp2e1,Vkorc1,Fmo1,Fmo2,Cbr1,Nos1,Fmo5,Cyp2d11
GO:0055065	Metal ion homeostasis	197	0.228744	top	0.0071	ks	10090.ENSMUSP00000000058,10090.ENSMUSP00000000199,10090.ENSMUSP00000002043,10090.ENSMUSP00000002091,10090.ENSMUSP00000002678,10090.ENSMUSP00000003754,10090.ENSMUSP00000004137,10090.ENSMUSP00000004172,10090.ENSMUSP00000005406,10090.ENSMUSP00000005431,10090.ENSMUSP00000007012,10090.ENSMUSP00000007799,10090.ENSMUSP00000010191,10090.ENSMUSP00000010804,10090.ENSMUSP00000013304,10090.ENSMUSP00000014920…	Cav2,Ncs1,Ccdc47,Bcap31,Tgfb1,Calb2,Gstm7,Hmox2,App,Letm1,Sod2,Cav1,Hyal2,Plcd1,Atp6v0d1,Nol3,Cd40,Slc12a7,Jph2,Trpv2,Dlg4,Fis1,Atp6ap1,Atp2b1,Mcu,Egfr,Gna13,Atp2a3,Chga,Mcur1,Hexb,Ero1l,Tfrc,Kng1,Sod1,Tmbim6,Rgn,Rhag,Slc39a7,Smad4,Afg3l2,Fech,Fth1,Plcb3,Got1,Mgea5,Iscu,Maip1,Slc39a10,Slc40a1,Atp1b1,Itgav,Slc12a6,F2,Casq2,Ccdc109b,Calb1,Stoml2,Slc9a1,Cdk5,Gnb1,Cd38,Tmem165,Tesc,Atp2a2,P2rx4,Kel,I…
GO:0055117	Regulation of cardiac muscle contraction	28	0.810509	top	0.0071	ks	10090.ENSMUSP00000001592,10090.ENSMUSP00000007799,10090.ENSMUSP00000020721,10090.ENSMUSP00000021610,10090.ENSMUSP00000024860,10090.ENSMUSP00000025239,10090.ENSMUSP00000027863,10090.ENSMUSP00000029454,10090.ENSMUSP00000030669,10090.ENSMUSP00000031423,10090.ENSMUSP00000031429,10090.ENSMUSP00000033699,10090.ENSMUSP00000039657,10090.ENSMUSP00000040367,10090.ENSMUSP00000043765,10090.ENSMUSP00000064280…	Jup,Cav1,Smtn,Chga,Ehd3,Bin1,Atp1b1,Casq2,Slc9a1,Atp2a2,P2rx4,Flna,Atp1a1,Trpm4,Ank2,Dlg1,Pde5a,Atp1a2,Slc8a1,Sumo1,Hsp90aa1,Ctnna3,Ace2,Dmd,Pde4d,Dsp,Sri,Agrn
GO:0000050	Urea cycle	7	2.18111	bottom	0.0072	afc	10090.ENSMUSP00000020161,10090.ENSMUSP00000027144,10090.ENSMUSP00000027810,10090.ENSMUSP00000056152,10090.ENSMUSP00000078945,10090.ENSMUSP00000099904,10090.ENSMUSP00000124274	Arg1,Cps1,Fh1,Otc,Htt,Ass1,Asl
GO:0001885	Endothelial cell development	29	0.164836	both ends	0.0072	ks	10090.ENSMUSP00000000590,10090.ENSMUSP00000004968,10090.ENSMUSP00000007130,10090.ENSMUSP00000009705,10090.ENSMUSP00000035092,10090.ENSMUSP00000041453,10090.ENSMUSP00000041907,10090.ENSMUSP00000052872,10090.ENSMUSP00000062759,10090.ENSMUSP00000063734,10090.ENSMUSP00000064048,10090.ENSMUSP00000066238,10090.ENSMUSP00000079664,10090.ENSMUSP00000081010,10090.ENSMUSP00000083587,10090.ENSMUSP00000088174…	Rdx,Plod3,Ctnnb1,Eng,Myd88,Clic4,F11r,Fasn,Sox18,Ezr,Ptprs,Rap1b,Pecam1,Gpx1,Icam1,Rap1a,Tjp2,Tjp1,Rtn4,Robo4,Dmd,Pde4d,Msn,Rapgef2,Rapgef3,Mllt4,Heg1,Myadm,Pde2a
GO:0045446	Endothelial cell differentiation	40	0.163651	both ends	0.0072	ks	10090.ENSMUSP00000000542,10090.ENSMUSP00000000590,10090.ENSMUSP00000004968,10090.ENSMUSP00000007130,10090.ENSMUSP00000009705,10090.ENSMUSP00000025393,10090.ENSMUSP00000027035,10090.ENSMUSP00000028288,10090.ENSMUSP00000032768,10090.ENSMUSP00000035092,10090.ENSMUSP00000040694,10090.ENSMUSP00000041453,10090.ENSMUSP00000041907,10090.ENSMUSP00000050897,10090.ENSMUSP00000052872,10090.ENSMUSP00000062759…	Acvrl1,Rdx,Plod3,Ctnnb1,Eng,Smad4,Sox17,Notch1,Nr2f2,Myd88,Rbpj,Clic4,F11r,S1pr1,Fasn,Sox18,Ezr,Ptprs,Rap1b,Pecam1,Gpx1,Icam1,Bmpr2,Rap1a,Tjp2,Ptn,Tjp1,Rtn4,Robo4,Pbrm1,Kdr,Dmd,Pde4d,Msn,Rapgef2,Rapgef3,Mllt4,Heg1,Myadm,Pde2a
GO:0072507	Divalent inorganic cation homeostasis	147	0.310682	top	0.0072	ks	10090.ENSMUSP00000000058,10090.ENSMUSP00000000199,10090.ENSMUSP00000002043,10090.ENSMUSP00000002091,10090.ENSMUSP00000002678,10090.ENSMUSP00000003754,10090.ENSMUSP00000004137,10090.ENSMUSP00000005406,10090.ENSMUSP00000005431,10090.ENSMUSP00000007799,10090.ENSMUSP00000010804,10090.ENSMUSP00000014920,10090.ENSMUSP00000017799,10090.ENSMUSP00000017961,10090.ENSMUSP00000018651,10090.ENSMUSP00000018700…	Cav2,Ncs1,Ccdc47,Bcap31,Tgfb1,Calb2,Gstm7,App,Letm1,Cav1,Plcd1,Nol3,Cd40,Jph2,Trpv2,Dlg4,Fis1,Atp2b1,Mcu,Egfr,Gna13,Atp2a3,Chga,Mcur1,Hexb,Ero1l,Kng1,Tmbim6,Rgn,Slc39a7,Afg3l2,Plcb3,Got1,Mgea5,Maip1,Slc39a10,Atp1b1,Itgav,F2,Casq2,Ccdc109b,Calb1,Stoml2,Cdk5,Gnb1,Cd38,Tmem165,Atp2a2,P2rx4,Kel,Itpr1,Nucb2,Bax,Stim1,Swap70,Mt3,Mt2,Mt1,Atp13a1,Cdh5,Cul5,Pik3cb,Clstn1,Fkbp1a,Sv2a,Plcl1,Itpr3,Atp2c1,Trp…
GO:0072503	Cellular divalent inorganic cation homeostasis	142	0.311345	top	0.008	ks	10090.ENSMUSP00000000058,10090.ENSMUSP00000000199,10090.ENSMUSP00000002043,10090.ENSMUSP00000002091,10090.ENSMUSP00000002678,10090.ENSMUSP00000003754,10090.ENSMUSP00000004137,10090.ENSMUSP00000005406,10090.ENSMUSP00000005431,10090.ENSMUSP00000007799,10090.ENSMUSP00000010804,10090.ENSMUSP00000014920,10090.ENSMUSP00000017799,10090.ENSMUSP00000017961,10090.ENSMUSP00000018651,10090.ENSMUSP00000018700…	Cav2,Ncs1,Ccdc47,Bcap31,Tgfb1,Calb2,Gstm7,App,Letm1,Cav1,Plcd1,Nol3,Cd40,Jph2,Trpv2,Dlg4,Fis1,Atp2b1,Mcu,Gna13,Atp2a3,Chga,Mcur1,Hexb,Ero1l,Kng1,Tmbim6,Rgn,Slc39a7,Afg3l2,Plcb3,Got1,Mgea5,Maip1,Slc39a10,Atp1b1,Itgav,F2,Casq2,Ccdc109b,Calb1,Stoml2,Cdk5,Gnb1,Cd38,Tmem165,Atp2a2,P2rx4,Kel,Itpr1,Nucb2,Bax,Stim1,Swap70,Mt3,Mt2,Mt1,Atp13a1,Cdh5,Cul5,Pik3cb,Clstn1,Fkbp1a,Sv2a,Plcl1,Itpr3,Atp2c1,Trpm4,Tp…
GO:0045088	Regulation of innate immune response	65	0.476583	bottom	0.0081	ks	10090.ENSMUSP00000003284,10090.ENSMUSP00000004145,10090.ENSMUSP00000006625,10090.ENSMUSP00000016901,10090.ENSMUSP00000017920,10090.ENSMUSP00000019615,10090.ENSMUSP00000020161,10090.ENSMUSP00000020316,10090.ENSMUSP00000020448,10090.ENSMUSP00000020500,10090.ENSMUSP00000022507,10090.ENSMUSP00000024739,10090.ENSMUSP00000025197,10090.ENSMUSP00000028914,10090.ENSMUSP00000029936,10090.ENSMUSP00000030623…	Irf3,Stat5a,Rbm14,Ttll12,Crk,Cdc37,Arg1,Tbk1,Irak3,Appl2,Pspc1,Hsp90ab1,Tap2,Polr3f,Gbp5,Sfpq,Clec2d,Pycard,Hpx,Nono,Lamp1,Parp14,Dhx9,Appl1,Dak,Grn,Gfer,Irgm1,Dnaja3,Hexim1,Cactin,Samhd1,Hmgb2,Xrcc6,Serpinb1a,Hmgb1,Lsm14a,Cadm1,Ap1g1,Plscr1,Ceacam1,Lrp8,Stat5b,Adar,Med1,Lgals9,Ythdf3,Rps19,Arrb2,Mavs,Fam3a,Hmgb3,Parp9,Pqbp1,Tmem173,Cnot7,Ythdf2,Nmi,Ifi203,Ube2k,Matr3,Nlrx1,Tap1,Sin3a,Apoe
GO:0006816	Calcium ion transport	80	0.420096	top	0.0084	ks	10090.ENSMUSP00000000199,10090.ENSMUSP00000005431,10090.ENSMUSP00000007799,10090.ENSMUSP00000010804,10090.ENSMUSP00000014920,10090.ENSMUSP00000018651,10090.ENSMUSP00000020107,10090.ENSMUSP00000020312,10090.ENSMUSP00000021142,10090.ENSMUSP00000021800,10090.ENSMUSP00000022378,10090.ENSMUSP00000025408,10090.ENSMUSP00000025912,10090.ENSMUSP00000027114,10090.ENSMUSP00000028160,10090.ENSMUSP00000028499…	Ncs1,Letm1,Cav1,Plcd1,Nol3,Trpv2,Atp2b1,Mcu,Atp2a3,Mcur1,Ero1l,Afg3l2,Plcb3,Maip1,Slc25a25,Itgav,Anxa5,Ccdc109b,Stoml2,Cdk5,Tmem165,Atp2a2,P2rx4,Sec61a1,Itpr1,Coro1a,Stim1,Cask,Gpm6a,Tmem66,Anxa2,Fkbp1a,Plcl1,Itpr3,Atp2c1,Trpm4,Tpcn1,Slc30a1,Cacna2d1,Itpr2,Ppp3ca,Zmpste24,Marcksl1,Efcab4a,Trpc6,Gja4,Prkcb,Camk2g,Ano6,Trpv4,Calcrl,Asph,Cherp,Erc1,Plcg2,Slc8a1,Atp2b2,Pawr,Tmco1,Psen1,Plcd3,Plcg1,Vd…
GO:0006941	Striated muscle contraction	32	0.737349	top	0.0084	ks	10090.ENSMUSP00000014080,10090.ENSMUSP00000018800,10090.ENSMUSP00000019076,10090.ENSMUSP00000020949,10090.ENSMUSP00000025791,10090.ENSMUSP00000027863,10090.ENSMUSP00000028991,10090.ENSMUSP00000029454,10090.ENSMUSP00000030669,10090.ENSMUSP00000031423,10090.ENSMUSP00000043724,10090.ENSMUSP00000043765,10090.ENSMUSP00000046101,10090.ENSMUSP00000049457,10090.ENSMUSP00000062256,10090.ENSMUSP00000073855…	Myl2,Myl4,Map2k3,Map2k6,Adrbk1,Atp1b1,Snta1,Casq2,Slc9a1,Atp2a2,Rcsd1,Ank2,Eef2,Cacna2d1,Adrb2,Synm,Slc8a1,Aldoa,Hsp90aa1,Mtor,Nos1,Atp1a3,Gaa,Camk2d,Myh14,Smad5,Tpm1,Dmd,Gpd1l,Srsf1,Nup155,Nedd4l
GO:0003013	Circulatory system process	152	0.394966	both ends	0.0088	ks	10090.ENSMUSP00000000287,10090.ENSMUSP00000000329,10090.ENSMUSP00000000542,10090.ENSMUSP00000001780,10090.ENSMUSP00000001963,10090.ENSMUSP00000002678,10090.ENSMUSP00000003017,10090.ENSMUSP00000004327,10090.ENSMUSP00000004968,10090.ENSMUSP00000005066,10090.ENSMUSP00000005964,10090.ENSMUSP00000007012,10090.ENSMUSP00000007799,10090.ENSMUSP00000007959,10090.ENSMUSP00000009705,10090.ENSMUSP00000014080…	Scpep1,Alox12,Acvrl1,Akt1,Ace,Tgfb1,Tbxas1,G6pdx,Plod3,Map2k1,Adh5,Sod2,Cav1,Rhoa,Eng,Myl2,Fli1,Cd34,Myl4,Map2k3,Atp2b1,Egfr,Smtn,Nampt,Rock2,Map2k6,Chga,Nisch,Kng1,Adipoq,Atp5j,Sod1,Adrbk1,Capn1,Plcb3,Alox5,Cps1,Atp1b1,Snta1,Src,Casq2,Enpep,Gclm,Ddah1,Sh3gl2,Ppcs,Mfsd2a,Slc9a1,Nos3,Ctnnbip1,Cd38,P2rx4,Col1a2,Abcg2,Nr2f2,Mecp2,Cdh5,Gclc,Akap12,Dock5,Fgg,Pde3a,Fgb,Atp1a1,Trpm4,Mif,Abcb1a,Coro2b,F1…
GO:0043113	Receptor clustering	20	1.2812	top	0.0089	afc	10090.ENSMUSP00000000299,10090.ENSMUSP00000002603,10090.ENSMUSP00000018700,10090.ENSMUSP00000025166,10090.ENSMUSP00000030814,10090.ENSMUSP00000030914,10090.ENSMUSP00000033040,10090.ENSMUSP00000033699,10090.ENSMUSP00000045468,10090.ENSMUSP00000053842,10090.ENSMUSP00000064280,10090.ENSMUSP00000080038,10090.ENSMUSP00000099073,10090.ENSMUSP00000104932,10090.ENSMUSP00000106018,10090.ENSMUSP00000109516…	Itgb2,Scrib,Dlg4,Cdh2,Cdk5,Rer1,Pak1,Flna,Ift122,Dnaja3,Dlg1,Syngap1,Ptn,Shank3,Gphn,Arhgef9,Thy1,Synj2bp,Apoe,Agrn
GO:0006942	Regulation of striated muscle contraction	31	0.730184	top	0.0096	ks	10090.ENSMUSP00000001592,10090.ENSMUSP00000004389,10090.ENSMUSP00000006626,10090.ENSMUSP00000007799,10090.ENSMUSP00000020721,10090.ENSMUSP00000021610,10090.ENSMUSP00000024860,10090.ENSMUSP00000025239,10090.ENSMUSP00000025791,10090.ENSMUSP00000027863,10090.ENSMUSP00000029454,10090.ENSMUSP00000030669,10090.ENSMUSP00000031423,10090.ENSMUSP00000031429,10090.ENSMUSP00000033699,10090.ENSMUSP00000039657…	Jup,Grcc10,Actn3,Cav1,Smtn,Chga,Ehd3,Bin1,Adrbk1,Atp1b1,Casq2,Slc9a1,Atp2a2,P2rx4,Flna,Atp1a1,Trpm4,Ank2,Dlg1,Pde5a,Atp1a2,Slc8a1,Sumo1,Hsp90aa1,Ctnna3,Ace2,Dmd,Pde4d,Dsp,Sri,Agrn

## Sheet: MF
#term ID	term description	genes mapped	enrichment score	direction	false discovery rate	method	matching proteins in your input (IDs)	matching proteins in your input (labels)
GO:0003729	mRNA binding	177	0.339236	bottom	7.4e-06	ks	10090.ENSMUSP00000000804,10090.ENSMUSP00000001620,10090.ENSMUSP00000001809,10090.ENSMUSP00000002048,10090.ENSMUSP00000003527,10090.ENSMUSP00000003912,10090.ENSMUSP00000004554,10090.ENSMUSP00000006625,10090.ENSMUSP00000007814,10090.ENSMUSP00000007980,10090.ENSMUSP00000008537,10090.ENSMUSP00000010241,10090.ENSMUSP00000018727,10090.ENSMUSP00000018909,10090.ENSMUSP00000021062,10090.ENSMUSP00000021116…	Ddx3x,Fxr1,Pabpc1,Taco1,Supt5,Calr,Rps5,Rbm14,Khsrp,Hnrnpa0,Carhsp1,Nxf1,G3bp1,Fxr2,Ddx5,Unk,Luc7l3,Nova1,Auh,Dhfr,Dcp1a,Khnyn,Cct5,Hrsp12,Khdrbs3,Ncbp2,Denr,Etf1,Fech,Rps14,Eif3a,Rps26,Eif4a3,Sf3b1,Ncl,Tsn,Cstf3,Exosc8,Dhx36,Rps3a1,Mettl14,Ptbp2,Cryz,Rnf20,Ncbp1,Pum1,Ppie,Ppp1r8,Park7,Rpl6,Cnbp,Mrps11,Rps3,Rnf40,Cstf2,Mecp2,Rbpms,Nudt21,Nudt16,Mvk,Ythdf1,Dhx9,Serbp1,Ythdc1,Hnrnpk,Pak4,Lsm1,Ago2,…
GO:0003735	Structural constituent of ribosome	107	0.504377	bottom	7.4e-06	ks	10090.ENSMUSP00000000756,10090.ENSMUSP00000001485,10090.ENSMUSP00000002844,10090.ENSMUSP00000003521,10090.ENSMUSP00000004072,10090.ENSMUSP00000004554,10090.ENSMUSP00000006496,10090.ENSMUSP00000008036,10090.ENSMUSP00000008812,10090.ENSMUSP00000008826,10090.ENSMUSP00000015816,10090.ENSMUSP00000017548,10090.ENSMUSP00000020820,10090.ENSMUSP00000022245,10090.ENSMUSP00000023269,10090.ENSMUSP00000024486…	Rpl13,Mrpl10,Mrpl2,Rps11,Rpl8,Rps5,Rps9,Rplp1,Rps18,Rpl10,Mrpl32,Rpl19,Mrpl22,Mrps30,Rpl24,Mrps23,Rps14,Mrpl21,Mrpl11,Rps26,Mrps5,Rps3a1,Mrpl9,Mrpl37,Mrps15,Mrpl33,Rpl6,Rpl28,Mrps11,Mrpl46,Rps3,Rps4x,Mrps31,Rpl4,Mrps22,Rpsa,Mrpl3,Mrps2,Mrps6,Ndufa7,Rpl21,Mrpl41,Mrpl12,Mrps34,Rps27l,Mrps35,Rpl10a,Rps23,Mrps9,Rpl18a,Rps21,Rpl37a,Mrps21,Rps15,Rpl7,Rpl26,Rps7,Rpl17,Rpl15,Rps25,Rpl36,Rps17,Rpl35,Rpl29…
GO:0015318	Inorganic molecular entity transmembrane transporter activity	192	0.506044	both ends	7.4e-06	ks	10090.ENSMUSP00000000090,10090.ENSMUSP00000000199,10090.ENSMUSP00000000619,10090.ENSMUSP00000003622,10090.ENSMUSP00000004396,10090.ENSMUSP00000004774,10090.ENSMUSP00000005431,10090.ENSMUSP00000005493,10090.ENSMUSP00000006749,10090.ENSMUSP00000007257,10090.ENSMUSP00000010251,10090.ENSMUSP00000013304,10090.ENSMUSP00000014457,10090.ENSMUSP00000014750,10090.ENSMUSP00000015256,10090.ENSMUSP00000015934…	Cox5a,Ncs1,Clcn4-2,Slc25a1,Atp6v1f,Aqp1,Letm1,Slc1a3,Slc4a1,Clic1,Slc22a8,Atp6v0d1,Cox6c,Slc25a11,Slc25a13,Surf1,Atp5e,Slc12a7,Trpv2,Slc2a4,Slc25a22,Atp6v1e1,Atp2b1,Mcu,Slc9a3r1,Atp2a3,Atp6v1d,Mrs2,Sfxn1,Vdac2,Atp6v1c1,Slc25a32,Slc38a2,Tfrc,Atp5j,Clic6,Atp5o,Rhag,Clic5,Atp6v0c,Slc39a7,Slc1a1,Atp5b,Atp5a1,Slc25a10,Slc39a10,Slc40a1,Xpr1,Tmem63a,Atp1b1,Itgav,Slc12a6,Snap25,Slc23a2,Anxa5,Slc33a1,Slc1…
GO:0005201	Extracellular matrix structural constituent	16	2.79694	top	1.05e-05	afc	10090.ENSMUSP00000001547,10090.ENSMUSP00000002979,10090.ENSMUSP00000027752,10090.ENSMUSP00000028633,10090.ENSMUSP00000029848,10090.ENSMUSP00000031668,10090.ENSMUSP00000033898,10090.ENSMUSP00000033899,10090.ENSMUSP00000043957,10090.ENSMUSP00000048803,10090.ENSMUSP00000069087,10090.ENSMUSP00000083620,10090.ENSMUSP00000085192,10090.ENSMUSP00000089793,10090.ENSMUSP00000100924,10090.ENSMUSP00000109084	Col1a1,Lamb1,Lamc1,Fbn1,Col24a1,Col1a2,Col4a1,Col4a2,Lama1,Prelp,Lamb2,Col5a2,Col3a1,Col11a1,Dcn,Col4a3
GO:0046943	Carboxylic acid transmembrane transporter activity	50	0.859988	both ends	1.05e-05	ks	10090.ENSMUSP00000003622,10090.ENSMUSP00000005493,10090.ENSMUSP00000014750,10090.ENSMUSP00000015256,10090.ENSMUSP00000019226,10090.ENSMUSP00000021077,10090.ENSMUSP00000021930,10090.ENSMUSP00000022908,10090.ENSMUSP00000023099,10090.ENSMUSP00000025875,10090.ENSMUSP00000026899,10090.ENSMUSP00000028815,10090.ENSMUSP00000029502,10090.ENSMUSP00000030269,10090.ENSMUSP00000030408,10090.ENSMUSP00000031822…	Slc25a1,Slc1a3,Slc25a11,Slc25a13,Slc25a22,Slc9a3r1,Sfxn1,Slc25a32,Slc38a2,Slc1a1,Slc25a10,Slc23a2,Slc16a4,Slc6a9,Mfsd2a,Abcg2,Slc6a6,Slco1c1,Slc6a11,Slc6a1,Slco2b1,Slc38a5,Slc25a15,Slc27a1,Slco1a1,Slc16a2,Slc7a5,Sfxn5,Slc16a1,Slc7a1,Slc6a20a,Sfxn3,Ceacam2,Slc1a2,Slc17a7,Ceacam1,Slc7a2,Slc38a10,Abcb11,Slc19a1,Slc1a5,Slc36a1,Slc1a4,Slc43a1,Slco1a6,Slc25a18,Slc25a12,Slc3a2,Slc38a3,Slco1a4
GO:0050839	Cell adhesion molecule binding	128	0.734477	top	1.05e-05	ks	10090.ENSMUSP00000000129,10090.ENSMUSP00000000299,10090.ENSMUSP00000001055,10090.ENSMUSP00000001548,10090.ENSMUSP00000001592,10090.ENSMUSP00000002011,10090.ENSMUSP00000002979,10090.ENSMUSP00000003061,10090.ENSMUSP00000003912,10090.ENSMUSP00000005256,10090.ENSMUSP00000005406,10090.ENSMUSP00000007130,10090.ENSMUSP00000015791,10090.ENSMUSP00000016771,10090.ENSMUSP00000017488,10090.ENSMUSP00000020329…	Fer,Itgb2,Icam2,Itga3,Jup,Esam,Lamb1,Bcam,Calr,Ndrg1,App,Ctnnb1,Lama5,Myh9,Vtn,Egfr,Itgb3,Actn1,Caml,Emb,Nisch,Itga5,Gsk3b,Cd2ap,Cdh2,P4hb,Itgb8,Tspan4,Itgav,Itga6,Fbn1,Src,Vcam1,Adam15,Sdcbp,Tln1,Nos3,P2rx4,Cd9,Mfge8,Ilk,Cdh5,Jam3,Rpsa,Fgg,Nexn,Fermt3,Obscn,Lyn,Ppp1ca,Fgb,Tln2,Shtn1,F11r,Cdh10,Sema7a,Cd81,Fermt2,Thbs1,Ptprm,Cpe,Ctnna1,Tspan8,Itga2,Fn1,Prkca,Ezr,Ctnnd1,Gfap,Ppap2b,Adam17,Lamb2,It…
GO:0005178	Integrin binding	75	0.88865	top	1.41e-05	ks	10090.ENSMUSP00000000299,10090.ENSMUSP00000001055,10090.ENSMUSP00000001548,10090.ENSMUSP00000002979,10090.ENSMUSP00000003912,10090.ENSMUSP00000005406,10090.ENSMUSP00000015791,10090.ENSMUSP00000016771,10090.ENSMUSP00000017488,10090.ENSMUSP00000020329,10090.ENSMUSP00000021028,10090.ENSMUSP00000021554,10090.ENSMUSP00000022469,10090.ENSMUSP00000023128,10090.ENSMUSP00000023507,10090.ENSMUSP00000026122…	Itgb2,Icam2,Itga3,Lamb1,Calr,App,Lama5,Myh9,Vtn,Egfr,Itgb3,Actn1,Nisch,Itga5,Gsk3b,P4hb,Itgb8,Tspan4,Itgav,Itga6,Fbn1,Src,Vcam1,Adam15,Tln1,Cd9,Mfge8,Ilk,Jam3,Fermt3,Lyn,Tln2,F11r,Sema7a,Cd81,Fermt2,Thbs1,Tspan8,Itga2,Fn1,Prkca,Gfap,Ppap2b,Adam17,Lamb2,Itgb5,Cxcl12,Emp2,Dab2,Edil3,Adam9,Isg15,Icam1,Pxn,Col3a1,Itgb1,Lama3,Itga7,Lgals8,Anxa7,Ptn,L1cam,Cd151,Itgb4,Nf2,Ptk2,Tnr,Vwf,Col4a3,Kdr,Dmd,Jam…
GO:0008514	Organic anion transmembrane transporter activity	71	0.760793	both ends	1.41e-05	ks	10090.ENSMUSP00000001109,10090.ENSMUSP00000002084,10090.ENSMUSP00000003622,10090.ENSMUSP00000005493,10090.ENSMUSP00000006749,10090.ENSMUSP00000010251,10090.ENSMUSP00000014750,10090.ENSMUSP00000015256,10090.ENSMUSP00000016463,10090.ENSMUSP00000019226,10090.ENSMUSP00000021077,10090.ENSMUSP00000021930,10090.ENSMUSP00000022908,10090.ENSMUSP00000023099,10090.ENSMUSP00000025875,10090.ENSMUSP00000026899…	Mfsd10,Abcd1,Slc25a1,Slc1a3,Slc4a1,Slc22a8,Slc25a11,Slc25a13,Slc25a5,Slc25a22,Slc9a3r1,Sfxn1,Slc25a32,Slc38a2,Slc1a1,Slc25a10,Slc25a25,Slc23a2,Slc33a1,Slc25a24,Slc16a4,Slc35a1,Slc6a9,Slc2a1,Mfsd2a,Abcg2,Slc6a6,Slco1c1,Slc6a11,Slc6a1,Slc2a3,Slco2b1,Slc38a5,Slc25a15,Slc25a4,Slc27a1,Slco1a1,Slc16a2,Slc7a5,Sfxn5,Slc16a1,Slc7a1,Slc6a20a,Slc4a7,Sfxn3,Ceacam2,Gja1,Slc25a40,Slc52a3,Slc1a2,Slc25a36,Slc17a…
GO:0015077	Monovalent inorganic cation transmembrane transporter activity	83	0.547222	top	2.35e-05	ks	10090.ENSMUSP00000000090,10090.ENSMUSP00000000619,10090.ENSMUSP00000004396,10090.ENSMUSP00000004774,10090.ENSMUSP00000005431,10090.ENSMUSP00000005493,10090.ENSMUSP00000013304,10090.ENSMUSP00000014457,10090.ENSMUSP00000015934,10090.ENSMUSP00000016396,10090.ENSMUSP00000017900,10090.ENSMUSP00000018710,10090.ENSMUSP00000019354,10090.ENSMUSP00000021142,10090.ENSMUSP00000021536,10090.ENSMUSP00000022904…	Cox5a,Clcn4-2,Atp6v1f,Aqp1,Letm1,Slc1a3,Atp6v0d1,Cox6c,Surf1,Atp5e,Slc12a7,Slc2a4,Atp6v1e1,Atp2a3,Atp6v1d,Atp6v1c1,Slc38a2,Atp5j,Atp5o,Rhag,Atp6v0c,Slc1a1,Atp5b,Atp5a1,Atp1b1,Slc12a6,Snap25,Slc23a2,Slc33a1,Slc6a9,Mfsd2a,Slc9a1,Atp2a2,Ndufa4,Slc6a6,Slc6a11,Slc6a1,Cox4i1,Cox7a2,Atp1b3,Slc12a9,Atp2c1,Atp1a1,Atp6v0a2,Atp6v1h,Tpcn1,Atp6v0a1,Atp1b2,Cox6a1,Atp6v1g1,Atp5k,Kcnj10,Kcna1,Cpox,Slc4a7,Atp6v1g…
GO:0003682	Chromatin binding	191	0.420172	bottom	2.45e-05	ks	10090.ENSMUSP00000000767,10090.ENSMUSP00000002121,10090.ENSMUSP00000002699,10090.ENSMUSP00000002733,10090.ENSMUSP00000002911,10090.ENSMUSP00000003527,10090.ENSMUSP00000003529,10090.ENSMUSP00000003645,10090.ENSMUSP00000004202,10090.ENSMUSP00000004494,10090.ENSMUSP00000005503,10090.ENSMUSP00000005616,10090.ENSMUSP00000005705,10090.ENSMUSP00000005841,10090.ENSMUSP00000006301,10090.ENSMUSP00000006774…	Rpa1,Supt6,Akap8,Gtf2f1,Hdgfrp2,Supt5,Paf1,Ercc1,Dnmt1,Sin3b,Msh6,Pkn1,Trim28,Ctcf,Lrwd1,Gtf2h1,Ctnnb1,Mta1,Gabpa,Cdk9,Ankrd17,H2afy,Fli1,Dnttip1,Top2b,Hdac2,H2afy2,Egfr,Wdr82,Sap30l,Ddx5,Vrk1,Fam208a,Rad21,Crebbp,Ercc4,Smarcd1,Calcoco1,Prmt5,Msh2,Zeb1,Ring1,Ercc3,Csnk2b,Smad4,Smarca2,Rela,Smc3,Shmt2,Sf3b1,Parp1,Brd3,Notch1,Pcna,Actl6a,Lef1,Nfkb1,Gtf2b,Rnf20,Pole3,Psip1,Sfpq,Dnajc2,Nelfa,Polr2b,S…
GO:0008509	Anion transmembrane transporter activity	98	0.652847	both ends	6.8e-05	ks	10090.ENSMUSP00000000619,10090.ENSMUSP00000001109,10090.ENSMUSP00000002084,10090.ENSMUSP00000003622,10090.ENSMUSP00000005493,10090.ENSMUSP00000006749,10090.ENSMUSP00000007257,10090.ENSMUSP00000010251,10090.ENSMUSP00000014750,10090.ENSMUSP00000015256,10090.ENSMUSP00000016463,10090.ENSMUSP00000017900,10090.ENSMUSP00000019226,10090.ENSMUSP00000021077,10090.ENSMUSP00000021930,10090.ENSMUSP00000022293…	Clcn4-2,Mfsd10,Abcd1,Slc25a1,Slc1a3,Slc4a1,Clic1,Slc22a8,Slc25a11,Slc25a13,Slc25a5,Slc12a7,Slc25a22,Slc9a3r1,Sfxn1,Vdac2,Slc25a32,Slc38a2,Clic6,Clic5,Slc1a1,Slc25a10,Xpr1,Slc25a25,Slc12a6,Slc23a2,Slc33a1,Slc25a24,Slc16a4,Gpr89,Slc35a1,Slc6a9,Slc2a1,Mfsd2a,Slc9a1,Abcg2,Pcyox1,Slc6a6,Slco1c1,Slc6a11,Slc6a1,Slc2a3,Slco2b1,Slc38a5,Slc25a15,Slc25a4,Slc27a1,Clcn7,Slco1a1,Slc16a2,Ttyh2,Slc12a9,Clic4,Slc…
GO:0008324	Cation transmembrane transporter activity	150	0.302076	top	0.00015	ks	10090.ENSMUSP00000000090,10090.ENSMUSP00000000199,10090.ENSMUSP00000000619,10090.ENSMUSP00000004396,10090.ENSMUSP00000004774,10090.ENSMUSP00000005431,10090.ENSMUSP00000005493,10090.ENSMUSP00000010251,10090.ENSMUSP00000013304,10090.ENSMUSP00000014457,10090.ENSMUSP00000015934,10090.ENSMUSP00000016396,10090.ENSMUSP00000017900,10090.ENSMUSP00000018651,10090.ENSMUSP00000018710,10090.ENSMUSP00000019354…	Cox5a,Ncs1,Clcn4-2,Atp6v1f,Aqp1,Letm1,Slc1a3,Slc22a8,Atp6v0d1,Cox6c,Surf1,Atp5e,Slc12a7,Trpv2,Slc2a4,Atp6v1e1,Atp2b1,Mcu,Atp2a3,Atp6v1d,Mrs2,Sfxn1,Atp6v1c1,Slc38a2,Tfrc,Atp5j,Atp5o,Rhag,Atp6v0c,Slc39a7,Slc1a1,Atp5b,Atp5a1,Slc39a10,Slc40a1,Tmem63a,Atp1b1,Itgav,Slc12a6,Snap25,Slc23a2,Anxa5,Slc33a1,Slc6a9,Mfsd2a,Slc9a1,Cdk5,Tmem165,Atp2a2,P2rx4,Ndufa4,Abcg2,Sec61a1,Slc6a6,Itpr1,Slc6a11,Slc6a1,Tomm40…
GO:0022890	Inorganic cation transmembrane transporter activity	132	0.370119	top	0.00027	ks	10090.ENSMUSP00000000090,10090.ENSMUSP00000000199,10090.ENSMUSP00000000619,10090.ENSMUSP00000004396,10090.ENSMUSP00000004774,10090.ENSMUSP00000005431,10090.ENSMUSP00000005493,10090.ENSMUSP00000013304,10090.ENSMUSP00000014457,10090.ENSMUSP00000015934,10090.ENSMUSP00000016396,10090.ENSMUSP00000017900,10090.ENSMUSP00000018651,10090.ENSMUSP00000018710,10090.ENSMUSP00000019354,10090.ENSMUSP00000020107…	Cox5a,Ncs1,Clcn4-2,Atp6v1f,Aqp1,Letm1,Slc1a3,Atp6v0d1,Cox6c,Surf1,Atp5e,Slc12a7,Trpv2,Slc2a4,Atp6v1e1,Atp2b1,Mcu,Atp2a3,Atp6v1d,Mrs2,Atp6v1c1,Slc38a2,Tfrc,Atp5j,Atp5o,Rhag,Atp6v0c,Slc39a7,Slc1a1,Atp5b,Atp5a1,Slc39a10,Slc40a1,Tmem63a,Atp1b1,Itgav,Slc12a6,Snap25,Slc23a2,Anxa5,Slc33a1,Slc6a9,Mfsd2a,Slc9a1,Cdk5,Tmem165,Atp2a2,P2rx4,Ndufa4,Sec61a1,Slc6a6,Itpr1,Slc6a11,Slc6a1,Tomm40,Stim1,Gpm6a,Cox4i1,…
GO:0046873	Metal ion transmembrane transporter activity	85	0.611307	both ends	0.00027	ks	10090.ENSMUSP00000000199,10090.ENSMUSP00000004774,10090.ENSMUSP00000005431,10090.ENSMUSP00000005493,10090.ENSMUSP00000017900,10090.ENSMUSP00000018651,10090.ENSMUSP00000020107,10090.ENSMUSP00000020312,10090.ENSMUSP00000021142,10090.ENSMUSP00000021772,10090.ENSMUSP00000023099,10090.ENSMUSP00000023486,10090.ENSMUSP00000025186,10090.ENSMUSP00000025875,10090.ENSMUSP00000027131,10090.ENSMUSP00000027137…	Ncs1,Aqp1,Letm1,Slc1a3,Slc12a7,Trpv2,Atp2b1,Mcu,Atp2a3,Mrs2,Slc38a2,Tfrc,Slc39a7,Slc1a1,Slc39a10,Slc40a1,Atp1b1,Itgav,Slc12a6,Snap25,Slc23a2,Anxa5,Slc6a9,Mfsd2a,Slc9a1,Cdk5,Tmem165,Atp2a2,P2rx4,Sec61a1,Slc6a6,Itpr1,Slc6a11,Slc6a1,Stim1,Gpm6a,Anxa2,Atp1b3,Slc12a9,Itpr3,Atp2c1,Atp1a1,Trpm4,Tpcn1,Slc30a1,Zdhhc17,Atp1b2,Cacna2d1,Itpr2,Mmgt1,Kcnj10,Kcna1,Cpox,Marcksl1,Trpc6,Slc4a7,Atp7a,Slc30a7,Trpv4,…
GO:0022804	Active transmembrane transporter activity	103	0.51847	both ends	0.00032	ks	10090.ENSMUSP00000000619,10090.ENSMUSP00000002084,10090.ENSMUSP00000003622,10090.ENSMUSP00000003717,10090.ENSMUSP00000004396,10090.ENSMUSP00000005431,10090.ENSMUSP00000005493,10090.ENSMUSP00000006749,10090.ENSMUSP00000010251,10090.ENSMUSP00000013304,10090.ENSMUSP00000014750,10090.ENSMUSP00000016396,10090.ENSMUSP00000016463,10090.ENSMUSP00000017900,10090.ENSMUSP00000018710,10090.ENSMUSP00000019226…	Clcn4-2,Abcd1,Slc25a1,Abcb4,Atp6v1f,Letm1,Slc1a3,Slc4a1,Slc22a8,Atp6v0d1,Slc25a11,Atp5e,Slc25a5,Slc12a7,Slc2a4,Slc25a22,Atp6v1e1,Atp2b1,Mcu,Atp2a3,Atp6v1d,Abcd4,Atp6v1c1,Slc38a2,Atp6v0c,Tap2,Slc1a1,Atp5b,Slc25a10,Atp1b1,Slc12a6,Slc23a2,Anxa5,Slc33a1,Slc16a4,Abcd3,Slc35a1,Slc6a9,Mfsd2a,Slc9a1,Atp2a2,Abcg2,Pcyox1,Slc6a6,Slco1c1,Slc6a11,Slc6a1,Slco2b1,Timm17b,Abcb7,Slc25a4,Atp1b3,Clcn7,Abca9,Slco1a1…
GO:0005509	Calcium ion binding	200	0.355093	both ends	0.0006	ks	10090.ENSMUSP00000000199,10090.ENSMUSP00000001595,10090.ENSMUSP00000001845,10090.ENSMUSP00000001920,10090.ENSMUSP00000002043,10090.ENSMUSP00000002885,10090.ENSMUSP00000003754,10090.ENSMUSP00000003912,10090.ENSMUSP00000005532,10090.ENSMUSP00000006128,10090.ENSMUSP00000006626,10090.ENSMUSP00000008907,10090.ENSMUSP00000010804,10090.ENSMUSP00000014080,10090.ENSMUSP00000014221,10090.ENSMUSP00000014920…	Ncs1,Fkbp10,Capns1,Aif1l,Ccdc47,Epdr1,Calb2,Calr,Nid1,Rcn1,Actn3,Man1a2,Plcd1,Myl2,Chp1,Nol3,Slc25a13,Rhot1,Sparc,Myl4,Rcn3,Canx,Atp2a3,Actn1,Cetn3,Pdcd6,Nid2,Anxa11,Pros1,Rgn,Creld2,Ehd3,Cdh2,Aif1,Anxa1,Ehd1,Mbl2,Capn1,Plcb3,Esyt1,Atp5b,Cps1,Ncl,Spta1,Slc25a25,Gsn,Notch1,Fbn1,F2,Jag1,Ehd4,Anxa5,Casq2,Slc25a24,S100a11,Calb1,Padi2,Sparcl1,Tesc,Psph,Atp2a2,Anxa3,Calu,Fkbp9,Itpr1,Creld1,Nucb2,Mylpf,…
GO:1901618	Organic hydroxy compound transmembrane transporter activity	10	2.07162	bottom	0.001	afc	10090.ENSMUSP00000004774,10090.ENSMUSP00000032362,10090.ENSMUSP00000032985,10090.ENSMUSP00000037022,10090.ENSMUSP00000045216,10090.ENSMUSP00000064255,10090.ENSMUSP00000096266,10090.ENSMUSP00000099771,10090.ENSMUSP00000107458,10090.ENSMUSP00000130746	Aqp1,Slco1c1,Slco2b1,Slco1a1,Slc16a1,Ceacam2,Ceacam1,Abcb11,Slco1a6,Slco1a4
GO:0015179	L-amino acid transmembrane transporter activity	22	0.960397	both ends	0.0013	ks	10090.ENSMUSP00000005493,10090.ENSMUSP00000015256,10090.ENSMUSP00000019226,10090.ENSMUSP00000021930,10090.ENSMUSP00000023099,10090.ENSMUSP00000025875,10090.ENSMUSP00000030269,10090.ENSMUSP00000033512,10090.ENSMUSP00000033871,10090.ENSMUSP00000041557,10090.ENSMUSP00000046714,10090.ENSMUSP00000047690,10090.ENSMUSP00000079100,10090.ENSMUSP00000082489,10090.ENSMUSP00000096414,10090.ENSMUSP00000104136…	Slc1a3,Slc25a13,Slc25a22,Sfxn1,Slc38a2,Slc1a1,Slc6a9,Slc38a5,Slc25a15,Slc7a5,Slc7a1,Slc6a20a,Slc1a2,Slc17a7,Slc7a2,Slc1a5,Slc36a1,Slc1a4,Slc43a1,Slc25a18,Slc25a12,Slc38a3
GO:0003954	NADH dehydrogenase activity	24	0.465047	top	0.0016	ks	10090.ENSMUSP00000005647,10090.ENSMUSP00000013737,10090.ENSMUSP00000014438,10090.ENSMUSP00000022286,10090.ENSMUSP00000023514,10090.ENSMUSP00000023851,10090.ENSMUSP00000026222,10090.ENSMUSP00000027111,10090.ENSMUSP00000027478,10090.ENSMUSP00000032882,10090.ENSMUSP00000037341,10090.ENSMUSP00000039692,10090.ENSMUSP00000042967,10090.ENSMUSP00000074600,10090.ENSMUSP00000080991,10090.ENSMUSP00000080992…	Ndufs3,Ndufs2,Ndufa2,Ndufs4,Ndufb4,Ndufa5,Ndufb8,Ndufs1,Ndufa10,Ndufc2,Ndufb7,Ndufa7,Ndufv1,Ndufs8,mt-Nd1,mt-Nd2,mt-Nd4,mt-Nd5,Ndufa9,Ndufs7,Ndufa13,Ndufv2,Ndufaf2,Ndufa12
GO:0015291	Secondary active transmembrane transporter activity	55	0.774358	both ends	0.0025	ks	10090.ENSMUSP00000000619,10090.ENSMUSP00000003622,10090.ENSMUSP00000005431,10090.ENSMUSP00000005493,10090.ENSMUSP00000006749,10090.ENSMUSP00000010251,10090.ENSMUSP00000014750,10090.ENSMUSP00000016463,10090.ENSMUSP00000017900,10090.ENSMUSP00000018710,10090.ENSMUSP00000019226,10090.ENSMUSP00000020312,10090.ENSMUSP00000023099,10090.ENSMUSP00000025875,10090.ENSMUSP00000026899,10090.ENSMUSP00000028549…	Clcn4-2,Slc25a1,Letm1,Slc1a3,Slc4a1,Slc22a8,Slc25a11,Slc25a5,Slc12a7,Slc2a4,Slc25a22,Mcu,Slc38a2,Slc1a1,Slc25a10,Slc12a6,Slc23a2,Slc33a1,Slc16a4,Slc35a1,Slc6a9,Mfsd2a,Slc9a1,Slc6a6,Slco1c1,Slc6a11,Slc6a1,Slco2b1,Slc25a4,Clcn7,Slco1a1,Slc16a2,Slc12a9,Slc16a1,Slc6a20a,Slc4a7,Slc25a3,Slc4a2,Slc1a2,Slc17a7,Slc8a1,Slc4a10,Atp1a3,Slc19a1,Slc1a5,Slc36a1,Slc1a4,Slco1a6,Slc25a18,Slc12a2,Slc12a4,Slc4a4,Slc…
GO:0019829	ATPase-coupled cation transmembrane transporter activity	31	0.630233	top	0.0025	ks	10090.ENSMUSP00000004396,10090.ENSMUSP00000013304,10090.ENSMUSP00000016396,10090.ENSMUSP00000019354,10090.ENSMUSP00000020107,10090.ENSMUSP00000021142,10090.ENSMUSP00000021536,10090.ENSMUSP00000022904,10090.ENSMUSP00000024932,10090.ENSMUSP00000026459,10090.ENSMUSP00000027863,10090.ENSMUSP00000029266,10090.ENSMUSP00000031423,10090.ENSMUSP00000034983,10090.ENSMUSP00000039103,10090.ENSMUSP00000039657…	Atp6v1f,Atp6v0d1,Atp5e,Atp6v1e1,Atp2b1,Atp2a3,Atp6v1d,Atp6v1c1,Atp6v0c,Atp5b,Atp1b1,Anxa5,Atp2a2,Atp1b3,Atp2c1,Atp1a1,Atp6v0a2,Atp6v1h,Atp6v0a1,Atp1b2,Atp6v1g1,Cpox,Atp7a,Atp6v1g2,Atp1a2,Abcc9,Atp2b2,Atp1a3,Atp1a4,Atp6v1a,Atp2b4
GO:0008137	NADH dehydrogenase (ubiquinone) activity	23	0.474242	top	0.0031	ks	10090.ENSMUSP00000005647,10090.ENSMUSP00000013737,10090.ENSMUSP00000014438,10090.ENSMUSP00000022286,10090.ENSMUSP00000023514,10090.ENSMUSP00000023851,10090.ENSMUSP00000026222,10090.ENSMUSP00000027111,10090.ENSMUSP00000027478,10090.ENSMUSP00000032882,10090.ENSMUSP00000037341,10090.ENSMUSP00000039692,10090.ENSMUSP00000042967,10090.ENSMUSP00000074600,10090.ENSMUSP00000080991,10090.ENSMUSP00000080992…	Ndufs3,Ndufs2,Ndufa2,Ndufs4,Ndufb4,Ndufa5,Ndufb8,Ndufs1,Ndufa10,Ndufc2,Ndufb7,Ndufa7,Ndufv1,Ndufs8,mt-Nd1,mt-Nd2,mt-Nd4,mt-Nd5,Ndufs7,Ndufa13,Ndufv2,Ndufaf2,Ndufa12
GO:0015078	Proton transmembrane transporter activity	45	0.421829	top	0.0031	ks	10090.ENSMUSP00000000090,10090.ENSMUSP00000000619,10090.ENSMUSP00000004396,10090.ENSMUSP00000005431,10090.ENSMUSP00000013304,10090.ENSMUSP00000014457,10090.ENSMUSP00000015934,10090.ENSMUSP00000016396,10090.ENSMUSP00000018710,10090.ENSMUSP00000019354,10090.ENSMUSP00000021142,10090.ENSMUSP00000021536,10090.ENSMUSP00000022904,10090.ENSMUSP00000023608,10090.ENSMUSP00000023677,10090.ENSMUSP00000024932…	Cox5a,Clcn4-2,Atp6v1f,Letm1,Atp6v0d1,Cox6c,Surf1,Atp5e,Slc2a4,Atp6v1e1,Atp2a3,Atp6v1d,Atp6v1c1,Atp5j,Atp5o,Atp6v0c,Atp5b,Atp5a1,Slc33a1,Slc9a1,Atp2a2,Ndufa4,Cox4i1,Cox7a2,Atp2c1,Atp6v0a2,Atp6v1h,Atp6v0a1,Cox6a1,Atp6v1g1,Atp5k,Atp6v1g2,mt-Co1,mt-Co2,Atp5d,Atp5h,Atp5g1,Slc36a1,Cox4i2,Atp6v1a,Atp5c1,Atp5f1,Cox7c,Atp5j2,Cox7a2l
GO:0015171	Amino acid transmembrane transporter activity	29	0.805814	both ends	0.0039	ks	10090.ENSMUSP00000005493,10090.ENSMUSP00000015256,10090.ENSMUSP00000019226,10090.ENSMUSP00000021077,10090.ENSMUSP00000021930,10090.ENSMUSP00000023099,10090.ENSMUSP00000025875,10090.ENSMUSP00000030269,10090.ENSMUSP00000032185,10090.ENSMUSP00000032451,10090.ENSMUSP00000032454,10090.ENSMUSP00000033512,10090.ENSMUSP00000033871,10090.ENSMUSP00000041557,10090.ENSMUSP00000046714,10090.ENSMUSP00000047690…	Slc1a3,Slc25a13,Slc25a22,Slc9a3r1,Sfxn1,Slc38a2,Slc1a1,Slc6a9,Slc6a6,Slc6a11,Slc6a1,Slc38a5,Slc25a15,Slc7a5,Slc7a1,Slc6a20a,Sfxn3,Slc1a2,Slc17a7,Slc7a2,Slc38a10,Slc1a5,Slc36a1,Slc1a4,Slc43a1,Slc25a18,Slc25a12,Slc3a2,Slc38a3
GO:0000978	RNA polymerase II cis-regulatory region sequence-specific DNA binding	109	0.319624	bottom	0.0045	ks	10090.ENSMUSP00000001326,10090.ENSMUSP00000003284,10090.ENSMUSP00000004145,10090.ENSMUSP00000005017,10090.ENSMUSP00000005406,10090.ENSMUSP00000005600,10090.ENSMUSP00000005841,10090.ENSMUSP00000009099,10090.ENSMUSP00000009120,10090.ENSMUSP00000009699,10090.ENSMUSP00000009877,10090.ENSMUSP00000016231,10090.ENSMUSP00000018748,10090.ENSMUSP00000019911,10090.ENSMUSP00000020268,10090.ENSMUSP00000020461…	Sp1,Irf3,Stat5a,Hdgf,App,Rfx1,Ctcf,Mta1,Gabpa,Cdk9,Tfcp2,Fli1,Tbx3,Hdac2,Ccar1,Nfic,Yy1,Pspc1,Sub1,Calcoco1,Prmt5,Zeb1,Smad4,Drap1,Rela,Notch1,Zfp639,Dhx36,Lef1,Nfkb1,Rad23b,Cc2d1b,Sfpq,Nono,Hcfc1,Smarca4,Foxj3,Rxrb,Dhx9,Hnrnpk,Rbpj,Nfya,Tsc22d1,Mybbp1a,Arntl,Cc2d1a,Zbtb7a,Hnrnpu,Rbmxl1,Nfib,Foxl2,Tead1,Sox18,Stat1,Yap1,Hmga2,Wbp2,Preb,Nfia,Ybx1,Zfp422,Thrap3,Ebf1,Tardbp,Med12,Stat6,Safb,Nr3c1,Lr…
GO:0008028	Monocarboxylic acid transmembrane transporter activity	20	1.1117	bottom	0.0045	afc	10090.ENSMUSP00000021077,10090.ENSMUSP00000029502,10090.ENSMUSP00000030408,10090.ENSMUSP00000031822,10090.ENSMUSP00000032185,10090.ENSMUSP00000032362,10090.ENSMUSP00000032451,10090.ENSMUSP00000032454,10090.ENSMUSP00000032985,10090.ENSMUSP00000033512,10090.ENSMUSP00000034267,10090.ENSMUSP00000037022,10090.ENSMUSP00000037629,10090.ENSMUSP00000045216,10090.ENSMUSP00000064255,10090.ENSMUSP00000096266…	Slc9a3r1,Slc16a4,Mfsd2a,Abcg2,Slc6a6,Slco1c1,Slc6a11,Slc6a1,Slco2b1,Slc38a5,Slc27a1,Slco1a1,Slc16a2,Slc16a1,Ceacam2,Ceacam1,Abcb11,Slco1a6,Slc38a3,Slco1a4
GO:0070330	Aromatase activity	4	3.32757	bottom	0.0045	afc	10090.ENSMUSP00000003137,10090.ENSMUSP00000006094,10090.ENSMUSP00000026552,10090.ENSMUSP00000130338	Cyp2c29,Cyp2d26,Cyp2e1,Cyp2d11
GO:1990837	Sequence-specific double-stranded dna binding	177	0.268874	bottom	0.0045	ks	10090.ENSMUSP00000000925,10090.ENSMUSP00000001326,10090.ENSMUSP00000003284,10090.ENSMUSP00000004145,10090.ENSMUSP00000005017,10090.ENSMUSP00000005406,10090.ENSMUSP00000005600,10090.ENSMUSP00000005841,10090.ENSMUSP00000009099,10090.ENSMUSP00000009120,10090.ENSMUSP00000009699,10090.ENSMUSP00000009877,10090.ENSMUSP00000016081,10090.ENSMUSP00000016231,10090.ENSMUSP00000017961,10090.ENSMUSP00000018748…	Smarcb1,Sp1,Irf3,Stat5a,Hdgf,App,Rfx1,Ctcf,Mta1,Gabpa,Cdk9,Tfcp2,H2afy,Fli1,Jph2,Tbx3,Hdac2,Ccar1,H2afy2,Nfic,Yy1,Pspc1,Sub1,Crebbp,Kmt2d,Calcoco1,Prmt5,Cdc5l,Msh2,Zeb1,Smad4,Cxxc1,Lmnb1,Drap1,Smarca2,Rela,Prdx5,Rptor,Sox17,Orc2,Parp1,Notch1,Xrn2,Zfp639,Dhx36,Lef1,Nfkb1,Gtf2b,Rad23b,Cc2d1b,Sfpq,Dr1,Cbx3,Cnbp,Nr2f2,Nono,Hcfc1,Carm1,Smarca4,Arid4a,Foxj3,Cdk13,Rxrb,Dhx9,Hnrnpk,Rbpj,Lonp1,Ago2,Nfya,T…
GO:0000987	Cis-regulatory region sequence-specific dna binding	116	0.316004	bottom	0.0051	ks	10090.ENSMUSP00000001326,10090.ENSMUSP00000003284,10090.ENSMUSP00000004145,10090.ENSMUSP00000005017,10090.ENSMUSP00000005406,10090.ENSMUSP00000005600,10090.ENSMUSP00000005841,10090.ENSMUSP00000009099,10090.ENSMUSP00000009120,10090.ENSMUSP00000009699,10090.ENSMUSP00000009877,10090.ENSMUSP00000016231,10090.ENSMUSP00000018748,10090.ENSMUSP00000019911,10090.ENSMUSP00000020268,10090.ENSMUSP00000020461…	Sp1,Irf3,Stat5a,Hdgf,App,Rfx1,Ctcf,Mta1,Gabpa,Cdk9,Tfcp2,Fli1,Tbx3,Hdac2,Ccar1,Nfic,Yy1,Pspc1,Sub1,Crebbp,Calcoco1,Prmt5,Zeb1,Smad4,Cxxc1,Drap1,Rela,Rptor,Notch1,Zfp639,Dhx36,Lef1,Nfkb1,Rad23b,Cc2d1b,Sfpq,Nono,Hcfc1,Smarca4,Foxj3,Rxrb,Dhx9,Hnrnpk,Rbpj,Nfya,Tsc22d1,Mybbp1a,Arntl,Cc2d1a,Zbtb7a,Hnrnpu,Rbmxl1,Nfib,Foxl2,Tead1,Sox18,Hmgb2,Stat1,Yap1,Rai1,Hmga2,Wbp2,Preb,Nfia,Ybx1,Zfp422,Thrap3,Ebf1,Ta…
GO:0001067	Regulatory region nucleic acid binding	172	0.260344	bottom	0.0054	ks	10090.ENSMUSP00000000925,10090.ENSMUSP00000001326,10090.ENSMUSP00000003284,10090.ENSMUSP00000004145,10090.ENSMUSP00000005017,10090.ENSMUSP00000005406,10090.ENSMUSP00000005600,10090.ENSMUSP00000005841,10090.ENSMUSP00000009099,10090.ENSMUSP00000009120,10090.ENSMUSP00000009699,10090.ENSMUSP00000009877,10090.ENSMUSP00000016081,10090.ENSMUSP00000016231,10090.ENSMUSP00000017961,10090.ENSMUSP00000018748…	Smarcb1,Sp1,Irf3,Stat5a,Hdgf,App,Rfx1,Ctcf,Mta1,Gabpa,Cdk9,Tfcp2,H2afy,Fli1,Jph2,Tbx3,Hdac2,Ccar1,H2afy2,Nfic,Yy1,Pspc1,Sub1,Crebbp,Kmt2d,Calcoco1,Prmt5,Cdc5l,Zeb1,Smad4,Cxxc1,Drap1,Smarca2,Rela,Prdx5,Rptor,Sox17,Parp1,Notch1,Xrn2,Zfp639,Dhx36,Lef1,Nfkb1,Gtf2b,Rad23b,Cc2d1b,Sfpq,Dr1,Cbx3,Cnbp,Nr2f2,Nono,Hcfc1,Carm1,Smarca4,Arid4a,Foxj3,Cdk13,Rxrb,Dhx9,Hnrnpk,Rbpj,Lonp1,Ago2,Nfya,Tsc22d1,Mybbp1a,A…
GO:0000977	RNA polymerase II transcription regulatory region sequence-specific DNA binding	128	0.262704	bottom	0.0055	ks	10090.ENSMUSP00000001326,10090.ENSMUSP00000003284,10090.ENSMUSP00000004145,10090.ENSMUSP00000005017,10090.ENSMUSP00000005406,10090.ENSMUSP00000005600,10090.ENSMUSP00000005841,10090.ENSMUSP00000009099,10090.ENSMUSP00000009120,10090.ENSMUSP00000009699,10090.ENSMUSP00000009877,10090.ENSMUSP00000016081,10090.ENSMUSP00000016231,10090.ENSMUSP00000018748,10090.ENSMUSP00000019911,10090.ENSMUSP00000020268…	Sp1,Irf3,Stat5a,Hdgf,App,Rfx1,Ctcf,Mta1,Gabpa,Cdk9,Tfcp2,H2afy,Fli1,Tbx3,Hdac2,Ccar1,H2afy2,Nfic,Yy1,Pspc1,Sub1,Crebbp,Calcoco1,Prmt5,Cdc5l,Zeb1,Smad4,Drap1,Rela,Parp1,Notch1,Zfp639,Dhx36,Lef1,Nfkb1,Gtf2b,Rad23b,Cc2d1b,Sfpq,Cnbp,Nr2f2,Nono,Hcfc1,Smarca4,Foxj3,Rxrb,Dhx9,Hnrnpk,Rbpj,Nfya,Tsc22d1,Mybbp1a,Arntl,Cc2d1a,Zbtb7a,Hnrnpu,Rbmxl1,Foxc1,Nfib,Foxl2,Pura,Tead1,Sox18,Purg,Cggbp1,Actn4,Stat1,Yap1…
GO:0000976	Transcription regulatory region sequence-specific dna binding	169	0.260374	bottom	0.006	ks	10090.ENSMUSP00000000925,10090.ENSMUSP00000001326,10090.ENSMUSP00000003284,10090.ENSMUSP00000004145,10090.ENSMUSP00000005017,10090.ENSMUSP00000005406,10090.ENSMUSP00000005600,10090.ENSMUSP00000005841,10090.ENSMUSP00000009099,10090.ENSMUSP00000009120,10090.ENSMUSP00000009699,10090.ENSMUSP00000009877,10090.ENSMUSP00000016081,10090.ENSMUSP00000016231,10090.ENSMUSP00000017961,10090.ENSMUSP00000018748…	Smarcb1,Sp1,Irf3,Stat5a,Hdgf,App,Rfx1,Ctcf,Mta1,Gabpa,Cdk9,Tfcp2,H2afy,Fli1,Jph2,Tbx3,Hdac2,Ccar1,H2afy2,Nfic,Yy1,Pspc1,Sub1,Crebbp,Kmt2d,Calcoco1,Prmt5,Cdc5l,Zeb1,Smad4,Cxxc1,Drap1,Smarca2,Rela,Prdx5,Rptor,Sox17,Parp1,Notch1,Xrn2,Zfp639,Dhx36,Lef1,Nfkb1,Gtf2b,Rad23b,Cc2d1b,Sfpq,Dr1,Cbx3,Cnbp,Nr2f2,Nono,Hcfc1,Carm1,Smarca4,Arid4a,Foxj3,Cdk13,Rxrb,Dhx9,Hnrnpk,Rbpj,Lonp1,Ago2,Nfya,Tsc22d1,Mybbp1a,A…
GO:0005319	Lipid transporter activity	52	0.656962	bottom	0.0072	ks	10090.ENSMUSP00000000608,10090.ENSMUSP00000002084,10090.ENSMUSP00000003717,10090.ENSMUSP00000012028,10090.ENSMUSP00000021668,10090.ENSMUSP00000025236,10090.ENSMUSP00000025279,10090.ENSMUSP00000025590,10090.ENSMUSP00000029041,10090.ENSMUSP00000029770,10090.ENSMUSP00000030340,10090.ENSMUSP00000030408,10090.ENSMUSP00000031508,10090.ENSMUSP00000032362,10090.ENSMUSP00000032985,10090.ENSMUSP00000034267…	Gm2a,Abcd1,Abcb4,Gltp,Npc2,Stard4,Npc1,Osbp,Fabp4,Abcd3,Scp2,Mfsd2a,Triap1,Slco1c1,Slco2b1,Slc27a1,Apoa4,Apoa1,Tmem30a,Plscr4,Apob,Abca9,Slco1a1,Osbpl11,Abcb1a,Osbpl2,Pltp,Ceacam2,Fabp1,C2cd2l,Fabp3,Ano6,Osbpl1a,Col4a3bp,Slc27a4,Pitpnb,Plscr1,Mttp,Ceacam1,Pitpnm1,Abcc1,Pitpnc1,Abcb11,Abca2,Osbpl8,Plscr3,Slco1a6,Pitpna,Pitpnm2,Osbpl9,Slco1a4,Apoe
GO:0015125	Bile acid transmembrane transporter activity	8	1.92982	bottom	0.0075	afc	10090.ENSMUSP00000032362,10090.ENSMUSP00000032985,10090.ENSMUSP00000037022,10090.ENSMUSP00000064255,10090.ENSMUSP00000096266,10090.ENSMUSP00000099771,10090.ENSMUSP00000107458,10090.ENSMUSP00000130746	Slco1c1,Slco2b1,Slco1a1,Ceacam2,Ceacam1,Abcb11,Slco1a6,Slco1a4
GO:0050840	Extracellular matrix binding	30	1.35312	top	0.0089	ks	10090.ENSMUSP00000001548,10090.ENSMUSP00000003061,10090.ENSMUSP00000005532,10090.ENSMUSP00000015667,10090.ENSMUSP00000017488,10090.ENSMUSP00000018737,10090.ENSMUSP00000020204,10090.ENSMUSP00000021028,10090.ENSMUSP00000027438,10090.ENSMUSP00000028499,10090.ENSMUSP00000028522,10090.ENSMUSP00000031249,10090.ENSMUSP00000033741,10090.ENSMUSP00000034756,10090.ENSMUSP00000035105,10090.ENSMUSP00000044903…	Itga3,Bcam,Nid1,Ctss,Vtn,Sparc,Ntn4,Itgb3,Ncl,Itgav,Itga6,Sparcl1,Bgn,Anxa2,Rpsa,Thbs1,Gpc1,Itga2,Adam9,Lgals1,Itgb1,Itga7,Itga2b,Dcn,Tinagl1,Spock2,Lgals3,Plekha2,Slit2,Dag1

## Sheet: CC
#term ID	term description	genes mapped	enrichment score	direction	false discovery rate	method	matching proteins in your input (IDs)	matching proteins in your input (labels)
GO:0022626	Cytosolic ribosome	77	0.769189	bottom	9.73e-16	ks	10090.ENSMUSP00000000365,10090.ENSMUSP00000000756,10090.ENSMUSP00000003521,10090.ENSMUSP00000004072,10090.ENSMUSP00000004554,10090.ENSMUSP00000006496,10090.ENSMUSP00000008036,10090.ENSMUSP00000008812,10090.ENSMUSP00000008826,10090.ENSMUSP00000017548,10090.ENSMUSP00000020640,10090.ENSMUSP00000023269,10090.ENSMUSP00000025511,10090.ENSMUSP00000026420,10090.ENSMUSP00000029387,10090.ENSMUSP00000029722…	Mcts1,Rpl13,Rps11,Rpl8,Rps5,Rps9,Rplp1,Rps18,Rpl10,Rpl19,Gnb2l1,Rpl24,Rps14,Rps26,Eif2a,Rps3a1,Rpl6,Rpl28,Rps3,Rps4x,Rpl4,Rpsa,Dhx29,Rpl21,Rps27l,Rpl10a,Rps23,Rpl18a,Rps21,Rpl37a,Rps15,Rpl7,Rpl26,Rps7,Rpl17,Rpl15,Rps25,Rpl36,Rps17,Rpl35,Rpl29,Rpl3,Rpl32,Rpl5,Rplp2,Rplp0,Rpl34,Rpl27,Rps2,Rpl7l1,Rpl23,Rpl23a,Rpl11,Rps8,Rps6,Rps27a,Rpl7a,Rpl38,Rpl18,Rps16,Rps19,Rpl30,Rpl36al,Rpl9,Rps28,Rps10,Rpl35a,…
GO:0099240	Intrinsic component of synaptic membrane	50	1.2334	top	4.12e-12	ks	10090.ENSMUSP00000000109,10090.ENSMUSP00000003436,10090.ENSMUSP00000003550,10090.ENSMUSP00000004076,10090.ENSMUSP00000005509,10090.ENSMUSP00000017458,10090.ENSMUSP00000018700,10090.ENSMUSP00000020107,10090.ENSMUSP00000020637,10090.ENSMUSP00000021028,10090.ENSMUSP00000025166,10090.ENSMUSP00000026917,10090.ENSMUSP00000027451,10090.ENSMUSP00000028727,10090.ENSMUSP00000030269,10090.ENSMUSP00000032185…	Cntn1,Abhd17a,Ncstn,Grm3,Stx1a,Mpp2,Dlg4,Atp2b1,Canx,Itgb3,Cdh2,Nrp1,Epha4,Snap25,Slc6a9,Slc6a6,Slc6a11,Slc6a1,Slc2a3,Gpc4,Gpm6a,Clstn1,Cdh10,Slc30a1,Cacna2d1,Adam22,Kcna1,Marcksl1,Ptprs,Itgb5,Flot2,Ptpra,Slc1a2,Cadm1,Fxyd6,Slc8a1,Atp2b2,Itgb1,Psen1,Rtn4,Atp1a3,Stx1b,Cadm3,Atp2b4,Prrt2,Syt7,Slc8a2,Abhd6,Ncam1,Adam23
GO:0098798	Mitochondrial protein complex	169	0.336894	top	2.33e-11	ks	10090.ENSMUSP00000000090,10090.ENSMUSP00000001485,10090.ENSMUSP00000002452,10090.ENSMUSP00000002844,10090.ENSMUSP00000004375,10090.ENSMUSP00000004729,10090.ENSMUSP00000005647,10090.ENSMUSP00000005817,10090.ENSMUSP00000006669,10090.ENSMUSP00000010007,10090.ENSMUSP00000013737,10090.ENSMUSP00000014438,10090.ENSMUSP00000014445,10090.ENSMUSP00000015501,10090.ENSMUSP00000015816,10090.ENSMUSP00000016396…	Cox5a,Mrpl10,Ndufa11,Mrpl2,Phb2,Etfb,Ndufs3,Tomm40l,Pdk1,Sdhb,Ndufs2,Ndufa2,Pam16,Clpx,Mrpl32,Atp5e,Ndufa1,Mrpl45,Supv3l1,Mcu,Timm13,Pnpt1,Mrpl22,Mp68,Uqcrb,Sdha,Ndufs6,Mrps30,Pdhb,Ndufs4,Ppif,Ndufb9,Tomm22,Samm50,Ndufa6,Cyc1,Ndufb4,Atp5j,Atp5o,Ndufa5,Mrps23,Afg3l2,Mrpl21,Mrpl11,Ndufb8,Hsd17b10,Atp5b,Atp5a1,Apool,Uqcrc1,Ndufs1,Ndufb3,Mrpl44,Ndufa10,Timm10,Mtx2,Mrps5,Mccc1,Etfdh,Ccdc109b,Mrpl9,Mrp…
GO:0097060	Synaptic membrane	156	0.734057	top	2.41e-11	ks	10090.ENSMUSP00000000109,10090.ENSMUSP00000000939,10090.ENSMUSP00000001548,10090.ENSMUSP00000002603,10090.ENSMUSP00000003436,10090.ENSMUSP00000003550,10090.ENSMUSP00000003754,10090.ENSMUSP00000004076,10090.ENSMUSP00000004378,10090.ENSMUSP00000005077,10090.ENSMUSP00000005509,10090.ENSMUSP00000006293,10090.ENSMUSP00000007130,10090.ENSMUSP00000013807,10090.ENSMUSP00000015800,10090.ENSMUSP00000017276…	Cntn1,Hip1r,Itga3,Scrib,Abhd17a,Ncstn,Calb2,Grm3,Eno2,Hspb1,Stx1a,Crkl,Ctnnb1,Pten,Hspa8,Cyth1,Mpp2,Kpna2,Dlg4,Lin7a,Atp2b1,Canx,Dbnl,Itgb3,Dbn1,Sept3,Hcls1,Cdh2,Anxa1,Apba1,Baiap2,Farp1,Nrp1,Epha4,Itga8,Lin7c,Snap25,Snta1,Nbea,Slc6a9,Stx2,Slc6a6,Itpr1,Slc6a11,Slc6a1,Slc2a3,Stx4a,Cask,Gpc4,Syap1,Gpm6a,Cbln1,Mtmr2,Cryab,Trappc4,Clstn1,Exoc3,Syne1,Palm,Ppp1r9b,Cdh10,Slc30a1,Fcho2,Syde1,Zdhhc17,Ank2…
GO:0098889	Intrinsic component of presynaptic membrane	33	1.37362	top	2.22e-10	ks	10090.ENSMUSP00000000109,10090.ENSMUSP00000003550,10090.ENSMUSP00000004076,10090.ENSMUSP00000005509,10090.ENSMUSP00000020107,10090.ENSMUSP00000020637,10090.ENSMUSP00000025166,10090.ENSMUSP00000027451,10090.ENSMUSP00000028727,10090.ENSMUSP00000030269,10090.ENSMUSP00000032451,10090.ENSMUSP00000032454,10090.ENSMUSP00000033450,10090.ENSMUSP00000033915,10090.ENSMUSP00000042199,10090.ENSMUSP00000049457…	Cntn1,Ncstn,Grm3,Stx1a,Atp2b1,Canx,Cdh2,Epha4,Snap25,Slc6a9,Slc6a11,Slc6a1,Gpc4,Gpm6a,Cdh10,Cacna2d1,Kcna1,Marcksl1,Ptprs,Flot2,Slc1a2,Cadm1,Fxyd6,Atp2b2,Psen1,Atp1a3,Stx1b,Cadm3,Atp2b4,Prrt2,Syt7,Ncam1,Adam23
GO:0042734	Presynaptic membrane	72	0.898373	top	4.86e-09	ks	10090.ENSMUSP00000000109,10090.ENSMUSP00000002603,10090.ENSMUSP00000003550,10090.ENSMUSP00000004076,10090.ENSMUSP00000005509,10090.ENSMUSP00000007130,10090.ENSMUSP00000017276,10090.ENSMUSP00000020107,10090.ENSMUSP00000020637,10090.ENSMUSP00000023095,10090.ENSMUSP00000025166,10090.ENSMUSP00000025830,10090.ENSMUSP00000027451,10090.ENSMUSP00000028727,10090.ENSMUSP00000030269,10090.ENSMUSP00000031378…	Cntn1,Scrib,Ncstn,Grm3,Stx1a,Ctnnb1,Cyth1,Atp2b1,Canx,Sept3,Cdh2,Apba1,Epha4,Snap25,Slc6a9,Stx2,Slc6a11,Slc6a1,Stx4a,Cask,Gpc4,Syap1,Gpm6a,Exoc3,Cdh10,Fcho2,Zdhhc17,Cacna2d1,Picalm,Kcna1,Marcksl1,Hip1,Ptprs,Dlg1,Pi4k2a,Syp,Flot2,Slc1a2,Nptn,Cadm1,Fxyd6,Fmr1,Atp2b2,Erc2,Dnm1,Stxbp1,Cltb,Snap91,Epn1,Psen1,Cntnap1,Cltc,Atp1a3,L1cam,Syt1,Pip5k1c,Stx1b,Clta,Unc13b,Cadm3,Sept7,Dnm1l,Atp2b4,Phb,Stxbp5,P…
GO:0099699	Integral component of synaptic membrane	41	1.22002	top	8.34e-09	ks	10090.ENSMUSP00000003550,10090.ENSMUSP00000004076,10090.ENSMUSP00000005509,10090.ENSMUSP00000020107,10090.ENSMUSP00000020637,10090.ENSMUSP00000021028,10090.ENSMUSP00000025166,10090.ENSMUSP00000026917,10090.ENSMUSP00000027451,10090.ENSMUSP00000030269,10090.ENSMUSP00000032185,10090.ENSMUSP00000032451,10090.ENSMUSP00000032454,10090.ENSMUSP00000032476,10090.ENSMUSP00000033915,10090.ENSMUSP00000036962…	Ncstn,Grm3,Stx1a,Atp2b1,Canx,Itgb3,Cdh2,Nrp1,Epha4,Slc6a9,Slc6a6,Slc6a11,Slc6a1,Slc2a3,Gpm6a,Clstn1,Cdh10,Slc30a1,Adam22,Kcna1,Ptprs,Itgb5,Ptpra,Slc1a2,Cadm1,Fxyd6,Slc8a1,Atp2b2,Itgb1,Psen1,Rtn4,Atp1a3,Stx1b,Cadm3,Atp2b4,Prrt2,Syt7,Slc8a2,Abhd6,Ncam1,Adam23
GO:0022625	Cytosolic large ribosomal subunit	42	0.823652	bottom	6.45e-08	ks	10090.ENSMUSP00000000756,10090.ENSMUSP00000004072,10090.ENSMUSP00000008036,10090.ENSMUSP00000008826,10090.ENSMUSP00000017548,10090.ENSMUSP00000023269,10090.ENSMUSP00000031617,10090.ENSMUSP00000032597,10090.ENSMUSP00000034966,10090.ENSMUSP00000041652,10090.ENSMUSP00000048469,10090.ENSMUSP00000058368,10090.ENSMUSP00000058919,10090.ENSMUSP00000071616,10090.ENSMUSP00000073175,10090.ENSMUSP00000078654…	Rpl13,Rpl8,Rplp1,Rpl10,Rpl19,Rpl24,Rpl6,Rpl28,Rpl4,Rpl21,Rpl10a,Rpl18a,Rpl37a,Rpl7,Rpl26,Rpl17,Rpl15,Rpl36,Rpl35,Rpl29,Rpl3,Rpl32,Rpl5,Rplp2,Rplp0,Rpl34,Rpl27,Rpl7l1,Rpl23,Rpl23a,Rpl11,Rpl7a,Rpl38,Rpl18,Rpl30,Rpl36al,Rpl9,Rpl35a,Rpl13a,Rpl22,Rpl14,Rpl31
GO:0099056	Integral component of presynaptic membrane	27	1.34778	top	6.45e-08	ks	10090.ENSMUSP00000003550,10090.ENSMUSP00000004076,10090.ENSMUSP00000005509,10090.ENSMUSP00000020107,10090.ENSMUSP00000020637,10090.ENSMUSP00000025166,10090.ENSMUSP00000027451,10090.ENSMUSP00000030269,10090.ENSMUSP00000032451,10090.ENSMUSP00000032454,10090.ENSMUSP00000033915,10090.ENSMUSP00000042199,10090.ENSMUSP00000055225,10090.ENSMUSP00000064048,10090.ENSMUSP00000079100,10090.ENSMUSP00000083073…	Ncstn,Grm3,Stx1a,Atp2b1,Canx,Cdh2,Epha4,Slc6a9,Slc6a11,Slc6a1,Gpm6a,Cdh10,Kcna1,Ptprs,Slc1a2,Cadm1,Fxyd6,Atp2b2,Psen1,Atp1a3,Stx1b,Cadm3,Atp2b4,Prrt2,Syt7,Ncam1,Adam23
GO:0098800	Inner mitochondrial membrane protein complex	92	0.376315	top	1.3e-07	ks	10090.ENSMUSP00000000090,10090.ENSMUSP00000002452,10090.ENSMUSP00000004375,10090.ENSMUSP00000005647,10090.ENSMUSP00000010007,10090.ENSMUSP00000013737,10090.ENSMUSP00000014438,10090.ENSMUSP00000014445,10090.ENSMUSP00000016396,10090.ENSMUSP00000016571,10090.ENSMUSP00000020312,10090.ENSMUSP00000021719,10090.ENSMUSP00000021993,10090.ENSMUSP00000022062,10090.ENSMUSP00000022097,10090.ENSMUSP00000022286…	Cox5a,Ndufa11,Phb2,Ndufs3,Sdhb,Ndufs2,Ndufa2,Pam16,Atp5e,Ndufa1,Mcu,Mp68,Uqcrb,Sdha,Ndufs6,Ndufs4,Ndufb9,Ndufa6,Cyc1,Ndufb4,Atp5j,Atp5o,Ndufa5,Afg3l2,Ndufb8,Atp5b,Atp5a1,Apool,Uqcrc1,Ndufs1,Ndufb3,Ndufa10,Ccdc109b,Ndufs5,Grpel1,Ndufa4,Agk,Chchd6,Ndufc2,Ndufab1,Uqcrc2,Timm17b,Cox4i1,Ndufb7,Ndufa7,Ndufa4l2,Ndufv1,Ndufb10,Uqcrfs1,Cox6a1,Ndufv3,Atp5k,Dnajc11,Mic13,Uqcrq,Uqcr10,Timm29,Ndufa8,Immt,Chch…
GO:0022627	Cytosolic small ribosomal subunit	34	0.79291	bottom	1.45e-07	ks	10090.ENSMUSP00000000365,10090.ENSMUSP00000003521,10090.ENSMUSP00000004554,10090.ENSMUSP00000006496,10090.ENSMUSP00000008812,10090.ENSMUSP00000020640,10090.ENSMUSP00000025511,10090.ENSMUSP00000026420,10090.ENSMUSP00000029387,10090.ENSMUSP00000029722,10090.ENSMUSP00000032998,10090.ENSMUSP00000033683,10090.ENSMUSP00000035105,10090.ENSMUSP00000035244,10090.ENSMUSP00000046016,10090.ENSMUSP00000054490…	Mcts1,Rps11,Rps5,Rps9,Rps18,Gnb2l1,Rps14,Rps26,Eif2a,Rps3a1,Rps3,Rps4x,Rpsa,Dhx29,Rps27l,Rps23,Rps21,Rps15,Rps7,Rps25,Rps17,Rps2,Rps8,Rps6,Rps27a,Rps16,Rps19,Rps28,Rps10,Rps15a,Rps20,Rps24,Rps13,Fau
GO:0043209	Myelin sheath	180	0.37577	top	8.03e-07	ks	10090.ENSMUSP00000000090,10090.ENSMUSP00000000109,10090.ENSMUSP00000000317,10090.ENSMUSP00000000590,10090.ENSMUSP00000001304,10090.ENSMUSP00000001452,10090.ENSMUSP00000002603,10090.ENSMUSP00000004140,10090.ENSMUSP00000004378,10090.ENSMUSP00000005234,10090.ENSMUSP00000005256,10090.ENSMUSP00000005292,10090.ENSMUSP00000005647,10090.ENSMUSP00000006181,10090.ENSMUSP00000006435,10090.ENSMUSP00000007012…	Cox5a,Cntn1,Ckmt1,Rdx,Ckb,Cct3,Scrib,Gstm1,Eno2,Wdr1,Ndrg1,Prdx2,Ndufs3,Napa,Atp6v1b2,Sod2,Rala,Syn2,Pgam1,Pten,Gdi1,Hspa8,Slc25a5,Sept4,Mdh2,Canx,Nme2,Tppp,Sdha,Vdac2,Tkt,Dpysl2,Nefm,Nefl,Cct5,Aco2,Atp5o,Sod1,Ehd3,Hspa9,Napg,Ehd1,Stip1,Prdx3,Atp5b,Atp5a1,Uqcrc1,Ndufs1,Hspd1,Ndufa10,Sept2,Atp1b1,Gsn,Pdia3,Snap25,Napb,Car2,Tspan2,Vcp,Fam213b,Gnb1,Uchl1,Alb,Fscn1,Gnb2,Ldhb,Stx4a,Uqcrc2,Pdha1,Plp1,S…
GO:0062023	Collagen-containing extracellular matrix	130	1.12615	top	1.34e-06	ks	10090.ENSMUSP00000000769,10090.ENSMUSP00000001147,10090.ENSMUSP00000001181,10090.ENSMUSP00000001544,10090.ENSMUSP00000001547,10090.ENSMUSP00000002678,10090.ENSMUSP00000002979,10090.ENSMUSP00000003912,10090.ENSMUSP00000004968,10090.ENSMUSP00000005185,10090.ENSMUSP00000005532,10090.ENSMUSP00000006235,10090.ENSMUSP00000006367,10090.ENSMUSP00000014578,10090.ENSMUSP00000015791,10090.ENSMUSP00000016400…	Serpinf1,Col6a1,Col6a2,Vwa5a,Col1a1,Tgfb1,Lamb1,Calr,Plod3,Cstb,Nid1,Ctsb,Htra1,Plg,Lama5,Ctsz,Serpinb6a,Vtn,Sparc,Plod1,Lama4,Ntn4,Timp3,Ctsl,Hapln1,Ngly1,Nid2,Anxa11,Ahsg,Kng1,Krt1,Anxa1,Mbl2,Smc3,Itih5,Serpine2,Lamc1,Plxna2,Plxdc2,Lamc3,Itga6,Fbn1,F2,Cst3,Anxa5,S100a11,Col24a1,Sparcl1,Alb,Pf4,Anxa3,Col1a2,Pzp,Ctsc,Mfge8,Cask,Gpc4,Bgn,Hcfc1,Col4a1,Col4a2,Cfdp1,Anxa2,Pkm,Rpsa,Trf,S100a10,Fgg,Ltb…
GO:0098936	Intrinsic component of postsynaptic membrane	29	1.07276	top	1.56e-06	ks	10090.ENSMUSP00000000109,10090.ENSMUSP00000003436,10090.ENSMUSP00000004076,10090.ENSMUSP00000017458,10090.ENSMUSP00000018700,10090.ENSMUSP00000020637,10090.ENSMUSP00000025166,10090.ENSMUSP00000026917,10090.ENSMUSP00000027451,10090.ENSMUSP00000030269,10090.ENSMUSP00000032185,10090.ENSMUSP00000032451,10090.ENSMUSP00000032454,10090.ENSMUSP00000036962,10090.ENSMUSP00000042199,10090.ENSMUSP00000042410…	Cntn1,Abhd17a,Grm3,Mpp2,Dlg4,Canx,Cdh2,Nrp1,Epha4,Slc6a9,Slc6a6,Slc6a11,Slc6a1,Clstn1,Cdh10,Slc30a1,Cacna2d1,Adam22,Kcna1,Ptprs,Cadm1,Fxyd6,Slc8a1,Atp2b2,Itgb1,Rtn4,Slc8a2,Abhd6,Ncam1
GO:0005577	Fibrinogen complex	5	6.27195	top	1.91e-06	afc	10090.ENSMUSP00000037018,10090.ENSMUSP00000039472,10090.ENSMUSP00000044903,10090.ENSMUSP00000054499,10090.ENSMUSP00000133117	Fgg,Fgb,Thbs1,Fn1,Fga
GO:0031091	Platelet alpha granule	12	3.99682	top	1.91e-06	afc	10090.ENSMUSP00000018737,10090.ENSMUSP00000024792,10090.ENSMUSP00000027467,10090.ENSMUSP00000031320,10090.ENSMUSP00000032749,10090.ENSMUSP00000037018,10090.ENSMUSP00000039472,10090.ENSMUSP00000044903,10090.ENSMUSP00000052262,10090.ENSMUSP00000089051,10090.ENSMUSP00000099681,10090.ENSMUSP00000133117	Sparc,Treml1,Serpine2,Pf4,Vps33b,Fgg,Fgb,Thbs1,Vamp7,Stxbp1,Stxbp3a,Fga
GO:0043083	Synaptic cleft	12	3.10038	top	1.91e-06	afc	10090.ENSMUSP00000015791,10090.ENSMUSP00000019992,10090.ENSMUSP00000025875,10090.ENSMUSP00000027752,10090.ENSMUSP00000031249,10090.ENSMUSP00000034076,10090.ENSMUSP00000064538,10090.ENSMUSP00000069087,10090.ENSMUSP00000084507,10090.ENSMUSP00000090304,10090.ENSMUSP00000133302,10090.ENSMUSP00000137931	Lama5,Lama4,Slc1a1,Lamc1,Sparcl1,Cbln1,Dnm3,Lamb2,Lgi1,Lama2,Apoe,Agrn
GO:0044391	Ribosomal subunit	118	0.44529	bottom	1.91e-06	ks	10090.ENSMUSP00000000365,10090.ENSMUSP00000000756,10090.ENSMUSP00000001485,10090.ENSMUSP00000002844,10090.ENSMUSP00000003521,10090.ENSMUSP00000004072,10090.ENSMUSP00000004554,10090.ENSMUSP00000006496,10090.ENSMUSP00000008036,10090.ENSMUSP00000008812,10090.ENSMUSP00000008826,10090.ENSMUSP00000015816,10090.ENSMUSP00000017548,10090.ENSMUSP00000019026,10090.ENSMUSP00000020640,10090.ENSMUSP00000020820…	Mcts1,Rpl13,Mrpl10,Mrpl2,Rps11,Rpl8,Rps5,Rps9,Rplp1,Rps18,Rpl10,Mrpl32,Rpl19,Mrpl45,Gnb2l1,Mrpl22,Mrps30,Rpl24,Mrps23,Rps14,Mrpl21,Mrpl11,Rps26,Mrpl44,Mrps5,Eif2a,Rps3a1,Mrpl9,Mrpl37,Mrps15,Mrpl33,Rpl6,Mrps33,Rpl28,Mrps11,Mrpl46,Rps3,Ndufab1,Rps4x,Mrps31,Rpl4,Mrps22,Rpsa,Mrpl3,Dhx29,Mrps2,Mrps6,Rpl21,Mrpl41,Mrpl12,Mrps34,Rps27l,Mrps35,Rpl10a,Rps23,Mrps9,Rpl18a,Rps21,Rpl37a,Mrps27,Mrps21,Rps15,Rpl…
GO:0072562	Blood microparticle	6	4.82218	top	1.91e-06	afc	10090.ENSMUSP00000002678,10090.ENSMUSP00000009705,10090.ENSMUSP00000029266,10090.ENSMUSP00000037018,10090.ENSMUSP00000039472,10090.ENSMUSP00000133117	Tgfb1,Eng,Anxa5,Fgg,Fgb,Fga
GO:0070469	Respirasome	62	0.488014	top	1.93e-06	ks	10090.ENSMUSP00000000090,10090.ENSMUSP00000002452,10090.ENSMUSP00000005647,10090.ENSMUSP00000010007,10090.ENSMUSP00000013737,10090.ENSMUSP00000014438,10090.ENSMUSP00000016571,10090.ENSMUSP00000020372,10090.ENSMUSP00000021993,10090.ENSMUSP00000022062,10090.ENSMUSP00000022097,10090.ENSMUSP00000022286,10090.ENSMUSP00000022980,10090.ENSMUSP00000023085,10090.ENSMUSP00000023210,10090.ENSMUSP00000023514…	Cox5a,Ndufa11,Ndufs3,Sdhb,Ndufs2,Ndufa2,Ndufa1,Uqcr11,Uqcrb,Sdha,Ndufs6,Ndufs4,Ndufb9,Ndufa6,Cyc1,Ndufb4,Ndufa5,Ndufb8,Uqcrc1,Ndufs1,Ndufb3,Ndufa10,Ndufs5,Ndufa4,Ndufc2,Ndufab1,Uqcrc2,Cox4i1,Cox7a2,Ndufb7,Ndufa7,Ndufa4l2,Ndufv1,Ndufb10,Uqcrfs1,Cox6a1,Ndufv3,Uqcrq,Uqcr10,Ndufa8,Ndufs8,Cox6b1,Ndufa3,Uqcrh,mt-Nd1,mt-Nd2,mt-Co1,mt-Co2,mt-Nd4,mt-Nd5,Ndufa9,Ndufb6,Ndufs7,Cox4i2,Ndufa13,Sdhc,Ndufb11,Ndu…
GO:0098803	Respiratory chain complex	59	0.491312	top	3.03e-06	ks	10090.ENSMUSP00000000090,10090.ENSMUSP00000002452,10090.ENSMUSP00000005647,10090.ENSMUSP00000010007,10090.ENSMUSP00000013737,10090.ENSMUSP00000014438,10090.ENSMUSP00000016571,10090.ENSMUSP00000021993,10090.ENSMUSP00000022062,10090.ENSMUSP00000022097,10090.ENSMUSP00000022286,10090.ENSMUSP00000022980,10090.ENSMUSP00000023085,10090.ENSMUSP00000023210,10090.ENSMUSP00000023514,10090.ENSMUSP00000023851…	Cox5a,Ndufa11,Ndufs3,Sdhb,Ndufs2,Ndufa2,Ndufa1,Uqcrb,Sdha,Ndufs6,Ndufs4,Ndufb9,Ndufa6,Cyc1,Ndufb4,Ndufa5,Ndufb8,Uqcrc1,Ndufs1,Ndufb3,Ndufa10,Ndufs5,Ndufa4,Ndufc2,Ndufab1,Uqcrc2,Cox4i1,Ndufb7,Ndufa7,Ndufa4l2,Ndufv1,Ndufb10,Uqcrfs1,Cox6a1,Ndufv3,Uqcrq,Uqcr10,Ndufa8,Ndufs8,Cox6b1,Ndufa3,Uqcrh,mt-Nd1,mt-Nd2,mt-Co1,mt-Co2,mt-Nd4,mt-Nd5,Ndufa9,Ndufb6,Ndufs7,Cox4i2,Ndufa13,Sdhc,Ndufb11,Ndufb5,Cox7c,Nduf…
GO:0031012	Extracellular matrix	138	1.06306	top	7.13e-06	ks	10090.ENSMUSP00000000769,10090.ENSMUSP00000001147,10090.ENSMUSP00000001181,10090.ENSMUSP00000001544,10090.ENSMUSP00000001547,10090.ENSMUSP00000002678,10090.ENSMUSP00000002979,10090.ENSMUSP00000003912,10090.ENSMUSP00000004968,10090.ENSMUSP00000005185,10090.ENSMUSP00000005532,10090.ENSMUSP00000006235,10090.ENSMUSP00000006367,10090.ENSMUSP00000014578,10090.ENSMUSP00000015791,10090.ENSMUSP00000016400…	Serpinf1,Col6a1,Col6a2,Vwa5a,Col1a1,Tgfb1,Lamb1,Calr,Plod3,Cstb,Nid1,Ctsb,Htra1,Plg,Lama5,Ctsz,Serpinb6a,Vtn,Sparc,Plod1,Lama4,Ntn4,Timp3,Gpld1,Ctsl,Hapln1,Ngly1,Nid2,Anxa11,Ahsg,Kng1,Krt1,Anxa1,Mbl2,Smc3,Itih5,Serpine2,Lamc1,Plxna2,Plxdc2,Lamc3,Itga6,Hsd17b12,Fbn1,F2,Cst3,Anxa5,S100a11,Col24a1,Alpl,Sparcl1,Tfip11,Alb,Pf4,Anxa3,Col1a2,Pzp,Ctsc,Mfge8,Cask,Gpc4,Bgn,Hcfc1,Col4a1,Col4a2,Cfdp1,Anxa2,P…
GO:0070382	Exocytic vesicle	134	0.546144	top	7.15e-06	ks	10090.ENSMUSP00000000619,10090.ENSMUSP00000000727,10090.ENSMUSP00000003038,10090.ENSMUSP00000003121,10090.ENSMUSP00000003345,10090.ENSMUSP00000003550,10090.ENSMUSP00000005067,10090.ENSMUSP00000005406,10090.ENSMUSP00000005509,10090.ENSMUSP00000007236,10090.ENSMUSP00000007803,10090.ENSMUSP00000009538,10090.ENSMUSP00000010038,10090.ENSMUSP00000013304,10090.ENSMUSP00000015800,10090.ENSMUSP00000015891…	Clcn4-2,Rab5b,Ap2a2,Rab8a,Amph,Ncstn,Sgta,App,Stx1a,Syngr3,Bcl2l1,Syn2,Snap47,Atp6v0d1,Hspa8,Vps45,Rab5a,Sept4,Dlg4,Rab5c,Gipc1,Stx7,Rab10,Vamp2,Scamp1,Vdac2,Atp6v0c,Bin1,Apba1,Syngr2,Cops5,Slc40a1,Stx6,Tor1a,Rab14,Snap25,Anxa5,Sec22b,Sh3gl2,Slc6a9,Ppt1,Stx12,Vamp3,Stx2,Rab35,Slc2a3,Vamp1,Vps33b,Rab6a,Stx4a,Sytl4,Lamp1,Mt3,Mtmr2,Trappc4,Rab27a,Syt15,Sv2a,Rab8b,Atp8a1,Atp6v0a1,Lgi3,Wfs1,Cops4,Pebp…
GO:0005746	Mitochondrial respirasome	59	0.490821	top	8.28e-06	ks	10090.ENSMUSP00000000090,10090.ENSMUSP00000002452,10090.ENSMUSP00000005647,10090.ENSMUSP00000010007,10090.ENSMUSP00000013737,10090.ENSMUSP00000014438,10090.ENSMUSP00000016571,10090.ENSMUSP00000021993,10090.ENSMUSP00000022062,10090.ENSMUSP00000022097,10090.ENSMUSP00000022286,10090.ENSMUSP00000022980,10090.ENSMUSP00000023085,10090.ENSMUSP00000023210,10090.ENSMUSP00000023514,10090.ENSMUSP00000023851…	Cox5a,Ndufa11,Ndufs3,Sdhb,Ndufs2,Ndufa2,Ndufa1,Uqcrb,Sdha,Ndufs6,Ndufs4,Ndufb9,Ndufa6,Cyc1,Ndufb4,Ndufa5,Ndufb8,Uqcrc1,Ndufs1,Ndufb3,Ndufa10,Ndufs5,Ndufa4,Ndufc2,Ndufab1,Uqcrc2,Cox4i1,Cox7a2,Ndufb7,Ndufa7,Ndufa4l2,Ndufv1,Ndufb10,Uqcrfs1,Cox6a1,Ndufv3,Uqcrq,Uqcr10,Ndufa8,Ndufs8,Ndufa3,Uqcrh,mt-Nd1,mt-Nd2,mt-Co1,mt-Nd4,mt-Nd5,Ndufa9,Ndufb6,Ndufs7,Cox4i2,Ndufa13,Sdhc,Ndufb11,Ndufb5,Cox7c,Ndufv2,Cox7…
GO:0045211	Postsynaptic membrane	87	0.682942	top	1.07e-05	ks	10090.ENSMUSP00000000109,10090.ENSMUSP00000002603,10090.ENSMUSP00000003436,10090.ENSMUSP00000004076,10090.ENSMUSP00000005077,10090.ENSMUSP00000006293,10090.ENSMUSP00000007130,10090.ENSMUSP00000013807,10090.ENSMUSP00000015800,10090.ENSMUSP00000017458,10090.ENSMUSP00000018506,10090.ENSMUSP00000018700,10090.ENSMUSP00000020057,10090.ENSMUSP00000020637,10090.ENSMUSP00000020769,10090.ENSMUSP00000021028…	Cntn1,Scrib,Abhd17a,Grm3,Hspb1,Crkl,Ctnnb1,Pten,Hspa8,Mpp2,Kpna2,Dlg4,Lin7a,Canx,Dbnl,Itgb3,Dbn1,Hcls1,Cdh2,Farp1,Nrp1,Epha4,Lin7c,Snta1,Nbea,Slc6a9,Slc6a6,Slc6a11,Slc6a1,Syap1,Cbln1,Trappc4,Clstn1,Syne1,Cdh10,Slc30a1,Ank2,Pacsin1,Akap9,Cacna2d1,Picalm,Dnaja3,Erbb2,Adam22,Usp48,Kcna1,Sigmar1,Hip1,Adam10,Ptprs,Dlg1,Dnm3,Atad1,Nrgn,Dtnbp1,Rph3a,Cadm1,Fxyd6,Slc8a1,Fmr1,Atp2b2,Itgb1,Dnm1,Srgap2,Arrb1…
GO:0043256	Laminin complex	7	3.83259	top	1.12e-05	afc	10090.ENSMUSP00000002979,10090.ENSMUSP00000015791,10090.ENSMUSP00000020204,10090.ENSMUSP00000027752,10090.ENSMUSP00000043957,10090.ENSMUSP00000069087,10090.ENSMUSP00000089703	Lamb1,Lama5,Ntn4,Lamc1,Lama1,Lamb2,Lama3
GO:0008021	Synaptic vesicle	130	0.529084	top	1.46e-05	ks	10090.ENSMUSP00000000619,10090.ENSMUSP00000000727,10090.ENSMUSP00000003038,10090.ENSMUSP00000003121,10090.ENSMUSP00000003345,10090.ENSMUSP00000003550,10090.ENSMUSP00000005067,10090.ENSMUSP00000005406,10090.ENSMUSP00000005509,10090.ENSMUSP00000007236,10090.ENSMUSP00000007803,10090.ENSMUSP00000009538,10090.ENSMUSP00000010038,10090.ENSMUSP00000013304,10090.ENSMUSP00000015800,10090.ENSMUSP00000015891…	Clcn4-2,Rab5b,Ap2a2,Rab8a,Amph,Ncstn,Sgta,App,Stx1a,Syngr3,Bcl2l1,Syn2,Snap47,Atp6v0d1,Hspa8,Vps45,Rab5a,Sept4,Dlg4,Rab5c,Gipc1,Stx7,Rab10,Vamp2,Scamp1,Vdac2,Atp6v0c,Bin1,Apba1,Syngr2,Cops5,Slc40a1,Stx6,Tor1a,Rab14,Snap25,Anxa5,Sec22b,Sh3gl2,Slc6a9,Ppt1,Stx12,Vamp3,Stx2,Rab35,Slc2a3,Vamp1,Vps33b,Stx4a,Lamp1,Mt3,Mtmr2,Trappc4,Sv2a,Rab8b,Atp8a1,Atp6v0a1,Lgi3,Wfs1,Cops4,Pebp1,Picalm,Vamp4,Exoc4,Vamp…
GO:1990204	Oxidoreductase complex	78	0.390625	top	2.32e-05	ks	10090.ENSMUSP00000000260,10090.ENSMUSP00000002397,10090.ENSMUSP00000002452,10090.ENSMUSP00000003461,10090.ENSMUSP00000004729,10090.ENSMUSP00000005647,10090.ENSMUSP00000006669,10090.ENSMUSP00000009789,10090.ENSMUSP00000010007,10090.ENSMUSP00000011058,10090.ENSMUSP00000013737,10090.ENSMUSP00000014438,10090.ENSMUSP00000015484,10090.ENSMUSP00000016571,10090.ENSMUSP00000019050,10090.ENSMUSP00000021993…	Gmpr,Gmpr2,Ndufa11,Ogdh,Etfb,Ndufs3,Pdk1,P4ha1,Sdhb,Pdhx,Ndufs2,Ndufa2,Cybb,Ndufa1,P4ha2,Uqcrb,Sdha,Ndufs6,Pdhb,Ndufs4,Ndufb9,Ndufa6,Cyc1,Ndufb4,Gpd1,Ndufa5,P4hb,Ndufb8,Uqcrc1,Ndufs1,Ndufb3,Ndufa10,Etfdh,Ndufs5,Ndufa4,Ndufc2,Ndufab1,Uqcrc2,Rrm1,Pdha1,Cbr4,Dlat,Etfa,Ndufb7,Ndufa7,Pdk2,Ndufv1,Ndufb10,Uqcrfs1,Ndufv3,Uqcrq,Uqcr10,Dlst,Ndufa8,Bckdk,Bckdha,Ndufs8,Ndufa3,Uqcrh,mt-Nd1,mt-Nd2,mt-Co1,mt-Nd…
GO:0005747	Mitochondrial respiratory chain complex i	39	0.47102	top	5.76e-05	ks	10090.ENSMUSP00000002452,10090.ENSMUSP00000005647,10090.ENSMUSP00000013737,10090.ENSMUSP00000014438,10090.ENSMUSP00000016571,10090.ENSMUSP00000022097,10090.ENSMUSP00000022286,10090.ENSMUSP00000022980,10090.ENSMUSP00000023085,10090.ENSMUSP00000023514,10090.ENSMUSP00000023851,10090.ENSMUSP00000026222,10090.ENSMUSP00000027111,10090.ENSMUSP00000027193,10090.ENSMUSP00000027478,10090.ENSMUSP00000030401…	Ndufa11,Ndufs3,Ndufs2,Ndufa2,Ndufa1,Ndufs6,Ndufs4,Ndufb9,Ndufa6,Ndufb4,Ndufa5,Ndufb8,Ndufs1,Ndufb3,Ndufa10,Ndufs5,Ndufa4,Ndufc2,Ndufab1,Ndufb7,Ndufa7,Ndufv1,Ndufb10,Ndufv3,Ndufa8,Ndufs8,Ndufa3,mt-Nd1,mt-Nd2,mt-Nd4,mt-Nd5,Ndufa9,Ndufb6,Ndufs7,Ndufa13,Ndufb11,Ndufb5,Ndufv2,Ndufa12
GO:0005840	Ribosome	136	0.326378	bottom	5.76e-05	ks	10090.ENSMUSP00000000365,10090.ENSMUSP00000000756,10090.ENSMUSP00000001485,10090.ENSMUSP00000002844,10090.ENSMUSP00000003521,10090.ENSMUSP00000004072,10090.ENSMUSP00000004554,10090.ENSMUSP00000006496,10090.ENSMUSP00000008036,10090.ENSMUSP00000008812,10090.ENSMUSP00000008826,10090.ENSMUSP00000015816,10090.ENSMUSP00000017548,10090.ENSMUSP00000019026,10090.ENSMUSP00000020637,10090.ENSMUSP00000020640…	Mcts1,Rpl13,Mrpl10,Mrpl2,Rps11,Rpl8,Rps5,Rps9,Rplp1,Rps18,Rpl10,Mrpl32,Rpl19,Mrpl45,Canx,Gnb2l1,Pnpt1,Mrpl22,Btf3,Mrps30,Eif3h,Rpl24,Mrps23,Rps14,Mrpl21,Mrpl11,Rps26,Mrpl44,Hspa14,Mrps5,Eif2a,Rps3a1,Mrpl9,Mrpl37,Mrps15,Mrpl33,Rpl6,Mrps33,Rpl28,Mrps11,Mrpl46,Rps3,Ndufab1,Rps4x,Mrps31,Mt3,Rpl4,Mrps22,Rpsa,Mrpl3,Dhx29,Mrps2,Abcf1,Mrps6,Gadd45gip1,Dhx9,Ndufa7,Rpl21,Mrpl41,Mrpl12,Mrps34,Rps27l,Eef2,Mr…
GO:0005844	Polysome	60	0.551811	bottom	7.85e-05	ks	10090.ENSMUSP00000001620,10090.ENSMUSP00000003912,10090.ENSMUSP00000004072,10090.ENSMUSP00000017548,10090.ENSMUSP00000018909,10090.ENSMUSP00000019917,10090.ENSMUSP00000020741,10090.ENSMUSP00000020756,10090.ENSMUSP00000021116,10090.ENSMUSP00000021412,10090.ENSMUSP00000022038,10090.ENSMUSP00000022163,10090.ENSMUSP00000022925,10090.ENSMUSP00000023269,10090.ENSMUSP00000025290,10090.ENSMUSP00000026420…	Fxr1,Calr,Rpl8,Rpl19,Fxr2,Rwdd1,Drg1,Pnpt1,Unk,Psma6,Naa35,Btf3,Eif3h,Rpl24,Impact,Rps26,Hspa14,Vim,Rpl6,Rps3,Vbp1,Rps4x,Abcf1,Dhx9,Naa30,Ago2,Mcrs1,Eef2,Eif4g1,Rpl10a,Eif4h,Rps23,Atxn2,Rpl18a,Upf2,Rps21,Gcn1l1,Rpl7,Rpl17,Rps25,Rpl29,Rpl32,Fmr1,Ago1,Nufip2,Rpl11,Myh10,Rps6,Rpl7a,Fus,Rpl38,Rpl18,Msi2,Rpl30,Rps28,Msi1,Eif4b,Hdlbp,Larp1,Rpl31
GO:0099055	Integral component of postsynaptic membrane	24	1.06337	top	0.00011	ks	10090.ENSMUSP00000004076,10090.ENSMUSP00000020637,10090.ENSMUSP00000025166,10090.ENSMUSP00000026917,10090.ENSMUSP00000027451,10090.ENSMUSP00000030269,10090.ENSMUSP00000032185,10090.ENSMUSP00000032451,10090.ENSMUSP00000032454,10090.ENSMUSP00000036962,10090.ENSMUSP00000042199,10090.ENSMUSP00000042410,10090.ENSMUSP00000055000,10090.ENSMUSP00000055225,10090.ENSMUSP00000064048,10090.ENSMUSP00000083073…	Grm3,Canx,Cdh2,Nrp1,Epha4,Slc6a9,Slc6a6,Slc6a11,Slc6a1,Clstn1,Cdh10,Slc30a1,Adam22,Kcna1,Ptprs,Cadm1,Fxyd6,Slc8a1,Atp2b2,Itgb1,Rtn4,Slc8a2,Abhd6,Ncam1
GO:0005604	Basement membrane	41	1.79376	top	0.00018	ks	10090.ENSMUSP00000000769,10090.ENSMUSP00000002979,10090.ENSMUSP00000005532,10090.ENSMUSP00000015791,10090.ENSMUSP00000017488,10090.ENSMUSP00000018737,10090.ENSMUSP00000019992,10090.ENSMUSP00000020204,10090.ENSMUSP00000020234,10090.ENSMUSP00000022340,10090.ENSMUSP00000025930,10090.ENSMUSP00000027752,10090.ENSMUSP00000028187,10090.ENSMUSP00000028522,10090.ENSMUSP00000028633,10090.ENSMUSP00000028938…	Serpinf1,Lamb1,Nid1,Lama5,Vtn,Sparc,Lama4,Ntn4,Timp3,Nid2,Smc3,Lamc1,Lamc3,Itga6,Fbn1,Cst3,Alb,Cask,Col4a1,Col4a2,Cfdp1,Anxa2,Rpsa,Trf,Vwa1,Lama1,Fn1,Dlg1,Lamb2,Itgb1,Lama3,Lama2,Ptn,Lepre1,Cd151,Itgb4,Mmrn2,Entpd1,Col4a3,Dag1,Agrn
GO:0032993	protein-DNA complex	61	0.460133	bottom	0.00022	ks	10090.ENSMUSP00000000767,10090.ENSMUSP00000001326,10090.ENSMUSP00000001592,10090.ENSMUSP00000005830,10090.ENSMUSP00000007130,10090.ENSMUSP00000012627,10090.ENSMUSP00000016081,10090.ENSMUSP00000020283,10090.ENSMUSP00000021405,10090.ENSMUSP00000023525,10090.ENSMUSP00000024727,10090.ENSMUSP00000025241,10090.ENSMUSP00000027777,10090.ENSMUSP00000029611,10090.ENSMUSP00000029938,10090.ENSMUSP00000038181…	Rpa1,Sp1,Jup,Bcas2,Ctnnb1,Rpa3,H2afy,H2afy2,Polr2h,Gtf2e1,Cdc5l,Ercc3,Parp1,Lef1,Gtf2b,Kat6a,Hnrnpk,Rbpj,Obfc1,Wdr18,Nfya,Hist1h1d,Hist1h1c,Smarcal1,H2afx,Terf2ip,Hist1h1e,Pura,Chd4,Hist1h1a,Sos1,Xrcc6,Hmga2,Hist1h2af,Hist1h2ak,Npm1,Hist1h1b,Hist1h4j,Gtf2f2,Hist2h2ac,Kdm5a,Pold2,Hp1bp3,Med1,Hist3h2a,Top1,H2afv,Max,Glyr1,Ctc1,Mphosph8,Nfyc,Plrg1,Terf2,Cenpa,Tbp,Prpf19,Purb,H1f0,Kat6b,Sos2
GO:0043679	Axon terminus	73	0.578302	top	0.00029	ks	10090.ENSMUSP00000000199,10090.ENSMUSP00000003345,10090.ENSMUSP00000003754,10090.ENSMUSP00000004774,10090.ENSMUSP00000006467,10090.ENSMUSP00000013304,10090.ENSMUSP00000013773,10090.ENSMUSP00000015800,10090.ENSMUSP00000017975,10090.ENSMUSP00000020420,10090.ENSMUSP00000020608,10090.ENSMUSP00000022629,10090.ENSMUSP00000023826,10090.ENSMUSP00000025239,10090.ENSMUSP00000025875,10090.ENSMUSP00000026196…	Ncs1,Amph,Calb2,Aqp1,Arpc2,Atp6v0d1,Cad,Hspa8,Rab5a,Ap3d1,Ppp2ca,Dpysl2,Sncg,Bin1,Slc1a1,Got1,Cplx2,Epha4,Anxa5,Calb1,P2rx4,Cyfip1,Rnf40,Rgs10,Ilk,Ophn1,Tanc1,Fkbp1a,Git1,Cplx1,Hnrnpk,Sncb,Blvrb,Pacsin1,Pebp1,Lrrk2,Itga2,Kcna1,Prkca,Pfn2,Syp,Prkcb,Rpl26,Glul,Slc8a1,Fmr1,Aak1,Erc2,Sept5,Snap91,Mical1,Prkcg,Actb,Nos1,Rapgef4,Slc4a10,Atp1a3,L1cam,Unc13b,Rab3a,Git2,Itsn1,Snca,Sept6,Sept7,Synj1,Rapgef…
GO:0005581	Collagen trimer	20	1.56144	top	0.00032	afc	10090.ENSMUSP00000001147,10090.ENSMUSP00000001181,10090.ENSMUSP00000001547,10090.ENSMUSP00000023593,10090.ENSMUSP00000025264,10090.ENSMUSP00000025797,10090.ENSMUSP00000029848,10090.ENSMUSP00000031668,10090.ENSMUSP00000033898,10090.ENSMUSP00000033899,10090.ENSMUSP00000040877,10090.ENSMUSP00000043220,10090.ENSMUSP00000070018,10090.ENSMUSP00000071662,10090.ENSMUSP00000083620,10090.ENSMUSP00000085192…	Col6a1,Col6a2,Col1a1,Adipoq,Wdr33,Mbl2,Col24a1,Col1a2,Col4a1,Col4a2,Lum,Colec12,Cthrc1,Col12a1,Col5a2,Col3a1,Col11a1,Col6a6,Dcn,Col4a3
GO:0150034	Distal axon	175	0.384728	top	0.00032	ks	10090.ENSMUSP00000000199,10090.ENSMUSP00000001548,10090.ENSMUSP00000001620,10090.ENSMUSP00000003345,10090.ENSMUSP00000003754,10090.ENSMUSP00000004378,10090.ENSMUSP00000004673,10090.ENSMUSP00000004774,10090.ENSMUSP00000005406,10090.ENSMUSP00000006467,10090.ENSMUSP00000013304,10090.ENSMUSP00000013773,10090.ENSMUSP00000015800,10090.ENSMUSP00000016400,10090.ENSMUSP00000017975,10090.ENSMUSP00000018651…	Ncs1,Itga3,Fxr1,Amph,Calb2,Eno2,Ndrg2,Aqp1,App,Arpc2,Atp6v0d1,Cad,Hspa8,Ctsz,Rab5a,Trpv2,Fxr2,Ap3d1,Ppp2ca,Pafah1b1,Exoc7,Dbn1,Clu,Dpysl2,Nefl,Gsk3b,Sncg,Twf2,Hsp90ab1,Kif5b,Bin1,Dpysl3,Slc1a1,Got1,Dctn2,Nrp1,Cplx2,Als2,Epha4,Kif5c,Tor1a,Snap25,Stmn2,Anxa5,Ptbp2,Calb1,Cdk5,Rufy3,P2rx4,Fscn1,Fkbp4,Cyfip1,Pak1,Rnf40,Rgs10,Ilk,Stim1,Ophn1,Flna,Syap1,Gpm6a,Tanc1,Prex1,Fkbp1a,Git1,Copg2,Cplx1,Hnrnpk,E…
GO:0042788	Polysomal ribosome	26	0.691092	bottom	0.00044	ks	10090.ENSMUSP00000004072,10090.ENSMUSP00000017548,10090.ENSMUSP00000020756,10090.ENSMUSP00000022163,10090.ENSMUSP00000022925,10090.ENSMUSP00000023269,10090.ENSMUSP00000026420,10090.ENSMUSP00000031617,10090.ENSMUSP00000036881,10090.ENSMUSP00000038135,10090.ENSMUSP00000046101,10090.ENSMUSP00000048469,10090.ENSMUSP00000054490,10090.ENSMUSP00000058368,10090.ENSMUSP00000058432,10090.ENSMUSP00000080203…	Rpl8,Rpl19,Pnpt1,Btf3,Eif3h,Rpl24,Rps26,Rpl6,Abcf1,Dhx9,Eef2,Rpl10a,Rps23,Rpl18a,Rps21,Rpl29,Rpl32,Nufip2,Rpl11,Rpl7a,Rpl38,Rpl18,Rpl30,Rps28,Larp1,Rpl31
GO:0044306	Neuron projection terminus	84	0.547924	top	0.00045	ks	10090.ENSMUSP00000000199,10090.ENSMUSP00000003345,10090.ENSMUSP00000003754,10090.ENSMUSP00000004774,10090.ENSMUSP00000006467,10090.ENSMUSP00000013304,10090.ENSMUSP00000013773,10090.ENSMUSP00000015800,10090.ENSMUSP00000017975,10090.ENSMUSP00000018700,10090.ENSMUSP00000020420,10090.ENSMUSP00000020608,10090.ENSMUSP00000021273,10090.ENSMUSP00000022629,10090.ENSMUSP00000023826,10090.ENSMUSP00000025239…	Ncs1,Amph,Calb2,Aqp1,Arpc2,Atp6v0d1,Cad,Hspa8,Rab5a,Dlg4,Ap3d1,Ppp2ca,Vamp2,Dpysl2,Sncg,Bin1,Slc1a1,Got1,Baiap2,Cplx2,Epha4,Anxa5,Calb1,Tmem57,Uchl1,P2rx4,Cyfip1,Rnf40,Rgs10,Ilk,Ophn1,Ptpn9,Tanc1,Fkbp1a,Git1,Cplx1,Hnrnpk,Sncb,Blvrb,Pacsin1,Pebp1,Lrrk2,Itga2,Kcna1,Prkca,Pfn2,Syp,Prkcb,Rpl26,Mob2,Glul,Slc8a1,Fmr1,Aak1,Erc2,Vti1a,Sept5,Snap91,Mical1,Prkcg,Actb,Nos1,Rapgef4,Slc4a10,Atp1a3,L1cam,Syt1,…
GO:0005587	Collagen type iv trimer	3	5.60059	top	0.0005	afc	10090.ENSMUSP00000033898,10090.ENSMUSP00000033899,10090.ENSMUSP00000109084	Col4a1,Col4a2,Col4a3
GO:0045177	Apical part of cell	177	0.317991	both ends	0.0005	ks	10090.ENSMUSP00000000590,10090.ENSMUSP00000000608,10090.ENSMUSP00000000939,10090.ENSMUSP00000002572,10090.ENSMUSP00000002603,10090.ENSMUSP00000003717,10090.ENSMUSP00000004684,10090.ENSMUSP00000004774,10090.ENSMUSP00000005406,10090.ENSMUSP00000006235,10090.ENSMUSP00000006435,10090.ENSMUSP00000007130,10090.ENSMUSP00000007799,10090.ENSMUSP00000008684,10090.ENSMUSP00000010191,10090.ENSMUSP00000010251…	Rdx,Gm2a,Hip1r,Slc9a3r2,Scrib,Abcb4,Arhgef18,Aqp1,App,Ctsb,Atp6v1b2,Ctnnb1,Cav1,Mgst1,Hyal2,Slc22a8,Amotl1,Atp6v0d1,Pten,Hsd11b1,Cd34,Myo1b,Atp6v1e1,Atp2b1,Nedd1,Egfr,Itgb3,Slc9a3r1,Lgmn,Ctsl,Osmr,Mtdh,Atp6v1c1,Fzd6,Hsp90ab1,Clic5,Cdh2,Pdgfrb,Anxa1,Fas,Adrbk1,Slc1a1,Ifitm3,Podxl,Atp1b1,Itga8,Rab14,Notch1,Pdia3,Jag1,Slc23a2,Car2,Ahcyl1,Vcam1,Enpep,Slc2a1,Akr1a1,Slc9a1,Vamp3,Nos3,P2rx4,Abcg2,Cd9,Sl…
GO:0098685	Schaffer collateral - CA1 synapse	62	0.704607	top	0.0005	ks	10090.ENSMUSP00000003268,10090.ENSMUSP00000007130,10090.ENSMUSP00000009538,10090.ENSMUSP00000014578,10090.ENSMUSP00000017458,10090.ENSMUSP00000018437,10090.ENSMUSP00000019577,10090.ENSMUSP00000020904,10090.ENSMUSP00000022639,10090.ENSMUSP00000023507,10090.ENSMUSP00000025246,10090.ENSMUSP00000025830,10090.ENSMUSP00000026436,10090.ENSMUSP00000027451,10090.ENSMUSP00000030212,10090.ENSMUSP00000030814…	Sh3gl1,Ctnnb1,Syn2,Plg,Mpp2,Pfn1,Gipc1,Rock2,Nefl,Gsk3b,Csnk2b,Apba1,Baiap2,Epha4,Sh3gl2,Cdk5,Itpr1,Cask,Plat,Akap12,Myo6,Cplx1,Ina,Slc30a1,Picalm,Ppp3ca,Cdc42,Ptprs,Ctnnd1,Pfn2,Syp,Dtnbp1,Ptpra,Cadm1,Fmr1,Itgb1,Nefh,Abr,Synpo,Snap91,Epn1,Fyn,Actb,Plcg1,Fbxl20,Capzb,L1cam,Ppp3r1,Camk2a,Dgkz,Tnr,Syn1,Synj1,Myo5a,Stat3,Stxbp5,Bcr,Rab11a,Ncam1,Anks1b,Iqsec1,Apbb1
GO:0048786	Presynaptic active zone	41	0.869382	top	0.00055	ks	10090.ENSMUSP00000001569,10090.ENSMUSP00000003961,10090.ENSMUSP00000004076,10090.ENSMUSP00000004375,10090.ENSMUSP00000005406,10090.ENSMUSP00000005509,10090.ENSMUSP00000007130,10090.ENSMUSP00000020107,10090.ENSMUSP00000020637,10090.ENSMUSP00000025166,10090.ENSMUSP00000025830,10090.ENSMUSP00000028727,10090.ENSMUSP00000029635,10090.ENSMUSP00000029911,10090.ENSMUSP00000031378,10090.ENSMUSP00000033075…	Flot1,Ppfia3,Grm3,Phb2,App,Stx1a,Ctnnb1,Atp2b1,Canx,Cdh2,Apba1,Snap25,Gucy1b3,Pnisr,Stx2,Stx4a,Gpm6a,Vps11,Sv2a,Cdh10,Cacna2d1,Ctnnd1,Syp,Flot2,C1qbp,Erc1,Ctbp1,Slc17a7,Atp2b2,Erc2,Stxbp1,Snap91,Cntnap1,Stx1b,Unc13b,Rab3a,Ppfibp1,Syn1,Atp2b4,Phb,Ctbp2
GO:0030133	Transport vesicle	185	0.355042	top	0.00063	ks	10090.ENSMUSP00000000058,10090.ENSMUSP00000000619,10090.ENSMUSP00000000727,10090.ENSMUSP00000003038,10090.ENSMUSP00000003121,10090.ENSMUSP00000003345,10090.ENSMUSP00000003550,10090.ENSMUSP00000005067,10090.ENSMUSP00000005406,10090.ENSMUSP00000005509,10090.ENSMUSP00000007236,10090.ENSMUSP00000007803,10090.ENSMUSP00000009538,10090.ENSMUSP00000010038,10090.ENSMUSP00000013304,10090.ENSMUSP00000014221…	Cav2,Clcn4-2,Rab5b,Ap2a2,Rab8a,Amph,Ncstn,Sgta,App,Stx1a,Syngr3,Bcl2l1,Syn2,Snap47,Atp6v0d1,Chp1,Hspa8,Vps45,Rab5a,Sept4,Dlg4,Slc2a4,Rab5c,Gipc1,Stx7,Sar1a,Sar1b,Rab10,Vamp2,Gosr2,Sec23a,Chga,Pdcd6,Scamp1,Vdac2,Igf2r,Atp6v0c,Bin1,Apba1,Syngr2,Cops5,Slc40a1,Stx6,Tor1a,Rab14,Snap25,Sec23b,Anxa5,Sec22b,Sh3gl2,Slc6a9,Ppt1,Stx12,Vamp3,Uso1,Stx2,Rab35,Tmem168,Itpr1,Sec13,Slc2a3,Vamp1,Vps33b,Rab6a,Stx4a…
GO:0097449	Astrocyte projection	11	2.13231	top	0.00075	afc	10090.ENSMUSP00000004076,10090.ENSMUSP00000005406,10090.ENSMUSP00000034211,10090.ENSMUSP00000047353,10090.ENSMUSP00000054356,10090.ENSMUSP00000063734,10090.ENSMUSP00000064691,10090.ENSMUSP00000071214,10090.ENSMUSP00000078088,10090.ENSMUSP00000079100,10090.ENSMUSP00000109633	Grm3,App,Mt3,Atp1b2,Kcnj10,Ezr,Gfap,Eif2s1,Aqp4,Slc1a2,Dmd
GO:0031594	Neuromuscular junction	46	1.09435	top	0.00085	ks	10090.ENSMUSP00000005406,10090.ENSMUSP00000005606,10090.ENSMUSP00000006293,10090.ENSMUSP00000007236,10090.ENSMUSP00000015791,10090.ENSMUSP00000017276,10090.ENSMUSP00000018700,10090.ENSMUSP00000019992,10090.ENSMUSP00000022638,10090.ENSMUSP00000022639,10090.ENSMUSP00000026649,10090.ENSMUSP00000027409,10090.ENSMUSP00000027451,10090.ENSMUSP00000027467,10090.ENSMUSP00000027752,10090.ENSMUSP00000028991…	App,Prkaca,Crkl,Syngr3,Lama5,Cyth1,Dlg4,Lama4,Nefm,Nefl,Syngr2,Des,Epha4,Serpine2,Lamc1,Snta1,Cdk5,Vamp1,Fchsd2,Pls3,Sv2a,Dnaja3,Prkar1a,Dlg1,Lamb2,Syp,Dnajc5,Rph3a,Itgb1,Lama2,Tuba1a,Prkce,Itga7,Psen1,Ptn,Stx1b,Camk2d,Unc13b,Trip4,Syt2,Stxbp5,Dlgap4,Tbc1d24,Synj2bp,Apbb1,Erbb2ip
GO:0030672	Synaptic vesicle membrane	67	0.660919	top	0.0012	ks	10090.ENSMUSP00000000727,10090.ENSMUSP00000003345,10090.ENSMUSP00000005067,10090.ENSMUSP00000005509,10090.ENSMUSP00000007236,10090.ENSMUSP00000007803,10090.ENSMUSP00000009538,10090.ENSMUSP00000010038,10090.ENSMUSP00000017975,10090.ENSMUSP00000019317,10090.ENSMUSP00000020174,10090.ENSMUSP00000021001,10090.ENSMUSP00000021273,10090.ENSMUSP00000022197,10090.ENSMUSP00000025239,10090.ENSMUSP00000026649…	Rab5b,Amph,Sgta,Stx1a,Syngr3,Bcl2l1,Syn2,Snap47,Rab5a,Rab5c,Stx7,Rab10,Vamp2,Scamp1,Bin1,Syngr2,Stx6,Rab14,Sh3gl2,Slc6a9,Stx12,Vamp3,Rab35,Slc2a3,Vamp1,Lamp1,Sv2a,Atp8a1,Atp6v0a1,Wfs1,Vamp4,Vamp7,Lrrk2,Rab2a,Ptprs,Pi4k2a,Syp,Atp6v1g2,Dtnbp1,Dnajc5,Sypl,Rph3a,Slc17a7,Stx16,Cltb,Rab4b,Cltc,Syt1,Clta,Unc13b,Rab3a,Rab7,Dmd,Snca,Rab11b,Sema4c,Syn1,Dnm1l,Syt2,Sept8,Dmxl2,Rab4a,Rab27b,Snapin,Prrt2,Sv2b,…
GO:0031225	Anchored component of membrane	47	0.542297	top	0.0016	ks	10090.ENSMUSP00000000109,10090.ENSMUSP00000000727,10090.ENSMUSP00000003436,10090.ENSMUSP00000010191,10090.ENSMUSP00000017458,10090.ENSMUSP00000017975,10090.ENSMUSP00000018700,10090.ENSMUSP00000019317,10090.ENSMUSP00000020399,10090.ENSMUSP00000021001,10090.ENSMUSP00000027394,10090.ENSMUSP00000028238,10090.ENSMUSP00000028727,10090.ENSMUSP00000029574,10090.ENSMUSP00000030198,10090.ENSMUSP00000030551…	Cntn1,Rab5b,Abhd17a,Hyal2,Mpp2,Rab5a,Dlg4,Rab5c,Cpm,Rab10,Zfand2b,Rab14,Snap25,Vcam1,Reck,Alpl,Rab35,Gpc4,Sema7a,Enpp6,Gpc1,Cd59a,Cacna2d1,Bst2,Marcksl1,Ly6e,Vti1b,Rab2a,Ly6c1,Flot2,Dnajc5,Ntm,Lsamp,Cp,Rab4b,Car4,Folr1,Rab3a,Rab7,Rab11b,Thy1,Syn1,Cdh13,Rab4a,Rab27b,Ncam1,Ly6a
GO:0060076	Excitatory synapse	24	0.967525	top	0.0017	ks	10090.ENSMUSP00000001548,10090.ENSMUSP00000003754,10090.ENSMUSP00000018437,10090.ENSMUSP00000018700,10090.ENSMUSP00000021950,10090.ENSMUSP00000026436,10090.ENSMUSP00000030269,10090.ENSMUSP00000032629,10090.ENSMUSP00000034076,10090.ENSMUSP00000051092,10090.ENSMUSP00000069429,10090.ENSMUSP00000074578,10090.ENSMUSP00000082489,10090.ENSMUSP00000086398,10090.ENSMUSP00000096096,10090.ENSMUSP00000099759…	Itga3,Calb2,Pfn1,Dlg4,Dbn1,Baiap2,Slc6a9,Cyfip1,Cbln1,Picalm,Syp,Ntm,Slc17a7,Atp2b2,Snap91,Rapgef4,Ppp3r1,Syt1,Shank3,Cadm3,Cntnap2,Palld,Synj1,Actr3
GO:0099523	Presynaptic cytosol	19	1.35661	top	0.0017	afc	10090.ENSMUSP00000000199,10090.ENSMUSP00000015800,10090.ENSMUSP00000026436,10090.ENSMUSP00000029876,10090.ENSMUSP00000030212,10090.ENSMUSP00000043074,10090.ENSMUSP00000052584,10090.ENSMUSP00000055637,10090.ENSMUSP00000062392,10090.ENSMUSP00000070019,10090.ENSMUSP00000078945,10090.ENSMUSP00000085906,10090.ENSMUSP00000094874,10090.ENSMUSP00000097874,10090.ENSMUSP00000099952,10090.ENSMUSP00000104731…	Ncs1,Hspa8,Baiap2,Calb1,Sh3gl2,Sncb,Lrrk2,Marcksl1,Prkca,Prkcb,Htt,Fmr1,Prkce,Prkcg,Camk2a,Hnrnpab,Stxbp5,Ctbp2,Anks1b
GO:0098644	Complex of collagen trimers	9	2.22633	top	0.0022	afc	10090.ENSMUSP00000001547,10090.ENSMUSP00000031668,10090.ENSMUSP00000033898,10090.ENSMUSP00000033899,10090.ENSMUSP00000040877,10090.ENSMUSP00000083620,10090.ENSMUSP00000085192,10090.ENSMUSP00000089793,10090.ENSMUSP00000109084	Col1a1,Col1a2,Col4a1,Col4a2,Lum,Col5a2,Col3a1,Col11a1,Col4a3
GO:0000790	Nuclear chromatin	140	0.344228	bottom	0.0023	ks	10090.ENSMUSP00000000129,10090.ENSMUSP00000000925,10090.ENSMUSP00000001326,10090.ENSMUSP00000002699,10090.ENSMUSP00000004494,10090.ENSMUSP00000005503,10090.ENSMUSP00000005705,10090.ENSMUSP00000007130,10090.ENSMUSP00000009099,10090.ENSMUSP00000009120,10090.ENSMUSP00000009699,10090.ENSMUSP00000016081,10090.ENSMUSP00000019911,10090.ENSMUSP00000020283,10090.ENSMUSP00000020649,10090.ENSMUSP00000021052…	Fer,Smarcb1,Sp1,Akap8,Sin3b,Msh6,Trim28,Ctnnb1,Mta1,Gabpa,Cdk9,H2afy,Hdac2,H2afy2,Rad50,Smarcd2,Yy1,Crebbp,Smarcd1,Calcoco1,Ring1,Smad4,Smarca2,Rela,Actl6a,Pole3,Psip1,Nasp,Dffa,Cbx3,Ruvbl1,Kat8,Rbbp7,Mecp2,Mre11a,Smarca4,Cdk13,Ipo4,Ccar2,Dhx9,Kat6a,Hnrnpk,Gatad2b,Supt16,Mcrs1,Smarca5,Hist1h1d,Hist1h1c,Zbtb7a,Nthl1,Setd1a,Rbmxl1,Ep400,Polr2a,H2afx,Ino80,Foxc1,Hist1h1e,Men1,Nipbl,Chd4,Hist1h1a,Nuc…
GO:0015934	Large ribosomal subunit	66	0.454869	bottom	0.0028	ks	10090.ENSMUSP00000000756,10090.ENSMUSP00000001485,10090.ENSMUSP00000002844,10090.ENSMUSP00000004072,10090.ENSMUSP00000008036,10090.ENSMUSP00000008826,10090.ENSMUSP00000015816,10090.ENSMUSP00000017548,10090.ENSMUSP00000019026,10090.ENSMUSP00000020820,10090.ENSMUSP00000022245,10090.ENSMUSP00000023269,10090.ENSMUSP00000025745,10090.ENSMUSP00000025836,10090.ENSMUSP00000027464,10090.ENSMUSP00000029786…	Rpl13,Mrpl10,Mrpl2,Rpl8,Rplp1,Rpl10,Mrpl32,Rpl19,Mrpl45,Mrpl22,Mrps30,Rpl24,Mrpl21,Mrpl11,Mrpl44,Mrpl9,Mrpl37,Mrpl33,Rpl6,Rpl28,Mrpl46,Ndufab1,Rpl4,Mrpl3,Rpl21,Mrpl41,Mrpl12,Rpl10a,Rpl18a,Rpl37a,Rpl7,Rpl26,Npm1,Rpl17,Rpl15,Rpl36,Rpl35,Rpl29,Rpl3,Rpl32,Rpl5,Rplp2,Rplp0,Rpl34,Rpl27,Rpl7l1,Rpl23,Rpl23a,Rpl11,Rpl7a,Rpl38,Rpl18,Rpl30,Rpl36al,Rpl9,Rpl35a,Mrpl39,Mrpl24,Mrpl15,Rpl13a,Ict1,Mrpl17,Rpl22,Mr…
GO:0016528	Sarcoplasm	40	0.332203	both ends	0.0029	ks	10090.ENSMUSP00000003912,10090.ENSMUSP00000004137,10090.ENSMUSP00000014920,10090.ENSMUSP00000017961,10090.ENSMUSP00000018710,10090.ENSMUSP00000020238,10090.ENSMUSP00000020285,10090.ENSMUSP00000021142,10090.ENSMUSP00000024866,10090.ENSMUSP00000028239,10090.ENSMUSP00000029454,10090.ENSMUSP00000030830,10090.ENSMUSP00000031423,10090.ENSMUSP00000031779,10090.ENSMUSP00000032192,10090.ENSMUSP00000033289…	Calr,Gstm7,Nol3,Jph2,Slc2a4,Hsp90b1,Sar1a,Atp2a3,Xdh,Gsn,Casq2,H6pd,Atp2a2,Calu,Itpr1,Stim1,Fkbp1a,Itpr3,Tmem109,Mtmr12,Thbs1,Pygm,Syne2,Cacna2d1,Itpr2,S100a1,Fabp3,Camk2g,Dtnbp1,Plec,Asph,Cherp,Car4,Nos1,Camk2d,Camk2b,Ank1,Mrvi1,Sri,Manf
GO:0016607	Nuclear speck	192	0.254265	bottom	0.0029	ks	10090.ENSMUSP00000000451,10090.ENSMUSP00000001043,10090.ENSMUSP00000001818,10090.ENSMUSP00000002198,10090.ENSMUSP00000002529,10090.ENSMUSP00000003313,10090.ENSMUSP00000004200,10090.ENSMUSP00000004389,10090.ENSMUSP00000004990,10090.ENSMUSP00000005041,10090.ENSMUSP00000005606,10090.ENSMUSP00000005749,10090.ENSMUSP00000005830,10090.ENSMUSP00000006625,10090.ENSMUSP00000007007,10090.ENSMUSP00000007042…	Raf1,Chtop,Crnkl1,Sf3a1,Prpf6,Grk5,Cwc15,Grcc10,Mapk14,U2af2,Prkaca,Ctr9,Bcas2,Rbm14,Wtap,Ik,Snrpb2,Prpf31,Nxf1,U2af1,Prpf3,Zc3h18,Prpf8,Sart3,Ddx39,Rufy1,Slu7,Smek2,Nampt,Smc6,Ddx42,Luc7l3,Eftud2,Pnn,Srp54a,Snw1,Nrde2,Ylpm1,Skiv2l2,Pspc1,Tkt,Bnip3l,Acin1,Pabpn1,Phf5a,Cdc5l,Thoc1,Ring1,Tap2,Cxxc1,Smndc1,Alyref,Eif4a3,Thoc3,Sf3b1,Trip12,Api5,Dhx36,Ccnl1,Pnisr,Smu1,Ppie,Syf2,Sfpq,Ppp1r8,Sf3a3,Dhx15…
GO:0005681	Spliceosomal complex	137	0.257739	bottom	0.0032	ks	10090.ENSMUSP00000001419,10090.ENSMUSP00000001809,10090.ENSMUSP00000001818,10090.ENSMUSP00000002198,10090.ENSMUSP00000002529,10090.ENSMUSP00000002551,10090.ENSMUSP00000004200,10090.ENSMUSP00000005041,10090.ENSMUSP00000005830,10090.ENSMUSP00000007042,10090.ENSMUSP00000007266,10090.ENSMUSP00000007993,10090.ENSMUSP00000008477,10090.ENSMUSP00000008517,10090.ENSMUSP00000011450,10090.ENSMUSP00000014684…	Zmat2,Pabpc1,Crnkl1,Sf3a1,Prpf6,Snrpd1,Cwc15,U2af2,Bcas2,Ik,Lsm2,Rbm28,Snrpb2,Prpf31,Sugp1,U2af1,Hspa8,Prpf3,Prpf8,Dhx40,Xab2,Ccdc12,Snrpd3,Slu7,Ddx5,Luc7l3,Eftud2,Pnn,Snw1,Ddx41,Ppwd1,Cwc27,Skiv2l2,Phf5a,Cdc5l,Ppil1,Rbm22,Smndc1,Alyref,Cwf19l1,Eif4a3,Sf3b1,Ncl,BC005624,Api5,Aar2,Ctnnbl1,Prpf38b,Ptbp2,Smu1,Ppie,Syf2,Ppp1r8,Sf3a3,Rheb,Dhx15,Tfip11,Zcchc8,Tra2a,Magohb,Rbmx2,Frg1,Lsm4,Snrpd2,Rbm3,Hn…
GO:0098797	Plasma membrane protein complex	151	0.415799	top	0.0032	ks	10090.ENSMUSP00000000001,10090.ENSMUSP00000000058,10090.ENSMUSP00000000299,10090.ENSMUSP00000000542,10090.ENSMUSP00000001548,10090.ENSMUSP00000001569,10090.ENSMUSP00000001592,10090.ENSMUSP00000003038,10090.ENSMUSP00000003550,10090.ENSMUSP00000004646,10090.ENSMUSP00000005509,10090.ENSMUSP00000005671,10090.ENSMUSP00000007130,10090.ENSMUSP00000007216,10090.ENSMUSP00000007799,10090.ENSMUSP00000013304…	Gnai3,Cav2,Itgb2,Acvrl1,Itga3,Flot1,Jup,Ap2a2,Ncstn,Coro1c,Stx1a,Igf1r,Ctnnb1,Ap2m1,Cav1,Atp6v0d1,Cybb,Cd40,Dlg4,Ap2b1,Atp6ap1,Rnf31,Lin7a,Gna13,Itgb3,Slc9a3r1,Grb2,Vamp2,Osmr,Itga5,Alcam,Tfrc,Krt8,Tbc1d5,Cdh2,Gnaq,Gna14,Fas,Chuk,Sacm1l,Itgb8,Casp8,Atp1b1,Itga8,Itgav,Itga6,Lin7c,Snap25,Snta1,Vcam1,Sdcbp,Stoml2,Gnb1,Gng11,Gnb2,Slc6a6,Ikbkb,Cdh5,Atp1b3,Trf,Pgm5,Gnaz,Fkbp1a,Sntb2,Tmed10,Lyn,Atp1a1,S…
GO:0000792	Heterochromatin	42	0.436124	bottom	0.0034	ks	10090.ENSMUSP00000001989,10090.ENSMUSP00000002825,10090.ENSMUSP00000004202,10090.ENSMUSP00000005705,10090.ENSMUSP00000006301,10090.ENSMUSP00000016081,10090.ENSMUSP00000019911,10090.ENSMUSP00000022450,10090.ENSMUSP00000025183,10090.ENSMUSP00000027198,10090.ENSMUSP00000029989,10090.ENSMUSP00000030207,10090.ENSMUSP00000031862,10090.ENSMUSP00000031984,10090.ENSMUSP00000033088,10090.ENSMUSP00000033179…	Uba1,Baz1b,Dnmt1,Trim28,Lrwd1,H2afy,Hdac2,Fam208a,Ring1,Orc2,Rnf20,Psip1,Cbx3,Smarcad1,Rnf40,Rrp8,Mecp2,Smarca4,Gltscr2,Foxc1,Hist1h1e,Hmga2,Sirt2,Mbd2,Rnf2,Hist1h1b,Aldoa,Sumo1,Mbd3,Cbx1,Mbd1,Hdac1,Hmga1-rs1,Phc2,Eed,Tnks1bp1,Atrx,Mphosph8,Cbx5,Tcp1,Cenpa,Ddx6
GO:0015935	Small ribosomal subunit	53	0.445939	bottom	0.0034	ks	10090.ENSMUSP00000000365,10090.ENSMUSP00000003521,10090.ENSMUSP00000004554,10090.ENSMUSP00000006496,10090.ENSMUSP00000008812,10090.ENSMUSP00000020640,10090.ENSMUSP00000024486,10090.ENSMUSP00000025511,10090.ENSMUSP00000026420,10090.ENSMUSP00000028852,10090.ENSMUSP00000029387,10090.ENSMUSP00000029722,10090.ENSMUSP00000030675,10090.ENSMUSP00000031978,10090.ENSMUSP00000032840,10090.ENSMUSP00000032998…	Mcts1,Rps11,Rps5,Rps9,Rps18,Gnb2l1,Mrps23,Rps14,Rps26,Mrps5,Eif2a,Rps3a1,Mrps15,Mrps33,Mrps11,Rps3,Rps4x,Mrps31,Mrps22,Rpsa,Dhx29,Mrps2,Mrps6,Mrps34,Rps27l,Mrps35,Rps23,Mrps9,Rps21,Mrps27,Mrps21,Rps15,Rps7,Npm1,Rps25,Rps17,Dap3,Rps2,Rps8,Rps6,Rps27a,Rps16,Rps19,Mrps36,Rps28,Rps10,Mrps10,Mrps17,Rps15a,Rps20,Rps24,Rps13,Fau
GO:0000791	Euchromatin	23	0.670714	bottom	0.0038	ks	10090.ENSMUSP00000001326,10090.ENSMUSP00000005705,10090.ENSMUSP00000007130,10090.ENSMUSP00000031862,10090.ENSMUSP00000034707,10090.ENSMUSP00000044395,10090.ENSMUSP00000045409,10090.ENSMUSP00000045816,10090.ENSMUSP00000047672,10090.ENSMUSP00000048153,10090.ENSMUSP00000050771,10090.ENSMUSP00000057308,10090.ENSMUSP00000062030,10090.ENSMUSP00000070957,10090.ENSMUSP00000075476,10090.ENSMUSP00000079356…	Sp1,Trim28,Ctnnb1,Cbx3,Smarca4,Hist1h1d,Ogt,Hist1h1c,Setd1a,Rbmxl1,Polr2a,Hist1h1e,Hist1h1a,Ash2l,Rnf2,Hist1h1b,Klf4,Ruvbl2,Rbmx,Prdx1,Tbp,H1f0,Creb1
GO:0044304	Main axon	37	0.600048	top	0.004	ks	10090.ENSMUSP00000005406,10090.ENSMUSP00000017799,10090.ENSMUSP00000018700,10090.ENSMUSP00000025239,10090.ENSMUSP00000037819,10090.ENSMUSP00000041925,10090.ENSMUSP00000046185,10090.ENSMUSP00000055225,10090.ENSMUSP00000064280,10090.ENSMUSP00000067241,10090.ENSMUSP00000068374,10090.ENSMUSP00000071135,10090.ENSMUSP00000072732,10090.ENSMUSP00000076577,10090.ENSMUSP00000079100,10090.ENSMUSP00000083073…	App,Cd40,Dlg4,Bin1,Myo1d,Cldn5,Mbp,Kcna1,Dlg1,Nav1,Map1b,Tubb4a,Sirt2,Map2,Slc1a2,Cadm1,Mapk8ip3,Ermn,Dnm1,Nfasc,Map1a,Sptan1,Mapt,Cntnap1,Sptbn1,Camk2d,Epb4.1l3,Mgll,Cntnap2,Thy1,Ank1,Kcnab2,Pard3,Tiam1,Dag1,Mag,Apbb1
GO:0005719	Nuclear euchromatin	21	0.716886	bottom	0.0041	ks	10090.ENSMUSP00000001326,10090.ENSMUSP00000005705,10090.ENSMUSP00000007130,10090.ENSMUSP00000031862,10090.ENSMUSP00000034707,10090.ENSMUSP00000044395,10090.ENSMUSP00000045816,10090.ENSMUSP00000047672,10090.ENSMUSP00000048153,10090.ENSMUSP00000050771,10090.ENSMUSP00000057308,10090.ENSMUSP00000062030,10090.ENSMUSP00000070957,10090.ENSMUSP00000079356,10090.ENSMUSP00000103245,10090.ENSMUSP00000103400…	Sp1,Trim28,Ctnnb1,Cbx3,Smarca4,Hist1h1d,Hist1h1c,Setd1a,Rbmxl1,Polr2a,Hist1h1e,Hist1h1a,Ash2l,Hist1h1b,Klf4,Ruvbl2,Rbmx,Prdx1,Tbp,H1f0,Creb1
GO:0009897	External side of plasma membrane	106	0.69306	both ends	0.0044	ks	10090.ENSMUSP00000000299,10090.ENSMUSP00000001548,10090.ENSMUSP00000001569,10090.ENSMUSP00000001963,10090.ENSMUSP00000003512,10090.ENSMUSP00000003912,10090.ENSMUSP00000006235,10090.ENSMUSP00000009705,10090.ENSMUSP00000014578,10090.ENSMUSP00000016638,10090.ENSMUSP00000017799,10090.ENSMUSP00000017841,10090.ENSMUSP00000018710,10090.ENSMUSP00000020301,10090.ENSMUSP00000021028,10090.ENSMUSP00000021933…	Itgb2,Itga3,Flot1,Ace,Fcgrt,Calr,Ctsb,Eng,Plg,Cd34,Cd40,Ada,Slc2a4,Vsir,Itgb3,Ctsl,Osmr,Itga5,Alcam,Tfrc,Anxa1,Fas,P4hb,Serpine2,Fcgr2b,Itgav,Itga6,F2,Anxa5,Vcam1,Enpep,B4galt1,Abcg2,Clec2d,Cd9,Mfge8,Gpc4,Lamp1,Gsr,Cdh5,Mcam,Ldlr,Trf,Fgg,Fgb,Slc7a5,Sema7a,Lrp1,Thbs1,Atp1b2,Cd59a,S1pr1,Clptm1,Itga2,Tgfbr2,Ceacam2,Ly6c1,Itgam,Capn2,Ackr3,Cxcl12,Cr1l,Cd97,Rnpep,Itga1,Aqp4,Pecam1,Adam9,Icam1,Itgb1,In…
GO:0030141	Secretory granule	138	0.589118	top	0.0045	ks	10090.ENSMUSP00000000001,10090.ENSMUSP00000000058,10090.ENSMUSP00000000199,10090.ENSMUSP00000001547,10090.ENSMUSP00000002678,10090.ENSMUSP00000003038,10090.ENSMUSP00000003572,10090.ENSMUSP00000003912,10090.ENSMUSP00000003961,10090.ENSMUSP00000004774,10090.ENSMUSP00000005509,10090.ENSMUSP00000005606,10090.ENSMUSP00000006467,10090.ENSMUSP00000007216,10090.ENSMUSP00000007799,10090.ENSMUSP00000009157…	Gnai3,Cav2,Ncs1,Col1a1,Tgfb1,Ap2a2,Gars,Calr,Ppfia3,Aqp1,Stx1a,Prkaca,Arpc2,Ap2m1,Cav1,Dynll1,Rab5a,Slc2a4,Sparc,Stx7,Mpo,Rab10,Vamp2,Actn1,Chga,Hexb,Scamp1,Vdac2,Anxa11,Clu,Ebag9,Sod1,Treml1,Fas,Hexa,Baiap2,Hgs,Hspd1,Serpine2,Tor1a,Rab14,Notch1,Pdia3,Adam15,Vamp3,Cd38,Pf4,Cct6a,Anxa3,Itpr1,Slc2a3,Vamp1,Vps33b,Stx4a,Sytl4,Lamp1,Plat,Rab27a,Ctsh,Fgg,Tmed10,Itpr3,Atp2c1,Exoc3,Fgb,Atp6v0a2,Smpd1,Atp…
GO:0016324	Apical plasma membrane	139	0.347825	both ends	0.0053	ks	10090.ENSMUSP00000000590,10090.ENSMUSP00000000608,10090.ENSMUSP00000000939,10090.ENSMUSP00000002572,10090.ENSMUSP00000002603,10090.ENSMUSP00000003717,10090.ENSMUSP00000004684,10090.ENSMUSP00000004774,10090.ENSMUSP00000006235,10090.ENSMUSP00000006435,10090.ENSMUSP00000007799,10090.ENSMUSP00000010191,10090.ENSMUSP00000010251,10090.ENSMUSP00000013220,10090.ENSMUSP00000013304,10090.ENSMUSP00000013807…	Rdx,Gm2a,Hip1r,Slc9a3r2,Scrib,Abcb4,Arhgef18,Aqp1,Ctsb,Atp6v1b2,Cav1,Hyal2,Slc22a8,Amotl1,Atp6v0d1,Pten,Cd34,Atp6v1e1,Atp2b1,Egfr,Itgb3,Slc9a3r1,Ctsl,Osmr,Mtdh,Fzd6,Hsp90ab1,Clic5,Cdh2,Pdgfrb,Anxa1,Fas,Adrbk1,Slc1a1,Podxl,Atp1b1,Rab14,Notch1,Pdia3,Jag1,Slc23a2,Ahcyl1,Enpep,Slc2a1,Akr1a1,Slc9a1,Vamp3,Abcg2,Cd9,Slco2b1,Stx4a,Mst4,Sytl4,Rab27a,Tmem30a,Trf,Slc16a2,Atp1a1,Abcb1a,Slc7a5,Cd81,Dpp4,Slc16…
GO:0016469	Proton-transporting two-sector atpase complex	28	0.416874	top	0.0053	ks	10090.ENSMUSP00000004396,10090.ENSMUSP00000006435,10090.ENSMUSP00000013304,10090.ENSMUSP00000016396,10090.ENSMUSP00000019231,10090.ENSMUSP00000019354,10090.ENSMUSP00000021536,10090.ENSMUSP00000021719,10090.ENSMUSP00000022904,10090.ENSMUSP00000023608,10090.ENSMUSP00000023677,10090.ENSMUSP00000024932,10090.ENSMUSP00000026459,10090.ENSMUSP00000026495,10090.ENSMUSP00000039737,10090.ENSMUSP00000040756…	Atp6v1f,Atp6v1b2,Atp6v0d1,Atp5e,Atp6ap1,Atp6v1e1,Atp6v1d,Mp68,Atp6v1c1,Atp5j,Atp5o,Atp6v0c,Atp5b,Atp5a1,Atp6v0a2,Atp6v1h,Atp6v0a1,Atp6v1g1,Atp5k,Atp6v1g2,Usmg5,Atp5d,Atp5h,Atp5g1,Atp6v1a,Atp5c1,Atp5f1,Atp5j2
GO:0043259	laminin-10 complex	3	4.33211	top	0.0053	afc	10090.ENSMUSP00000002979,10090.ENSMUSP00000015791,10090.ENSMUSP00000027752	Lamb1,Lama5,Lamc1
GO:0045121	Membrane raft	188	0.24483	top	0.006	ks	10090.ENSMUSP00000000001,10090.ENSMUSP00000000058,10090.ENSMUSP00000000109,10090.ENSMUSP00000000299,10090.ENSMUSP00000001566,10090.ENSMUSP00000001569,10090.ENSMUSP00000003207,10090.ENSMUSP00000003717,10090.ENSMUSP00000004378,10090.ENSMUSP00000004646,10090.ENSMUSP00000004774,10090.ENSMUSP00000005406,10090.ENSMUSP00000005606,10090.ENSMUSP00000005671,10090.ENSMUSP00000007130,10090.ENSMUSP00000007799…	Gnai3,Cav2,Cntn1,Itgb2,Tubb5,Flot1,Lipe,Abcb4,Eno2,Coro1c,Aqp1,App,Prkaca,Igf1r,Ctnnb1,Cav1,Gprc5b,Hyal2,Plcd1,Hspa8,Slc25a5,Crk,Rab5a,Ptgis,Slc2a4,Smpd2,Atp2b1,Egfr,Ppp2ca,Slc9a3r1,Vdac2,Vcl,Gsk3b,Cdh2,Npc1,Gnaq,Fas,Adrbk1,Atp5b,Atp5a1,Podxl,Hspd1,Casp8,Atp1b1,Fcgr2b,Stom,Snap25,Src,Lamtor2,Sdcbp,Stoml2,Slc2a1,Ppt1,Slc9a1,Stx12,Park7,Nos3,Stx2,Abcg2,Add2,Itpr1,Ldhb,Kras,Slc2a3,Lamtor1,Tpp1,Stim1…
GO:0005761	Mitochondrial ribosome	42	0.241646	top	0.0067	ks	10090.ENSMUSP00000001485,10090.ENSMUSP00000002844,10090.ENSMUSP00000015816,10090.ENSMUSP00000019026,10090.ENSMUSP00000020820,10090.ENSMUSP00000022245,10090.ENSMUSP00000024486,10090.ENSMUSP00000025745,10090.ENSMUSP00000025836,10090.ENSMUSP00000027464,10090.ENSMUSP00000028852,10090.ENSMUSP00000029786,10090.ENSMUSP00000030365,10090.ENSMUSP00000030675,10090.ENSMUSP00000031024,10090.ENSMUSP00000031978…	Mrpl10,Mrpl2,Mrpl32,Mrpl45,Mrpl22,Mrps30,Mrps23,Mrpl21,Mrpl11,Mrpl44,Mrps5,Mrpl9,Mrpl37,Mrps15,Mrpl33,Mrps33,Mrps11,Mrpl46,Ndufab1,Mrps31,Mrps22,Mrpl3,Mrps2,Mrps6,Ndufa7,Mrpl41,Mrpl12,Mrps34,Mrps35,Mrps9,Mrps27,Mrps21,Dap3,Mrps36,Mrpl39,Mrps10,Mrpl24,Mrps17,Mrpl15,Ict1,Mrpl17,Mrpl16
GO:0098857	Membrane microdomain	189	0.242038	top	0.0078	ks	10090.ENSMUSP00000000001,10090.ENSMUSP00000000058,10090.ENSMUSP00000000109,10090.ENSMUSP00000000299,10090.ENSMUSP00000001566,10090.ENSMUSP00000001569,10090.ENSMUSP00000003207,10090.ENSMUSP00000003717,10090.ENSMUSP00000004378,10090.ENSMUSP00000004646,10090.ENSMUSP00000004774,10090.ENSMUSP00000005406,10090.ENSMUSP00000005606,10090.ENSMUSP00000005671,10090.ENSMUSP00000007130,10090.ENSMUSP00000007799…	Gnai3,Cav2,Cntn1,Itgb2,Tubb5,Flot1,Lipe,Abcb4,Eno2,Coro1c,Aqp1,App,Prkaca,Igf1r,Ctnnb1,Cav1,Gprc5b,Hyal2,Plcd1,Hspa8,Slc25a5,Crk,Rab5a,Ptgis,Slc2a4,Smpd2,Atp2b1,Egfr,Ppp2ca,Slc9a3r1,Vdac2,Vcl,Gsk3b,Cdh2,Npc1,Gnaq,Fas,Adrbk1,Atp5b,Atp5a1,Podxl,Hspd1,Casp8,Atp1b1,Fcgr2b,Stom,Snap25,Src,Lamtor2,Sdcbp,Stoml2,Slc2a1,Ppt1,Slc9a1,Stx12,Park7,Nos3,Stx2,Abcg2,Add2,Itpr1,Ldhb,Kras,Slc2a3,Lamtor1,Tpp1,Stim1…

## Sheet: KEGG
#term ID	term description	genes mapped	enrichment score	direction	false discovery rate	method	matching proteins in your input (IDs)	matching proteins in your input (labels)
mmu00190	Oxidative phosphorylation	94	0.41463	top	2.03e-08	ks	10090.ENSMUSP00000000090,10090.ENSMUSP00000002452,10090.ENSMUSP00000004396,10090.ENSMUSP00000005647,10090.ENSMUSP00000006435,10090.ENSMUSP00000010007,10090.ENSMUSP00000013304,10090.ENSMUSP00000013737,10090.ENSMUSP00000014438,10090.ENSMUSP00000014457,10090.ENSMUSP00000016396,10090.ENSMUSP00000016571,10090.ENSMUSP00000019231,10090.ENSMUSP00000019354,10090.ENSMUSP00000020286,10090.ENSMUSP00000020372…	Cox5a,Ndufa11,Atp6v1f,Ndufs3,Atp6v1b2,Sdhb,Atp6v0d1,Ndufs2,Ndufa2,Cox6c,Atp5e,Ndufa1,Atp6ap1,Atp6v1e1,Ppa1,Uqcr11,Atp6v1d,Uqcrb,Sdha,Ndufs6,Ndufs4,Atp6v1c1,Ndufb9,Ndufa6,Cyc1,Ndufb4,Atp5j,Atp5o,Ndufa5,Atp6v0c,Ndufb8,Atp5b,Atp5a1,Uqcrc1,Ndufs1,Ndufb3,Ndufa10,Ppa2,Ndufs5,Ndufa4,Ndufc2,Ndufab1,Uqcrc2,Lhpp,Cox4i1,Cox7a2,Ndufb7,Gm11273,Ndufa7,Atp6v0a2,Atp6v1h,Cox15,Ndufa4l2,Ndufv1,Ndufb10,Atp6v0a1,Uqc…
mmu03010	Ribosome	97	0.556023	bottom	2.03e-08	ks	10090.ENSMUSP00000000756,10090.ENSMUSP00000001485,10090.ENSMUSP00000002844,10090.ENSMUSP00000003521,10090.ENSMUSP00000004072,10090.ENSMUSP00000004554,10090.ENSMUSP00000006496,10090.ENSMUSP00000008036,10090.ENSMUSP00000008812,10090.ENSMUSP00000008826,10090.ENSMUSP00000015816,10090.ENSMUSP00000017548,10090.ENSMUSP00000020820,10090.ENSMUSP00000023269,10090.ENSMUSP00000025511,10090.ENSMUSP00000025745…	Rpl13,Mrpl10,Mrpl2,Rps11,Rpl8,Rps5,Rps9,Rplp1,Rps18,Rpl10,Mrpl32,Rpl19,Mrpl22,Rpl24,Rps14,Mrpl21,Mrpl11,Rps26,Mrps5,Rps3a1,Mrpl9,Mrps15,Mrpl33,Rpl6,Rpl28,Mrps11,Rps3,Rps4x,Rpl4,Rpsa,Mrpl3,Mrps2,Mrps6,Rpl21,Mrpl12,Rps27l,Rpl10a,Rps23,Mrps9,Rpl18a,Rps21,Rpl37a,Rps27rt,Mrps21,Rps15,Rpl7,Rpl26,Rps12,Rps7,Gm7536,Rpl17,Rpl15,Rps25,Rpl36,Rps17,Rpl35,Rpl29,Rpl3,Rpl32,Rpl5,Rplp2,Rplp0,Gm9396,Rpl34,Rpl27,R…
mmu04512	ECM-receptor interaction	43	2.19536	top	2.03e-08	ks	10090.ENSMUSP00000001147,10090.ENSMUSP00000001181,10090.ENSMUSP00000001547,10090.ENSMUSP00000001548,10090.ENSMUSP00000002979,10090.ENSMUSP00000015791,10090.ENSMUSP00000017488,10090.ENSMUSP00000019992,10090.ENSMUSP00000021028,10090.ENSMUSP00000023128,10090.ENSMUSP00000026360,10090.ENSMUSP00000027752,10090.ENSMUSP00000028106,10090.ENSMUSP00000028187,10090.ENSMUSP00000028499,10090.ENSMUSP00000028522…	Col6a1,Col6a2,Col1a1,Itga3,Lamb1,Lama5,Vtn,Lama4,Itgb3,Itga5,Itgb8,Lamc1,Itga8,Lamc3,Itgav,Itga6,Col1a2,Col4a1,Col4a2,Sv2a,Lama1,Thbs1,Itga2,Fn1,Gp1bb,Lamb2,Itgb5,Itga1,Itgb1,Lama3,Lama2,Col6a6,Itga7,Itga2b,Cd47,Itgb4,Tnr,Vwf,Col4a3,Sv2b,Dag1,Cd36,Agrn
mmu05012	Parkinson disease	170	0.36506	top	1.02e-07	ks	10090.ENSMUSP00000000001,10090.ENSMUSP00000000090,10090.ENSMUSP00000001513,10090.ENSMUSP00000001566,10090.ENSMUSP00000001989,10090.ENSMUSP00000002452,10090.ENSMUSP00000003642,10090.ENSMUSP00000005164,10090.ENSMUSP00000005487,10090.ENSMUSP00000005606,10090.ENSMUSP00000005647,10090.ENSMUSP00000005923,10090.ENSMUSP00000006137,10090.ENSMUSP00000007212,10090.ENSMUSP00000007803,10090.ENSMUSP00000010007…	Gnai3,Cox5a,Tubb6,Tubb5,Uba1,Ndufa11,Klc4,Prkacb,Txn2,Prkaca,Ndufs3,Psmb4,Trap1,Psmd2,Bcl2l1,Sdhb,Ndufs2,Ndufa2,Cox6c,Psmb1,Atp5e,Tubb1,Slc25a5,Ndufa1,Psmd3,Psmd11,Psmb6,Mcu,Uqcr11,Mapk9,Psmc5,Psmd12,Ube2g1,Psma6,Psmc1,Tubal3,Uqcrb,Sdha,Ndufs6,Psmd6,Ndufs4,Vdac2,Psmc6,Ppif,Psmb5,Ndufb9,Ndufa6,Cyc1,Ndufb4,Atp5j,Atp5o,Ndufa5,Kif5b,Maoa,Ndufb8,Atp5b,Atp5a1,Psmd13,Uqcrc1,Ndufs1,Ndufb3,Psmd1,Ndufa10,P…
mmu05020	Prion disease	175	0.408935	top	1.02e-07	ks	10090.ENSMUSP00000000058,10090.ENSMUSP00000000090,10090.ENSMUSP00000001513,10090.ENSMUSP00000001566,10090.ENSMUSP00000002452,10090.ENSMUSP00000003642,10090.ENSMUSP00000004990,10090.ENSMUSP00000005164,10090.ENSMUSP00000005606,10090.ENSMUSP00000005647,10090.ENSMUSP00000005923,10090.ENSMUSP00000007212,10090.ENSMUSP00000007248,10090.ENSMUSP00000007799,10090.ENSMUSP00000010007,10090.ENSMUSP00000013737…	Cav2,Cox5a,Tubb6,Tubb5,Ndufa11,Klc4,Mapk14,Prkacb,Prkaca,Ndufs3,Psmb4,Psmd2,Hspa1l,Cav1,Sdhb,Ndufs2,Ndufa2,Cox6c,Psmb1,Cybb,Hspa8,Atp5e,Tubb1,Slc25a5,Ndufa1,Psmd3,Psmd11,Psmb6,Mcu,Uqcr11,Mapk9,Psmc5,Psmd12,Psma6,Psmc1,Tubal3,Uqcrb,Sdha,Ndufs6,Psmd6,Ndufs4,Vdac2,Psmc6,Ppif,Psmb5,Ndufb9,Ndufa6,Cyc1,Gsk3b,Ndufb4,Atp5j,Atp5o,Sod1,Ndufa5,Kif5b,Csnk2b,Bad,Stip1,Ndufb8,Atp5b,Atp5a1,Psmd13,Uqcrc1,Ndufs1,…
mmu04260	Cardiac muscle contraction	40	0.685289	top	1.16e-05	ks	10090.ENSMUSP00000000090,10090.ENSMUSP00000003575,10090.ENSMUSP00000014080,10090.ENSMUSP00000014457,10090.ENSMUSP00000018800,10090.ENSMUSP00000020372,10090.ENSMUSP00000021142,10090.ENSMUSP00000021993,10090.ENSMUSP00000023210,10090.ENSMUSP00000026743,10090.ENSMUSP00000027863,10090.ENSMUSP00000029454,10090.ENSMUSP00000030669,10090.ENSMUSP00000031423,10090.ENSMUSP00000033176,10090.ENSMUSP00000034276…	Cox5a,Tpm4,Myl2,Cox6c,Myl4,Uqcr11,Atp2a3,Uqcrb,Cyc1,Uqcrc1,Atp1b1,Casq2,Slc9a1,Atp2a2,Uqcrc2,Cox4i1,Cox7a2,Atp1b3,Gm11273,Atp1a1,Uqcrfs1,Atp1b2,Cox6a1,Cacna2d1,Uqcrq,Uqcr10,Cox6b1,Asph,Uqcrh,mt-Co1,mt-Co2,Atp1a2,Slc8a1,Atp1a3,Cox4i2,Atp1a4,Tpm1,Tpm3,Cox7c,Slc8a2
mmu05016	Huntington disease	194	0.330018	top	2.38e-05	ks	10090.ENSMUSP00000000090,10090.ENSMUSP00000001326,10090.ENSMUSP00000001513,10090.ENSMUSP00000001566,10090.ENSMUSP00000002452,10090.ENSMUSP00000003038,10090.ENSMUSP00000003642,10090.ENSMUSP00000004786,10090.ENSMUSP00000005493,10090.ENSMUSP00000005509,10090.ENSMUSP00000005647,10090.ENSMUSP00000005923,10090.ENSMUSP00000007012,10090.ENSMUSP00000007212,10090.ENSMUSP00000007216,10090.ENSMUSP00000010007…	Cox5a,Sp1,Tubb6,Tubb5,Ndufa11,Ap2a2,Klc4,Polr2e,Slc1a3,Stx1a,Ndufs3,Psmb4,Sod2,Psmd2,Ap2m1,Sdhb,Ndufs2,Ndufa2,Cox6c,Psmb1,Atp5e,Tubb1,Slc25a5,Ndufa1,Psmd3,Psmd11,Psmb6,Dlg4,Ap2b1,Polr2i,Hdac2,Uqcr11,Mapk9,Psmc5,Psmd12,Polr2h,Psma6,Actr10,Psmc1,Tubal3,Uqcrb,Sdha,Ndufs6,Psmd6,Ndufs4,Vdac2,Psmc6,Ppif,Psmb5,Ndufb9,Ndufa6,Crebbp,Cyc1,Ndufb4,Atp5j,Atp5o,Sod1,Ndufa5,Kif5b,Dctn4,Gnaq,Plcb3,Ndufb8,Atp5b,D…
mmu04020	Calcium signaling pathway	59	0.642429	top	4.01e-05	ks	10090.ENSMUSP00000005164,10090.ENSMUSP00000005606,10090.ENSMUSP00000010804,10090.ENSMUSP00000016463,10090.ENSMUSP00000020107,10090.ENSMUSP00000020312,10090.ENSMUSP00000020329,10090.ENSMUSP00000021142,10090.ENSMUSP00000022293,10090.ENSMUSP00000022419,10090.ENSMUSP00000023132,10090.ENSMUSP00000023538,10090.ENSMUSP00000025522,10090.ENSMUSP00000025541,10090.ENSMUSP00000025602,10090.ENSMUSP00000025912…	Prkacb,Prkaca,Plcd1,Slc25a5,Atp2b1,Mcu,Egfr,Atp2a3,Vdac2,Ppif,Pde1b,Mylk,Pdgfrb,Gnaq,Gna14,Plcb3,Itpka,Casq2,Nos3,Cd38,Atp2a2,Itpr1,Camk1,Stim1,Slc25a4,Itpr3,Tpcn1,Gna11,Itpr2,Phkb,Ppp3ca,Erbb2,Adrb2,Prkca,Prkcb,Camk2g,Asph,Plcg2,Slc8a1,Atp2b2,Prkcg,Plcd3,Plcg1,Nos1,Pde1a,Vdac1,Ppp3r1,Camk2a,Tbxa2r,Camk2b,Plcb1,Orai1,Stim2,Adcy9,Atp2b4,Slc8a2,Adcy4,Plce1,Vdac3
mmu04721	Synaptic vesicle cycle	40	1.06961	top	4.01e-05	ks	10090.ENSMUSP00000003038,10090.ENSMUSP00000004396,10090.ENSMUSP00000005493,10090.ENSMUSP00000005509,10090.ENSMUSP00000006181,10090.ENSMUSP00000006435,10090.ENSMUSP00000007216,10090.ENSMUSP00000013304,10090.ENSMUSP00000018875,10090.ENSMUSP00000019354,10090.ENSMUSP00000021273,10090.ENSMUSP00000021536,10090.ENSMUSP00000022904,10090.ENSMUSP00000024932,10090.ENSMUSP00000025875,10090.ENSMUSP00000026985…	Ap2a2,Atp6v1f,Slc1a3,Stx1a,Napa,Atp6v1b2,Ap2m1,Atp6v0d1,Ap2b1,Atp6v1e1,Vamp2,Atp6v1d,Atp6v1c1,Atp6v0c,Slc1a1,Cplx2,Slc6a9,Slc6a11,Slc6a1,Cplx1,Atp6v0a2,Atp6v1h,Atp6v0a1,Atp6v1g1,Dnm3,Atp6v1g2,Slc1a2,Slc17a7,Ap2s1,Dnm1,Stxbp1,Nsf,Cltc,Syt1,Stx1b,Unc13b,Rab3a,Atp6v1a,Ap2a1,Dnm2
mmu04723	Retrograde endocannabinoid signaling	75	0.408751	top	4.62e-05	ks	10090.ENSMUSP00000000001,10090.ENSMUSP00000002452,10090.ENSMUSP00000004990,10090.ENSMUSP00000005164,10090.ENSMUSP00000005606,10090.ENSMUSP00000005647,10090.ENSMUSP00000013737,10090.ENSMUSP00000014438,10090.ENSMUSP00000016571,10090.ENSMUSP00000020634,10090.ENSMUSP00000022097,10090.ENSMUSP00000022286,10090.ENSMUSP00000022980,10090.ENSMUSP00000023085,10090.ENSMUSP00000023514,10090.ENSMUSP00000023851…	Gnai3,Ndufa11,Mapk14,Prkacb,Prkaca,Ndufs3,Ndufs2,Ndufa2,Ndufa1,Mapk9,Ndufs6,Ndufs4,Ndufb9,Ndufa6,Ndufb4,Ndufa5,Gnaq,Plcb3,Ndufb8,Ndufs1,Ndufb3,Ndufa10,Ndufs5,Gnb1,Ndufa4,Gng11,Gnb2,Itpr1,Ndufc2,Ndufab1,Ndufb7,Itpr3,Ndufa7,Ndufa4l2,Ndufv1,Ndufb10,Ndufv3,Itpr2,Mapk3,Napepld,Gnai2,Prkca,Ndufa8,Mapk1,Prkcb,Gnai1,Ndufs8,Ndufa3,Gnb5,mt-Nd1,mt-Nd2,mt-Nd4,mt-Nd5,Slc17a7,Ndufa9,Mapk12,Gng5,Ndufb6,Adcy6,Pr…
mmu00982	Drug metabolism - cytochrome P450	24	1.19453	bottom	5.29e-05	ks	10090.ENSMUSP00000001713,10090.ENSMUSP00000001715,10090.ENSMUSP00000004134,10090.ENSMUSP00000004137,10090.ENSMUSP00000004140,10090.ENSMUSP00000004232,10090.ENSMUSP00000005964,10090.ENSMUSP00000008684,10090.ENSMUSP00000012348,10090.ENSMUSP00000019246,10090.ENSMUSP00000026013,10090.ENSMUSP00000026552,10090.ENSMUSP00000027067,10090.ENSMUSP00000028005,10090.ENSMUSP00000031897,10090.ENSMUSP00000034903…	Gstt1,Gstt3,Gstm5,Gstm7,Gstm1,Adh1,Adh5,Mgst1,Gstm2,Aldh3a1,Maoa,Cyp2e1,Gsta3,Mgst3,Gstk1,Gsta4,Fmo1,Maob,Fmo2,Gstt2,Aldh3b1,Ugt1a1,Fmo5,Gstp1
mmu05204	Chemical carcinogenesis	26	1.27037	bottom	6.37e-05	ks	10090.ENSMUSP00000001713,10090.ENSMUSP00000001715,10090.ENSMUSP00000003137,10090.ENSMUSP00000004134,10090.ENSMUSP00000004137,10090.ENSMUSP00000004140,10090.ENSMUSP00000004232,10090.ENSMUSP00000005964,10090.ENSMUSP00000008684,10090.ENSMUSP00000012348,10090.ENSMUSP00000016338,10090.ENSMUSP00000019246,10090.ENSMUSP00000026552,10090.ENSMUSP00000027067,10090.ENSMUSP00000028005,10090.ENSMUSP00000031897…	Gstt1,Gstt3,Cyp2c29,Gstm5,Gstm7,Gstm1,Adh1,Adh5,Mgst1,Gstm2,Hsd11b1,Aldh3a1,Cyp2e1,Gsta3,Mgst3,Gstk1,Gsta4,Ccbl2,Gstt2,Ephx1,Cbr1,Aldh3b1,Ugt1a1,Ccbl1,Gstp1,Nat2
mmu04510	Focal adhesion	115	0.838268	top	7.36e-05	ks	10090.ENSMUSP00000000058,10090.ENSMUSP00000000451,10090.ENSMUSP00000001147,10090.ENSMUSP00000001181,10090.ENSMUSP00000001547,10090.ENSMUSP00000001548,10090.ENSMUSP00000001780,10090.ENSMUSP00000002979,10090.ENSMUSP00000005066,10090.ENSMUSP00000005671,10090.ENSMUSP00000006293,10090.ENSMUSP00000007130,10090.ENSMUSP00000007799,10090.ENSMUSP00000007959,10090.ENSMUSP00000013807,10090.ENSMUSP00000013886…	Cav2,Raf1,Col6a1,Col6a2,Col1a1,Itga3,Akt1,Lamb1,Map2k1,Igf1r,Crkl,Ctnnb1,Cav1,Rhoa,Pten,Ppp1r12c,Myl2,Ppp1cb,Lama5,Vtn,Crk,Lama4,Egfr,Flt4,Mapk9,Rock2,Itgb3,Grb2,Actn1,Vcl,Parvb,Parvg,Itga5,Pak2,Gsk3b,Mylk,Diap1,Pdgfrb,Bad,Itgb8,Hras,Lamc1,Itga8,Lamc3,Itgav,Itga6,Src,Pik3ca,Tln1,Flt1,Col1a2,Vasp,Mylpf,Parva,Pak1,Ilk,Flna,Col4a1,Col4a2,Pik3cb,Rac2,Ppp1ca,Tln2,Myl12b,Lama1,Thbs1,Mapk3,Flnb,Itga2,Er…
mmu04540	Gap junction	50	0.73777	top	0.00016	ks	10090.ENSMUSP00000000001,10090.ENSMUSP00000000451,10090.ENSMUSP00000001513,10090.ENSMUSP00000001566,10090.ENSMUSP00000005066,10090.ENSMUSP00000005164,10090.ENSMUSP00000005606,10090.ENSMUSP00000016399,10090.ENSMUSP00000018274,10090.ENSMUSP00000020329,10090.ENSMUSP00000021090,10090.ENSMUSP00000021639,10090.ENSMUSP00000025522,10090.ENSMUSP00000025541,10090.ENSMUSP00000025912,10090.ENSMUSP00000026572…	Gnai3,Raf1,Tubb6,Tubb5,Map2k1,Prkacb,Prkaca,Tubb1,Csnk1d,Egfr,Grb2,Tubal3,Pdgfrb,Gnaq,Plcb3,Hras,Src,Nras,Gucy1b3,Itpr1,Tuba8,Kras,Itpr3,Tubb4b,Gna11,Gucy1a3,Itpr2,Tuba1c,Mapk3,Gnai2,Tubb2a,Prkca,Gja1,Mapk1,Sos1,Prkcb,Tubb3,Tubb4a,Prkg1,Gnai1,Adcy6,Tuba1a,Prkcg,Tjp1,Plcb1,Adcy9,Map2k2,Adcy4,Sos2,Tuba4a
mmu04514	Cell adhesion molecules	39	0.80658	top	0.00018	ks	10090.ENSMUSP00000000109,10090.ENSMUSP00000000299,10090.ENSMUSP00000001055,10090.ENSMUSP00000002011,10090.ENSMUSP00000016638,10090.ENSMUSP00000017799,10090.ENSMUSP00000020301,10090.ENSMUSP00000023312,10090.ENSMUSP00000025166,10090.ENSMUSP00000026360,10090.ENSMUSP00000028106,10090.ENSMUSP00000028499,10090.ENSMUSP00000028522,10090.ENSMUSP00000028794,10090.ENSMUSP00000029574,10090.ENSMUSP00000034339…	Cntn1,Itgb2,Icam2,Esam,Cd34,Cd40,Vsir,Alcam,Cdh2,Itgb8,Itga8,Itgav,Itga6,Siglec1,Vcam1,Cdh5,Jam3,F11r,Cldn5,Cldn11,Ptprm,Ocln,Mpz,Itgam,Pecam1,Cadm1,Icam1,Itgb1,Nfasc,Cntnap1,L1cam,Cadm3,Jam2,Cntnap2,Ncam1,Glg1,H2-D1,Ptprc,Mag
mmu05414	Dilated cardiomyopathy	37	0.895803	top	0.00027	ks	10090.ENSMUSP00000001548,10090.ENSMUSP00000002029,10090.ENSMUSP00000002678,10090.ENSMUSP00000003575,10090.ENSMUSP00000005164,10090.ENSMUSP00000005606,10090.ENSMUSP00000014080,10090.ENSMUSP00000021028,10090.ENSMUSP00000021142,10090.ENSMUSP00000023128,10090.ENSMUSP00000026360,10090.ENSMUSP00000027409,10090.ENSMUSP00000028106,10090.ENSMUSP00000028499,10090.ENSMUSP00000028522,10090.ENSMUSP00000029699…	Itga3,Emd,Tgfb1,Tpm4,Prkacb,Prkaca,Myl2,Itgb3,Atp2a3,Itga5,Itgb8,Des,Itga8,Itgav,Itga6,Lmna,Atp2a2,Lama1,Cacna2d1,Itga2,Itgb5,Itga1,Slc8a1,Itgb1,Lama2,Adcy6,Itga7,Actb,Itga2b,Itgb4,Tpm1,Dmd,Adcy9,Tpm3,Slc8a2,Adcy4,Dag1
mmu05412	Arrhythmogenic right ventricular cardiomyopathy	36	0.787557	top	0.00028	ks	10090.ENSMUSP00000001548,10090.ENSMUSP00000001592,10090.ENSMUSP00000002029,10090.ENSMUSP00000006626,10090.ENSMUSP00000007130,10090.ENSMUSP00000021028,10090.ENSMUSP00000021142,10090.ENSMUSP00000023128,10090.ENSMUSP00000025166,10090.ENSMUSP00000026360,10090.ENSMUSP00000027409,10090.ENSMUSP00000028106,10090.ENSMUSP00000028499,10090.ENSMUSP00000028522,10090.ENSMUSP00000029611,10090.ENSMUSP00000029699…	Itga3,Jup,Emd,Actn3,Ctnnb1,Itgb3,Atp2a3,Itga5,Cdh2,Itgb8,Des,Itga8,Itgav,Itga6,Lef1,Lmna,Atp2a2,Lama1,Ctnna1,Cacna2d1,Itga2,Gja1,Itgb5,Itga1,Slc8a1,Itgb1,Lama2,Itga7,Actb,Itga2b,Ctnna3,Itgb4,Dmd,Dsp,Slc8a2,Dag1
mmu04151	PI3K-Akt signaling pathway	133	0.645159	top	0.00047	ks	10090.ENSMUSP00000000451,10090.ENSMUSP00000001147,10090.ENSMUSP00000001181,10090.ENSMUSP00000001547,10090.ENSMUSP00000001548,10090.ENSMUSP00000001780,10090.ENSMUSP00000002979,10090.ENSMUSP00000003115,10090.ENSMUSP00000003152,10090.ENSMUSP00000003964,10090.ENSMUSP00000005066,10090.ENSMUSP00000005616,10090.ENSMUSP00000005671,10090.ENSMUSP00000006614,10090.ENSMUSP00000006911,10090.ENSMUSP00000007708…	Raf1,Col6a1,Col6a2,Col1a1,Itga3,Akt1,Lamb1,Cdkn1b,Stk11,Gys1,Map2k1,Pkn1,Igf1r,Epha2,Cdk4,Ppp2r1a,Bcl2l1,Ppp2cb,Pten,Lama5,Vtn,Ywhab,Ywhah,Cdc37,Lama4,Hsp90b1,Egfr,Ppp2ca,Flt4,Itgb3,Grb2,Ppp2r5e,Osmr,Ywhaz,Itga5,Gsk3b,Ifnar2,Hsp90ab1,Pdgfrb,Ppp2r5b,Rps6kb2,Rela,Bad,Chuk,Itgb8,Cdk2,Hras,Rptor,Lamc1,Itga8,Lamc3,Itgav,Itga6,Pik3ca,Nras,Eif4e,Nfkb1,Rheb,Nos3,Gnb1,Flt1,Col1a2,Gng11,Gnb2,Kras,Col4a1,Co…
mmu05410	Hypertrophic cardiomyopathy	37	0.895207	top	0.00047	ks	10090.ENSMUSP00000001548,10090.ENSMUSP00000001963,10090.ENSMUSP00000002029,10090.ENSMUSP00000002678,10090.ENSMUSP00000003575,10090.ENSMUSP00000014080,10090.ENSMUSP00000021028,10090.ENSMUSP00000021142,10090.ENSMUSP00000023128,10090.ENSMUSP00000026360,10090.ENSMUSP00000027409,10090.ENSMUSP00000028106,10090.ENSMUSP00000028499,10090.ENSMUSP00000028522,10090.ENSMUSP00000029699,10090.ENSMUSP00000030784…	Itga3,Ace,Emd,Tgfb1,Tpm4,Myl2,Itgb3,Atp2a3,Itga5,Itgb8,Des,Itga8,Itgav,Itga6,Lmna,Prkag2,Atp2a2,Prkab1,Lama1,Cacna2d1,Itga2,Prkaa1,Itgb5,Itga1,Slc8a1,Itgb1,Lama2,Itga7,Actb,Itga2b,Itgb4,Tpm1,Dmd,Tpm3,Slc8a2,Dag1,Prkag1
mmu04261	Adrenergic signaling in cardiomyocytes	61	0.530721	top	0.00059	ks	10090.ENSMUSP00000000001,10090.ENSMUSP00000001780,10090.ENSMUSP00000003575,10090.ENSMUSP00000004990,10090.ENSMUSP00000005164,10090.ENSMUSP00000005606,10090.ENSMUSP00000007708,10090.ENSMUSP00000009774,10090.ENSMUSP00000014080,10090.ENSMUSP00000015100,10090.ENSMUSP00000018800,10090.ENSMUSP00000020107,10090.ENSMUSP00000020608,10090.ENSMUSP00000021142,10090.ENSMUSP00000021447,10090.ENSMUSP00000025541…	Gnai3,Akt1,Tpm4,Mapk14,Prkacb,Prkaca,Ppp2r1a,Ppp2cb,Myl2,Ppp1cb,Myl4,Atp2b1,Ppp2ca,Atp2a3,Ppp2r5e,Gnaq,Ppp2r5b,Plcb3,Atp1b1,Slc9a1,Atp2a2,Ppp2r1b,Atp1b3,Ppp1ca,Atp1a1,Ppp2r2d,Rps6ka5,Atp1b2,Cacna2d1,Mapk3,Gnai2,Adrb2,Prkca,Mapk1,Ppp2r5a,Camk2g,Gnai1,Ppp2r5c,Atp1a2,Slc8a1,Mapk12,Atp2b2,Ppp2r2a,Adcy6,Ppp1cc,Rapgef4,Atp1a3,Camk2a,Camk2b,Plcb1,Akt3,Atp1a4,Atf2,Tpm1,Adcy9,Tpm3,Rapgef3,Atp2b4,Slc8a2,Ad…
mmu00140	Steroid hormone biosynthesis	9	2.00032	bottom	0.0006	afc	10090.ENSMUSP00000003137,10090.ENSMUSP00000006094,10090.ENSMUSP00000016338,10090.ENSMUSP00000026552,10090.ENSMUSP00000028619,10090.ENSMUSP00000038069,10090.ENSMUSP00000072803,10090.ENSMUSP00000111272,10090.ENSMUSP00000130338	Cyp2c29,Cyp2d26,Hsd11b1,Cyp2e1,Hsd17b12,H2-Ke6,Ugt1a1,Comt,Cyp2d11
mmu03040	Spliceosome	114	0.294253	bottom	0.00084	ks	10090.ENSMUSP00000001419,10090.ENSMUSP00000001818,10090.ENSMUSP00000002198,10090.ENSMUSP00000002529,10090.ENSMUSP00000002551,10090.ENSMUSP00000004200,10090.ENSMUSP00000005041,10090.ENSMUSP00000005830,10090.ENSMUSP00000007248,10090.ENSMUSP00000007266,10090.ENSMUSP00000008477,10090.ENSMUSP00000008517,10090.ENSMUSP00000014684,10090.ENSMUSP00000015800,10090.ENSMUSP00000015892,10090.ENSMUSP00000018449…	Zmat2,Crnkl1,Sf3a1,Prpf6,Snrpd1,Cwc15,U2af2,Bcas2,Hspa1l,Lsm2,Snrpb2,Prpf31,U2af1,Hspa8,Prpf3,Prpf8,Xab2,Ccdc12,Snrpd3,Slu7,Ddx42,Ddx5,Eftud2,Snw1,Acin1,Phf5a,Ncbp2,Cdc5l,Ppil1,Thoc1,Tcerg1,Rbm22,Smndc1,Alyref,Eif4a3,Thoc3,Sf3b1,Ctnnbl1,Prpf38b,Ncbp1,Ppie,Syf2,Sf3a3,Dhx15,Srsf9,Tra2a,Magohb,Lsm4,Snrpd2,Hnrnpk,U2af1l4,Prpf18,Rbm17,Hnrnpa1,Sf3b6,Cdc40,Rbm8a,Thoc2,Lsm7,Sf3b3,Aqr,Sart1,Hnrnpu,Rbmxl1,…
mmu04932	Non-alcoholic fatty liver disease	91	0.201461	top	0.001	ks	10090.ENSMUSP00000000090,10090.ENSMUSP00000001780,10090.ENSMUSP00000002452,10090.ENSMUSP00000002678,10090.ENSMUSP00000004156,10090.ENSMUSP00000005647,10090.ENSMUSP00000010007,10090.ENSMUSP00000013737,10090.ENSMUSP00000014438,10090.ENSMUSP00000014457,10090.ENSMUSP00000016571,10090.ENSMUSP00000020372,10090.ENSMUSP00000020634,10090.ENSMUSP00000021993,10090.ENSMUSP00000022062,10090.ENSMUSP00000022097…	Cox5a,Akt1,Ndufa11,Tgfb1,Map3k11,Ndufs3,Sdhb,Ndufs2,Ndufa2,Cox6c,Ndufa1,Uqcr11,Mapk9,Uqcrb,Sdha,Ndufs6,Ndufs4,Ndufb9,Ndufa6,Cyc1,Gsk3b,Ndufb4,Adipoq,Ndufa5,Fas,Rela,Casp7,Ndufb8,Cyp2e1,Uqcrc1,Ndufs1,Casp8,Ndufb3,Ndufa10,Pik3ca,Nfkb1,Ndufs5,Prkag2,Prkab1,Ndufa4,Ndufc2,Bax,Ndufab1,Uqcrc2,Ikbkb,Cox4i1,Cox7a2,Pik3cb,Ndufb7,Gm11273,Ndufa7,Ndufa4l2,Ndufv1,Ndufb10,Uqcrfs1,Cox6a1,Ndufv3,Uqcrq,Cdc42,Uqcr1…
mmu04727	GABAergic synapse	31	0.677476	top	0.0011	ks	10090.ENSMUSP00000000001,10090.ENSMUSP00000005164,10090.ENSMUSP00000005606,10090.ENSMUSP00000023099,10090.ENSMUSP00000029175,10090.ENSMUSP00000030940,10090.ENSMUSP00000031670,10090.ENSMUSP00000031726,10090.ENSMUSP00000032451,10090.ENSMUSP00000032454,10090.ENSMUSP00000033512,10090.ENSMUSP00000034428,10090.ENSMUSP00000037854,10090.ENSMUSP00000057543,10090.ENSMUSP00000062392,10090.ENSMUSP00000063548…	Gnai3,Prkacb,Prkaca,Slc38a2,Src,Gnb1,Gng11,Gnb2,Slc6a11,Slc6a1,Slc38a5,Gabarapl2,Plcl1,Gnai2,Prkca,Abat,Prkcb,Gnai1,Gnb5,Glul,Gng5,Adcy6,Prkcg,Nsf,Gng12,Gls,Adcy9,Gnb4,Gng2,Slc38a3,Adcy4
mmu04728	Dopaminergic synapse	60	0.300019	top	0.003	ks	10090.ENSMUSP00000000001,10090.ENSMUSP00000001780,10090.ENSMUSP00000004990,10090.ENSMUSP00000005164,10090.ENSMUSP00000005606,10090.ENSMUSP00000007708,10090.ENSMUSP00000009774,10090.ENSMUSP00000015100,10090.ENSMUSP00000020608,10090.ENSMUSP00000020634,10090.ENSMUSP00000021447,10090.ENSMUSP00000023507,10090.ENSMUSP00000025083,10090.ENSMUSP00000025541,10090.ENSMUSP00000025695,10090.ENSMUSP00000025912…	Gnai3,Akt1,Mapk14,Prkacb,Prkaca,Ppp2r1a,Ppp2cb,Ppp1cb,Ppp2ca,Mapk9,Ppp2r5e,Gsk3b,Kif5b,Gnaq,Ppp2r5b,Plcb3,Maoa,Kif5c,Gnb1,Gng11,Gnb2,Itpr1,Ppp2r1b,Itpr3,Ppp1ca,Ppp2r2d,Maob,Arntl,Itpr2,Ppp3ca,Gnai2,Prkca,Prkcb,Ppp2r5a,Gsk3a,Camk2g,Gnai1,Gnb5,Ppp1r1b,Ppp2r5c,Mapk12,Ppp2r2a,Gng5,Arrb1,Kif5a,Prkcg,Ppp1cc,Camk2a,Arrb2,Camk2b,Plcb1,Akt3,Mapk8,Atf2,Gng12,Comt,Gnb4,Gng2,Ddc,Creb1
mmu00983	Drug metabolism - other enzymes	36	0.904597	bottom	0.0036	ks	10090.ENSMUSP00000001713,10090.ENSMUSP00000001715,10090.ENSMUSP00000004134,10090.ENSMUSP00000004137,10090.ENSMUSP00000004140,10090.ENSMUSP00000008684,10090.ENSMUSP00000012348,10090.ENSMUSP00000020779,10090.ENSMUSP00000021217,10090.ENSMUSP00000021806,10090.ENSMUSP00000022901,10090.ENSMUSP00000023510,10090.ENSMUSP00000024866,10090.ENSMUSP00000024978,10090.ENSMUSP00000026552,10090.ENSMUSP00000026613…	Gstt1,Gstt3,Gstm5,Gstm7,Gstm1,Mgst1,Gstm2,Mpo,Nme2,Tpmt,Rrm2b,Umps,Xdh,Nme3,Cyp2e1,Gusb,Hprt,Gsta3,Mgst3,Gmps,Cmpk1,Rrm1,Ces1d,Ces1c,Gsta4,Gstt2,Uckl1,Tk2,Ces2c,Ugt1a1,Impdh1,Impdh2,Itpa,Nme1,Gstp1,Nat2
mmu04976	Bile secretion	32	1.05902	both ends	0.0041	ks	10090.ENSMUSP00000003717,10090.ENSMUSP00000004774,10090.ENSMUSP00000005164,10090.ENSMUSP00000005606,10090.ENSMUSP00000010251,10090.ENSMUSP00000027863,10090.ENSMUSP00000029078,10090.ENSMUSP00000030398,10090.ENSMUSP00000030669,10090.ENSMUSP00000031822,10090.ENSMUSP00000034713,10090.ENSMUSP00000034983,10090.ENSMUSP00000037022,10090.ENSMUSP00000039657,10090.ENSMUSP00000041204,10090.ENSMUSP00000045864…	Abcb4,Aqp1,Prkacb,Prkaca,Slc22a8,Atp1b1,Car2,Slc2a1,Slc9a1,Abcg2,Ldlr,Atp1b3,Slco1a1,Atp1a1,Abcb1a,Nceh1,Atp1b2,Ephx1,Ugt1a1,Aqp4,Slc4a2,Atp1a2,Scarb1,Adcy6,Abcb11,Atp1a3,Atp1a4,Slco1a6,Adcy9,Slc4a4,Adcy4,Slco1a4
mmu05150	Staphylococcus aureus infection	12	1.69364	both ends	0.0043	afc	10090.ENSMUSP00000000299,10090.ENSMUSP00000007272,10090.ENSMUSP00000014578,10090.ENSMUSP00000024988,10090.ENSMUSP00000025797,10090.ENSMUSP00000037018,10090.ENSMUSP00000068468,10090.ENSMUSP00000069418,10090.ENSMUSP00000083587,10090.ENSMUSP00000103039,10090.ENSMUSP00000107607,10090.ENSMUSP00000107653	Itgb2,Krt14,Plg,C3,Mbl2,Fgg,Itgam,C4b,Icam1,Krt36,Cfh,Camp
mmu05323	Rheumatoid arthritis	21	0.642213	top	0.0052	ks	10090.ENSMUSP00000000299,10090.ENSMUSP00000002678,10090.ENSMUSP00000004396,10090.ENSMUSP00000006435,10090.ENSMUSP00000013304,10090.ENSMUSP00000019231,10090.ENSMUSP00000019354,10090.ENSMUSP00000021536,10090.ENSMUSP00000021933,10090.ENSMUSP00000022904,10090.ENSMUSP00000024932,10090.ENSMUSP00000031653,10090.ENSMUSP00000039737,10090.ENSMUSP00000040756,10090.ENSMUSP00000044838,10090.ENSMUSP00000048770…	Itgb2,Tgfb1,Atp6v1f,Atp6v1b2,Atp6v0d1,Atp6ap1,Atp6v1e1,Atp6v1d,Ctsl,Atp6v1c1,Atp6v0c,Flt1,Atp6v0a2,Atp6v1h,Atp6v0a1,Atp6v1g1,Atp6v1g2,Cxcl12,Icam1,Tek,Atp6v1a
mmu00980	Metabolism of xenobiotics by cytochrome P450	26	0.93066	bottom	0.006	ks	10090.ENSMUSP00000001713,10090.ENSMUSP00000001715,10090.ENSMUSP00000004134,10090.ENSMUSP00000004137,10090.ENSMUSP00000004140,10090.ENSMUSP00000004232,10090.ENSMUSP00000005964,10090.ENSMUSP00000008684,10090.ENSMUSP00000011526,10090.ENSMUSP00000012348,10090.ENSMUSP00000016338,10090.ENSMUSP00000019246,10090.ENSMUSP00000026148,10090.ENSMUSP00000026552,10090.ENSMUSP00000027067,10090.ENSMUSP00000028005…	Gstt1,Gstt3,Gstm5,Gstm7,Gstm1,Adh1,Adh5,Mgst1,Dhdh,Gstm2,Hsd11b1,Aldh3a1,Cbr2,Cyp2e1,Gsta3,Mgst3,Gstk1,Gsta4,Gstt2,Ephx1,Cbr3,Cbr1,Aldh3b1,Ugt1a1,Akr7a5,Gstp1
mmu04921	Oxytocin signaling pathway	60	0.446672	top	0.006	ks	10090.ENSMUSP00000000001,10090.ENSMUSP00000000451,10090.ENSMUSP00000005066,10090.ENSMUSP00000005164,10090.ENSMUSP00000005606,10090.ENSMUSP00000007959,10090.ENSMUSP00000013886,10090.ENSMUSP00000015100,10090.ENSMUSP00000020329,10090.ENSMUSP00000020904,10090.ENSMUSP00000023538,10090.ENSMUSP00000025541,10090.ENSMUSP00000025912,10090.ENSMUSP00000026572,10090.ENSMUSP00000029175,10090.ENSMUSP00000029445…	Gnai3,Raf1,Map2k1,Prkacb,Prkaca,Rhoa,Ppp1r12c,Ppp1cb,Egfr,Rock2,Mylk,Gnaq,Plcb3,Hras,Src,Nras,Npr1,Gucy1b3,Prkag2,Nos3,Cd38,Prkab1,Itpr1,Kras,Camk1,Itpr3,Ppp1ca,Eef2,Eef2k,Gucy1a3,Cacna2d1,Itpr2,Mapk3,Ppp3ca,Gnai2,Prkca,Prkaa1,Mapk1,Ppp1r12a,Rock1,Prkcb,Pla2g4a,Camk2g,Gnai1,Myl9,Adcy6,Prkcg,Actb,Ppp1cc,Ppp3r1,Camk2a,Camk2b,Plcb1,Camkk2,Adcy9,Map2k2,Myl6,Adcy4,Ppp1r12b,Prkag1
mmu04972	Pancreatic secretion	39	0.480013	top	0.006	ks	10090.ENSMUSP00000003121,10090.ENSMUSP00000007959,10090.ENSMUSP00000020107,10090.ENSMUSP00000021142,10090.ENSMUSP00000025541,10090.ENSMUSP00000025912,10090.ENSMUSP00000027863,10090.ENSMUSP00000029078,10090.ENSMUSP00000030669,10090.ENSMUSP00000030964,10090.ENSMUSP00000031423,10090.ENSMUSP00000032192,10090.ENSMUSP00000034983,10090.ENSMUSP00000038150,10090.ENSMUSP00000039657,10090.ENSMUSP00000047353…	Rab8a,Rhoa,Atp2b1,Atp2a3,Gnaq,Plcb3,Atp1b1,Car2,Slc9a1,Cd38,Atp2a2,Itpr1,Atp1b3,Itpr3,Atp1a1,Atp1b2,Itpr2,Prkca,Rap1b,Prkcb,Slc4a2,Rac1,Atp1a2,Atp2b2,Rap1a,Adcy6,Amy2a2,Prkcg,Atp1a3,Plcb1,Atp1a4,Slc12a2,Rab3d,Adcy9,Rab27b,Atp2b4,Slc4a4,Rab11a,Adcy4
mmu04974	Protein digestion and absorption	31	1.14508	top	0.006	ks	10090.ENSMUSP00000001147,10090.ENSMUSP00000001181,10090.ENSMUSP00000001547,10090.ENSMUSP00000023099,10090.ENSMUSP00000025875,10090.ENSMUSP00000027863,10090.ENSMUSP00000029848,10090.ENSMUSP00000031668,10090.ENSMUSP00000033898,10090.ENSMUSP00000033899,10090.ENSMUSP00000034983,10090.ENSMUSP00000039657,10090.ENSMUSP00000044050,10090.ENSMUSP00000047353,10090.ENSMUSP00000071662,10090.ENSMUSP00000075429…	Col6a1,Col6a2,Col1a1,Slc38a2,Slc1a1,Atp1b1,Col24a1,Col1a2,Col4a1,Col4a2,Atp1b3,Atp1a1,Dpp4,Atp1b2,Col12a1,Prcp,Atp1a2,Col5a2,Slc8a1,Col3a1,Col11a1,Col6a6,Atp1a3,Slc1a5,Slc36a1,Atp1a4,Ace2,Kcnj13,Col4a3,Slc8a2,Slc3a2
mmu04724	Glutamatergic synapse	44	0.70202	top	0.0094	ks	10090.ENSMUSP00000000001,10090.ENSMUSP00000004076,10090.ENSMUSP00000005164,10090.ENSMUSP00000005493,10090.ENSMUSP00000005606,10090.ENSMUSP00000018700,10090.ENSMUSP00000023099,10090.ENSMUSP00000025541,10090.ENSMUSP00000025791,10090.ENSMUSP00000025875,10090.ENSMUSP00000025912,10090.ENSMUSP00000030940,10090.ENSMUSP00000031670,10090.ENSMUSP00000031726,10090.ENSMUSP00000032192,10090.ENSMUSP00000038150…	Gnai3,Grm3,Prkacb,Slc1a3,Prkaca,Dlg4,Slc38a2,Gnaq,Adrbk1,Slc1a1,Plcb3,Gnb1,Gng11,Gnb2,Itpr1,Itpr3,Itpr2,Mapk3,Ppp3ca,Gnai2,Prkca,Mapk1,Prkcb,Pla2g4a,Gnai1,Gnb5,Slc1a2,Slc17a7,Glul,Gng5,Adcy6,Prkcg,Ppp3r1,Shank3,Plcb1,Gng12,Gls,Adcy9,Pld1,Homer3,Gnb4,Gng2,Slc38a3,Adcy4
